# Supplementary material for: Specific, targetable interactions with the microenvironment influence imatinib-resistant chronic myeloid leukemia
Source: Springer Nature journal article supplement (doi:10.1038/s41375-020-0866-1), 2020-05-21
Supplement: MOESM2 [file 41375_2020_866_MOESM2_ESM.pdf]

**Supplementary Table 3:** List of proteins and their normalized SILAC ratio (H/M); H=BCR-ABL1 T315I, M=BCR-ABL1

| Protein names                                                                                                                   | Gene names                    | Normalized SILAC ratio (H/M) | Intensity   |
|---------------------------------------------------------------------------------------------------------------------------------|-------------------------------|------------------------------|-------------|
| L-lactate dehydrogenase;L-lactate dehydrogenase B chain;L-lactate dehydrogenase A-like 6A                                       | LDHB;LDHC;LDHAL6A             | 11,94186699                  | 18142000    |
| Protein SF11 homolog                                                                                                            | SF11                          | 9,146620324                  | 16950000    |
| Integrin beta;Integrin beta-3                                                                                                   | ITGB3                         | 5,156499768                  | 103310000   |
| ATP synthase mitochondrial F1 complex assembly factor 1                                                                         | ATPAF1                        | 4,048255202                  | 134110000   |
| NADH dehydrogenase [ubiquinone] 1 beta subcomplex subunit 10                                                                    | NDUFB10                       | 3,579866829                  | 1250700000  |
| Inositol hexakisphosphate and diphosphoinositol-pentakisphosphate kinase 1                                                      | PPIP5K1                       | 2,517876928                  | 11215000    |
| Nuclear receptor subfamily 2 group C member 2                                                                                   | NR2C2                         | 2,455675065                  | 7670200     |
| Zinc-alpha-2-glycoprotein                                                                                                       | AZGP1                         | 2,384301757                  | 45410000    |
| Coagulation factor V;Coagulation factor V heavy chain;Coagulation factor V light chain                                          | F5                            | 2,050987551                  | 77196000    |
| Protein-glutamine gamma-glutamyltransferase K                                                                                   | TGM1                          | 2,042066571                  | 27468000    |
| Antigen peptide transporter 2                                                                                                   | TAP2;TAP2-G                   | 2,026424576                  | 525610000   |
| Pre-rRNA-processing protein TSR2 homolog                                                                                        | TSR2                          | 1,986097319                  | 68805000    |
| Phosphoinositide 3-kinase adapter protein 1                                                                                     | PIK3AP1;FLJ00308              | 1,96858144                   | 104440000   |
| Pleckstrin                                                                                                                      | PLEK                          | 1,955569462                  | 1212200000  |
| YY1-associated factor 2                                                                                                         | YAF2                          | 1,923816853                  | 106620000   |
| Ubiquitin thioesterase OTU1                                                                                                     | YOD1                          | 1,875152356                  | 72977000    |
| Bromodomain-containing protein 2                                                                                                | BRD2                          | 1,860845941                  | 81180000    |
| Twisted gastrulation protein homolog 1                                                                                          | TWSG1                         | 1,860119048                  | 44041000    |
| Ubiquitin-conjugating enzyme E2 J2                                                                                              | UBE2J2                        | 1,852194851                  | 29026000    |
| Histone H1.2                                                                                                                    | HIST1H1C                      | 1,849762306                  | 35773000    |
| Desmocollin-1                                                                                                                   | DSC1                          | 1,837863667                  | 49583000    |
| Zinc finger SWIM domain-containing protein 8                                                                                    | ZSWIM8                        | 1,812513594                  | 168200000   |
| Putative oxidoreductase GLYR1                                                                                                   | GLYR1;N-PAC                   | 1,793754148                  | 35852000    |
| E3 SUMO-protein ligase PIAS1                                                                                                    | PIAS1                         | 1,787086513                  | 14509000    |
| Sjogren syndrome nuclear autoantigen 1                                                                                          | SSNA1                         | 1,781546739                  | 209040000   |
| Adenylosuccinate synthetase isozyme 1                                                                                           | ADSSL1                        | 1,775252974                  | 120450000   |
| BCL2/adenovirus E1B 19 kDa protein-interacting protein 2;Caytaxin                                                               | BNIP2;ATCAY                   | 1,765443215                  | 19942000    |
| Src-like-adapter 2                                                                                                              | SLA2                          | 1,761897211                  | 62108000    |
| Syntaxin-16                                                                                                                     | STX16;STX16-NPEPL1            | 1,736442723                  | 35278000    |
| Histone H1.0;Histone H1.0, N-terminally processed                                                                               | H1F0                          | 1,731271966                  | 3035000000  |
| Protein Churchill                                                                                                               | CHURC1;CHURC1-FNTB            | 1,71188907                   | 87964000    |
| RING1 and YY1-binding protein                                                                                                   | RYBP                          | 1,700477834                  | 162680000   |
| Selenoprotein H                                                                                                                 | C11orf31;SELH                 | 1,69511637                   | 38867000    |
| Ubiquitin-conjugating enzyme E2 C                                                                                               | UBE2C                         | 1,692906721                  | 111530000   |
| Uncharacterized protein C20orf24                                                                                                | C20orf24                      | 1,682085786                  | 29698000    |
| Histone H3.1                                                                                                                    | HIST1H3A                      | 1,678331068                  | 1530600000  |
| Engulfment and cell motility protein 2                                                                                          | ELMO2                         | 1,673080141                  | 305660000   |
| E3 ubiquitin-protein ligase RNF115                                                                                              | RNF115                        | 1,670704202                  | 94228000    |
| Golgi-associated plant pathogenesis-related protein 1                                                                           | C9orf19;GLIPR2                | 1,663174001                  | 284680000   |
| Histone H1.4;Histone H1.3                                                                                                       | HIST1H1E;HIST1H1D             | 1,654122901                  | 47559000000 |
| Protein FAM32A                                                                                                                  | FAM32A                        | 1,652182533                  | 161950000   |
| Protein CBFA2T3;Protein CBFA2T2;Protein CBFA2T1                                                                                 | CBFA2T3;RUNX1T1;MTG8;CBFA2    | 1,645738361                  | 22290000    |
| Eukaryotic translation initiation factor 4E type 2                                                                              | tmp_locus_9;EIF4E2            | 1,634334091                  | 339690000   |
| Ubiquitin-associated and SH3 domain-containing protein B                                                                        | UBASH3B                       | 1,63369329                   | 135510000   |
| Cytochrome c oxidase subunit 1                                                                                                  | COX1;cox1;COI;CO1;cox1;MT-CO1 | 1,632892997                  | 66901000    |
| Histone H3;Histone H3.3;Histone H3.1t;Histone H3.3C                                                                             | H3F3B;H3F3A;HIST3H3;H3F3C     | 1,621271077                  | 695460000   |
| ETS-related transcription factor Elf-1                                                                                          | DKFZp686H0575;ELF1            | 1,61736402                   | 85879000    |
| Tax1-binding protein 3                                                                                                          | TAX1BP3                       | 1,608829255                  | 20715000    |
| Cytoplasmic tRNA 2-thiolation protein 1                                                                                         | CTU1                          | 1,606322485                  | 70039000    |
| Protein dopey-1                                                                                                                 | DOPEY1                        | 1,599309098                  | 13349000    |
| Protein S100-A8;Protein S100-A8, N-terminally processed                                                                         | S100A8                        | 1,599155646                  | 202710000   |
| Caspase-6;Caspase-6 subunit p18;Caspase-6 subunit p11                                                                           | CASP6                         | 1,59854213                   | 620080000   |
| Cytochrome c oxidase subunit NDUFA4                                                                                             | NDUFA4                        | 1,596838054                  | 1278800000  |
| 60S ribosomal protein L7-like 1                                                                                                 | RPL7L1                        | 1,594133588                  | 77575000    |
| Histone H1.5                                                                                                                    | HIST1H1B                      | 1,587780442                  | 11585000000 |
| Integrin alpha-11b;Integrin alpha-11b heavy chain;Integrin alpha-11b light chain, form 1;Integrin alpha-11b light chain, form 2 | ITGA2B                        | 1,586520918                  | 344370000   |
| Putative uncharacterized protein C10orf115                                                                                      | C10orf115                     | 1,583556351                  | 6279700000  |
| Eukaryotic translation initiation factor 1                                                                                      | SUI1;EIF1                     | 1,58042798                   | 6271200000  |
| Nucleolar protein 9                                                                                                             | DKFZp686E1893;NOP9            | 1,574976769                  | 9894900     |
| Testis-expressed sequence 30 protein                                                                                            | TEX30                         | 1,568602845                  | 75846000    |
| Mortality factor 4-like protein 1                                                                                               | MORF4L1                       | 1,565704802                  | 466970000   |
| Poly(A) polymerase gamma                                                                                                        | PAPOLG                        | 1,545523391                  | 194770000   |
| Proline-serine-threonine phosphatase-interacting protein 2                                                                      | PSTPIP2                       | 1,544544668                  | 41533000    |
| Sestrin-2                                                                                                                       | SESN2                         | 1,539361473                  | 53213000    |
| Ubiquitin-conjugating enzyme E2 B                                                                                               | UBE2B                         | 1,538508877                  | 39995000    |
| Poly(rC)-binding protein 2                                                                                                      | PCBP2                         | 1,534330648                  | 171910000   |
| Glutaminase kidney isoform, mitochondrial                                                                                       | GLS                           | 1,534212949                  | 95194000    |
| Mitochondrial folate transporter/carrier                                                                                        | SLC25A32                      | 1,533601202                  | 253420000   |
| Transcription initiation factor TFIIID subunit 8                                                                                | TAF8                          | 1,530713772                  | 351410000   |
| Transmembrane emp24 domain-containing protein 1                                                                                 | TMED1                         | 1,529168897                  | 25587000    |
| ATP-binding cassette sub-family B member 6, mitochondrial                                                                       | ABCB6                         | 1,528491074                  | 29101000    |
| Leupaxin                                                                                                                        | LPXN                          | 1,524088214                  | 13252000    |
| Copine-2                                                                                                                        | CPNE2                         | 1,517312536                  | 184210000   |
| Cyclin-dependent kinase 1                                                                                                       | CDK1;CDC2                     | 1,512859304                  | 1246500000  |
| Dyslexia-associated protein KIAA0319-like protein                                                                               | DKFZp686L2022;KIAA0319L       | 1,511281718                  | 3209800000  |
| Transferrin receptor protein 1;Transferrin receptor protein 1, serum form                                                       | TFRC                          | 1,510437121                  | 12667000    |
| Eukaryotic translation initiation factor 1b                                                                                     | GC20;EIF1B                    | 1,507567991                  | 9557800     |
| Chromatin accessibility complex protein 1                                                                                       | CHRAC1                        | 1,506046778                  | 353770000   |
| LIM domain kinase 2                                                                                                             | LIMK2                         | 1,502245858                  | 15558000000 |
| High mobility group nucleosome-binding domain-containing protein 3;Non-histone chromosomal protein HMG-17                       | HMGN3;HMGN2                   | 1,498823424                  | 4582000     |
| DNA-directed RNA polymerase III subunit RPC6                                                                                    | CLUH                          | 1,495550737                  | 689410000   |
| E3 SUMO-protein ligase CBX4                                                                                                     | POLR3F                        | 1,495192955                  | 614460000   |
| Spindlin-1                                                                                                                      | CBX4                          | 1,494075989                  | 236780000   |
| FGFR1 oncogene partner                                                                                                          | SPIN1                         | 1,493942065                  | 168940000   |
| Ubiquitin-conjugating enzyme E2 E1                                                                                              | UBE2E1                        | 1,490846204                  | 63119000    |
| Transmembrane emp24 domain-containing protein 3                                                                                 | TMED3                         | 1,4803849                    | 185740000   |
| Ras-related protein Rap-1b;Ras-related protein Rap-1b-like protein                                                              | RAP1B                         | 1,478983642                  | 61359000    |
| Enhancer of mRNA-decapping protein 3                                                                                            | EDC3                          | 1,474165254                  | 316490000   |
| Heat shock-related 70 kDa protein 2                                                                                             | HSPA2                         | 1,471930289                  | 231020000   |
| Importin subunit alpha;Importin subunit alpha-1                                                                                 | IMP1                          | 1,470501735                  | 45879000000 |
| PDZ and LIM domain protein 7                                                                                                    | PDLM7                         | 1,469486121                  | 29145000    |
| Dual specificity protein phosphatase 12                                                                                         | DUSP12                        | 1,468428781                  | 68905000    |
| Ribosome biogenesis protein BRX1 homolog                                                                                        | BRX1;BXDC2                    | 1,462480074                  | 254790000   |
| Ubiquitin-conjugating enzyme E2 R2                                                                                              | UBE2R2                        | 1,46226622                   | 82309000    |
| Large proline-rich protein BAG6                                                                                                 | BAG6                          | 1,45902333                   | 96399000    |
| Target of rapamycin complex subunit LST8                                                                                        | MLST8                         | 1,456197577                  | 94478000    |
| AT-rich interactive domain-containing protein 3A                                                                                | ARID3A                        | 1,455921963                  | 542370000   |
| Probable ribosome biogenesis protein RLP24                                                                                      | RLP24                         | 1,455921963                  | 3479100000  |
| Tetrapeptide repeat protein 4                                                                                                   | TTCP4                         | 1,45052927                   | 84774000    |
| Transcriptional repressor p66-beta                                                                                              | GATAD2B                       | 1,450852376                  | 159560000   |
| G-protein coupled receptor 56;GPR56 N-terminal fragment;GPR56 C-terminal fragment                                               | GPR56                         | 1,44917035                   | 114660000   |
| UPF0547 protein C16orf87                                                                                                        | C16orf87                      | 1,445274674                  | 93970000    |
|                                                                                                                                 |                               | 1,444126737                  | 525580000   |
|                                                                                                                                 |                               | 1,442668359                  | 100990000   |
|                                                                                                                                 |                               | 1,438310848                  | 23379000    |

|                                                                                                                              |                          |             |            |
|------------------------------------------------------------------------------------------------------------------------------|--------------------------|-------------|------------|
| Myotubularin-related protein 3                                                                                               | MTMR3                    | 1,438269474 | 68575000   |
| Rho guanine nucleotide exchange factor 40                                                                                    | FLJ10357;ARHGEF40        | 1,437814522 | 23455000   |
| Muscleblind-like protein 1;Muscleblind-like protein 2                                                                        | MBNL1;MBLL;MBNL2         | 1,435214421 | 381000000  |
| Prostaglandin G/H synthase 1                                                                                                 | PTGS1                    | 1,433116455 | 775480000  |
| Nuclear receptor-binding factor 2                                                                                            | NRBF2                    | 1,432870039 | 41353000   |
| NEDD4 family-interacting protein 1                                                                                           | NDFI1                    | 1,43006278  | 68606000   |
| Transcriptional repressor p66-alpha                                                                                          | GATAD2A                  | 1,429572129 | 104080000  |
| Sorting nexin-20                                                                                                             | SNX20                    | 1,425252626 | 68198000   |
| Bromodomain-containing protein 3                                                                                             | MUC19                    | 1,424887078 | 156350000  |
| Serine/threonine-protein kinase tousled-like 1                                                                               | BRD3                     | 1,42454201  | 51821000   |
| Golgi phosphoprotein 3-like                                                                                                  | TLK1                     | 1,421807686 | 9385900    |
| Ras-related protein Rab-6A                                                                                                   | PCBP2                    | 1,420575617 | 272460000  |
| DNA-directed RNA polymerases I and III subunit RPAC2                                                                         | GOLPH3L                  | 1,418238548 | 53122000   |
| Protein NATD1                                                                                                                | RAB6A                    | 1,413927183 | 156850000  |
| RNA-binding protein 5                                                                                                        | POLR1D                   | 1,413068053 | 86733000   |
| Caprin-1                                                                                                                     | NATD1                    | 1,409204927 | 163320000  |
| Putative ataxin-7-like protein 3B                                                                                            | RBM5                     | 1,409105641 | 156540000  |
| GA-binding protein subunit beta-2;GA-binding protein subunit beta-1                                                          | CAPRIN1                  | 1,40637086  | 185930000  |
| Ral GTPase-activating protein subunit alpha-1                                                                                | ATXN7L3B                 | 1,405204879 | 288740000  |
| Cytochrome c oxidase subunit 5B, mitochondrial                                                                               | GABPB2;GABPB1            | 1,399129741 | 58774000   |
| LanC-like protein 2                                                                                                          | RALGAPA1                 | 1,39900591  | 37906000   |
| Mitogen-activated protein kinase;Serine/threonine-protein kinase NLK                                                         | COX5B                    | 1,397624039 | 1358400000 |
| Pseudopodium-enriched atypical kinase 1                                                                                      | LANCL2                   | 1,396823623 | 241580000  |
| Nucleolar GTP-binding protein 1                                                                                              | NLK                      | 1,395809779 | 91708000   |
| Guanine nucleotide-binding protein G(I)/G(S)/G(O) subunit gamma-2;Guanine nucleotide-binding protein subunit gamma           | PEAK1                    | 1,393320422 | 812500000  |
| Nischarin                                                                                                                    | GTPBP4                   | 1,392621889 | 533650000  |
| PDZ and LIM domain protein 2                                                                                                 | GN2                      | 1,392486145 | 158870000  |
| CD2 antigen cytoplasmic tail-binding protein 2                                                                               | NISCH                    | 1,391459223 | 477500000  |
| Nucleoporin NUP53                                                                                                            | PDLIM2                   | 1,390047262 | 85181000   |
| Selenide, water dikinase 2                                                                                                   | CD2BP2                   | 1,386827909 | 119500000  |
| Tubulin-specific chaperone cofactor E-like protein                                                                           | NUP35                    | 1,386289596 | 118480000  |
| Huntingtin-interacting protein 1-related protein                                                                             | SEPHS2                   | 1,384734685 | 21793000   |
| Arachidonate 5-lipoxygenase-activating protein                                                                               | TBCEL                    | 1,384542962 | 254920000  |
| Bromodomain adjacent to zinc finger domain protein 1A                                                                        | HIP1R                    | 1,384523793 | 70443000   |
| Cysteine-rich PDZ-binding protein                                                                                            | ALOX5AP                  | 1,382361073 | 156070000  |
| Casein kinase I isoform delta                                                                                                | BAZ1A                    | 1,3821318   | 46905000   |
| Ubiquitin-associated protein 2                                                                                               | CRIP1                    | 1,380948435 | 29217000   |
| TSC22 domain family protein 1                                                                                                | CSNK1D;CSNK1E            | 1,380452789 | 585220000  |
| Cytochrome c oxidase assembly protein COX15 homolog                                                                          | UBAP2                    | 1,374778317 | 312110000  |
| Serine/threonine-protein kinase RIO1                                                                                         | TSC22D1                  | 1,374003847 | 24418000   |
| Acetyl-coenzyme A synthetase;Acetyl-coenzyme A synthetase, cytoplasmic                                                       | COX15                    | 1,372532872 | 191240000  |
| Protein DDI1 homolog 2                                                                                                       | RIOK1                    | 1,371384687 | 29480000   |
| Ubiquitin-conjugating enzyme E2 R1                                                                                           | ACSS2;DKFZp762G026       | 1,371046245 | 513300000  |
| Probable RNA-binding protein EIF1AD                                                                                          | DDI2                     | 1,370163323 | 1145900000 |
| Metallo-beta-lactamase domain-containing protein 1                                                                           | CDC34                    | 1,370013152 | 208230000  |
| Protein scribble homolog                                                                                                     | EIF1AD                   | 1,369112815 | 207880000  |
| Ubiquitin-conjugating enzyme E2 Q1                                                                                           | MBLAC1                   | 1,364312318 | 66715000   |
| Origin recognition complex subunit 5                                                                                         | SCRIB                    | 1,363735544 | 61626000   |
| Secretory carrier-associated membrane protein 2                                                                              | GTAP;UBE2Q1              | 1,36293631  | 221170000  |
| Protein kinase C-binding protein 1                                                                                           | ORC5L;ORC5               | 1,361303584 | 116980000  |
| Ras GTPase-activating protein-binding protein 1                                                                              | SCAMP2                   | 1,358105172 | 380460000  |
| NEDD8-conjugating enzyme UBE2F                                                                                               | ZMYND8                   | 1,356557599 | 17418000   |
| Nuclear pore complex protein Nup98-Nup96;Nuclear pore complex protein Nup98;Nuclear pore complex protein Nup96               | G3BP;DKFZp686L1159;G3BP1 | 1,355197181 | 2308700000 |
| Pre-mRNA-splicing factor ISY1 homolog                                                                                        | UBE2F                    | 1,354628087 | 256300000  |
| DNA/RNA-binding protein KIN17                                                                                                | NUP98                    | 1,353216596 | 354770000  |
| Guanine nucleotide-binding protein-like 3                                                                                    | ISY1                     | 1,351972528 | 325040000  |
| Zinc finger and BTB domain-containing protein 7A                                                                             | KIN                      | 1,351406138 | 324060000  |
| Nucleolar GTP-binding protein 2                                                                                              | GNL3                     | 1,350438893 | 123740000  |
| Ubiquitin-like protein 3                                                                                                     | ZBTB7A                   | 1,349910231 | 58028000   |
| Nuclear pore complex protein Nup153                                                                                          | GNL2                     | 1,349746248 | 229580000  |
| RNA-binding protein 38;RNA-binding protein 24                                                                                | UBL3                     | 1,346837625 | 34963000   |
| D-glucuronyl C5-epimerase                                                                                                    | NUP153                   | 1,346021832 | 799620000  |
| Translation factor GUF1, mitochondrial                                                                                       | RBM38;RNP1;RBM24         | 1,344158288 | 823740000  |
| Glutathione peroxidase;Phospholipid hydroperoxide glutathione peroxidase, mitochondrial                                      | GLCE                     | 1,343435972 | 72244000   |
| Rho GTPase-activating protein 6                                                                                              | GUF1                     | 1,342822613 | 20109000   |
| Protein SDA1 homolog                                                                                                         | GPX4                     | 1,341381623 | 1399300000 |
| Lamin-B1                                                                                                                     | ARHGAP6                  | 1,341147754 | 227090000  |
| Deoxycytidylate deaminase                                                                                                    | SDAD1                    | 1,337560023 | 244340000  |
| TBC1 domain family member 25                                                                                                 | LMNB1                    | 1,337452688 | 3180600000 |
| Sperm-associated antigen 7                                                                                                   | DCTD                     | 1,336094595 | 21096000   |
| WW domain-containing adapter protein with coiled-coil                                                                        | TBC1D25;MG81;OATL1       | 1,335898258 | 137040000  |
| Origin recognition complex subunit 2                                                                                         | SPAG7                    | 1,335291761 | 25389000   |
| 5-AMP-activated protein kinase subunit gamma-1                                                                               | WAC                      | 1,334454275 | 462830000  |
| Glucocorticoid receptor                                                                                                      | ORC2                     | 1,333262226 | 60220000   |
| Glutamate-rich WD repeat-containing protein 1                                                                                | PRKAG1                   | 1,333120034 | 31104000   |
| rRNA-processing protein UTP23 homolog                                                                                        | NR3C1                    | 1,332906803 | 495130000  |
| Glucose 1,6-bisphosphate synthase                                                                                            | DKFZp564C172;GRWD1       | 1,332889037 | 74632000   |
| Casein kinase II subunit alpha                                                                                               | UTP23                    | 1,331203408 | 134540000  |
| Pre-mRNA-splicing regulator WTAP                                                                                             | UTP23                    | 1,331114809 | 72047000   |
| WAS protein family homolog 6;Putative WAS protein family homolog 3;WAS protein family homolog 2;WAS protein family homolog 1 | PGM2L1                   | 1,330849082 | 812390000  |
| Stromal membrane-associated protein 2                                                                                        | CSNK2A2                  | 1,330618871 | 2012400000 |
| Guanine nucleotide-binding protein-like 3-like protein                                                                       | WTAP;DKFZp686F20131      | 1,33010561  | 144510000  |
| DNA excision repair protein ERCC-1                                                                                           | SMAP2                    | 1,328921315 | 49395000   |
| Ubiquitin-associated protein 2-like                                                                                          | GNL3L                    | 1,328585853 | 315220000  |
| Nuclear transcription factor Y subunit gamma                                                                                 | ERCC1                    | 1,327457123 | 94813000   |
| Selenoprotein S                                                                                                              | UBAP2L                   | 1,326488652 | 59541000   |
| Tumor necrosis factor alpha-induced protein 8                                                                                | NFYC                     | 1,325732467 | 526550000  |
| Catenin alpha-1                                                                                                              | VIMP;SELS                | 1,324924479 | 112400000  |
| WD repeat-containing protein 48                                                                                              | TNFAIP8                  | 1,324643671 | 244690000  |
| MOB kinase activator 1A                                                                                                      | CTNNA1                   | 1,324538398 | 987690000  |
| Serine-protein kinase ATM                                                                                                    | WDR48                    | 1,323661778 | 59127000   |
| Neutrophil cytosol factor 4                                                                                                  | MOB1A                    | 1,322436457 | 759080000  |
| Prelamin-A/C;Lamin-A/C                                                                                                       | ATM;DKFZp781A0353        | 1,321999392 | 143780000  |
| Gigaxonin                                                                                                                    | NCF4                     | 1,320829481 | 114810000  |
| Survival of motor neuron-related-splicing factor 30                                                                          | LMNA                     | 1,320445782 | 4040300000 |
| Beta-arrestin-2                                                                                                              | GAN                      | 1,320166869 | 28813000   |
| Vimentin                                                                                                                     | SMNDC1                   | 1,319278618 | 2573700000 |
| Interferon regulatory factor 2-binding protein 2                                                                             | ARRB2                    | 1,318774068 | 241170000  |
| Uridine phosphorylase 1                                                                                                      | VIM                      | 1,316915783 | 7523300000 |
| Tax1-binding protein 1                                                                                                       | IRF2BP2                  | 1,316343724 | 232720000  |
| Diphthine synthase                                                                                                           | UPP1                     | 1,316343724 | 249690000  |
| Prolyl 3-hydroxylase 1                                                                                                       | TAX1BP1                  | 1,315927992 | 411140000  |
| Exosome component 10                                                                                                         | DPH5                     | 1,315599058 | 328320000  |
| Receptor-type tyrosine-protein phosphatase eta                                                                               | PREP1;DKFZp547C166       | 1,3151665   | 18465000   |
| Putative beta-actin-like protein 3                                                                                           | EXOSC10                  | 1,313404607 | 505260000  |
|                                                                                                                              | PTRPR                    | 1,313283866 | 44824000   |
|                                                                                                                              | POTEKP                   | 1,313232127 | 774470000  |

|                                                                                                                               |                               |             |            |
|-------------------------------------------------------------------------------------------------------------------------------|-------------------------------|-------------|------------|
| Zinc finger protein ZFPM1                                                                                                     | ZFPM1                         | 1,312921776 | 203840000  |
| Sulfatase-modifying factor 2                                                                                                  | SUMF2;DKFZP5661024            | 1,312577114 | 1574400000 |
| Protein FAM195B                                                                                                               | FAM195B                       | 1,311957178 | 221250000  |
| BUB3-interacting and GLEBS motif-containing protein ZNF207                                                                    | ZNF207;DKFZp761N202           | 1,311819494 | 1901000000 |
| Mothers against decapentaplegic homolog 2;Mothers against decapentaplegic homolog 3;Mothers against decapentaplegic homolog 3 | SMAD2;SMAD3;SMAD9             | 1,310684702 | 178750000  |
| Mini-chromosome maintenance complex-binding protein                                                                           | MCMBP                         | 1,310581636 | 613820000  |
| Basic leucine zipper and W2 domain-containing protein 1                                                                       | BZWI;hCG_2022736              | 1,309431838 | 8446400000 |
| Regulation of nuclear pre-mRNA domain-containing protein 2                                                                    | RPRD2                         | 1,308592216 | 20849000   |
|                                                                                                                               |                               | 1,307856293 | 69011000   |
| Roundabout homolog 4                                                                                                          | ROBO4                         | 1,307668166 | 5076700000 |
| High mobility group protein 20A                                                                                               | HMG20A                        | 1,303594009 | 66500000   |
| Low-density lipoprotein receptor-related protein 12                                                                           | LRP12                         | 1,303220257 | 46570000   |
| F-box-like/WD repeat-containing protein TBL1XR1                                                                               | TBL1XR1                       | 1,301981616 | 63923000   |
| Phospholipid scramblase 1                                                                                                     | PLSCR1                        | 1,301066875 | 1867300000 |
| Caspase-14;Caspase-14 subunit p19;Caspase-14 subunit p10                                                                      | CASP14                        | 1,300965316 | 42239000   |
| tRNA-specific adenosine deaminase 2                                                                                           | ADAT2                         | 1,300170322 | 140470000  |
| DNA topoisomerase 2-alpha                                                                                                     | TOP2A                         | 1,29947761  | 2875400000 |
| Cytochrome c oxidase subunit 6A, mitochondrial                                                                                |                               | 1,299173726 | 39265000   |
| Eukaryotic translation initiation factor 4 gamma 1                                                                            | EIF4G1                        | 1,298667567 | 415230000  |
| Geranylgeranyl pyrophosphate synthase                                                                                         | GGPS1                         | 1,298650702 | 78819000   |
| Chromobox protein homolog 5                                                                                                   | CBX5                          | 1,297706952 | 311720000  |
| EH domain-containing protein 2                                                                                                | EHD2                          | 1,297235591 | 87169000   |
| CCR4-NOT transcription complex subunit 8                                                                                      | CNOT8                         | 1,297117804 | 603510000  |
| Cyclin-C                                                                                                                      | CCNC                          | 1,296781389 | 84244000   |
| Protein bicaudal D homolog 1                                                                                                  | GLYAT;BICD1                   | 1,296209882 | 15772000   |
| Transmembrane and TPR repeat-containing protein 3                                                                             | TMTC3                         | 1,295756398 | 54422000   |
| Alpha-tocopherol transfer protein-like                                                                                        | DKFZp686E0870;TTPAL           | 1,294381092 | 218790000  |
| Uridine phosphorylase 2                                                                                                       | UPP2                          | 1,294330831 | 406630000  |
| Ras GTPase-activating protein 2                                                                                               | RASA2                         | 1,29406284  | 77774000   |
| HEAT repeat-containing protein 6                                                                                              | HEATR6                        | 1,291972972 | 91723000   |
| rRNA/tRNA 2-O-methyltransferase fibrillar-like protein 1                                                                      | FBLL1                         | 1,288493751 | 498230000  |
| Catenin alpha-2                                                                                                               | CTNNA2                        | 1,288277959 | 80028000   |
| Lethal(2) giant larvae protein homolog 1                                                                                      | LLGL1                         | 1,288194981 | 53103000   |
|                                                                                                                               | UNQ2523                       | 1,288095422 | 423010000  |
| TBC1 domain family member 5                                                                                                   | TBC1D5                        | 1,287929524 | 360570000  |
| Plexin domain-containing protein 2                                                                                            | PLXDC2                        | 1,286388721 | 244650000  |
| Aladin                                                                                                                        | AAAS                          | 1,284967169 | 38549000   |
| mRNA turnover protein 4 homolog                                                                                               | MRTO4                         | 1,284538016 | 4081900000 |
| Copper homeostasis protein cutC homolog                                                                                       | CUTC                          | 1,283812409 | 198980000  |
| Niemann-Pick C1 protein                                                                                                       | NPC1                          | 1,283730006 | 41119000   |
| SCY1-like protein 2                                                                                                           | SCYL2                         | 1,283614659 | 387500000  |
| RNA-binding protein 42                                                                                                        | RBM42                         | 1,281049436 | 71630000   |
| Ribonuclease H1                                                                                                               | RNASEH1                       | 1,280458916 | 32266000   |
| Zyxin                                                                                                                         | ZYX                           | 1,279918085 | 9448700    |
| Calcium-regulated heat stable protein 1                                                                                       | CARHSP1                       | 1,279787043 | 466170000  |
| Conserved oligomeric Golgi complex subunit 2                                                                                  | COG2                          | 1,278870502 | 99191000   |
| Interferon regulatory factor 5                                                                                                | IRF5                          | 1,276698967 | 16598000   |
| Protein LTV1 homolog                                                                                                          | LTV1                          | 1,276275318 | 51192000   |
| Leucine-rich repeat and calponin homology domain-containing protein 3                                                         | LRCH3                         | 1,275363798 | 281970000  |
| Regulator of chromosome condensation                                                                                          | RCC1                          | 1,274242463 | 3346400000 |
| Nck-associated protein 5-like                                                                                                 | NCKAP5L                       | 1,273739317 | 36277000   |
| NAD-dependent protein deacetylase sirtuin-1;SirtT1 75 kDa fragment                                                            | SIRT1                         | 1,273723093 | 126630000  |
| Nitric oxide synthase-interacting protein                                                                                     | NOSIP                         | 1,273674423 | 148590000  |
| Nuclear respiratory factor 1                                                                                                  | NRF1                          | 1,273528438 | 39766000   |
| Vitamin K epoxide reductase complex subunit 1                                                                                 | VKORC1                        | 1,2724589   | 45424000   |
| PERQ amino acid-rich with GYF domain-containing protein 1                                                                     | GYGF1                         | 1,272086604 | 21779000   |
| Ras-related protein Rab-9A                                                                                                    | RAB9A                         | 1,271779219 | 142310000  |
|                                                                                                                               | EIF3G                         | 1,271439651 | 242030000  |
| Atrophia-1                                                                                                                    | ATN1                          | 1,270664176 | 46679000   |
| Protein IMPACT                                                                                                                | IMPACT                        | 1,270034799 | 82348000   |
| Vesicle-associated membrane protein 8                                                                                         | VAMP8                         | 1,269309369 | 1477900000 |
| Crooked neck-like protein 1                                                                                                   | crn;DKFZp762M013;CRNKL1       | 1,26890671  | 67026000   |
| RanBP2-like and GRIP domain-containing protein 3;RANBP2-like and GRIP domain-containing protein 8                             | RGPD3;RGPD8                   | 1,268649142 | 172590000  |
| Disintegrin and metalloproteinase domain-containing protein 10                                                                | ADAM10                        | 1,268600086 | 576400000  |
| Nuclear transcription factor Y subunit beta                                                                                   | NFYB                          | 1,268552582 | 284390000  |
| Golgin subfamily A member 7                                                                                                   | GOLGA7                        | 1,268536489 | 396200000  |
| Zinc finger protein 706                                                                                                       | ZNF706                        | 1,268391679 | 85531000   |
| Pumilio homolog 1                                                                                                             | PUM1                          | 1,267346809 | 826320000  |
| Histone H2A.V;Histone H2A.Z;Histone H2A                                                                                       | H2AFV;H2AFZ                   | 1,26707382  | 7393400000 |
| Exosome complex component CSL4                                                                                                | EXOSC1                        | 1,266399878 | 505870000  |
| Mitochondrial import inner membrane translocase subunit Tim22                                                                 | TIMM22                        | 1,265150173 | 569350000  |
| Citron Rho-interacting kinase                                                                                                 | CIT                           | 1,265086152 | 56124000   |
| Ubiquitin-4                                                                                                                   | UBQLN4                        | 1,264830133 | 193000000  |
| N(6)-adenine-specific DNA methyltransferase 2                                                                                 | N6AMT2                        | 1,26459021  | 369940000  |
| BMP-2-inducible protein kinase                                                                                                | BMP2K                         | 1,264142595 | 44065000   |
| Crk-like protein                                                                                                              | CRKL                          | 1,262833546 | 3770300000 |
| DNA methyltransferase 1-associated protein 1                                                                                  | DMAP1                         | 1,262737868 | 45225000   |
| PERQ amino acid-rich with GYF domain-containing protein 2                                                                     | GIGYF2                        | 1,262275631 | 736740000  |
| 1-acylglycerol-3-phosphate O-acyltransferase ABHD5                                                                            | ABHD5                         | 1,261861498 | 145970000  |
| Heterogeneous nuclear ribonucleoprotein D-like                                                                                | HNRNPDL                       | 1,26146355  | 941090000  |
| Lanosterol 14-alpha demethylase                                                                                               | CYP51A1                       | 1,261399902 | 36164000   |
| AP-2 complex subunit alpha-2                                                                                                  | AP2A2                         | 1,260461833 | 33212000   |
| Cytochrome c oxidase subunit 6B1                                                                                              | COX6B1                        | 1,260398286 | 958790000  |
| DnaJ homolog subfamily C member 5                                                                                             | DNAJCS;FLJ00095               | 1,260112402 | 860260000  |
| MORC family CW-type zinc finger protein 3                                                                                     | MORC3                         | 1,258304812 | 139690000  |
| PDZ and LIM domain protein 5                                                                                                  | PDLIM5                        | 1,258130669 | 1367100000 |
| Ribosome biogenesis protein WDR12                                                                                             | WDR12                         | 1,258130669 | 1604300000 |
|                                                                                                                               | ABCE1                         | 1,25779835  | 109190000  |
| Putative GTP cyclohydrolase 1 type 2;Putative GTP cyclohydrolase 1 type 2 NIF3L1                                              | DKFZp762L015;NIF3L1           | 1,257339721 | 90402000   |
| Polypeptide N-acetylgalactosaminyltransferase 6                                                                               | GALNT6                        | 1,257244874 | 102810000  |
|                                                                                                                               |                               | 1,257197455 | 861030000  |
| SRSF protein kinase 2;SRSF protein kinase 2 N-terminal;SRSF protein kinase 2 C-terminal                                       | SRPK2                         | 1,25710263  | 70458000   |
| Elongation factor 1-alpha                                                                                                     |                               | 1,257086827 | 25263000   |
| Serine/threonine-protein kinase B-raf                                                                                         | BRAF                          | 1,25629719  | 17886000   |
| Ras-related protein Rab-11A                                                                                                   | RAB11A                        | 1,256028939 | 135250000  |
| Polyadenylate-binding protein-interacting protein 2                                                                           | PAIP2                         | 1,255855426 | 119650000  |
| Deoxyuridine 5-triphosphate nucleotidohydrolase, mitochondrial                                                                | DUT                           | 1,255792342 | 4500200000 |
| PAB-dependent poly(A)-specific ribonuclease subunit PAN2                                                                      | PAN2                          | 1,255697728 | 54439000   |
| Set1/Ash2 histone methyltransferase complex subunit ASH2                                                                      | ASH2L                         | 1,255146099 | 184780000  |
| Zinc transporter 1                                                                                                            | SLC30A1                       | 1,254594954 | 49329000   |
| Bile salt export pump                                                                                                         | ABCB11                        | 1,253117129 | 19566000   |
| Protein RRP5 homolog                                                                                                          | PDCD11                        | 1,252614833 | 21114000   |
| Transcription initiation factor IIB                                                                                           | GTF2B                         | 1,252520698 | 2457800000 |
| Transcription initiation factor TFIID subunit 4                                                                               | TAF4                          | 1,251799462 | 120830000  |
| RNA-binding protein EWS;Nuclear factor of activated T-cells, cytoplasmic 2                                                    | EWSR1;ZNF384 fusion;EWSR1;NF1 | 1,251235595 | 18373000   |
| Replication protein A 14 kDa subunit                                                                                          | RPA3                          | 1,24975005  | 271330000  |
| Porphobilinogen deaminase                                                                                                     | HMBS                          | 1,248628511 | 528570000  |
| Tyrosine-protein kinase Fes/Fps;Tyrosine-protein kinase                                                                       | FES                           | 1,248408279 | 53106000   |

|                                                                                                                            |                             |             |            |
|----------------------------------------------------------------------------------------------------------------------------|-----------------------------|-------------|------------|
| Nipped-B-like protein                                                                                                      | NIPBL                       | 1,248314775 | 763330000  |
| Tumor necrosis factor alpha-induced protein 8                                                                              | TNF- $\alpha$ IP8           | 1,247956471 | 4462100000 |
| Ubiquitin-associated protein 2-like                                                                                        | UBAP2L                      | 1,247894179 | 92751000   |
| Angio-associated migratory cell protein                                                                                    | AAMP                        | 1,247209369 | 565770000  |
| La-related protein 4B                                                                                                      | LARP4B                      | 1,246976083 | 280800000  |
| Neutrophil cytosol factor 1;Putative neutrophil cytosol factor 1B;Putative neutrophil cytosol factor 1C                    | NCF1;NCF1B;NCF1C            | 1,246913888 | 450970000  |
| DNA excision repair protein ERCC-6-like                                                                                    | ERCC6L                      | 1,246789517 | 21561000   |
| Histone chaperone ASF1B                                                                                                    | ASF1B                       | 1,246742884 | 63657000   |
| Interferon-related developmental regulator 1                                                                               | IFRD1                       | 1,24633888  | 338990000  |
| SWI/SNF-related matrix-associated actin-dependent regulator of chromatin subfamily A member 5                              | SMARCA5                     | 1,246276748 | 3616800000 |
| Transcription and mRNA export factor ENY2                                                                                  | ENY2                        | 1,245702327 | 458500000  |
| Polycomb protein SUZ12                                                                                                     | SUZ12                       | 1,245454093 | 62001000   |
| CUGBP Elav-like family member 1                                                                                            | CELF1                       | 1,245050923 | 219240000  |
| Protein IWS1 homolog                                                                                                       | IWS1                        | 1,244849435 | 275240000  |
| Ubiquitin domain-containing protein UBFD1                                                                                  | UBFD1                       | 1,244106048 | 447300000  |
| AN1-type zinc finger protein 6                                                                                             | ZFAND6                      | 1,243456311 | 128610000  |
| Cytosolic phospholipase A2;Phospholipase A2;Lysophospholipase                                                              | PLA2G4A                     | 1,243193516 | 785580000  |
| Guanine nucleotide-binding protein subunit gamma;Guanine nucleotide-binding protein G(I)/G(S)/G(O) subunit gamma-12        | GNM12                       | 1,243116244 | 206160000  |
| Transmembrane protein 214                                                                                                  | TMEM214;DKFZp761L1314       | 1,242853592 | 252920000  |
| Eukaryotic translation initiation factor 2A;Eukaryotic translation initiation factor 2A, N-terminally processed            | EIF2A                       | 1,242482978 | 1119500000 |
| Phospholipid-transporting ATPase 1A                                                                                        | ATP8A1                      | 1,242390359 | 28436000   |
| 2-oxoglutarate and iron-dependent oxygenase domain-containing protein 3                                                    | OGFOD3                      | 1,241804093 | 76251000   |
| Nuclear fragile X mental retardation-interacting protein 2                                                                 | NUFIP2                      | 1,241804093 | 167830000  |
| Ubiquitin-like protein 5                                                                                                   | UBL5                        | 1,241033533 | 408430000  |
| Bromodomain-containing protein 4                                                                                           | BRD4                        | 1,240848741 | 533360000  |
| Nuclear receptor coactivator 1                                                                                             | NCOA1                       | 1,240433159 | 96191000   |
| Metastasis-associated protein MTA2                                                                                         | MTA2                        | 1,240217782 | 3509000000 |
| DmX-like protein 2                                                                                                         | DMXL2                       | 1,240125501 | 101270000  |
| Kinesin-like protein KIF15                                                                                                 | KIF15                       | 1,239587465 | 958340000  |
| Cytochrome c oxidase subunit 7C, mitochondrial                                                                             | COX7C                       | 1,23954137  | 815800000  |
| Protein HEXIM1                                                                                                             | HEXIM1                      | 1,237394048 | 322350000  |
|                                                                                                                            | ACOT7                       | 1,236690123 | 68242000   |
| Peroxisomal biogenesis factor 19                                                                                           | PEX19                       | 1,236628949 | 781350000  |
| Ribonuclease H2 subunit B                                                                                                  | RNASEH2B                    | 1,236262038 | 927600000  |
| C-terminal-binding protein 2                                                                                               | CTBP2                       | 1,235391496 | 1017200000 |
| Nucleoporin p58/p45                                                                                                        | NUPL1                       | 1,23496431  | 575870000  |
| High affinity cationic amino acid transporter 1;Low affinity cationic amino acid transporter 2                             | SLC7A1;SLC7A2               | 1,234842311 | 711670000  |
| RNA-binding protein 39                                                                                                     | RBM39;DKFZp781C0423;DKFZp68 | 1,234308849 | 6419900000 |
| Prolyl 3-hydroxylase OGFOD1                                                                                                | OGFOD1                      | 1,233775848 | 141660000  |
| Histone-binding protein RBBP7                                                                                              | RBBP7                       | 1,233060827 | 6658200000 |
| E1A-binding protein p400                                                                                                   | EP400                       | 1,233045623 | 70438000   |
| Histone acetyltransferase p300;CREB-binding protein                                                                        | EP300;CREBBP                | 1,232270705 | 746360000  |
| Cold-inducible RNA-binding protein                                                                                         | CIRBP                       | 1,231663608 | 123870000  |
| F-box/LRR-repeat protein 15                                                                                                | FBXL15                      | 1,230420927 | 136660000  |
|                                                                                                                            | TARDBP                      | 1,230042559 | 142930000  |
| Methyl-CpG-binding domain protein 3                                                                                        | MBD3                        | 1,229906404 | 673770000  |
| Transcription factor BTF3                                                                                                  | BTF3                        | 1,229755156 | 2133400000 |
| Importin subunit alpha-3                                                                                                   | KPNA4                       | 1,228727653 | 1336800000 |
| BSD domain-containing protein 1                                                                                            | BSDC1                       | 1,226602556 | 29095000   |
| DNA-directed RNA polymerase II subunit RPB1                                                                                | POLR2A                      | 1,226467161 | 7202400000 |
| BRO1 domain-containing protein BROX                                                                                        | BROX                        | 1,225625375 | 1401700000 |
| Serine/threonine-protein phosphatase 4 regulatory subunit 2                                                                | PPP4R2                      | 1,225355047 | 95232000   |
| Protein N-terminal asparagine amidohydrolase                                                                               | NTAN1                       | 1,224994794 | 46385000   |
| Diphthine--ammonia ligase                                                                                                  | DPH6                        | 1,224619756 | 187320000  |
| Protein dpy-30 homolog                                                                                                     | DPY30;LOC84661              | 1,224140042 | 348070000  |
| G patch domain-containing protein 8                                                                                        | GPATCH8                     | 1,223795479 | 33377000   |
| Ribonuclease;Ribonuclease H2 subunit A                                                                                     | RNASEH2A;JUNB               | 1,223166779 | 681040000  |
| RNA-binding protein with multiple splicing 2                                                                               | RBPMS2                      | 1,222927444 | 215680000  |
| Heterochromatin protein 1-binding protein 3                                                                                | HP1BP3                      | 1,222912488 | 995770000  |
| ERO1-like protein beta                                                                                                     | ERO1LB                      | 1,222792859 | 116720000  |
| ATP-dependent RNA helicase DDX18                                                                                           | DDX18                       | 1,222404225 | 388080000  |
| Nucleoporin p54                                                                                                            | NUP54                       | 1,222344457 | 1046800000 |
| Cytochrome c oxidase subunit 7A-related protein, mitochondrial                                                             | COX7A2L                     | 1,222254816 | 398540000  |
| Cell division cycle protein 123 homolog                                                                                    | CDC123                      | 1,221463558 | 300780000  |
| Pumilio homolog 2                                                                                                          | PUM2                        | 1,220703125 | 248490000  |
| Protein SCAF8                                                                                                              | SCAF8;RBM16                 | 1,220390281 | 690120000  |
| E3 SUMO-protein ligase RanBP2                                                                                              | RANBP2                      | 1,219794831 | 3220500000 |
| Ras GTPase-activating protein 3                                                                                            | RASA3                       | 1,219705563 | 24411000   |
| F-box/LRR-repeat protein 20                                                                                                | FBXL20                      | 1,219021613 | 97790000   |
| Round spermatid basic protein 1-like protein                                                                               | RSBN1L                      | 1,218783897 | 124560000  |
| Monocarboxylate transporter 1                                                                                              | SLC16A1                     | 1,218769043 | 38344000   |
| Ras-related protein Rab-32                                                                                                 | RAB32                       | 1,218427497 | 409870000  |
| Serine/arginine-rich splicing factor 9                                                                                     | SRSF9                       | 1,218130657 | 363000000  |
| Microfibrillar-associated protein 1                                                                                        | MFAP1                       | 1,218115818 | 154950000  |
| Rho GTPase-activating protein 26                                                                                           | ARHGAP26                    | 1,218041633 | 296760000  |
| Probable ATP-dependent RNA helicase DHX37                                                                                  | DHX37                       | 1,217982291 | 264040000  |
| RAS protein activator like-3                                                                                               | FLJ00087;RASAL3             | 1,217168922 | 331600000  |
| COBW domain-containing protein 5;COBW domain-containing protein 1;COBW domain-containing protein 3;COBW domain-c           | CBWD3;CBWD5;CBWD2;CBWD6;C   | 1,217107665 | 156200000  |
| PEST proteolytic signal-containing nuclear protein                                                                         | PCNP                        | 1,216811467 | 3685000000 |
| Ubiquitin-conjugating enzyme E2 5                                                                                          | UBE2S                       | 1,21618992  | 842830000  |
| Thioredoxin reductase 2, mitochondrial                                                                                     | TXNRD2                      | 1,215997665 | 27414000   |
| Pumilio domain-containing protein KIAA0020                                                                                 | KIAA0020                    | 1,215849818 | 31322000   |
| Growth factor receptor-bound protein 7                                                                                     | GRB7                        | 1,215820253 | 12801000   |
| Nucleolar protein 58                                                                                                       | NOP58                       | 1,215687228 | 1532300000 |
| NADH dehydrogenase [ubiquinone] 1 alpha subcomplex assembly factor 5                                                       | NDUFAF5                     | 1,215170185 | 20444000   |
| WD repeat and HMG-box DNA-binding protein 1                                                                                | WDHD1                       | 1,215170185 | 392740000  |
| Estradiol 17-beta-dehydrogenase 11                                                                                         | HSD17B11                    | 1,214624074 | 403100000  |
| Cyclin-G-associated kinase                                                                                                 | GAK                         | 1,214063714 | 458050000  |
| DNA topoisomerase 1                                                                                                        | TOP1                        | 1,213768995 | 4406800000 |
| DNA-directed RNA polymerase II subunit RPB4                                                                                | POLR2D                      | 1,213680608 | 654940000  |
| Endothelial differentiation-related factor 1                                                                               | EDF1                        | 1,213415522 | 3542700000 |
| Histone H4                                                                                                                 | HIST1H4H;HIST1H4A           | 1,21297397  | 2.6944E+11 |
| Coiled-coil domain-containing protein 12                                                                                   | CCDC12                      | 1,212709192 | 212350000  |
| Quinone oxidoreductase                                                                                                     | CRYZ                        | 1,212268154 | 1050100000 |
| Tropomodulin-3                                                                                                             | DKFZp686E1899;TMOD3         | 1,211783382 | 4031100000 |
| RNA-binding motif, single-stranded-interacting protein 1;RNA-binding motif, single-stranded-interacting protein 3          | RBMS1;RBMS3                 | 1,211269653 | 275330000  |
| Phosphorylated adapter RNA export protein                                                                                  | PHAX                        | 1,210360687 | 658380000  |
| DNA replication complex GINS protein PSF1                                                                                  | GINS1                       | 1,210067764 | 212750000  |
| E3 ubiquitin-protein ligase KCMF1                                                                                          | KCMF1                       | 1,209467713 | 193500000  |
| Guanine nucleotide-binding protein G(s) subunit alpha isoforms short;Guanine nucleotide-binding protein G(s) subunit alpha | GNAS;GSA                    | 1,209438458 | 1213900000 |
| Casein kinase II subunit beta                                                                                              | CSNK2B;CSNK2B-LY6G5B-1181;C | 1,208999794 | 4704700000 |
| Fibronectin type III domain-containing protein 3B                                                                          | FNDC3B                      | 1,208663701 | 15657000   |
| PHD finger protein 6                                                                                                       | PHF6                        | 1,208269396 | 65856000   |
| Rab5 GDP/GTP exchange factor                                                                                               | RABGEF1                     | 1,20783158  | 53746000   |
| Serine/threonine-protein kinase Nek6                                                                                       | NEK6                        | 1,207627374 | 1454800000 |
| Chromosome-associated kinesin KIF4A                                                                                        | KIF4A                       | 1,207496136 | 679450000  |
| Replication protein A 70 kDa DNA-binding subunit;Replication protein A 70 kDa DNA-binding subunit, N-terminally processed  | RPA1                        | 1,206913199 | 1180600000 |
| Hydroxymethylglutaryl-CoA synthase, cytoplasmic                                                                            | HMGCS1                      | 1,206039848 | 319070000  |

|                                                                                                                       |                             |             |             |
|-----------------------------------------------------------------------------------------------------------------------|-----------------------------|-------------|-------------|
| Exosome complex component RRP43                                                                                       | EXOSC8;DKFZp564C0482        | 1,205865329 | 833840000   |
| D-tyrosyl-tRNA(Tyr) deacylase;D-tyrosyl-tRNA(Tyr) deacylase 1                                                         | DTD1                        | 1,205603646 | 1235300000  |
| Transcription initiation factor TFIID subunit 1;Transcription initiation factor TFIID subunit 1-like                  | TAF1;TAF1L                  | 1,205269438 | 714720000   |
| Alpha-taxilin                                                                                                         | TXLNA                       | 1,204659623 | 370530000   |
| Molybdopterin synthase sulfur carrier subunit                                                                         | MOC52                       | 1,204616089 | 366030000   |
| Retinal rod rhodopsin-sensitive cGMP 3,5-cyclic phosphodiesterase subunit delta                                       | PDE6D                       | 1,204456489 | 248670000   |
| Secernin-3                                                                                                            | SCRN3                       | 1,204456489 | 210240000   |
|                                                                                                                       | TARDBP                      | 1,204224419 | 974060000   |
| CCR4-NOT transcription complex subunit 2                                                                              | CNOT2                       | 1,204137416 | 171440000   |
| Transcription factor E2F4                                                                                             | E2F4                        | 1,204122917 | 150470000   |
| 1,4-alpha-glucan-branching enzyme                                                                                     | GBE1                        | 1,203760548 | 183390000   |
| WAS/WASL-interacting protein family member 1                                                                          | WIPF1;WASP1P                | 1,203354954 | 689700000   |
| Cell division control protein 42 homolog                                                                              | CDC42                       | 1,203152259 | 182430000   |
| Cytochrome c oxidase subunit 5A, mitochondrial                                                                        | COX5A                       | 1,201720864 | 3349500000  |
| Calcium-binding protein 39-like                                                                                       | CAB39L                      | 1,201677542 | 469560000   |
| Ankyrin repeat and KH domain-containing protein 1                                                                     | ANKHD1;FLJ00246             | 1,201663102 | 611320000   |
| Chromobox protein homolog 1                                                                                           | CBX1                        | 1,201460977 | 328950000   |
| Cold shock domain-containing protein E1                                                                               | CSDE1;UNR                   | 1,201129061 | 6071700000  |
| Paxillin                                                                                                              | PXN                         | 1,201100208 | 878190000   |
| DNA replication complex GINS protein SLD5;DNA replication complex GINS protein SLD5, N-terminally processed           | GINS4                       | 1,200912694 | 107920000   |
| Glutaminase kidney isoform, mitochondrial                                                                             | GLS                         | 1,200696404 | 2601900000  |
| Lysine-specific histone demethylase 1A                                                                                | KDM1A                       | 1,200624325 | 2564200000  |
| Transcription initiation factor TFIID subunit 6                                                                       | TAF6                        | 1,1999904   | 792180000   |
| Protein CDV3 homolog                                                                                                  | CDV3                        | 1,199673689 | 4919000000  |
| UPF0609 protein C4orf27;Putative UPF0609 protein C4orf27-like                                                         | C4orf27                     | 1,199558562 | 1326400000  |
| Nuclear inhibitor of protein phosphatase 1;Activator of RNA decay                                                     | PPP1R8                      | 1,199529784 | 2323100000  |
| Cytoplasmic dynein 1 light intermediate chain 2                                                                       | DYNC1L12;DKFZp686J08252     | 1,199170174 | 650020000   |
| E2/E3 hybrid ubiquitin-protein ligase UBE2O                                                                           | UBE2O                       | 1,199112657 | 1830900000  |
| Protein farnesyltransferase subunit beta                                                                              | FNTB                        | 1,19881078  | 362380000   |
| Sideroflexin-1                                                                                                        | SFXN1                       | 1,198509055 | 670680000   |
| 39S ribosomal protein L4, mitochondrial                                                                               | MRPL4                       | 1,197475721 | 607230000   |
| Adenylosuccinate synthetase isozyme 2                                                                                 | ADSS                        | 1,19734668  | 10477000000 |
| Ribonucleoprotein PTB-binding 1                                                                                       | RAVER1                      | 1,197246333 | 1355000000  |
| High mobility group protein B3                                                                                        | HMG3;DKFZp779G118           | 1,197060021 | 7314700000  |
| N-alpha-acetyltransferase 40                                                                                          | NAA40                       | 1,196845116 | 653620000   |
| G-rich sequence factor 1                                                                                              | GRSF1                       | 1,196730532 | 431090000   |
| PDZ domain-containing protein GIPC1                                                                                   | GIPC1                       | 1,196716211 | 1253600000  |
| Dual specificity mitogen-activated protein kinase kinase 3                                                            | MAP2K3                      | 1,196530063 | 166990000   |
| Ras GTPase-activating protein-binding protein 2                                                                       | G3BP2                       | 1,196515746 | 133790000   |
| Calcium signal-modulating cyclophilin ligand                                                                          | CAMLG                       | 1,195914755 | 730560000   |
| Intersectin-2                                                                                                         | ITSN2                       | 1,195200076 | 959110000   |
| Steroid receptor RNA activator 1                                                                                      | SRA1                        | 1,19450052  | 404320000   |
| DCN1-like protein;DCN1-like protein 5                                                                                 | DCUN1D5                     | 1,194414916 | 464860000   |
| Friend leukemia integration 1 transcription factor                                                                    | FLI1                        | 1,194386384 | 109560000   |
| YTH domain-containing family protein 2                                                                                | YTHDF2                      | 1,193288943 | 746990000   |
| Proteasome subunit beta type-5                                                                                        | PSMB5                       | 1,193004223 | 8428100000  |
| Clustered mitochondria protein homolog                                                                                | CLUH                        | 1,192790773 | 7042000000  |
| Uncharacterized protein CXorf38                                                                                       | CXorf38                     | 1,192776545 | 278000000   |
| Nuclear pore glycoprotein p62                                                                                         | NUP62                       | 1,192264587 | 1371700000  |
| YTH domain-containing family protein 3                                                                                | YTHDF3;DKFZp451J085;DKFZp45 | 1,192122455 | 992020000   |
| FH1/FH2 domain-containing protein 1                                                                                   | FHD1                        | 1,191809882 | 108880000   |
| Histone-binding protein RBBP4                                                                                         | RBBP4                       | 1,191738866 | 3527200000  |
| Syntaxin-binding protein 1                                                                                            | stxbp1;STXBP1               | 1,191724664 | 630860000   |
| Chromobox protein homolog 3                                                                                           | CBX3                        | 1,191483278 | 9762900000  |
| Protein C8orf37                                                                                                       | C8orf37                     | 1,191043354 | 167610000   |
| RNA-binding protein with multiple splicing                                                                            | RBPMS;hCG_2043421           | 1,190773884 | 2270600000  |
| Ubiquitin-conjugating enzyme E2 J1                                                                                    | UBE2J1                      | 1,19023531  | 1421700000  |
| Peptidyl-prolyl cis-trans isomerase D                                                                                 | PPID                        | 1,19023531  | 13895000000 |
| Palmitoyl-protein thioesterase 1                                                                                      | PPT1                        | 1,189980365 | 598910000   |
| Neutrophil cytosol factor 2                                                                                           | NCF2                        | 1,189470804 | 735050000   |
| Nuclear RNA export factor 1                                                                                           | NXF1;DKFZp667O0311          | 1,189329337 | 300910000   |
| Exosome complex component RRP45                                                                                       | EXOSC9                      | 1,189315192 | 441100000   |
| DnaJ homolog subfamily B member 12                                                                                    | DNAJB12                     | 1,189117199 | 442230000   |
| mRNA export factor                                                                                                    | RAE1                        | 1,18908892  | 2938200000  |
| WD repeat domain phosphoinositide-interacting protein 4                                                               | WDR45                       | 1,188947544 | 158690000   |
| Probable ATP-dependent RNA helicase DDX6                                                                              | DDX6                        | 1,188495365 | 7772800000  |
| WD repeat-containing protein 5                                                                                        | WDR5                        | 1,188368252 | 6267000000  |
| Tyrosine-protein phosphatase non-receptor type 12                                                                     | PTPN12                      | 1,188340008 | 779600000   |
| Nuclear pore complex protein Nup205                                                                                   | NUP205                      | 1,188311765 | 5219600000  |
|                                                                                                                       |                             | 1,187916513 | 54556000000 |
| NEDD8 ultimate buster 1                                                                                               | NUB1                        | 1,187733093 | 298270000   |
| Anaphase-promoting complex subunit 7                                                                                  | ANAPC7                      | 1,187394619 | 329190000   |
| DNA-directed RNA polymerases I and III subunit RPAC1                                                                  | POLR1C                      | 1,187338225 | 834070000   |
| Atlastin-2                                                                                                            | ATL2                        | 1,187324128 | 170410000   |
| Gelsolin                                                                                                              | GSN                         | 1,186887269 | 683340000   |
| Solute carrier family 25 member 36                                                                                    | SLC25A36                    | 1,186633757 | 355000000   |
| Methionine-R-sulfoxide reductase B2, mitochondrial                                                                    | MSRB2                       | 1,186450733 | 858340000   |
| Ran-binding protein 9                                                                                                 | RANBP9                      | 1,186450733 | 663540000   |
| Putative RNA-binding protein Luc7-like 1                                                                              | LUC7L                       | 1,186436656 | 964820000   |
| Homeobox protein cut-like 1                                                                                           | CUX1                        | 1,186366279 | 480620000   |
| DNA polymerase alpha subunit B                                                                                        | POLA2                       | 1,186324056 | 219160000   |
| Cytosolic Fe-S cluster assembly factor NUBP1                                                                          | NUBP1                       | 1,186183336 | 502160000   |
| Mevalonate kinase                                                                                                     | MVK                         | 1,185916061 | 332840000   |
| Spectrin beta chain, non-erythrocytic 1                                                                               | SPTBN1                      | 1,185733257 | 100080000   |
| Zinc finger protein 593                                                                                               | ZNF593                      | 1,185311618 | 105230000   |
| Serine-threonine kinase receptor-associated protein                                                                   | STRAP                       | 1,184918359 | 23076000000 |
| Protein cornichon homolog 1                                                                                           | CNIH1;CNIH                  | 1,184707792 | 169600000   |
| E3 ubiquitin-protein ligase;E3 ubiquitin-protein ligase Itchy homolog                                                 | ITCH                        | 1,184413123 | 186160000   |
| Digestive organ expansion factor homolog                                                                              | DIEXF                       | 1,184090559 | 170150000   |
| Neurochondrin                                                                                                         | NCDN                        | 1,183922335 | 805360000   |
| T-complex protein 1 subunit zeta-2                                                                                    | CTTB6                       | 1,183754158 | 823480000   |
| ATP-dependent RNA helicase DDX55                                                                                      | DDX55                       | 1,18357202  | 147570000   |
| Cullin-4B                                                                                                             | CUL4B                       | 1,183544004 | 1610700000  |
| RRP12-like protein                                                                                                    | RRP12                       | 1,183249914 | 2454400000  |
| Dual adapter for phosphotyrosine and 3-phosphotyrosine and 3-phosphoinositide                                         | DAPP1                       | 1,183137918 | 215730000   |
| Protein NEDD1                                                                                                         | NEDD1                       | 1,182858022 | 251550000   |
| Mitogen-activated protein kinase 8                                                                                    | MAPK8                       | 1,182228738 | 425820000   |
| Protein FAM188A                                                                                                       | FAM188A                     | 1,181851489 | 389620000   |
| Protein arginine N-methyltransferase 3                                                                                | PRMT3                       | 1,181809587 | 596950000   |
| Nuclear receptor-binding protein                                                                                      | NRBP1                       | 1,181460521 | 661310000   |
| LIM and SH3 domain protein 1                                                                                          | LASP1                       | 1,181083762 | 4845200000  |
| Protein zyg-11 homolog B                                                                                              | ZYG11B                      | 1,181041915 | 170770000   |
| Uncharacterized protein C9orf78                                                                                       | C9orf78                     | 1,180679363 | 619100000   |
| S1 RNA-binding domain-containing protein 1                                                                            | SRBD1                       | 1,180219521 | 122710000   |
| Synaptic vesicular amine transporter                                                                                  | SLC18A2                     | 1,180094172 | 1331200000  |
| Nascent polypeptide-associated complex subunit alpha;Nascent polypeptide-associated complex subunit alpha, muscle-spe | NACA                        | 1,179927081 | 4003300000  |
| Sorting nexin-1                                                                                                       | SNX1                        | 1,179843553 | 1035600000  |
| TBC1 domain family member 17                                                                                          | TBC1D17                     | 1,179815713 | 425820000   |

|                                                                                                                           |                              |             |            |
|---------------------------------------------------------------------------------------------------------------------------|------------------------------|-------------|------------|
| Maspardin                                                                                                                 |                              |             |            |
| Importin subunit alpha-4;Importin subunit alpha                                                                           | SPG21                        | 1,179787874 | 430130000  |
| YTH domain-containing family protein 1                                                                                    | KPNA3                        | 1,179773955 | 391470000  |
| Histone H2A;Histone H2A type 1-C;Histone H2A type 3;Histone H2A type 1-B/E                                                | YTHDF1                       | 1,178897731 | 291440000  |
| Protein-tyrosine kinase 2-beta                                                                                            | HIST1H2AB;HIST1H2AC;HIST3H2H | 1,178772662 | 2,3305E+11 |
| Thymidylate synthase                                                                                                      | PTK2B                        | 1,178592054 | 894920000  |
| Pleckstrin homology domain-containing family F member 2                                                                   | TYMS                         | 1,178592054 | 201670000  |
| Histone acetyltransferase type B catalytic subunit                                                                        | PLEKHF2                      | 1,178453162 | 334710000  |
| Geranylgeranyl transferase type-2 subunit beta                                                                            | HAT1                         | 1,178244886 | 107560000  |
| E3 ubiquitin-protein ligase HECTD1                                                                                        | RABGGTB                      | 1,177648236 | 696750000  |
| Protein ENL                                                                                                               | HECTD1                       | 1,177634368 | 235430000  |
|                                                                                                                           | MLLT1                        | 1,177578898 | 688670000  |
|                                                                                                                           |                              | 1,177578898 | 252340000  |
| Ataxin-2-like protein                                                                                                     | ATXN2L                       | 1,177426381 | 572000000  |
| Microtubule-associated protein RP/EB family member 1                                                                      | MAPRE1                       | 1,177121467 | 883130000  |
| Cell division cycle protein 27 homolog                                                                                    | CDC27                        | 1,177038336 | 650470000  |
| DNA-directed RNA polymerase II subunit RPB9                                                                               | POLR2I                       | 1,176982922 | 204290000  |
| Adaptin ear-binding coat-associated protein 2                                                                             | NECAP2                       | 1,176733623 | 820590000  |
| POTE ankyrin domain family member E;POTE ankyrin domain family member F                                                   | POTEE;POTEF                  | 1,176581325 | 3709000000 |
| REST corepressor 1                                                                                                        | RCOR1                        | 1,176304522 | 152090000  |
| E3 ubiquitin-protein ligase TRIM33                                                                                        | TRIM33                       | 1,175986359 | 232110000  |
| CWF19-like protein 1                                                                                                      | CWF19L1                      | 1,17568219  | 668010000  |
| Splicing factor 1                                                                                                         | SF1                          | 1,175391993 | 608540000  |
| RNA-binding protein 28                                                                                                    | RBM28                        | 1,175226231 | 738020000  |
| UPF0469 protein KIAA0907                                                                                                  | KIAA0907                     | 1,174977675 | 206050000  |
| Mitotic checkpoint protein BUB3                                                                                           | BUB3                         | 1,173915595 | 1460200000 |
| Ribonuclease P/MRP protein subunit POP5                                                                                   | POP5                         | 1,173832917 | 487250000  |
| Phosducin-like protein 3                                                                                                  | PDCL3                        | 1,173653819 | 901170000  |
| Protein canopy homolog 3                                                                                                  | CNPY3                        | 1,173405928 | 828040000  |
| Thioredoxin-like protein 4A                                                                                               | TXNL4A                       | 1,173158142 | 198570000  |
| E3 ubiquitin-protein ligase CBL                                                                                           | CBL                          | 1,17286919  | 561920000  |
| Ubiquitin carboxyl-terminal hydrolase 15                                                                                  | USP15                        | 1,172827923 | 256410000  |
| NHP2-like protein 1;NHP2-like protein 1, N-terminally processed                                                           | NHP2L1                       | 1,172704138 | 265660000  |
| E3 ubiquitin-protein ligase RING2                                                                                         | RNF2                         | 1,172291713 | 135050000  |
| ATP-dependent RNA helicase DDX25                                                                                          | DDX25                        | 1,172223004 | 396290000  |
| Chromodomain-helicase-DNA-binding protein 8                                                                               | CHD8                         | 1,172085609 | 685030000  |
| cAMP-regulated phosphoprotein 19                                                                                          | ARPP19                       | 1,17183838  | 156270000  |
| Hepato-ma-derived growth factor                                                                                           | HDGF                         | 1,17183838  | 1645700000 |
| rRNA 2-O-methyltransferase fibrillarin                                                                                    | FBL                          | 1,171701076 | 639290000  |
| Annexin;Annexin A1                                                                                                        | ANXA1                        | 1,171659891 | 1084500000 |
| Myomegalin                                                                                                                | PDE4DIP                      | 1,171495179 | 921840000  |
| Exportin-5                                                                                                                | XPO5                         | 1,171495179 | 2431900000 |
| Poly [ADP-ribose] polymerase 2                                                                                            | PARP2                        | 1,171481455 | 199080000  |
| Ubiquitin-conjugating enzyme E2 D3;Ubiquitin-conjugating enzyme E2 D2                                                     | UBE2D3;UBE2D2                | 1,171303075 | 1080700000 |
| Cyclin-H                                                                                                                  | CCNH                         | 1,170507883 | 285380000  |
| Endoplasmic reticulum resident protein 29                                                                                 | ERP29                        | 1,170480482 | 593610000  |
| Vacuolar protein sorting-associated protein 37B                                                                           | VPS37B                       | 1,170165461 | 545940000  |
| Nucleolysin TIAR                                                                                                          | TIAR1                        | 1,169891668 | 326590000  |
| Proteinase-activated receptor 1                                                                                           | thrombin receptor;F2R        | 1,169727454 | 509850000  |
| Recombining binding protein suppressor of hairless                                                                        | RBPJ                         | 1,169508572 | 401910000  |
| Replication factor C subunit 4                                                                                            | RFC4                         | 1,169399163 | 288950000  |
| Cation-dependent mannose-6-phosphate receptor                                                                             | M6PR                         | 1,169371813 | 726700000  |
| Poly(A) polymerase alpha                                                                                                  | PAPOLA                       | 1,169371813 | 148040000  |
| RNA-binding protein 27                                                                                                    | RBM27;POU4F3                 | 1,169276101 | 949320000  |
| Striatin-4                                                                                                                | STRN4                        | 1,169071056 | 207600000  |
| GDP-fucose protein O-fucosyltransferase 1                                                                                 | POFUT1                       | 1,168647524 | 928330000  |
| Carnitine O-acetyltransferase                                                                                             | CRAT                         | 1,168156066 | 141200000  |
| Ribosomal RNA small subunit methyltransferase NEP1                                                                        | EMG1                         | 1,168074196 | 107510000  |
| DNA-directed RNA polymerase;DNA-directed RNA polymerase I subunit RPA1                                                    | POLR1A                       | 1,167985054 | 791910000  |
| Protein farnesyltransferase/geranylgeranyltransferase type-1 subunit alpha                                                | FNTA                         | 1,167583219 | 113500000  |
| Putative RNA-binding protein 3                                                                                            | RBM3                         | 1,16746054  | 243870000  |
| SAP30-binding protein                                                                                                     | SAP30BP                      | 1,167419652 | 296590000  |
| Mortality factor 4-like protein 2                                                                                         | MORF4L2                      | 1,167024554 | 569010000  |
| Exosome complex component RRP4                                                                                            | EXOSC2                       | 1,166194358 | 205220000  |
| Probable ATP-dependent RNA helicase DDX47                                                                                 | DDX47;E4-DBP                 | 1,16603118  | 919810000  |
| Serine/threonine-protein phosphatase 2A 65 kDa regulatory subunit A beta isoform                                          | PPP2R1B                      | 1,16603118  | 130150000  |
| Dual specificity protein phosphatase 3                                                                                    | DUSP3                        | 1,165990392 | 177100000  |
| Mediator of RNA polymerase II transcription subunit 11                                                                    | MED11                        | 1,165963202 | 853890000  |
| SEC14-like protein 2                                                                                                      | SEC14L2                      | 1,165650608 | 548880000  |
| Minor histocompatibility protein HA-1;Minor histocompatibility antigen HA-1                                               | HMHA1                        | 1,16493092  | 120480000  |
| Toll-interacting protein                                                                                                  | TOLLIP                       | 1,164768095 | 145160000  |
| Girdin                                                                                                                    | KIAA1212;CCDC88A             | 1,164008846 | 909120000  |
| Small ubiquitin-related modifier 3                                                                                        | SUMO3                        | 1,163521281 | 554670000  |
| Serine/threonine-protein kinase Nek7                                                                                      | NEK7                         | 1,163345316 | 317970000  |
| Phosphatidylinositol 4,5-bisphosphate 3-kinase catalytic subunit beta isoform                                             | PIK3CB;DKFzP779K1237         | 1,163264119 | 324840000  |
| Y-box-binding protein 3                                                                                                   | YBX3                         | 1,163209994 | 961740000  |
| SAM domain-containing protein SAMSN-1                                                                                     | SAMSN1                       | 1,162993545 | 171070000  |
| Calcium-binding protein 39                                                                                                | CAB39                        | 1,162885351 | 1966000000 |
| Exportin-6                                                                                                                | XPO6                         | 1,162547374 | 74650000   |
| Arf-GAP domain and FG repeat-containing protein 1                                                                         | AGFG1                        | 1,162236608 | 245320000  |
| Ubiquitin carboxyl-terminal hydrolase 46;Ubiquitin carboxyl-terminal hydrolase 12                                         | USP46;USP12                  | 1,161264485 | 101330000  |
| AP2-associated protein kinase 1                                                                                           | AAK1                         | 1,161089566 | 131480000  |
| Beta-actin-like protein 2                                                                                                 | ACTBL2                       | 1,160954769 | 213750000  |
| Torsin-1B                                                                                                                 | TOR1B                        | 1,160766106 | 447810000  |
| Nucleoporin Nup37                                                                                                         | NUP37                        | 1,160671797 | 499120000  |
| Peptidyl-prolyl cis-trans isomerase E;Peptidyl-prolyl cis-trans isomerase                                                 | PPIE                         | 1,160671797 | 177340000  |
| Transcription initiation factor TFIID subunit 9;Transcription initiation factor TFIID subunit 9B                          | AK6;TAF9;TAF9B               | 1,160456291 | 496370000  |
| Probable dimethyladenosine transferase                                                                                    | DIMT1                        | 1,159541285 | 853560000  |
| Ornithine aminotransferase, mitochondrial;Ornithine aminotransferase, hepatic form;Ornithine aminotransferase, renal form | OAT                          | 1,159433733 | 405720000  |
| Small ubiquitin-related modifier 1                                                                                        | SUMO1                        | 1,158667995 | 583450000  |
| Transcription factor jun-D                                                                                                | JUND                         | 1,158660074 | 165890000  |
| SURP and G-patch domain-containing protein 1                                                                              | SF4;SUGP1                    | 1,15858745  | 204580000  |
| Phosphomannomutase 1                                                                                                      | PMM1                         | 1,15858745  | 423790000  |
| Hematological and neurological expressed 1-like protein                                                                   | HN1L                         | 1,158560604 | 837660000  |
| tRNA (guanine-N(7)-)-methyltransferase                                                                                    | METTL1                       | 1,158399555 | 687980000  |
| DENN domain-containing protein 4B                                                                                         | DENN4B                       | 1,158225136 | 169470000  |
| DNA helicase B                                                                                                            | HELB                         | 1,15776921  | 139270000  |
| Putative Polycomb group protein ASXL1                                                                                     | ASXL1;ASXH1                  | 1,157648584 | 320540000  |
| Integrator complex subunit 12                                                                                             | INTS12                       | 1,157541382 | 409900000  |
| Serine/threonine-protein phosphatase 4 catalytic subunit;Serine/threonine-protein phosphatase                             | PPP4C                        | 1,157085995 | 310780000  |
| Torsin-1A                                                                                                                 | TOR1A                        | 1,156430331 | 111770000  |
| DNA replication complex GINS protein PSF2                                                                                 | GINS2                        | 1,15593573  | 221510000  |
| Replication factor C subunit 3                                                                                            | RFC3                         | 1,155895646 | 272950000  |
| DNA-directed RNA polymerase;DNA-directed RNA polymerase I subunit RPA2                                                    | POLR1B                       | 1,155882285 | 415660000  |
| DnaJ homolog subfamily B member 6                                                                                         | DNAJB6                       | 1,155615134 | 456830000  |
| H/ACA ribonucleoprotein complex subunit 1                                                                                 | GAR1                         | 1,155508308 | 123270000  |
| N-alpha-acetyltransferase 20                                                                                              | NAA20                        | 1,155294716 | 105250000  |
| Splicing regulatory glutamine/lysine-rich protein 1                                                                       | SREK1                        | 1,15506786  | 787420000  |
| Lactoylglutathione lyase                                                                                                  | GLO1                         | 1,15478775  | 204670000  |

|                                                                                                                     |                                |             |             |
|---------------------------------------------------------------------------------------------------------------------|--------------------------------|-------------|-------------|
| Neuropathy target esterase                                                                                          | PNPLA6                         | 1,154774415 | 64346000    |
| Ubiquitin-conjugating enzyme E2 A                                                                                   | UBE2A                          | 1,154361177 | 458950000   |
| Cyclin-dependent kinase 17                                                                                          | CDK17                          | 1,154134688 | 32043000    |
| ADP-ribosylation factor GTPase-activating protein 2                                                                 | ARFGAP2                        | 1,153788464 | 569450000   |
| Pleckstrin homology domain-containing family A member 2                                                             | PLEKHA2                        | 1,153748529 | 63104000    |
| Protein NDRG3                                                                                                       | NDRG3                          | 1,153708596 | 778760000   |
| Twinfilin-2                                                                                                         | TWF2                           | 1,152817486 | 5084500000  |
| Polypyrimidine tract-binding protein 3                                                                              | PTBP3                          | 1,152764329 | 361960000   |
| Calcyclin-binding protein                                                                                           | CACYBP                         | 1,152658029 | 13845000000 |
| Gamma-adducin                                                                                                       | ADD3                           | 1,152166649 | 577990000   |
| RNA-binding protein FUS                                                                                             | FUS                            | 1,151980831 | 4415100000  |
| Probable ATP-dependent RNA helicase DDX5                                                                            | DDX5;DKFZp686J01190            | 1,151887944 | 19032000000 |
| M-phase phosphoprotein 6                                                                                            | MPHOSPH6                       | 1,151635899 | 168610000   |
| Protein FAM83H                                                                                                      | FAM83H                         | 1,151277918 | 58585000    |
| Selenoprotein T                                                                                                     | SELT                           | 1,151277918 | 654460000   |
| Putative pre-mRNA-splicing factor ATP-dependent RNA helicase DHX15                                                  | DHX15                          | 1,151118888 | 21865000000 |
| Ubiquitin-conjugating enzyme E2 K                                                                                   | UBE2K;HIP2                     | 1,150734744 | 14626000000 |
| Far upstream element-binding protein 3                                                                              | FUBP3                          | 1,150443496 | 1541800000  |
| Tubulin beta-3 chain                                                                                                | TUBB3                          | 1,150390558 | 286990000   |
| Alpha-mannosidase 2x                                                                                                | MAN2A2                         | 1,150152395 | 811170000   |
| Proteasome inhibitor PI31 subunit                                                                                   | PSMF1                          | 1,149729239 | 514040000   |
| tRNA (adenine(58)-N(1))-methyltransferase catalytic subunit TRMT61A                                                 | TRMT61A                        | 1,149663149 | 1478700000  |
| Suppressor of IKBKE 1                                                                                               | SIKE1                          | 1,149002666 | 80427000    |
| Nuclear pore complex protein Nup85                                                                                  | NUP85                          | 1,148791471 | 109220000   |
| ATP-dependent RNA helicase DDX3X;ATP-dependent RNA helicase DDX3Y                                                   | DDX3X;DDX3Y                    | 1,148567162 | 20990000000 |
| GPN-loop GTPase 1                                                                                                   | GPN1;MBDin                     | 1,148448446 | 58989000    |
| Golgi to ER traffic protein 4 homolog                                                                               | GET4                           | 1,148382503 | 449030000   |
| Protein tyrosine phosphatase type IVA 2                                                                             | PTP4A2                         | 1,148382503 | 524090000   |
| Phosphofurin acidic cluster sorting protein 2                                                                       | PACS2                          | 1,147855232 | 199970000   |
| Ubiquitin carboxyl-terminal hydrolase 48                                                                            | USP48                          | 1,147381103 | 219070000   |
| Serine/threonine-protein kinase 38                                                                                  | STK38                          | 1,147328446 | 423160000   |
| BAG family molecular chaperone regulator 5                                                                          | BAG5                           | 1,147209985 | 83735000    |
|                                                                                                                     | RPL10                          | 1,147052076 | 2136700000  |
| High mobility group protein HMG-I/HMG-Y                                                                             | HMGAI                          | 1,147012606 | 1511000000  |
| Mitotic spindle assembly checkpoint protein MAD2A                                                                   | MAD2L1                         | 1,146828446 | 2429500000  |
| Kinesin-associated protein 3                                                                                        | KIFAP3                         | 1,146552317 | 14776000    |
| Cytohesin-1;Cytohesin-2;Cytohesin-3                                                                                 | CYTH3;PSCD2L;CYTH1;CYTH2       | 1,146499736 | 78084000    |
| Exosome complex component RRP46                                                                                     | EXOSC5                         | 1,146394589 | 740020000   |
|                                                                                                                     |                                | 1,146263182 | 63311000    |
| Alpha-actinin-1                                                                                                     | ACTN1                          | 1,146210628 | 27570000000 |
| Eukaryotic initiation factor 4A-I                                                                                   | EIF4A1                         | 1,145803495 | 1,9271E+11  |
| Vinculin                                                                                                            | VCL                            | 1,145750982 | 26510000000 |
| Splicing factor, suppressor of white-apricot homolog                                                                | SFSWAP                         | 1,145475372 | 167530000   |
| Erythroid differentiation-related factor 1                                                                          | EDRF1                          | 1,145449131 | 25129000    |
| Serine/threonine-protein phosphatase 6 regulatory ankyrin repeat subunit C                                          | ANKRD52                        | 1,145331058 | 42812000    |
| Cyclin-dependent kinase 9                                                                                           | CDK9                           | 1,145094986 | 1946100000  |
|                                                                                                                     | AARSD1                         | 1,144990096 | 200280000   |
| Mediator of RNA polymerase II transcription subunit 19                                                              | MED19;MED19AS                  | 1,144885225 | 907440000   |
| Histone H2B;Histone H2B type 1-C/E/F/G/I;Histone H2B type F-S;Histone H2B type 1-K;Histone H2B type 1-L;Histone H2B | HIST1H2BC;H2BFS;HIST1H2BK;HI   | 1,144714852 | 2,5745E+11  |
| Integrin-linked protein kinase                                                                                      | ILK                            | 1,144295686 | 1029400000  |
| Zinc finger RNA-binding protein                                                                                     | ZFR                            | 1,143811408 | 944720000   |
| Tubulin-folding cofactor B                                                                                          | TBCB                           | 1,143759079 | 519710000   |
| CDP-diacylglycerol-glycerol-3-phosphate 3-phosphatidyltransferase, mitochondrial                                    | PGS1                           | 1,143589904 | 74866000    |
| Glutathione synthetase                                                                                              | GSS                            | 1,143523654 | 578200000   |
| Switch-associated protein 70                                                                                        | SWAP70                         | 1,143484426 | 667460000   |
| Protein syndesmos                                                                                                   | NUDT16L1                       | 1,143118427 | 778320000   |
| Phosphatidylinositol 5-phosphate 4-kinase type-2 alpha                                                              | PIP4K2A                        | 1,142883266 | 677150000   |
| Methyltransferase-like protein 17, mitochondrial                                                                    | METTL17                        | 1,142517652 | 1199900000  |
| Nucleoporin Nup43                                                                                                   | NUP43                          | 1,141682841 | 473070000   |
| Eukaryotic translation initiation factor 5                                                                          | EIF5                           | 1,141513418 | 5552300000  |
| DNA-directed RNA polymerase II subunit RPB11-b2;DNA-directed RNA polymerase II subunit RPB11-b1;DNA-directed RNA    | POLR2J1;POLR2J3;POLR2J2;POL    | 1,141396156 | 204570000   |
| General transcription factor IIH subunit 2-like protein;General transcription factor IIH subunit 2                  | GTF2H2C;GTF2H2                 | 1,141383128 | 226310000   |
| Pericentriolar material 1 protein                                                                                   | PCM1                           | 1,141278917 | 456270000   |
| 17-beta-hydroxysteroid dehydrogenase 13                                                                             | HSD17B13                       | 1,141213795 | 1560300000  |
| Protein unc-119 homolog B                                                                                           | UNC119B                        | 1,141187748 | 109950000   |
| Nucleosome assembly protein 1-like 1                                                                                | NAP1L1                         | 1,140836233 | 12593000000 |
| Cathepsin B;Cathepsin B light chain;Cathepsin B heavy chain                                                         | CTSB                           | 1,140797189 | 307620000   |
| General transcription factor 3C polypeptide 4                                                                       | GTF3C4                         | 1,140745135 | 1917000000  |
| PH and SEC7 domain-containing protein 4                                                                             | PSD4                           | 1,140693085 | 100430000   |
| Alpha/beta hydrolase domain-containing protein 14B                                                                  | ABHD14B                        | 1,140654051 | 8001500000  |
| Anaphase-promoting complex subunit 2                                                                                | ANAPC2                         | 1,140497941 | 78836000    |
| Active regulator of SIRT1                                                                                           | RPS19BP1                       | 1,140497941 | 145390000   |
| WD40 repeat-containing protein SMU1;WD40 repeat-containing protein SMU1, N-terminally processed                     | SMU1                           | 1,140289862 | 2549600000  |
| Polymerase delta-interacting protein 3                                                                              | POLDIP3                        | 1,140003876 | 255140000   |
| Ubiquitin carboxyl-terminal hydrolase 10                                                                            | USP10                          | 1,139912911 | 347350000   |
| Importin subunit alpha;Importin subunit alpha-5;Importin subunit alpha-5, N-terminally processed                    | KPNA1                          | 1,139860937 | 1054900000  |
| Probable helicase with zinc finger domain                                                                           | HELZ                           | 1,139847944 | 127520000   |
| Cleavage and polyadenylation specificity factor subunit 2                                                           | CPSF2                          | 1,139354442 | 1451800000  |
| Transgelin-2                                                                                                        | TAGLN2                         | 1,139068925 | 1,1039E+11  |
| Ras-related protein Rab-27B                                                                                         | RAB27B                         | 1,138952164 | 837930000   |
| Protein PBDC1                                                                                                       | PBDC1                          | 1,138913249 | 2152800000  |
| Protein yippee-like 5                                                                                               | YPEL5                          | 1,138614989 | 400850000   |
| Cytoplasmic protein NCK1                                                                                            | NCK1                           | 1,138278013 | 462890000   |
| Gamma-aminobutyric acid receptor-associated protein-like 2                                                          | GABARAPL2                      | 1,1381096   | 175570000   |
| Protein Dr1                                                                                                         | DKFZp666G145;DR1               | 1,138096647 | 1343400000  |
| Pre-mRNA-processing factor 19                                                                                       | PRPF19                         | 1,137980085 | 5476000000  |
| DNA polymerase epsilon subunit 4                                                                                    | POLE4                          | 1,137837653 | 405230000   |
| Syntaxin-8                                                                                                          | STX8                           | 1,137630543 | 733880000   |
| Phosphatidylinositol 4-phosphate 5-kinase type-1 alpha                                                              | PIP5K1A                        | 1,13760466  | 22242000    |
| Nucleoporin NUP188 homolog                                                                                          | NUP188                         | 1,13747526  | 1526300000  |
| E3 ubiquitin-protein ligase MARCH5                                                                                  |                                | 1,137100167 | 878240000   |
| Armadillo repeat-containing protein 8                                                                               | ARMC8                          | 1,13677701  | 306740000   |
| Signal recognition particle receptor subunit alpha                                                                  | SRPR                           | 1,136647798 | 480280000   |
| Tetrapeptide repeat protein 27                                                                                      | TT C27                         | 1,136531533 | 497930000   |
| RNA-binding protein 33                                                                                              | RBM33                          | 1,136466952 | 233870000   |
| Protein LSM12 homolog                                                                                               | LSM12                          | 1,136389463 | 3405800000  |
| Lipoyl synthase, mitochondrial                                                                                      | LIAS                           | 1,13626034  | 94673000    |
| DCN1-like protein 1;DCN1-like protein                                                                               | DCUN1D1                        | 1,136576475 | 3360100000  |
| Isocitrate dehydrogenase [NADP];Isocitrate dehydrogenase [NADP] cytoplasmic                                         | IDH1                           | 1,135267072 | 1340000000  |
| Nucleolysin TIA-1 isoform p40                                                                                       | TIA1                           | 1,135228408 | 110290000   |
| DNA primase large subunit                                                                                           | PRIM2                          | 1,135060896 | 91963000    |
| Negative elongation factor A                                                                                        | NELFA;WHSC2                    | 1,135035129 | 179690000   |
| Replication factor C subunit 2                                                                                      | RFC2                           | 1,13481616  | 2363200000  |
| Sodium-coupled neutral amino acid transporter 2                                                                     | SLC38A2                        | 1,134610148 | 937220000   |
| Nuclear pore complex protein Nup93                                                                                  | NUP93                          | 1,134262673 | 4500600000  |
| Chromatin complexes subunit BAP18                                                                                   | C17orf49;BAP18;RNASEK-C17orf49 | 1,134198349 | 141530000   |
| Notchless protein homolog 1                                                                                         | NLE1                           | 1,134146895 | 1467500000  |
| Geranylgeranyl transferase type-1 subunit beta                                                                      | PGGT1B                         | 1,133863982 | 1862700000  |

|                                                                                                                                                          |                              |             |            |
|----------------------------------------------------------------------------------------------------------------------------------------------------------|------------------------------|-------------|------------|
| Alpha-adducin                                                                                                                                            | ADD1;LA04NC01-25A3.2-001     | 1,133761139 | 801280000  |
| Histone H3.2                                                                                                                                             | HIST2H3A                     | 1,13368402  | 1,289E+11  |
| Protein timeless homolog                                                                                                                                 | TIMELESS                     | 1,13360691  | 188050000  |
| Transforming growth factor beta-1;Latency-associated peptide                                                                                             | TGFB1                        | 1,133144476 | 1595000000 |
| Coiled-coil domain-containing protein 50                                                                                                                 | CCDC50                       | 1,132785065 | 195580000  |
| Fragile X mental retardation syndrome-related protein 1                                                                                                  | FXR1                         | 1,132785065 | 155400000  |
| Ubiquitin-fold modifier 1                                                                                                                                | UFM1                         | 1,132708078 | 239070000  |
| DnaJ homolog subfamily C member 8                                                                                                                        | DNAJC8                       | 1,132669589 | 596630000  |
| Protein 4.1                                                                                                                                              | EPB41                        | 1,132477181 | 246220000  |
| Sex hormone-binding globulin                                                                                                                             | SHBG                         | 1,132425883 | 307350000  |
| Proteasomal ubiquitin receptor ADRM1                                                                                                                     | ADRM1;DKFZp686G2045          | 1,132400236 | 175530000  |
| Dipeptidyl peptidase 8                                                                                                                                   | DPP8                         | 1,13155453  | 123790000  |
| Translationally-controlled tumor protein                                                                                                                 | TPT1                         | 1,13155453  | 897350000  |
| UBX domain-containing protein 4                                                                                                                          | UBXN4                        | 1,131080974 | 256630000  |
| Protein RTF2 homolog                                                                                                                                     | RTFDC1                       | 1,130889105 | 158690000  |
| cAMP-dependent protein kinase type II-beta regulatory subunit                                                                                            | PRKAR2B                      | 1,130825163 | 214050000  |
| Zinc finger protein 622                                                                                                                                  | ZNF622                       | 1,130812376 | 180470000  |
| AP-1 complex subunit sigma-2                                                                                                                             | DKFZp779P0659;AP1S2          | 1,130569468 | 121600000  |
| Nucleophosmin                                                                                                                                            | NPM1                         | 1,130186142 | 1,7152E+11 |
| Exosome complex component MTR3                                                                                                                           | EXOSC6                       | 1,130147823 | 520400000  |
| Arginine/serine-rich coiled-coil protein 2                                                                                                               | RSRC2;FLJ11021               | 1,129994576 | 49134000   |
| Fermitin family homolog 3                                                                                                                                | FERMT3                       | 1,129969039 | 271740000  |
| Exosome complex component RRP42                                                                                                                          | EXOSC7                       | 1,129752019 | 234780000  |
| Protein SET                                                                                                                                              | SET                          | 1,129394757 | 163650000  |
| N6-adenosine-methyltransferase subunit METTL4                                                                                                            | METTL4                       | 1,129139708 | 159470000  |
| Charged multivesicular body protein 7                                                                                                                    | CHMP7                        | 1,128961243 | 134710000  |
| Protein PRRC2C                                                                                                                                           | PRRC2C                       | 1,128540797 | 191900000  |
| Zinc finger MIZ domain-containing protein 1                                                                                                              | ZMIZ1                        | 1,128413451 | 181740000  |
| Neutral amino acid transporter B(0)                                                                                                                      | SLC1A5                       | 1,128247944 | 178230000  |
| Transcriptional repressor protein YY1                                                                                                                    | YY1                          | 1,128235214 | 503230000  |
| Mediator of RNA polymerase II transcription subunit 22                                                                                                   | MED22                        | 1,128209757 | 147550000  |
| Importin subunit alpha;Importin subunit alpha-7;Importin subunit alpha-6                                                                                 | KPNA6;KPNA5                  | 1,128197028 | 11396000   |
| Chromodomain-helicase-DNA-binding protein 4                                                                                                              | CHD4                         | 1,128197028 | 175850000  |
| Ubiquitin-like protein 7                                                                                                                                 | UBL7                         | 1,128057035 | 734720000  |
| Nuclear factor interleukin-3-regulated protein                                                                                                           | NFIL3                        | 1,127917076 | 83246000   |
| Protein Red                                                                                                                                              | CSA2;IK;DKFZp564B112         | 1,127459271 | 401460000  |
| Nuclear pore complex protein Nup214                                                                                                                      | EIF4ENIF1                    | 1,127395716 | 247050000  |
| Integrator complex subunit 11                                                                                                                            | NUP214;DKFZp686J0330         | 1,127332168 | 122570000  |
| Protein DEK                                                                                                                                              | CPSF3L                       | 1,126760563 | 364620000  |
| Inorganic pyrophosphatase                                                                                                                                | DDX19L                       | 1,126735172 | 59663000   |
| Probable ATP-dependent RNA helicase DDX17                                                                                                                | DEK                          | 1,126709782 | 415020000  |
| Glycogen phosphorylase, brain form;Phosphorylase                                                                                                         | PPA1                         | 1,126659005 | 1853000000 |
| Putative deoxyribose-phosphate aldolase                                                                                                                  | DDX17                        | 1,126620926 | 585890000  |
| UDP-N-acetylglucosamine-peptide N-acetylglucosaminyltransferase 110 kDa subunit                                                                          | PYGB                         | 1,126252956 | 310110000  |
| Glycerophosphodiester phosphodiesterase domain-containing protein 1                                                                                      | DERA                         | 1,126214904 | 133610000  |
| Pre-mRNA-splicing factor SPF27                                                                                                                           | OGT                          | 1,126088083 | 150970000  |
| Cysteine-rich and transmembrane domain-containing protein 1                                                                                              | GDPD1                        | 1,126012003 | 37560000   |
| Protein VAC14 homolog                                                                                                                                    | BCAS2                        | 1,12591058  | 276980000  |
| Tropomyosin alpha-1 chain                                                                                                                                | CYSTM1                       | 1,125631761 | 139100000  |
| Inverted formin-2                                                                                                                                        | VAC14                        | 1,12568412  | 770560000  |
| 2-methoxy-6-polyprenyl-1,4-benzoquinol methylase, mitochondrial                                                                                          | TPM1                         | 1,124834087 | 400150000  |
| MICAL-like protein 1;MICAL-like protein 2                                                                                                                | INF2                         | 1,124796131 | 496770000  |
| Inositol polyphosphate 5-phosphatase K                                                                                                                   | COQ5                         | 1,124416709 | 266540000  |
| Quinone oxidoreductase-like protein 1                                                                                                                    | MICAL1;DKFZp686M2226;MICAL-  | 1,124366139 | 29604000   |
| Exosome complex component RRP40                                                                                                                          | INPP5K                       | 1,124353497 | 12905000   |
| RNA polymerase II subunit A C-terminal domain phosphatase SSU72                                                                                          | CRYZL1                       | 1,124340855 | 125290000  |
| Lysine-specific demethylase 3B                                                                                                                           | EXOSC3                       | 1,124176541 | 502170000  |
| SNW domain-containing protein 1                                                                                                                          | SSU72                        | 1,124037543 | 244370000  |
| Serine/threonine-protein phosphatase 2A 56 kDa regulatory subunit epsilon isoform                                                                        | KDM3B;JMJD1B                 | 1,124012274 | 340410000  |
| 60S ribosomal protein L13                                                                                                                                | SNW1                         | 1,123709139 | 502330000  |
| Peptidyl-prolyl cis-trans isomerase-like 3;Peptidyl-prolyl cis-trans isomerase                                                                           | PPP2R5E                      | 1,123519763 | 454110000  |
| Histone-lysine N-methyltransferase SETD1A                                                                                                                | RPL13                        | 1,123393547 | 477680000  |
| Delta-aminolevulinic acid dehydratase                                                                                                                    | PPL3                         | 1,123292595 | 368470000  |
| Ribose-5-phosphate isomerase                                                                                                                             | SETD1A                       | 1,123279978 | 326380000  |
| IST1 homolog                                                                                                                                             | ALAD                         | 1,122952016 | 449520000  |
| Protein transport protein Sec24B                                                                                                                         | RPIA                         | 1,122901578 | 467600000  |
| Riboflavin kinase                                                                                                                                        | IST1                         | 1,122762895 | 213170000  |
| Eukaryotic translation initiation factor 4B                                                                                                              | SEC24B                       | 1,1222211   | 115210000  |
| Exosome complex component RRP41                                                                                                                          | RFK                          | 1,122170727 | 80482000   |
| DNA damage-binding protein 1                                                                                                                             | EIF4B                        | 1,12191893  | 595580000  |
| Histone-lysine N-methyltransferase setd3                                                                                                                 | EXOSC4                       | 1,121491135 | 213860000  |
| Far upstream element-binding protein 2                                                                                                                   | DDB1                         | 1,121264787 | 227960000  |
| THO complex subunit 3                                                                                                                                    | SETD3                        | 1,121239643 | 308380000  |
| DNA topoisomerase 2;DNA topoisomerase 2-beta                                                                                                             | KHSRP                        | 1,121239643 | 130190000  |
| Arf-GAP with GTPase, ANK repeat and PH domain-containing protein 3                                                                                       | THOC3                        | 1,121151647 | 90880000   |
| Fanconi anemia group I protein                                                                                                                           | TOP2B                        | 1,121063665 | 796960000  |
| Integral membrane protein 2B;BRI2, membrane form;BRI2 intracellular domain;BRI2C, soluble form;Bri23 peptide                                             | AGAP3;CENTG3                 | 1,120548621 | 51018000   |
| Uncharacterized protein C18orf8                                                                                                                          | FANCI                        | 1,120347756 | 65017000   |
| UDP-N-acetylglucosamine-peptide N-acetylglucosaminyltransferase 110 kDa subunit                                                                          | ITM2B                        | 1,120297551 | 343570000  |
| 60S acidic ribosomal protein P2                                                                                                                          | C18orf8                      | 1,119845909 | 122040000  |
| Heterogeneous nuclear ribonucleoprotein A1;Heterogeneous nuclear ribonucleoprotein A1, N-terminally processed;Heterogeneous nuclear ribonucleoprotein A1 | OGT                          | 1,119645296 | 30314000   |
| Glutaredoxin-1                                                                                                                                           | RPLP2                        | 1,119645296 | 650690000  |
| Protein FAM45A;Protein FAM45B                                                                                                                            | HNRNPA1;HNRPA1;HNRNPA1L2     | 1,119595154 | 428220000  |
| Polycomb protein EED                                                                                                                                     | GLRX;hCG_1979388             | 1,119532483 | 621600000  |
| Syntaxin-5                                                                                                                                               | FAM45A;FAM45B                | 1,11951995  | 605710000  |
| Prenylcysteine oxidase-like                                                                                                                              | EED                          | 1,119469819 | 204940000  |
| U6 snRNA-associated Sm-like protein LSM1                                                                                                                 | STX5A;STX5                   | 1,119382101 | 740770000  |
| Serine/threonine-protein kinase MARK2                                                                                                                    | PCYOX1L                      | 1,11919418  | 209490000  |
| Actin-related protein 10                                                                                                                                 | LSM1                         | 1,118668337 | 116380000  |
| Casein kinase I isoform alpha;Casein kinase I isoform alpha-like                                                                                         | MARK2;Par1b                  | 1,118092981 | 278170000  |
| Ubiquitin-2                                                                                                                                              | ACTR10                       | 1,118042978 | 665740000  |
| Induced myeloid leukemia cell differentiation protein Mcl-1                                                                                              | CSNK1A1;CSNK1A1L             | 1,117967981 | 246310000  |
| WD repeat-containing protein 70                                                                                                                          | UBQLN2                       | 1,117892995 | 109020000  |
| Protein FAM192A                                                                                                                                          | MCL1                         | 1,117868002 | 145480000  |
| Glycogen synthase kinase-3 beta                                                                                                                          | WDR70                        | 1,117305952 | 46755000   |
| Adenine phosphoribosyltransferase                                                                                                                        | FAM192A;NIF30                | 1,117181129 | 599270000  |
| Nuclear transport factor 2                                                                                                                               | GSK3B                        | 1,117156167 | 171860000  |
| Protein BUD31 homolog                                                                                                                                    | APRT                         | 1,117106248 | 533830000  |
| Eukaryotic translation initiation factor 4 gamma 2                                                                                                       | NUTF2                        | 1,116956517 | 515350000  |
| Mitogen-activated protein kinase;Mitogen-activated protein kinase 1                                                                                      | BUD31                        | 1,116657175 | 130710000  |
| 60S ribosomal export protein NMD3                                                                                                                        | EIF4G2;AAG1                  | 1,116632237 | 768490000  |
| DNA replication licensing factor MCM5                                                                                                                    | MAPK1                        | 1,116544963 | 198790000  |
| Protein kinase C delta type;Protein kinase C delta type regulatory subunit;Protein kinase C delta type catalytic subunit;Protein kinase C delta type     | NMD3                         | 1,116482633 | 176220000  |
| Retinolocalin-1                                                                                                                                          | MCM5                         | 1,116457703 | 918920000  |
| Elongation factor 1-alpha;Elongation factor 1-alpha 1;Putative elongation factor 1-alpha-like 3                                                          | PRKCD                        | 1,116445238 | 104260000  |
| Protein phosphatase 1G                                                                                                                                   | RCN1                         | 1,116345531 | 187640000  |
|                                                                                                                                                          | EEF1A1;EEF1A1P5;EEF1A1L14;PT | 1,116308146 | 8,0069E+11 |
|                                                                                                                                                          | PPM1G                        | 1,116245842 | 210720000  |



|                                                                                                                        |                       |             |             |
|------------------------------------------------------------------------------------------------------------------------|-----------------------|-------------|-------------|
| Poly(rC)-binding protein 1                                                                                             | PCBP1                 | 1,116220922 | 1,0892E+11  |
| Caspase-7,Caspase-7 subunit p20;Caspase-7 subunit p11                                                                  | CASP7                 | 1,115847263 | 449400000   |
| Protein S100-A10                                                                                                       | S100A10               | 1,115623187 | 332340000   |
| Malic enzyme;NADP-dependent malic enzyme                                                                               | ME1                   | 1,115610741 | 66345000    |
| Thioredoxin-related transmembrane protein 2                                                                            | TMX2                  | 1,115200178 | 1928000000  |
| Dual specificity protein kinase CLK3                                                                                   | CLK3                  | 1,115150434 | 30490000    |
| Charged multivesicular body protein 5                                                                                  | CHMP5                 | 1,115001227 | 1125400000  |
| Ubiquitin fusion degradation protein 1 homolog                                                                         | ufd1;UFD1L            | 1,1149515   | 2225300000  |
| Peflin                                                                                                                 | PEF1                  | 1,114814774 | 1337500000  |
| Poly(ADP-ribose) glycohydrolase ARH3                                                                                   | ADPRHL2               | 1,114417216 | 1365300000  |
| Calcineurin B homologous protein 1                                                                                     | CHP1                  | 1,114404796 | 1266400000  |
| Tubulin-tyrosine ligase-like protein 12                                                                                | TTL12                 | 1,114379959 | 1042000000  |
| RNMT-activating mini protein                                                                                           | FAM103A1              | 1,114193714 | 181430000   |
| Protein VPRBP                                                                                                          | VPRBP                 | 1,114081996 | 604870000   |
| ADP-ribosylation factor 5                                                                                              | ARF5                  | 1,114019941 | 3186200000  |
| N6-adenosine-methyltransferase 70 kDa subunit                                                                          | METTL3                | 1,113635351 | 307720000   |
| Zinc finger MYM-type protein 2                                                                                         | ZMYM2                 | 1,113548545 | 58028000    |
| Na(+)/H(+) exchange regulatory cofactor NHE-RF1                                                                        | SLC9A3R1              | 1,113362578 | 192620000   |
| Ras-related protein Rab-8B                                                                                             | RAB8B                 | 1,113312997 | 1996600000  |
|                                                                                                                        | PQBP1                 | 1,113176672 | 4356700000  |
| Retinoblastoma-like protein 1                                                                                          | RBL1                  | 1,113065159 | 455670000   |
| Parafibromin                                                                                                           | CDC73                 | 1,11305277  | 313910000   |
| Small ubiquitin-related modifier 2;Small ubiquitin-related modifier 4                                                  | SUMO2;SUMO4           | 1,112656467 | 2218800000  |
| DNA replication licensing factor MCM4                                                                                  | MCM4                  | 1,112656467 | 11023000000 |
| Protein QIL1                                                                                                           | C19orf70;QIL1         | 1,112606949 | 189660000   |
| COP9 signalosome complex subunit 8                                                                                     | COPS8                 | 1,112309934 | 1679000000  |
| 26S proteasome non-ATPase regulatory subunit 10                                                                        | PSMD10                | 1,112272818 | 640920000   |
| CLIP-associating protein 1                                                                                             | CLASP1                | 1,112136748 | 1267500000  |
| Histone deacetylase;Histone deacetylase 1                                                                              | HDAC1                 | 1,112112012 | 2973300000  |
| Ubiquitin-conjugating enzyme E2 E3                                                                                     | UBE2E3                | 1,112013077 | 2517600000  |
| Transcriptional adapter 1                                                                                              | TADA1                 | 1,111827622 | 176760000   |
| Ankyrin repeat domain-containing protein 13A                                                                           | ANKRD13;ANKRD13A      | 1,111580445 | 86043000    |
| Coiled-coil and C2 domain-containing protein 1B                                                                        | CC2D1B                | 1,111308677 | 309290000   |
| Breakpoint cluster region protein                                                                                      | BCR;BCR/ABL fusion    | 1,111074075 | 1038400000  |
| DnaJ homolog subfamily C member 7                                                                                      | DNAJC7                | 1,110962983 | 1612900000  |
| Renin receptor                                                                                                         | ATP6AP2               | 1,110889933 | 233230000   |
| Filamin-B                                                                                                              | FLNB;DKFZp686A1668    | 1,11071619  | 2848600000  |
| Exosome complex exonuclease RRP44                                                                                      | DIS3                  | 1,110420183 | 2104200000  |
| Sorting nexin-4                                                                                                        | SNX4                  | 1,110346206 | 91230000    |
| Alpha/beta hydrolase domain-containing protein 17B                                                                     | ABHD17B               | 1,110148982 | 702660000   |
| BRCA1-A complex subunit BRE                                                                                            | BRE                   | 1,110087364 | 2185000000  |
| E3 ubiquitin-protein ligase RNF185                                                                                     | RNF185                | 1,109890232 | 987450000   |
| Neuron-specific calcium-binding protein hippocalcin                                                                    | HPCA                  | 1,109828642 | 198850000   |
| Eukaryotic translation initiation factor 3 subunit J                                                                   | EIF3J                 | 1,109816325 | 9196300000  |
| Ran-binding protein 3                                                                                                  | ZNF8;RANBP3           | 1,109779376 | 527540000   |
| Thyroid receptor-interacting protein 11                                                                                | TRIP11;DKFZp686C06243 | 1,109213124 | 174860000   |
| Inositol polyphosphate 1-phosphatase                                                                                   | INPP1                 | 1,109163912 | 230210000   |
| Telomerase-binding protein EST1A                                                                                       | SMG6                  | 1,108967108 | 206860000   |
| RING finger protein 214                                                                                                | RNF214                | 1,10875808  | 55141000    |
| TBC1 domain family member 15                                                                                           | TBC1D15               | 1,10875808  | 1583900000  |
| Histone deacetylase complex subunit SAP130                                                                             | SAP130                | 1,108745787 | 125810000   |
| Short coiled-coil protein                                                                                              | SCOC                  | 1,108696616 | 32262000    |
| CDK-activating kinase assembly factor MAT1                                                                             | MNAT1                 | 1,108573709 | 566730000   |
|                                                                                                                        | RPLP1                 | 1,108438543 | 3893600000  |
| Ankyrin repeat and LEM domain-containing protein 2                                                                     | ANKLE2                | 1,108278843 | 31970000    |
| DNA replication licensing factor MCM6                                                                                  | MCM6                  | 1,107885932 | 11062000000 |
| Partner of Y14 and mago                                                                                                | WIBG                  | 1,107542363 | 152460000   |
| Splicing factor 3B subunit 1                                                                                           | SF3B1                 | 1,107382922 | 35746000000 |
| MHC class II regulatory factor RFX1                                                                                    | RFX1                  | 1,107199008 | 55009000    |
| Ankyrin repeat and SAM domain-containing protein 1A                                                                    | ANKS1A                | 1,107186749 | 55309000    |
| DNA-directed RNA polymerases I, II, and III subunit RPABC1                                                             | POLR2E                | 1,106880368 | 2052900000  |
| Protein furry homolog-like                                                                                             | FRYL                  | 1,106843614 | 1496000000  |
| Cyclin-dependent kinase 2                                                                                              | CDK2                  | 1,106831363 | 2960000000  |
| DnaJ homolog subfamily C member 9                                                                                      | DNAJC9                | 1,106770113 | 797830000   |
| Zinc finger CCCH domain-containing protein 7B                                                                          | ZC3H7B                | 1,106476205 | 16273000    |
| DNA replication licensing factor MCM7                                                                                  | MCM7                  | 1,10645172  | 8608100000  |
| Kidney mitochondrial carrier protein 1;Brain mitochondrial carrier protein 1                                           | SLC25A30;SLC25A14     | 1,105998938 | 152390000   |
| Bifunctional protein NCOAT;Protein O-GlcNAcAcase;Histone acetyltransferase                                             | MGEA5                 | 1,105974474 | 4410200000  |
| Heat shock 70 kDa protein 4L                                                                                           | HSPA4L                | 1,105950011 | 1516300000  |
| Histone H3                                                                                                             | HIST2H3PS2            | 1,105680989 | 10316000000 |
| Signal recognition particle receptor subunit beta                                                                      | SRPRB                 | 1,105644314 | 2750300000  |
| Serine/threonine-protein kinase PAK 3                                                                                  | PAK3                  | 1,105399878 | 398010000   |
| Nuclear factor NF-kappa-B p100 subunit;Nuclear factor NF-kappa-B p52 subunit                                           | NFKB2                 | 1,105277701 | 887490000   |
| TRMT1-like protein                                                                                                     | TRMT1L                | 1,105155551 | 70395000    |
| FAD synthase;Molybdenum cofactor biosynthesis protein-like region;FAD synthase region                                  | FLAD1                 | 1,105045638 | 22553000    |
| Flavin reductase (NADPH)                                                                                               | BLVRB                 | 1,105033427 | 1890800000  |
| Golgi phosphoprotein 3                                                                                                 | GOLPH3                | 1,104886915 | 657100000   |
| Small integral membrane protein 11                                                                                     | SMIM11                | 1,104752646 | 96030000    |
| 14-3-3 protein theta                                                                                                   | YWHAQ                 | 1,104606208 | 30670000000 |
| Formin-binding protein 4                                                                                               | FNBP4                 | 1,104228089 | 477960000   |
| GPN-loop GTPase 3                                                                                                      | GNP3                  | 1,104167127 | 153570000   |
| Immunoglobulin-binding protein 1                                                                                       | IGBP1                 | 1,103838045 | 180100000   |
| Chromatin target of PRMT1 protein                                                                                      | CHTOP                 | 1,103630946 | 887520000   |
| F-actin-capping protein subunit alpha-1                                                                                | CAPZA1                | 1,103606586 | 11130000000 |
| Charged multivesicular body protein 2b                                                                                 | CHMP2B                | 1,103582228 | 402330000   |
| Tumor necrosis factor receptor type 1-associated DEATH domain protein                                                  | TRADD                 | 1,103387399 | 436740000   |
| Serine/threonine-protein phosphatase;Serine/threonine-protein phosphatase 2A catalytic subunit alpha isoform           | PPP2CA                | 1,103363051 | 15593000000 |
| 14-3-3 protein eta                                                                                                     | YWHAH                 | 1,103326529 | 29816000000 |
| Cysteine and glycine-rich protein 1                                                                                    | CSRP1;DKFZp686M148    | 1,103314356 | 5029900000  |
| Enolase-phosphatase E1                                                                                                 | ENOPH1                | 1,103131791 | 1239200000  |
| Histone-lysine N-methyltransferase EZH2                                                                                | EZH2                  | 1,103119622 | 91767000    |
| Protein strawberry notch homolog 1                                                                                     | SBNO1                 | 1,103107454 | 2395700000  |
| Exocyst complex component 5                                                                                            | EXO5;DKFZp666H126     | 1,103083117 | 203150000   |
| Cleavage stimulation factor subunit 2                                                                                  | CSTF2                 | 1,102864138 | 1364000000  |
| CUGBP Elav-like family member 2                                                                                        | CELF2                 | 1,102803326 | 884030000   |
| Ubiquitin-1                                                                                                            | UBQLN1                | 1,102572301 | 2073300000  |
| SWI/SNF-related matrix-associated actin-dependent regulator of chromatin subfamily B member 1                          | SMARCB1               | 1,102450748 | 1059500000  |
| 14-3-3 protein beta/alpha;14-3-3 protein beta/alpha, N-terminally processed                                            | YWHA8                 | 1,102438594 | 25672000000 |
| Integrin alpha-5;Integrin alpha-5 heavy chain;Integrin alpha-5 light chain                                             | ITGA5                 | 1,102426441 | 486650000   |
| Bifunctional ATP-dependent dihydroxyacetone kinase/FAD-AMP lyase (cyclizing);ATP-dependent dihydroxyacetone kinase;DAK | ATP6V0D1              | 1,102385677 | 31265000    |
| V-type proton ATPase subunit d 1                                                                                       | ATP6V0D1              | 1,102329222 | 3521900000  |
| Trafficking protein particle complex subunit 5                                                                         | TRAPP5                | 1,10223202  | 1368900000  |
| ORM1-like protein 3                                                                                                    | ORMDL3                | 1,102219871 | 22173000    |
| DnaJ homolog subfamily C member 21                                                                                     | DNAJC21               | 1,102049813 | 67449000    |
| Integrin alpha-V;Integrin alpha-V heavy chain;Integrin alpha-V light chain                                             | ITGAV                 | 1,10198909  | 150480000   |
| Poly(U)-binding-splicing factor PUF60                                                                                  | PUF60                 | 1,101964803 | 4826400000  |
| Cyclin-T1;Cyclin-T2                                                                                                    | CCNT1;CCNT2           | 1,101891948 | 72477000    |
| Guanine nucleotide-binding protein subunit alpha-13                                                                    | GNAI3                 | 1,101879807 | 774630000   |

|                                                                                                                       |                             |             |             |
|-----------------------------------------------------------------------------------------------------------------------|-----------------------------|-------------|-------------|
| Ribosome maturation protein SBDS                                                                                      | SBDS                        | 1,101685579 | 8971100000  |
| Tumor suppressor p53-binding protein 1                                                                                | TP53BP1                     | 1,10144289  | 876830000   |
| UBX domain-containing protein 7                                                                                       | UBXN7                       | 1,10113968  | 749510000   |
| Clathrin interactor 1                                                                                                 | CLINT1                      | 1,10113968  | 2331000000  |
| SOSS complex subunit B1                                                                                               | NABP2                       | 1,101103306 | 74380000    |
| Uridine 5-monophosphate synthase;Orotate phosphoribosyltransferase;Orotidine 5-phosphate decarboxylase;Orotidine 5-pi | UMPS                        | 1,100872992 | 5762400000  |
| Ubiquitin carboxyl-terminal hydrolase;Ubiquitin carboxyl-terminal hydrolase 4                                         | USP4                        | 1,100703349 | 991490000   |
| E3 ubiquitin-protein ligase RNF126                                                                                    | RNF126                      | 1,100400546 | 422310000   |
| Factor VIII intron 22 protein                                                                                         | F8A1                        | 1,100340005 | 65040000    |
| Ribosome-binding protein 1                                                                                            | RRBP1                       | 1,100110011 | 2590800000  |
| DNA polymerase epsilon subunit 3                                                                                      | POLE3                       | 1,099964801 | 759060000   |
| Replication factor C subunit 1                                                                                        | RFC1                        | 1,099964801 | 713290000   |
| Protein tyrosine phosphatase type IVA 1                                                                               | PTP4A1                      | 1,099843822 | 1794300000  |
| Niban-like protein 1                                                                                                  | FAM129B                     | 1,099795438 | 379150000   |
| Trafficking protein particle complex subunit 4                                                                        | TRAPPC4                     | 1,099239326 | 1960500000  |
| Apoptosis inhibitor 5                                                                                                 | API5                        | 1,099203078 | 7940000000  |
| Heterogeneous nuclear ribonucleoprotein A0                                                                            | HNRNPA0                     | 1,099178913 | 5871400000  |
| Nuclear pore complex protein Nup50                                                                                    | NUP50                       | 1,09915475  | 417530000   |
| Protein MEMO1                                                                                                         | MEMO1                       | 1,099021871 | 6116700000  |
| Rho guanine nucleotide exchange factor 6                                                                              | ARHGEF6                     | 1,098997714 | 363080000   |
| Annexin;Annexin A3                                                                                                    | ANXA3                       | 1,098683777 | 711670000   |
| Lysophospholipid acyltransferase 5                                                                                    | LPCAT3                      | 1,098599286 | 1043700000  |
| Heterogeneous nuclear ribonucleoprotein K                                                                             | HNRPK;HNRNPK                | 1,098563079 | 6655800000  |
| TATA-box-binding protein;TATA box-binding protein-like protein 2                                                      | TBP;TBPL2                   | 1,098454475 | 431150000   |
| Cyclin-dependent kinase 7                                                                                             | CDK7                        | 1,098406213 | 1160500000  |
| Craniofacial development protein 1                                                                                    | CFDP1                       | 1,098273514 | 782690000   |
| Exportin-T                                                                                                            | XPO1                        | 1,097996157 | 6014300000  |
| Spastin                                                                                                               | SPAST                       | 1,097899718 | 42975000    |
| Probable ATP-dependent RNA helicase DHX35                                                                             | DHX35                       | 1,097851505 | 41598000    |
| Scaffold attachment factor B1;Scaffold attachment factor B2                                                           | SAFB;SAFB2                  | 1,097658694 | 91555000    |
| Replication factor C subunit 5                                                                                        | RFC5                        | 1,09751413  | 4160500000  |
| PHD finger-like domain-containing protein 5A                                                                          | PHF5A                       | 1,097453907 | 1403400000  |
| Heterogeneous nuclear ribonucleoprotein K                                                                             | HNRNPK                      | 1,097417776 | 74039000    |
| Protein HGH1 homolog                                                                                                  | C8orf30A;HGH1               | 1,097032527 | 335140000   |
| THUMP domain-containing protein 1                                                                                     | DKFZp686C1054;THUMP1;44M2.  | 1,09690016  | 5596200000  |
| EMILIN-2                                                                                                              | EMILIN2                     | 1,09658742  | 355730000   |
| Arfaptin-1                                                                                                            | ARFIP1                      | 1,096551346 | 1369500000  |
| TBC1 domain family member 4                                                                                           | TBC1D4                      | 1,09645516  | 52558000    |
| Probable ATP-dependent RNA helicase DDX27                                                                             | DDX27                       | 1,096443138 | 67046000    |
| U4/U6 small nuclear ribonucleoprotein Prp4                                                                            | PRPF4                       | 1,096190737 | 841480000   |
| RNA polymerase II-associated factor 1 homolog                                                                         | PAF1                        | 1,09575832  | 431120000   |
| Mannosyl-oligosaccharide 1,2-alpha-mannosidase IA                                                                     | MAN1A1                      | 1,095698289 | 68738000    |
| m7GpppX diphosphatase                                                                                                 | DCPS                        | 1,095638264 | 6418700000  |
| Oxysterol-binding protein;Oxysterol-binding protein-related protein 9                                                 | OSBP1                       | 1,09562626  | 306020000   |
| ATP-binding cassette sub-family E member 1                                                                            | ABCE1                       | 1,095470231 | 2108900000  |
| Myotubularin-related protein 12                                                                                       | MTMR12                      | 1,09543423  | 89934000    |
| Splicing factor 3B subunit 2                                                                                          | SF3B2;DKFZp781L0540         | 1,095386233 | 9205800000  |
| Phosphatidylinositol 5-phosphate 4-kinase type-2 gamma                                                                | PIP4K2C                     | 1,09533824  | 311570000   |
| Ubiquitin carboxyl-terminal hydrolase isozyme L5                                                                      | UCHL5                       | 1,095230272 | 1010300000  |
| MAP kinase-activated protein kinase 2                                                                                 | MAPKAPK2                    | 1,095122325 | 1126500000  |
| Splicing factor 3B subunit 4                                                                                          | SF3B4                       | 1,094990419 | 1384000000  |
| Splicing factor 3B subunit 6                                                                                          | SF3B6                       | 1,09495445  | 2533700000  |
| MOB kinase activator 2                                                                                                | MOB2                        | 1,094534987 | 286730000   |
| ELKS/Rab6-interacting/CAST family member 1                                                                            | ERC1                        | 1,094511027 | 570590000   |
| F-box-like/WD repeat-containing protein TBL1X                                                                         | TBL1X                       | 1,094451133 | 1155600000  |
| Zinc finger CCHC domain-containing protein 8                                                                          | ZCCHC8                      | 1,094415199 | 169390000   |
| Synaptotagmin-1                                                                                                       | SYNJ1                       | 1,094367292 | 567990000   |
| Phosphatidylinositol-binding clathrin assembly protein                                                                | PICALM                      | 1,094355315 | 2213900000  |
| Eyes absent homolog 3                                                                                                 | EYA3                        | 1,094032055 | 137190000   |
| ORM1-like protein 1;ORM1-like protein 2                                                                               | ORMDL1;ORMDL2;ORMDL3        | 1,093984181 | 301840000   |
| Tubulin-specific chaperone A                                                                                          | TBCA                        | 1,093984181 | 1454800000  |
| PAX3- and PAX7-binding protein 1                                                                                      | PAXBP1                      | 1,093864514 | 412080000   |
| Tubulin alpha-4A chain                                                                                                | TUBA4A                      | 1,093756836 | 7923600000  |
| ATP-dependent RNA helicase DDX19A                                                                                     | DDX19A;DDX19B;DKFZp762C1313 | 1,093589379 | 3140600000  |
| WW domain-binding protein 11                                                                                          | WBP11                       | 1,093457842 | 757230000   |
| Protein-L-isoaspartate O-methyltransferase;Protein-L-isoaspartate(D-aspartate) O-methyltransferase                    | PCMT1                       | 1,093445885 | 4906200000  |
| TATA-binding protein-associated factor 172                                                                            | BTF1                        | 1,093290476 | 8573900000  |
| Zinc finger protein ubi-d4                                                                                            | DPF2                        | 1,093278524 | 1667200000  |
|                                                                                                                       | PIK3CG                      | 1,093182911 | 434340000   |
| Myosin light polypeptide 6                                                                                            | MYL6;PDE6H                  | 1,093170961 | 2946800000  |
| Protein phosphatase inhibitor 2-like protein 3;Protein phosphatase inhibitor 2                                        | PPP1R2;PPP1R2P3             | 1,093170961 | 2122200000  |
| Protein Hook homolog 3                                                                                                | HOOK3                       | 1,093123162 | 426830000   |
| Polyribonucleotide 5-hydroxyl-kinase Clp1                                                                             | CLP1                        | 1,093027577 | 417380000   |
| 60S ribosomal protein L30                                                                                             | RPL30                       | 1,092872287 | 4337600000  |
| Glutamate--cysteine ligase regulatory subunit                                                                         | GCLM                        | 1,092800629 | 5231400000  |
| Inhibitor of nuclear factor kappa-B kinase subunit beta                                                               | IKKB                        | 1,092788687 | 224960000   |
|                                                                                                                       | HSP90Af                     | 1,092705101 | 44432000    |
| Programmed cell death protein 6                                                                                       | PDCD6                       | 1,092633465 | 4750000000  |
| Lymphoid-specific helicase                                                                                            | HELLS                       | 1,092609589 | 116210000   |
| Nucleoporin SEH1                                                                                                      | SEH1L                       | 1,092537966 | 730670000   |
| Inositol-3-phosphate synthase 1                                                                                       | ISYNA1                      | 1,092358949 | 3027500000  |
| Transcription factor p65                                                                                              | RELA                        | 1,092335085 | 587970000   |
| Cellular nucleic acid-binding protein                                                                                 | CNBP                        | 1,092072645 | 23029000000 |
| PDZ domain-containing protein 11                                                                                      | PDZD11                      | 1,092060719 | 377340000   |
| Kinesin-like protein KIF2A                                                                                            | KIF2A                       | 1,092060719 | 1784800000  |
| Trafficking protein particle complex subunit 2-like protein                                                           | TRAPPC2L                    | 1,092013017 | 81442000    |
| La-related protein 7                                                                                                  | LARP7                       | 1,091631553 | 4749000000  |
| Protein PAT1 homolog 1                                                                                                | PATL1                       | 1,091429008 | 193560000   |
| Guanine nucleotide exchange factor MSS4                                                                               | RABIF                       | 1,091345629 | 118150000   |
| Lysosomal alpha-mannosidase;Lysosomal alpha-mannosidase A peptide;Lysosomal alpha-mannosidase B peptide;Lysosomal     | MANB;MAN2B1                 | 1,091309899 | 86773000    |
| Tyrosine-protein kinase;Tyrosine-protein kinase SYK                                                                   | SYK                         | 1,091119379 | 791160000   |
| Protein SON                                                                                                           | SON                         | 1,090857523 | 230020000   |
| Gem-associated protein 2                                                                                              | GEMIN2                      | 1,090655266 | 423270000   |
| Heat shock protein 105 kDa                                                                                            | HSPH1                       | 1,090369853 | 13212000000 |
| Zinc finger CCCH domain-containing protein 7A                                                                         | ZC3H7A                      | 1,090191547 | 64093000    |
| 6-phosphogluconate dehydrogenase, decarboxylating                                                                     |                             | 1,090191547 | 11874000    |
| Protein PRRC2B                                                                                                        | BAT2L;PRRC2B                | 1,090108357 | 24333000    |
| FAS-associated factor 1                                                                                               | FAF1                        | 1,090037061 | 7016000000  |
| Protein FAM76B                                                                                                        | FAM76B                      | 1,08988262  | 397330000   |
| tRNA (guanine(37)-N1)-methyltransferase                                                                               | TRMT5                       | 1,089823231 | 130010000   |
| Serine/threonine-protein phosphatase 2B catalytic subunit beta isoform;Serine/threonine-protein phosphatase           | PPP3CB                      | 1,08966885  | 123870000   |
| Xaa-Pro aminopeptidase 1                                                                                              | XPNPEP1                     | 1,089656976 | 7913400000  |
| Phosphatidylinositol 3-kinase;Phosphatidylinositol 3-kinase catalytic subunit type 3                                  | PIK3C3                      | 1,089514512 | 43419000    |
| Protein arginine N-methyltransferase 7                                                                                | PRMT7                       | 1,089383953 | 144570000   |
| TIP41-like protein                                                                                                    | TIPRL                       | 1,089229697 | 4520000000  |
| AH receptor-interacting protein;Peptidyl-prolyl cis-trans isomerase                                                   | AIP                         | 1,089158516 | 3042400000  |
| Bifunctional purine biosynthesis protein PURH;Phosphoribosylaminoimidazolecarboxamide formyltransferase;IMP cyclohydr | ATIC                        | 1,089063623 | 915030000   |
| SEC23-interacting protein                                                                                             | SEC23IP                     | 1,08894503  | 2493800000  |

|                                                        |                             |             |             |
|--------------------------------------------------------|-----------------------------|-------------|-------------|
| Mediator of RNA polymerase II transcription subunit 17 | MED17                       | 1,088933172 | 262880000   |
| Cytoplasmic FMR1-interacting protein 1                 | CYFIP1                      | 1,088838318 | 1664200000  |
| Abhydrolase domain-containing protein 4                | ABHD4                       | 1,088802752 | 261870000   |
| Regulator of nonsense transcripts 1                    | UPF1                        | 1,088802752 | 20433000000 |
| U2 small nuclear ribonucleoprotein B                   | SNRFB2                      | 1,088779043 | 4759100000  |
| Probable E3 ubiquitin-protein ligase HERC1             | HERC1                       | 1,088755335 | 619970000   |
| Calreticulin                                           | CALR                        | 1,088613107 | 69969000000 |
| Methyltransferase-like protein 16                      | METTL16                     | 1,088542007 | 608970000   |
| Transcription initiation factor TFIID subunit 7        | TAF7                        | 1,088435374 | 327320000   |
| 40S ribosomal protein S27                              | RPS27                       | 1,088352452 | 11328000000 |
| 3-ketodihydroxyphosphoglycerate reductase              | KDSR                        | 1,088127441 | 762030000   |
|                                                        | C16orf45                    | 1,088032728 | 519370000   |
|                                                        | XAB2;DKFZp762C1015          | 1,087985377 | 417450000   |
|                                                        | CTS5                        | 1,087949867 | 21449000000 |
|                                                        | ZWILCH                      | 1,087831517 | 92900000    |
|                                                        | PPP2R5D                     | 1,08780785  | 930790000   |
|                                                        | FAM98A                      | 1,087748687 | 293860000   |
|                                                        | GNAI3                       | 1,087701361 | 1902000000  |
|                                                        | TAGLN3                      | 1,08768953  | 20462000000 |
|                                                        | UBE2Z                       | 1,08761855  | 3640100000  |
|                                                        | HIST1H4F;GTF2A1             | 1,087559408 | 522470000   |
|                                                        | CNPB                        | 1,087452968 | 515340000   |
|                                                        | STAM                        | 1,087452968 | 277490000   |
|                                                        | LOC392793;EEF1B2            | 1,087417492 | 12601000000 |
|                                                        | FAT4                        | 1,08731108  | 258210000   |
|                                                        | PRKRIR                      | 1,087287435 | 72124000    |
|                                                        | GNB2                        | 1,087216508 | 50775000000 |
|                                                        | CCNK                        | 1,08715741  | 246830000   |
|                                                        | PLEKH45                     | 1,08715741  | 343400000   |
|                                                        | SERBP1;DKFZp686P17171       | 1,08715741  | 16961000000 |
|                                                        | DCP1A;Nbla00360             | 1,087098317 | 87614000    |
|                                                        | RPS10-NUDT3                 | 1,087027415 | 35604000000 |
|                                                        | RAD23B                      | 1,086980152 | 6206800000  |
|                                                        | BTF3L4                      | 1,086921079 | 3014100000  |
|                                                        | GNPDA2                      | 1,086897451 | 501390000   |
|                                                        | GMPS                        | 1,086814763 | 8435600000  |
|                                                        | LYPLA1                      | 1,086743898 | 1925000000  |
|                                                        | NCOA2                       | 1,086531357 | 60758000    |
|                                                        | WDR61                       | 1,086425118 | 17079000000 |
|                                                        | CTNBNL1                     | 1,086413315 | 14046000000 |
|                                                        | RGS14                       | 1,08638971  | 12087000    |
|                                                        | CSE1L                       | 1,086366105 | 26354000000 |
|                                                        | HMGAI                       | 1,085941403 | 491370000   |
|                                                        | TXN                         | 1,085835279 | 10891000000 |
|                                                        | METAP2                      | 1,085646665 | 3762900000  |
|                                                        | PTGR2                       | 1,085623093 | 1043300000  |
|                                                        | FLNA;FLJ00119               | 1,085564168 | 1,9472E+11  |
|                                                        | MMGT1                       | 1,08539921  | 64559000    |
|                                                        | AHNAK                       | 1,085257857 | 26193000    |
|                                                        | DCTPP1                      | 1,085151867 | 115830000   |
|                                                        | PCF11                       | 1,085081218 | 349440000   |
|                                                        | GOSR2                       | 1,085069444 | 368960000   |
|                                                        | RBM4                        | 1,084998807 | 269740000   |
|                                                        | NUP155                      | 1,084822252 | 79396000000 |
|                                                        | TALDO1                      | 1,084669284 | 44202000000 |
|                                                        | CHORDC1                     | 1,084645755 | 8310200000  |
|                                                        | USP39                       | 1,084575172 | 1466400000  |
|                                                        | SLC6A9                      | 1,08451636  | 76378000    |
|                                                        | PRDX6                       | 1,084481076 | 38736000000 |
|                                                        | RASSF5;FLJ00186             | 1,084422274 | 621770000   |
|                                                        | TRIM28                      | 1,084140114 | 16652000000 |
|                                                        | MRPL47                      | 1,084128361 | 152480000   |
|                                                        | TNP01                       | 1,083670174 | 10778000000 |
|                                                        | PSIP1                       | 1,083071591 | 3416200000  |
|                                                        | LLDBP                       | 1,083048131 | 262480000   |
|                                                        | NADK2                       | 1,083012942 | 197100000   |
|                                                        | MED10                       | 1,082860484 | 152440000   |
|                                                        | HGS                         | 1,082801858 | 570110000   |
|                                                        | NUP107                      | 1,082485386 | 507960000   |
|                                                        | EMC7                        | 1,082450234 | 1815400000  |
|                                                        | RPLP1                       | 1,082450234 | 2544100000  |
|                                                        | FOXK1;KIAA0415              | 1,082415085 | 265300000   |
|                                                        | ARFRP1                      | 1,082215945 | 640020000   |
|                                                        | LYN                         | 1,082215945 | 1416200000  |
|                                                        | SEC61B                      | 1,0821691   | 150570000   |
|                                                        | DKFZp686A111;GTF3C1;DKFZp68 | 1,082122258 | 552690000   |
|                                                        | CETN3                       | 1,082110548 | 52348000    |
|                                                        | NANP                        | 1,082063712 | 581310000   |
|                                                        | RPL10                       | 1,082028587 | 47526000000 |
|                                                        | LRCH1                       | 1,081923227 | 56052000    |
|                                                        | HLTF                        | 1,081899816 | 36042000    |
|                                                        | SELK                        | 1,081876406 | 194640000   |
|                                                        | PEX5                        | 1,081864702 | 86903000    |
|                                                        | PIK3R1                      | 1,081841294 | 930560000   |
|                                                        | MCM2                        | 1,081642366 | 17962000000 |
|                                                        | GID8                        | 1,081548778 | 1434700000  |
|                                                        | ADPRH                       | 1,081221348 | 333740000   |
|                                                        | LTN1                        | 1,081116144 | 440660000   |
|                                                        | HSPA1L                      | 1,081104456 | 415240000   |
|                                                        | MYH10                       | 1,081069394 | 11632000000 |
|                                                        | GOSR1                       | 1,08096422  | 1069000000  |
|                                                        | GNPDA1                      | 1,080940851 | 1495100000  |
|                                                        | NUDT9                       | 1,080905799 | 213600000   |
|                                                        | RPS20                       | 1,080894116 | 33651000000 |
|                                                        | RPLP0;RPLP0P6               | 1,080882432 | 1,1447E+11  |
|                                                        | COX4NB;EMC8                 | 1,080859067 | 1882100000  |
|                                                        | SFRS15;SCAF4                | 1,080812339 | 214620000   |
|                                                        | CUL3                        | 1,0806605   | 2000200000  |
|                                                        | CNOT11                      | 1,080613789 | 810690000   |
|                                                        | RPL22L1                     | 1,080462006 | 17693000000 |
|                                                        | VT1A                        | 1,080415312 | 2798400000  |
|                                                        | ERCC4                       | 1,08035695  | 89356000    |
|                                                        | RPP14                       | 1,080135233 | 49291000    |
|                                                        |                             | 1,080135233 | 11388000000 |
|                                                        |                             | 1,0801119   | 48850000    |
|                                                        |                             | 1,080053571 | 89226000    |
|                                                        |                             | 1,079855299 | 2028800000  |
|                                                        |                             | 1,07976202  | 2287400000  |
| Group XIIA secretory phospholipase A2                  | PLA2G12A                    |             |             |
|                                                        | CIC                         |             |             |
| RNA-binding protein Musashi homolog 2                  | IGSF9B;MSI2                 |             |             |
| Programmed cell death protein 5                        | PDCD5                       |             |             |

|                                                                                                                                         |                             |             |             |
|-----------------------------------------------------------------------------------------------------------------------------------------|-----------------------------|-------------|-------------|
| Minor histocompatibility antigen H13                                                                                                    | HM13                        | 1,079563856 | 4118400000  |
| Disks large-associated protein 4                                                                                                        | DLGAP4                      | 1,079552202 | 506570000   |
| Endophilin-B1                                                                                                                           | SH3GLB1                     | 1,079493933 | 1454300000  |
| AT-rich interactive domain-containing protein 1A                                                                                        | ARID1A                      | 1,079412368 | 2011400000  |
| U5 small nuclear ribonucleoprotein 40 kDa protein                                                                                       | WDR57;SNRNP40               | 1,079365765 | 2269000000  |
| Annexin;Annexin A7                                                                                                                      | ANXA7                       | 1,079365765 | 10442000000 |
| Rho-associated protein kinase 2                                                                                                         | ROCK2                       | 1,079354114 | 3376500000  |
| ATPase ASNA1                                                                                                                            | ASNA1                       | 1,079330815 | 7822500000  |
| Ubiquitin carboxyl-terminal hydrolase 47                                                                                                | USP47                       | 1,079214332 | 2732500000  |
| F-actin-capping protein subunit alpha-2                                                                                                 | CAPZ2                       | 1,079074586 | 28521000000 |
| Heat shock 70 kDa protein 13                                                                                                            | HSPA13                      | 1,078737015 | 5889000000  |
| Methylsterol monooxygenase 1                                                                                                            | MSMO1                       | 1,078643929 | 823910000   |
| Src kinase-associated phosphoprotein 2                                                                                                  | SKAP2;SCAP2                 | 1,078609026 | 4808900000  |
| Myosin regulatory light chain 12A;Myosin regulatory light chain 12B;Myosin regulatory light polypeptide 9                               | MYL12A;MYL12B;MYL9          | 1,078550859 | 21164000000 |
| Myb-binding protein 1A                                                                                                                  | MYBBP1A                     | 1,078539226 | 4485500000  |
| DNA replication licensing factor MCM3                                                                                                   | HCC5;MCM3                   | 1,078353139 | 13592000000 |
| Proteasome activator complex subunit 3                                                                                                  | PSME3                       | 1,078260119 | 10789000000 |
| Nuclear distribution protein nudE homolog 1;Nuclear distribution protein nudE-like 1                                                    | NDE1;NDEL1                  | 1,07812062  | 802290000   |
| E3 ubiquitin-protein ligase ARIH2                                                                                                       | ARIH2                       | 1,078039262 | 2336600000  |
| Glycylpeptide N-tetradecanoyltransferase;Glycylpeptide N-tetradecanoyltransferase 1                                                     | NMT1                        | 1,077946297 | 3329000000  |
| Queuine tRNA-ribosyltransferase subunit QTRTD1                                                                                          | QTRTD1                      | 1,077806879 | 325910000   |
| Vesicle transport protein USE1                                                                                                          | USE1                        | 1,077806879 | 124200000   |
| RNA-binding protein 6                                                                                                                   | RBM6                        | 1,077783646 | 195270000   |
| Adenylyl cyclase-associated protein                                                                                                     | CAP1                        | 1,077737183 | 29149000000 |
| Tyrosine-protein phosphatase non-receptor type 11                                                                                       | PTPN11                      | 1,077667496 | 1316400000  |
| Inosine-5-monophosphate dehydrogenase 2                                                                                                 | IMPDH2                      | 1,077191546 | 11244000000 |
| Serine/threonine-protein kinase tousled-like 2                                                                                          | TLK2                        | 1,077029123 | 3402600000  |
| GTPase-activating protein and VPS9 domain-containing protein 1                                                                          | GAPVD1                      | 1,07683196  | 3082000000  |
| Putative heat shock protein HSP 90-alpha A5                                                                                             | HSP90AA5P                   | 1,076820365 | 530030000   |
| Glycylpeptide N-tetradecanoyltransferase;Glycylpeptide N-tetradecanoyltransferase 2                                                     | NMT2                        | 1,076681238 | 238720000   |
| Cytosolic purine 5-nucleotidase                                                                                                         | NT5C2                       | 1,076658053 | 3142400000  |
| 60S ribosomal protein L10a;Ribosomal protein                                                                                            | RPL10A                      | 1,076403091 | 1,0935E+11  |
| Nucleolin                                                                                                                               | NCL                         | 1,076345162 | 77048000000 |
| RRP15-like protein                                                                                                                      | RRP15                       | 1,07614825  | 144310000   |
| Heterogeneous nuclear ribonucleoprotein H2;Heterogeneous nuclear ribonucleoprotein H2, N-terminally processed                           | HNRNP2H2                    | 1,076090349 | 953020000   |
| 60S ribosomal protein L27a                                                                                                              | L27a;RPL27A                 | 1,076020875 | 8513900000  |
| Ubiquitin-associated domain-containing protein 1                                                                                        | UBAC1                       | 1,07595141  | 179430000   |
| Nuclear receptor corepressor 1                                                                                                          | NCOR1                       | 1,075858804 | 3449000000  |
| RNA-binding protein 26                                                                                                                  | RBM26                       | 1,075754642 | 250940000   |
| Ran GTPase-activating protein 1                                                                                                         | RANGAP1                     | 1,075673641 | 1690800000  |
| Mannose-6-phosphate utilization defect 1 protein                                                                                        | MPDU1;HBEBP2BPA             | 1,075604221 | 4773800000  |
| Protein unc-119 homolog A                                                                                                               | UNC119;DKFZp686E1393        | 1,075553481 | 918430000   |
| Histone-lysine N-methyltransferase EHMT2                                                                                                | EHMT2                       | 1,075500108 | 1897000000  |
| Muscleblind-like protein 1                                                                                                              | MBNL1                       | 1,075476974 | 8612600000  |
| Selenocysteine-specific elongation factor                                                                                               | EEFSEC                      | 1,075106973 | 1199900000  |
|                                                                                                                                         |                             | 1,074887406 | 966830000   |
| 26S proteasome non-ATPase regulatory subunit 5                                                                                          | PSMD5                       | 1,074864298 | 2428200000  |
| Vacuolar fusion protein CCZ1 homolog;Vacuolar fusion protein CCZ1 homolog B                                                             | DKFZp586i1023;CCZ1;CCZ1B    | 1,074783431 | 443480000   |
| CXXC-type zinc finger protein 1                                                                                                         | CXXC1                       | 1,074679477 | 659390000   |
| Peptidyl-prolyl cis-trans isomerase-like 4                                                                                              | PPL4                        | 1,07439082  | 951630000   |
| N-alpha-acetyltransferase 35, NatC auxiliary subunit                                                                                    | NAA35                       | 1,074136931 | 526240000   |
| RNA polymerase-associated protein LEO1                                                                                                  | LEO1                        | 1,074113856 | 695730000   |
| MOB kinase activator 3A                                                                                                                 | MOB3A;DKFZp686N2312         | 1,073917759 | 207520000   |
| Serine/threonine-protein kinase ATR                                                                                                     | ATR                         | 1,073837034 | 2909500000  |
| 40S ribosomal protein SA                                                                                                                | RPSA;RPSAP58                | 1,073802442 | 1,4181E+11  |
| 60S ribosomal protein L17                                                                                                               | RPL17                       | 1,073802442 | 51258000000 |
| Myosin light chain 1/3, skeletal muscle isoform;Myosin light chain 3                                                                    | MYL1;MYL3                   | 1,073617985 | 630270000   |
| Midasin                                                                                                                                 | MDN1                        | 1,073617985 | 3645300000  |
| Elongation factor 2                                                                                                                     | EEF2                        | 1,073306858 | 1,691E+11   |
| GPN-loop GTPase 2                                                                                                                       | GPN2                        | 1,073295339 | 679340000   |
| ADP-ribosylation factor GTPase-activating protein 1                                                                                     | ARFGAP1                     | 1,073283819 | 590730000   |
| 60S ribosomal protein L12                                                                                                               | RPL12;hCG_21173             | 1,073237744 | 66063000000 |
| Proline synthase co-transcribed bacterial homolog protein                                                                               | PROSC                       | 1,073226225 | 3817100000  |
| Spejgren syndrome/scleroderma autoantigen 1                                                                                             | SSSCA1                      | 1,072731174 | 683890000   |
| OTU domain-containing protein 6B                                                                                                        | OTUD6B                      | 1,072616111 | 1536900000  |
| Tether containing UBX domain for GLUT4                                                                                                  | ASPSR1                      | 1,072478068 | 2099600000  |
| Ubiquitin thioesterase OTUB2                                                                                                            | OTUB2                       | 1,072443563 | 429630000   |
| SWI/SNF complex subunit SMARCC1                                                                                                         | SMARCC1                     | 1,072190593 | 73284000000 |
| Pre-mRNA-splicing factor SLU7                                                                                                           | SLU7                        | 1,072121621 | 461030000   |
| Serine/arginine-rich splicing factor 11                                                                                                 | SFRS11;SRSF11;DKFZp686D0211 | 1,071983706 | 1570200000  |
| Reactive oxygen species modulator 1                                                                                                     | ROMO1                       | 1,071845826 | 157710000   |
| CTP synthase 1;CTP synthase                                                                                                             | CTPS1                       | 1,071845826 | 4100900000  |
| Heterogeneous nuclear ribonucleoprotein L-like                                                                                          | HNRPLL;HNRNPLL              | 1,071730953 | 20355000000 |
| SWI/SNF-related matrix-associated actin-dependent regulator of chromatin subfamily D member 1                                           | SMARCD1                     | 1,071375003 | 902280000   |
| Regulation of nuclear pre-mRNA domain-containing protein 1B                                                                             | RPRD1B                      | 1,07129466  | 4481400000  |
| Importin subunit beta-1                                                                                                                 | KPNB1                       | 1,071248755 | 50864000000 |
| Serine/threonine-protein phosphatase 4 regulatory subunit 1                                                                             | PPP4R1                      | 1,070893125 | 195860000   |
| Spermine synthase                                                                                                                       | SMS                         | 1,070881657 | 3723300000  |
| Importin-8                                                                                                                              | IPO8                        | 1,070847254 | 531240000   |
| Probable 26S rRNA (cytosine-C(5))-methyltransferase                                                                                     | NSUN5                       | 1,070778456 | 227610000   |
| Zinc finger E-box-binding homeobox 1                                                                                                    | ZEB1                        | 1,07074406  | 765770000   |
| Putative tRNA pseudouridine synthase Pus10                                                                                              | PUS10                       | 1,070652348 | 271510000   |
| Transmembrane protein 87A                                                                                                               | TMEM87A                     | 1,070572114 | 291720000   |
| U6 snRNA-associated Sm-like protein LSM5                                                                                                | LSM5                        | 1,07041168  | 482610000   |
| Islet cell autoantigen 1                                                                                                                | ICA1                        | 1,070297114 | 602640000   |
| Pre-mRNA-splicing factor 38B                                                                                                            | PRPF38B                     | 1,070239841 | 1609500000  |
| Protein SET                                                                                                                             | SET                         | 1,070194026 | 1,184E+11   |
| Sialic acid synthase                                                                                                                    | NANS                        | 1,070125312 | 5574100000  |
| Splicing factor 3A subunit 1                                                                                                            | SF3A1                       | 1,070033706 | 7692800000  |
| DNA-directed RNA polymerase III subunit RPC3                                                                                            | POLR3C                      | 1,069987909 | 404220000   |
| Protein CASC3                                                                                                                           | CASC3                       | 1,069781871 | 329330000   |
| Phosphatidylinositol transfer protein alpha isoform                                                                                     | PITPNA                      | 1,069655999 | 6750600000  |
| Protein quaking                                                                                                                         | QKI                         | 1,069575913 | 1305100000  |
| Protein transport protein Sec23A                                                                                                        | SEC23A                      | 1,069553034 | 2207000000  |
| C-Myc-binding protein                                                                                                                   | MYCBP                       | 1,06949584  | 790270000   |
| Tyrosine-protein kinase receptor;Protein TFG                                                                                            | TFG;TFG/ALK fusion          | 1,069072793 | 15529000000 |
| Nucleoporin NDC1                                                                                                                        | NDC1                        | 1,068924235 | 301630000   |
| Endoplasmic reticulum lectin 1                                                                                                          | ERLEC1                      | 1,068878533 | 139570000   |
| Double-strand break repair protein MRE11A                                                                                               | MRE11A                      | 1,068867108 | 517740000   |
| DnaJ homolog subfamily B member 1                                                                                                       | DNAJB1                      | 1,068872922 | 980910000   |
| Selenium-binding protein 1                                                                                                              | SELENBP1                    | 1,068581565 | 787860000   |
| Haloacid dehalogenase-like hydrolase domain-containing protein 2                                                                        | HDHD2                       | 1,068387483 | 2434400000  |
| RNA-binding protein 14                                                                                                                  | RBM14                       | 1,068319    | 1865400000  |
| Actin-like protein 6A                                                                                                                   | BAF53A;ACTL6A               | 1,068284762 | 4183900000  |
| KDEL motif-containing protein 1                                                                                                         | KDEL1                       | 1,068125013 | 159270000   |
| Vacuolar protein sorting-associated protein 4A                                                                                          | VPS4A;DKFZp434E0418         | 1,068125013 | 516770000   |
| Helicase SKI2W                                                                                                                          | SKI2L;SKI2W                 | 1,068090788 | 1339500000  |
| Acidic leucine-rich nuclear phosphoprotein 32 family member A;Acidic leucine-rich nuclear phosphoprotein 32 family member ANP32A;ANP32D | ANP32A;ANP32D               | 1,067988124 | 7396300000  |

|                                                                                                                                          |                        |             |             |
|------------------------------------------------------------------------------------------------------------------------------------------|------------------------|-------------|-------------|
| SH3 domain-binding glutamic acid-rich-like protein 3                                                                                     | SH3BGLR3;HEL-S-297     | 1,067919692 | 3948000000  |
| Tyrosyl-DNA phosphodiesterase 1                                                                                                          | TDP1                   | 1,067839867 | 126520000   |
| 40S ribosomal protein S14                                                                                                                | RPS14                  | 1,067828464 | 4709800000  |
| Methionine adenosyltransferase 2 subunit beta                                                                                            | MAT2B                  | 1,067794257 | 1994200000  |
| Thioredoxin-like protein 1                                                                                                               | TXNL1                  | 1,06771445  | 1845900000  |
| WD repeat domain phosphoinositide-interacting protein 1                                                                                  | WIPI1                  | 1,067429523 | 23574000    |
| Mediator of RNA polymerase II transcription subunit 8                                                                                    | MED8                   | 1,067418129 | 354950000   |
| Eukaryotic translation initiation factor 2 subunit 2                                                                                     | EIF2S2                 | 1,067395342 | 17555000000 |
| Torsin-1A-interacting protein 1                                                                                                          | TOR1AIP1               | 1,06721308  | 39059000    |
| Histidine triad nucleotide-binding protein 1                                                                                             | HINT1                  | 1,066962571 | 8667900000  |
| Probable tRNA N6-adenosine threonylcarbamoyltransferase                                                                                  | OSGEP                  | 1,066700801 | 811680000   |
| Peptidylprolyl isomerase domain and WD repeat-containing protein 1                                                                       | PPWD1                  | 1,066700801 | 340580000   |
| Reticulon;Reticulon-3                                                                                                                    | RTN3                   | 1,066564276 | 12089000000 |
| Proto-oncogene c-Rel                                                                                                                     | REL                    | 1,066461906 | 14741000    |
| Putative heat shock protein HSP 90-beta 2                                                                                                | HSP90AB2P              | 1,066336813 | 13386000000 |
| SWI/SNF-related matrix-associated actin-dependent regulator of chromatin subfamily E member 1                                            | SMARCE1                | 1,066336813 | 579640000   |
| Transcription initiation factor IIE subunit beta                                                                                         | GTF2E2                 | 1,066268593 | 1257400000  |
| Adapter molecule crk                                                                                                                     | CRK                    | 1,066109447 | 1639700000  |
| DnaJ homolog subfamily C member 3                                                                                                        | DNAJC3                 | 1,06605262  | 2115600000  |
| Lys-63-specific deubiquitinase BRCC36                                                                                                    | BRCC36                 | 1,065825375 | 1486500000  |
| 60S ribosomal protein L31                                                                                                                | RPL31                  | 1,065711789 | 29740000000 |
| A-kinase anchor protein 13                                                                                                               | AKAP13                 | 1,065689075 | 175090000   |
| Trafficking protein particle complex subunit 13                                                                                          | C5orf44;TRAPPC13       | 1,065439281 | 248360000   |
| Bifunctional methylenetetrahydrofolate dehydrogenase/cyclohydrolase, mitochondrial;NAD-dependent methylenetetrahydrofolate dehydrogenase | MTTHFD2                | 1,065427929 | 4657500000  |
| Poly(pyrimidine tract-binding protein 1                                                                                                  | PTBP1                  | 1,065257686 | 15822000000 |
| Ubiquitin carboxyl-terminal hydrolase 25                                                                                                 | USP25                  | 1,065155566 | 780180000   |
| 40S ribosomal protein S12                                                                                                                | RPS12                  | 1,065030779 | 50388000000 |
| Dynactin subunit 6                                                                                                                       | DCTN6                  | 1,065019437 | 438630000   |
| Leucine zipper transcription factor-like protein 1                                                                                       | LZTF1L                 | 1,064974068 | 492130000   |
| Serine/threonine-protein phosphatase 2A 55 kDa regulatory subunit B alpha isoform;Serine/threonine-protein phosphatase 2                 | PPP2R2A                | 1,064894682 | 5968500000  |
| S-formylglutathione hydrolase                                                                                                            | ESD                    | 1,064633926 | 7892000000  |
| S-adenosylmethionine synthase isoform type-2;S-adenosylmethionine synthase                                                               | MAT2A                  | 1,064475267 | 14321000000 |
| DNA repair protein RAD50                                                                                                                 | RAD50                  | 1,064418615 | 4420900000  |
| RANBP2-like and GRIP domain-containing protein 5/6                                                                                       | RGPD5                  | 1,064067504 | 510190000   |
| Synaptobrevin homolog YKT6                                                                                                               | YKT6                   | 1,063988254 | 4671800000  |
| U3 small nucleolar RNA-interacting protein 2                                                                                             | RRP9                   | 1,063841105 | 442340000   |
|                                                                                                                                          |                        | 1,063705311 | 692760000   |
| 60S ribosomal protein L9                                                                                                                 | RPL9                   | 1,063682682 | 62350000000 |
| E3 ubiquitin-protein ligase TRIM56                                                                                                       | TRIM56                 | 1,063512996 | 74995000    |
| LIM domain-containing protein 2                                                                                                          | LIMD2                  | 1,063456446 | 718520000   |
| Eukaryotic translation initiation factor 4H                                                                                              | EIF4H;WBSCR1;LOC392647 | 1,063264221 | 11413000000 |
| 40S ribosomal protein S7                                                                                                                 | RPS7                   | 1,063230306 | 1,0512E+11  |
| GA-binding protein alpha chain                                                                                                           | GABPA;GABPAP           | 1,062936468 | 573570000   |
| Protein kinase C;Protein kinase C alpha type                                                                                             | PRKCA                  | 1,062902574 | 482750000   |
| SRSF protein kinase 1                                                                                                                    | SRPK1                  | 1,062857386 | 2712800000  |
| Myosin-11                                                                                                                                | MYH11                  | 1,062834793 | 514040000   |
| High mobility group protein B2                                                                                                           | HMGB2                  | 1,062778315 | 30453000000 |
| Mediator of RNA polymerase II transcription subunit 20                                                                                   | TRFP;MED20             | 1,06271055  | 455420000   |
| Activator of 90 kDa heat shock protein ATPase homolog 1                                                                                  | AHSA1                  | 1,062518594 | 14134000000 |
| Spermatogenesis-associated protein 5                                                                                                     | SPATA5                 | 1,062473438 | 84129000    |
| Selenide, water dikinase 1                                                                                                               | SEPHS1                 | 1,062405711 | 3176300000  |
| 60S ribosomal protein L5                                                                                                                 | RPL5                   | 1,062146173 | 77997000000 |
| Brefeldin A-inhibited guanine nucleotide-exchange protein 2                                                                              | ARFGEF2                | 1,062134891 | 885050000   |
| Protein PRRC2A                                                                                                                           | PRRC2A                 | 1,062089768 | 2570700000  |
| 60S ribosomal protein L7a                                                                                                                | RPL7A;RP-L7a           | 1,062033369 | 87567000000 |
| Evolutionarily conserved signaling intermediate in Toll pathway, mitochondrial                                                           | ECESIT                 | 1,062010811 | 66401000    |
| Pre-mRNA-splicing factor RBM22                                                                                                           | RBM22                  | 1,061875484 | 445160000   |
| NEDD8-activating enzyme E1 catalytic subunit                                                                                             | UBE1C;UBA3             | 1,061864209 | 5283600000  |
| Exocyst complex component 7                                                                                                              | DKFZp686P1551;EXOC7    | 1,061830383 | 390570000   |
| Importin-5                                                                                                                               | IPO5                   | 1,061819108 | 46697000000 |
| COP9 signalosome complex subunit 2                                                                                                       | COPS2                  | 1,061706374 | 9401400000  |
| T-complex protein 1 subunit beta                                                                                                         | CCT2                   | 1,061582395 | 52834000000 |
| Importin-11                                                                                                                              | IPO11                  | 1,061503514 | 1251300000  |
| Biorientation of chromosomes in cell division protein 1-like 1                                                                           | BOD1L1                 | 1,061503514 | 36558000    |
| Aflatoxin B1 aldehyde reductase member 2                                                                                                 | AKR7A2                 | 1,061413378 | 969040000   |
| Spectrin alpha chain, erythrocytic 1                                                                                                     | SPTA1                  | 1,061413378 | 299310000   |
| Interferon regulatory factor 2-binding protein 1                                                                                         | IRF2BP1                | 1,061334522 | 23387000    |
| Serine/threonine-protein phosphatase 2A 65 kDa regulatory subunit A alpha isoform                                                        | PPP2R1A                | 1,061210629 | 18401000000 |
| ER membrane protein complex subunit 6                                                                                                    | EMC6                   | 1,061165584 | 502080000   |
| CTD nuclear envelope phosphatase 1                                                                                                       | CTDNBP1;hCG_1987397    | 1,061109284 | 75331000    |
| Coiled-coil domain-containing protein 93                                                                                                 | CCDC93                 | 1,060884141 | 375640000   |
| Large subunit GTPase 1 homolog                                                                                                           | LSG1                   | 1,060861632 | 245270000   |
| Synaptic vesicle membrane protein VAT-1 homolog                                                                                          | VAT1                   | 1,060839124 | 9936500000  |
| Protein unc-45 homolog A                                                                                                                 | UNC45A                 | 1,060771605 | 1141000000  |
| Gamma-tubulin complex component 4                                                                                                        | TUBGCP4                | 1,060704095 | 11312000    |
| Nucleoplasmin-3                                                                                                                          | NPM3                   | 1,060659094 | 3462600000  |
| Regulator complex protein LAMTOR3                                                                                                        | LAMTOR3                | 1,060625345 | 817650000   |
| Flap endonuclease 1                                                                                                                      | FEN1                   | 1,060535358 | 6772100000  |
| DnaJ homolog subfamily A member 2                                                                                                        | DNAJA2                 | 1,060512864 | 11003000000 |
| 60S ribosomal protein L4                                                                                                                 | RPL4                   | 1,060186805 | 78327000000 |
| E3 ubiquitin-protein ligase RBX1;E3 ubiquitin-protein ligase RBX1, N-terminally processed                                                | RBX1                   | 1,060085655 | 1410500000  |
| Transcription elongation regulator 1                                                                                                     | TCERG1                 | 1,059838481 | 11041000000 |
| Host cell factor 1;HCF N-terminal chain 1;HCF N-terminal chain 2;HCF N-terminal chain 3;HCF N-terminal chain 4;HCF N-terminal chain 5    | HCFC1                  | 1,059827248 | 8381000000  |
| SUMO-conjugating enzyme UBC9                                                                                                             | UBE2I                  | 1,059816016 | 7568400000  |
| Serine/threonine-protein phosphatase 4 regulatory subunit 3A                                                                             | SMEK1                  | 1,059804784 | 883610000   |
| Protein kinase C iota type                                                                                                               | PRKCI                  | 1,059748628 | 37515000    |
| Ribosomal protein L19;60S ribosomal protein L19                                                                                          | RPL19                  | 1,059737397 | 28972000000 |
|                                                                                                                                          | LOC202789              | 1,059703707 | 92403000    |
| Radixin                                                                                                                                  | RDX                    | 1,059670019 | 6958700000  |
| Interleukin enhancer-binding factor 2                                                                                                    | ILF2                   | 1,059647561 | 6766200000  |
| WD repeat domain phosphoinositide-interacting protein 2                                                                                  | WIPI2                  | 1,059344478 | 583150000   |
| Regulator of G-protein signaling 18                                                                                                      | RGS18                  | 1,059333256 | 1070500000  |
| Probable D-tyrosyl-tRNA(Tyr) deacylase 2                                                                                                 | DTD2                   | 1,058963063 | 278490000   |
| Zinc finger protein ZPR1                                                                                                                 | ZPR1                   | 1,058895783 | 63072000    |
| Oxysterol-binding protein;Oxysterol-binding protein-related protein 2                                                                    | OSBPL2                 | 1,058884571 | 42661000    |
| LIM and senescent cell antigen-like-containing domain protein 1;LIM and senescent cell antigen-like-containing domain protein 2          | LIMS1;LIMS2            | 1,058671579 | 1368700000  |
| Heterogeneous nuclear ribonucleoprotein Q                                                                                                | SYNCRIP                | 1,058581924 | 20427000000 |
| Transcription elongation factor SPT4                                                                                                     | SUPT4H1                | 1,058548307 | 242620000   |
| 60S ribosomal protein L13a;Putative 60S ribosomal protein L13a protein RPL13AP3                                                          | RPL13A;RPL13a;RPL13AP3 | 1,058413861 | 28392000000 |
| Sodium/potassium-transporting ATPase subunit alpha-2                                                                                     | ATP1A2                 | 1,058290649 | 12931000000 |
| Ethylmalonyl-CoA decarboxylase                                                                                                           | ECHDC1                 | 1,058223454 | 703110000   |
| Lysophospholipid acyltransferase 7                                                                                                       | MBOAT7                 | 1,058212256 | 1154900000  |
| Polyadenylate-binding protein 1-like                                                                                                     | PABPC1L                | 1,058178663 | 49124000    |
| Stromal membrane-associated protein 1                                                                                                    | SMAP1                  | 1,058156269 | 493730000   |
| Bis(5-adenosyl)-triphosphatase ENPP4;Ectonucleotide pyrophosphatase/phosphodiesterase family member 7                                    | ENPP4;ENPP7            | 1,058033116 | 226210000   |
| Cell cycle checkpoint protein RAD1                                                                                                       | RAD1                   | 1,058033116 | 249200000   |
| Eukaryotic peptide chain release factor subunit 1                                                                                        | ETF1                   | 1,057999534 | 23947000000 |
| T-complex protein 1 subunit delta                                                                                                        | CCT4                   | 1,057865228 | 58448000000 |

|                                                                                                                                           |                             |             |             |
|-------------------------------------------------------------------------------------------------------------------------------------------|-----------------------------|-------------|-------------|
| Serine/arginine-rich splicing factor 3                                                                                                    | SFRS3;SRSF3                 | 1,057697393 | 1167200000  |
| ATP-dependent RNA helicase DHX36                                                                                                          | DHX36                       | 1,057585532 | 1391200000  |
| Mediator of RNA polymerase II transcription subunit 23                                                                                    | MED23                       | 1,057451331 | 2076000000  |
| Elongation factor 1-gamma                                                                                                                 | EEF1G                       | 1,057350702 | 1,5735E+11  |
| Splicing factor 3A subunit 2                                                                                                              | SF3A2                       | 1,057339522 | 1367500000  |
| ATP-citrate synthase                                                                                                                      | ACLY variant protein;ACLY   | 1,057305984 | 24893000000 |
| Hydroxypyruvate isomerase;Putative hydroxypyruvate isomerase                                                                              | HYI                         | 1,057250093 | 60687000    |
| 60S ribosomal protein L23a                                                                                                                | RPL23A                      | 1,057171854 | 66171000000 |
| Adenosine kinase                                                                                                                          | ADK                         | 1,057138327 | 2094700000  |
| Lariat debranching enzyme                                                                                                                 | DBR1                        | 1,057093627 | 172740000   |
| Proliferating cell nuclear antigen                                                                                                        | PCNA                        | 1,056948379 | 62360000000 |
| Tyrosine-protein kinase CSK                                                                                                               | CSK                         | 1,056724998 | 2017800000  |
| Ubiquitin carboxyl-terminal hydrolase;Ubiquitin carboxyl-terminal hydrolase 28                                                            | USP28                       | 1,056658002 | 47949000    |
| Obg-like ATPase 1                                                                                                                         | OLA1;PTD004                 | 1,056624507 | 26524000000 |
| Hsp90 co-chaperone Cdc37;Hsp90 co-chaperone Cdc37, N-terminally processed                                                                 | CDC37;MBD5                  | 1,056367785 | 9980000000  |
| 40S ribosomal protein S28                                                                                                                 | RPS28                       | 1,056356626 | 15839000000 |
| Superkiller viralicidic activity 2-like 2                                                                                                 | SKIV2L2                     | 1,056311992 | 5517300000  |
| SET and MYND domain-containing protein 5                                                                                                  | SMYD5                       | 1,056311992 | 572650000   |
| Prefoldin subunit 1                                                                                                                       | PFDN1                       | 1,056233892 | 1452700000  |
| Exocyst complex component 4                                                                                                               | EXOC4                       | 1,056200425 | 1622100000  |
| Ubiquitin thioesterase otulin                                                                                                             | OTULIN                      | 1,056155804 | 92534000    |
| Protein-glutamine gamma-glutamyltransferase 2                                                                                             | TGM2                        | 1,056066574 | 1707800000  |
| DNA-(apurinic or apyrimidic site) lyase;DNA-(apurinic or apyrimidic site) lyase, mitochondrial                                            | APEX1                       | 1,05588816  | 20257000000 |
| Transmembrane and coiled-coil domain-containing protein 1                                                                                 | TMCO1                       | 1,055854714 | 4730600000  |
| DnaJ homolog subfamily A member 1                                                                                                         | DNAAJ1;HDJ2                 | 1,055843566 | 9933600000  |
| Transcription elongation factor SPT6                                                                                                      | SUPT6H                      | 1,055843566 | 1036100000  |
| CLIP-associating protein 2                                                                                                                | CLASP2                      | 1,055776682 | 2894600000  |
| SPRY domain-containing protein 7                                                                                                          | SPRYD7                      | 1,055754389 | 494920000   |
| Casein kinase II subunit alpha;Casein kinase II subunit alpha 3                                                                           | CSNK2A1;CSNK2A3             | 1,055687516 | 18992000000 |
| RNA-binding protein NOB1                                                                                                                  | NOB1                        | 1,055609509 | 4509000000  |
| 40S ribosomal protein S5;40S ribosomal protein S5, N-terminally processed                                                                 | RPS5                        | 1,055531513 | 99168000000 |
| 39S ribosomal protein L1, mitochondrial                                                                                                   | MRPL1                       | 1,05549809  | 133640000   |
| Spectrin beta chain, non-erythrocytic 1                                                                                                   | SPTBN1                      | 1,055475808 | 41611000000 |
| Arylamine N-acetyltransferase 2                                                                                                           | NAT2                        | 1,055397832 | 65361000    |
| Nucleolar RNA helicase 2                                                                                                                  | DDX21                       | 1,055130572 | 2703400000  |
| B-cell lymphoma/leukemia 10                                                                                                               | BCL10                       | 1,05507491  | 159540000   |
| TGF-beta-activated kinase 1 and MAP3K7-binding protein 1                                                                                  | MAP3K7IP1;TAB1              | 1,054985863 | 298590000   |
| TAR DNA-binding protein 43                                                                                                                | TARDBP                      | 1,054930216 | 11966000000 |
| Leucine-rich repeat-containing protein 47                                                                                                 | LRRC47                      | 1,054885703 | 1368200000  |
| Anaphase-promoting complex subunit 4                                                                                                      | ANAPC4                      | 1,054852321 | 277230000   |
| Putative histone H2B type 2-D;Putative histone H2B type 2-C                                                                               | HIST2H2BD;HIST2H2BC         | 1,054830067 | 15138000000 |
|                                                                                                                                           |                             | 1,054796688 | 8380400     |
| Multidrug resistance protein 1                                                                                                            | ABCB1                       | 1,054785562 | 284300000   |
| Filamin A-interacting protein 1-like                                                                                                      | FILIP1L                     | 1,054741061 | 39645000    |
| WD repeat-containing protein 26                                                                                                           | WDR26                       | 1,054729936 | 1205800000  |
| Ubiquitin carboxyl-terminal hydrolase;Ubiquitin carboxyl-terminal hydrolase 19                                                            | USP19                       | 1,054718812 | 929390000   |
| 60S ribosomal protein L6                                                                                                                  | RPL6                        | 1,054607581 | 59083000000 |
| DNA-directed RNA polymerases I, II, and III subunit RPABC3                                                                                | POLR2H                      | 1,054329605 | 2389500000  |
| Eukaryotic translation initiation factor 5B                                                                                               | EIF5B                       | 1,054318489 | 16135000000 |
| Transcription elongation factor SPT5                                                                                                      | SUPT5H                      | 1,054174002 | 4405600000  |
| Histone-lysine N-methyltransferase EHMT1                                                                                                  | EHMT1                       | 1,054062885 | 51346000    |
| Rab GTPase-binding effector protein 2                                                                                                     | RABEP2                      | 1,053974009 | 257240000   |
| Peptidyl-prolyl cis-trans isomerase FKBP4;Peptidyl-prolyl cis-trans isomerase FKBP4, N-terminally processed                               | FKBP4                       | 1,053940684 | 8118000000  |
| T-complex protein 1 subunit epsilon                                                                                                       | CCT5                        | 1,053885148 | 26112000000 |
| Exportin-4                                                                                                                                | XPO4                        | 1,053785196 | 3079700000  |
| Tyrosine-protein phosphatase non-receptor type;Tyrosine-protein phosphatase non-receptor type 2                                           | PTPN2                       | 1,053674162 | 1013400000  |
| Putative uncharacterized protein C11orf40                                                                                                 | C11orf40                    | 1,053552051 | 2135000000  |
| POTE ankyrin domain family member 1                                                                                                       | POTE1                       | 1,053529852 | 371940000   |
| Zinc finger CCCH domain-containing protein 15                                                                                             | ZC3H15                      | 1,053385581 | 1681200000  |
| Core histone macro-H2A.1;Histone H2A                                                                                                      | H2AFY                       | 1,053319008 | 5477400000  |
| Guanine nucleotide-binding protein subunit beta-2-like 1;Guanine nucleotide-binding protein subunit beta-2-like 1, N-terminally processed | GNB2L1                      | 1,053119339 | 1,459E+11   |
| Uncharacterized protein C1orf50                                                                                                           | C1orf50                     | 1,052919746 | 208390000   |
| Interferon-related developmental regulator 2                                                                                              | IFRD2                       | 1,052897574 | 243400000   |
| Cell division cycle 5-like protein                                                                                                        | CDC5L                       | 1,052853232 | 3076600000  |
| Derlin-1                                                                                                                                  | DERL1                       | 1,052842147 | 1931500000  |
| Uncharacterized protein C19orf43                                                                                                          | C19orf43                    | 1,052842147 | 1101800000  |
| 60S ribosomal protein L11                                                                                                                 | RPL11                       | 1,052842147 | 61419000000 |
| Nuclease-sensitive element-binding protein 1                                                                                              | YBX1                        | 1,052753477 | 19922000000 |
| Osteoclast-stimulating factor 1                                                                                                           | OSTF1                       | 1,052698065 | 13329000000 |
| Zinc finger protein 148                                                                                                                   | ZNF148;tb protein           | 1,052675902 | 87596000    |
| E3 ubiquitin-protein ligase BRE1B                                                                                                         | RNF40                       | 1,05265374  | 1002500000  |
| Peptidyl-prolyl cis-trans isomerase NIMA-interacting 1                                                                                    | PIN1                        | 1,052310347 | 2430600000  |
| Exocyst complex component 6                                                                                                               | EXOC6;DKFZp76112124;SEC15L3 | 1,052254982 | 202760000   |
| Presenilin;Presenilin-1;Presenilin-1 NTF subunit;Presenilin-1 CTF subunit;Presenilin-1 CTF 12;Presenilin-2;Presenilin-2 NTF               | PSEN2;PSEN1                 | 1,052232838 | 16658000    |
| Eukaryotic translation initiation factor 4 gamma 3                                                                                        | EIF4G3                      | 1,05214427  | 762560000   |
| Ras-related protein Rab-38                                                                                                                | RAB38                       | 1,052088923 | 976960000   |
| Uncharacterized aarF domain-containing protein kinase 5                                                                                   | ADCK5                       | 1,052022513 | 38577000    |
| Ubiquitin carboxyl-terminal hydrolase 14;Ubiquitin carboxyl-terminal hydrolase                                                            | USP14                       | 1,051867591 | 6051000000  |
| Bifunctional coenzyme A synthase;Phosphopantetheine adenylyltransferase;Dephospho-CoA kinase                                              | COASY                       | 1,051856527 | 171330000   |
| tRNA pseudouridine synthase;tRNA pseudouridine synthase A, mitochondrial                                                                  | PUS1                        | 1,051856527 | 663620000   |
| Splicing factor U2AF 65 kDa subunit                                                                                                       | U2AF2                       | 1,05175689  | 6280000000  |
| ATP-binding cassette sub-family F member 3                                                                                                | ABCF3                       | 1,051734837 | 462970000   |
| Structural maintenance of chromosomes protein 3                                                                                           | SMC3                        | 1,051712714 | 21217000000 |
| Synergin gamma                                                                                                                            | SYNRG                       | 1,051690593 | 184880000   |
| Protein transport protein Sec24A                                                                                                          | SEC24A                      | 1,051469429 | 1213400000  |
| Protein kish-A                                                                                                                            | TMEM167A                    | 1,051358881 | 1409300000  |
| WD repeat-containing protein 44                                                                                                           | WDR44;DKFZp761M142          | 1,051314669 | 360490000   |
| 60S ribosomal protein L8                                                                                                                  | RPL8                        | 1,051292564 | 86226000000 |
| 60S ribosomal protein L35                                                                                                                 | RPL35;LOC154880             | 1,051259409 | 21952000000 |
| NHL repeat-containing protein 2                                                                                                           | DKFZp779F115;NHLRC2         | 1,051049473 | 87371000    |
| Codanin-1                                                                                                                                 | CDAN1                       | 1,050939014 | 10501000    |
| NudC domain-containing protein 3                                                                                                          | NUDC3;KIAA1068              | 1,050828578 | 501130000   |
| Translational activator GCN1                                                                                                              | PRIC295;GCN1L1              | 1,050751287 | 28800000000 |
| NAD(P)H-hydrate epimerase                                                                                                                 | APOA1BP                     | 1,050729206 | 140090000   |
| Integrator complex subunit 4                                                                                                              | INTS4                       | 1,050674007 | 462030000   |
| Peptidyl-prolyl cis-trans isomerase FKBP8                                                                                                 | FKBP8                       | 1,050662968 | 985540000   |
| Rho GTPase-activating protein 28                                                                                                          | ARHGAP28                    | 1,050365002 | 81786000    |
| Tyrosine-protein phosphatase non-receptor type 23                                                                                         | PTPN23                      | 1,050320873 | 1456900000  |
| Omega-amidase NIT2                                                                                                                        | NIT2                        | 1,050265717 | 1705800000  |
| Cohesin subunit SA-2                                                                                                                      | STAG2;DKFZp686P16143;DKFZp6 | 1,050221597 | 3100100000  |
| Heterogeneous nuclear ribonucleoprotein H;Heterogeneous nuclear ribonucleoprotein H, N-terminally processed                               | HNRNPH1                     | 1,050133367 | 19426000000 |
| Oligosaccharyltransferase complex subunit OSTC                                                                                            | OSTC                        | 1,050111312 | 2880700000  |
| RUN and FYVE domain-containing protein 1                                                                                                  | RUFY1                       | 1,050012075 | 219700000   |
|                                                                                                                                           |                             | 1,049593283 | 130860000   |
| Sorting nexin-5                                                                                                                           | SNX5                        | 1,049516173 | 4460200000  |
| 60S ribosomal protein L15;Ribosomal protein L15                                                                                           | RPL15                       | 1,049439075 | 44537000000 |
| Protein arginine N-methyltransferase 6                                                                                                    | PRMT6                       | 1,049406036 | 200370000   |
| Transcriptional activator protein Pur-alpha                                                                                               | PURA                        | 1,049373    | 5864100000  |

|                                                                                                                               | 15-Sep                        |             |             |
|-------------------------------------------------------------------------------------------------------------------------------|-------------------------------|-------------|-------------|
| 15 kDa selenoprotein                                                                                                          |                               | 1,049328954 | 1013400000  |
| Microtubule-associated protein;Microtubule-associated protein 4                                                               | MAP4;DKFZp547H1810            | 1,049306933 | 1768100000  |
| 40S ribosomal protein S26;Putative 40S ribosomal protein S26-like 1                                                           | RPS26;RPS26P11                | 1,049042748 | 24052000000 |
| 60S ribosomal protein L24                                                                                                     | RPL24                         | 1,048998731 | 42771000000 |
| Prefoldin subunit 5                                                                                                           | PFDN5                         | 1,048921708 | 2454000000  |
| Huntingtin-interacting protein K                                                                                              | HYPK                          | 1,048822697 | 957940000   |
| Mediator of RNA polymerase II transcription subunit 15                                                                        | DKFZp762B1216;DKFZp686A2214;  | 1,048811696 | 569840000   |
| Heat shock cognate 71 kDa protein                                                                                             | HSPA8                         | 1,048723703 | 3,7689E+11  |
|                                                                                                                               | WUGSC:H_RG054D04.1            | 1,048701707 | 16871000000 |
| 60S ribosomal protein L27                                                                                                     | RPL27                         | 1,048701707 | 55926000000 |
| NudC domain-containing protein 1                                                                                              | NUDCD1                        | 1,048668715 | 369910000   |
| Splicing factor 3B subunit 3                                                                                                  | SF3B3                         | 1,048580746 | 34624000000 |
| Acidic leucine-rich nuclear phosphoprotein 32 family member B                                                                 | ANP32B                        | 1,048525773 | 32120000000 |
| Serine/threonine-protein kinase RIO3                                                                                          | RIOK3                         | 1,048525773 | 549860000   |
| Glucose-6-phosphate isomerase                                                                                                 | GPI                           | 1,048514779 | 17569000000 |
| Protein arginine N-methyltransferase 5;Protein arginine N-methyltransferase 5;Protein arginine N-methyltransferase 5, N-ter   | PRMT5                         | 1,048415844 | 3920500000  |
| Beta-arrestin-1                                                                                                               | ARRB1                         | 1,048360888 | 111700000   |
| Dual specificity mitogen-activated protein kinase kinase 4                                                                    | MAP2K4                        | 1,048294948 | 1214800000  |
| TBC1 domain family member 9B                                                                                                  | TBC1D9B                       | 1,048250993 | 1547900000  |
| N-alpha-acetyltransferase 50                                                                                                  | NAA50                         | 1,048207042 | 7625100000  |
| Luc7-like protein 3                                                                                                           | CROP;LUC7L3                   | 1,048130136 | 1991100000  |
| Gem-associated protein 5                                                                                                      | GEMIN5                        | 1,04811915  | 3043100000  |
| Kinesin light chain 1                                                                                                         | KNS2;KLC1                     | 1,048042257 | 185340000   |
| Peptidyl-prolyl cis-trans isomerase;Peptidyl-prolyl cis-trans isomerase H                                                     | PPIH                          | 1,047932429 | 2586500000  |
| Transcriptional repressor CTCF                                                                                                | CTCF                          | 1,047910467 | 412150000   |
| Spliceosome-associated protein CWC15 homolog                                                                                  | CWC15                         | 1,047899485 | 935440000   |
| Exocyst complex component 2                                                                                                   | EXOC2                         | 1,047877524 | 545590000   |
| U6 snRNA-associated Sm-like protein LSm8                                                                                      | LSM8                          | 1,047855564 | 2049600000  |
| 60S ribosomal protein L38                                                                                                     | RPL38                         | 1,047767731 | 23757000000 |
| Eukaryotic translation initiation factor 4 gamma 1                                                                            | EIF4G1;EIF4G1 variant protein | 1,047701866 | 22681000000 |
| Serine/threonine-protein phosphatase 6 regulatory subunit 1                                                                   | PPP6R1                        | 1,047657961 | 261260000   |
| U4/U6 small nuclear ribonucleoprotein Prp3                                                                                    | PRPF3                         | 1,047570161 | 833500000   |
| Ribonuclease P protein subunit p30                                                                                            | RPP30                         | 1,047482376 | 1406200000  |
| Probable ATP-dependent RNA helicase YTHDC2                                                                                    | YTHDC2                        | 1,047449461 | 829930000   |
| 3-mercaptopyruvate sulfurtransferase                                                                                          | MPST                          | 1,047416547 | 387560000   |
| Mannose-6-phosphate isomerase                                                                                                 | MPI                           | 1,047087526 | 707630000   |
| BRISC complex subunit Abro1                                                                                                   | FAM175B                       | 1,046901173 | 344300000   |
| Death-inducer obliterator 1                                                                                                   | DIDO1                         | 1,046846375 | 187410000   |
| Alpha-soluble NSF attachment protein                                                                                          | NAPA                          | 1,046835417 | 8624100000  |
| 40S ribosomal protein S6                                                                                                      | RPS6                          | 1,0468135   | 53484000000 |
| Probable ATP-dependent RNA helicase DDX31                                                                                     | DDX31                         | 1,0468135   | 75375000    |
| Protein FAM3C                                                                                                                 | FAM3C                         | 1,046791584 | 2056700000  |
| Double-strand-break repair protein rad21 homolog                                                                              | RAD21                         | 1,046791584 | 945840000   |
| T-complex protein 1 subunit eta                                                                                               | CTT7                          | 1,046747755 | 41578000000 |
| Cytosine-specific methyltransferase;DNA (cytosine-5)-methyltransferase 1                                                      | DNMT1                         | 1,046211146 | 2023300000  |
| Cleavage stimulation factor subunit 2 tau variant                                                                             | CSTF2T                        | 1,045948518 | 69973000    |
| Leucine-rich repeat-containing protein 57                                                                                     | LRRCS7                        | 1,045839129 | 363560000   |
| 40S ribosomal protein S13                                                                                                     | RPS13                         | 1,04576257  | 69431000000 |
| Regulator complex protein LAMTOR5                                                                                             | LAMTOR5                       | 1,04565322  | 240280000   |
| Ubiquitin-like protein 4A                                                                                                     | UBL4A                         | 1,04565322  | 683770000   |
| 40S ribosomal protein S25                                                                                                     | RPS25                         | 1,045642286 | 56189000000 |
| Vesicle-associated membrane protein 3;Vesicle-associated membrane protein 2                                                   | VAMP3;VAMP2                   | 1,045609486 | 940150000   |
| GTPase KRas;GTPase KRas, N-terminally processed                                                                               | KRAS                          | 1,045543892 | 482020000   |
| Importin-7                                                                                                                    | IPO7                          | 1,045369015 | 35783000000 |
| Charged multivesicular body protein 4b                                                                                        | CHMP4B                        | 1,04510681  | 665950000   |
| Glucose-induced degradation protein 4 homolog                                                                                 | GID4                          | 1,045063122 | 693940000   |
| Probable ubiquitin carboxyl-terminal hydrolase FAF-X;Ubiquitin carboxyl-terminal hydrolase;Probable ubiquitin carboxyl-termi  | USP9X;USP9Y                   | 1,0450522   | 12347000000 |
| Ubiquitin-like modifier-activating enzyme 6                                                                                   | UBA6                          | 1,045019437 | 2401400000  |
| Regulator of nonsense transcripts 2                                                                                           | UPF2                          | 1,044877488 | 2076400000  |
| Eukaryotic translation initiation factor 3 subunit F                                                                          | EIF3F                         | 1,044779238 | 22661000000 |
| Trifunctional purine biosynthetic protein adenosine-3;Phosphoribosylamine--glycine ligase;Phosphoribosylformylglycinamidin    | GART                          | 1,044746492 | 8424200000  |
| 40S ribosomal protein S17-like;40S ribosomal protein S17                                                                      | RPS17L;RPS17                  | 1,044724663 | 49606000000 |
| Probable methyltransferase TARBP1                                                                                             | TARBP1                        | 1,044713748 | 806340000   |
| COP9 signalosome complex subunit 7a                                                                                           | COPS7A                        | 1,044615529 | 4681200000  |
| 60S ribosomal protein L23                                                                                                     | RPL23                         | 1,044615529 | 47752000000 |
| Serine/threonine-protein phosphatase 2A activator                                                                             | PPP2R4;DKFZp781M17165         | 1,044451872 | 5641200000  |
| THO complex subunit 6 homolog                                                                                                 | THOC6                         | 1,044408238 | 1273800000  |
| Sorting nexin-27                                                                                                              | SNX27                         | 1,044408238 | 329220000   |
| Sphingomyelin phosphodiesterase 4                                                                                             | SMPD4                         | 1,044266455 | 417850000   |
| Myosin-9                                                                                                                      | MYH9                          | 1,044244646 | 3,3168E+11  |
| Peptidyl-prolyl cis-trans isomerase;Peptidyl-prolyl cis-trans isomerase A;Peptidyl-prolyl cis-trans isomerase A, N-terminally | PPIA                          | 1,044244646 | 2,6751E+11  |
| Phosphomannomutase;Phosphomannomutase 2                                                                                       | PMM2                          | 1,044157417 | 4244700000  |
| Box C/D snoRNA protein 1                                                                                                      | SNHIT6                        | 1,044135612 | 32885000    |
| Protein cornichon homolog 4                                                                                                   | CNIH4                         | 1,043950308 | 544070000   |
| 60S ribosomal protein L14                                                                                                     | RPL14                         | 1,043841336 | 20048000000 |
| 40S ribosomal protein S3a                                                                                                     | RPS3A                         | 1,043808649 | 1,0522E+11  |
| Platelet-activating factor acetylhydrolase IB subunit alpha                                                                   | PAFAH1B1                      | 1,043797754 | 17336000000 |
| ELAV-like protein 1                                                                                                           | ELAVL1                        | 1,043667028 | 3048600000  |
| Signal transducer and activator of transcription;Signal transducer and activator of transcription 5B                          | STAT5B                        | 1,043634352 | 2496400000  |
| Baculoviral IAP repeat-containing protein 6                                                                                   | BIRC6                         | 1,043590787 | 4751700000  |
| Symplekin                                                                                                                     | SYMFK;SYMFK variant protein   | 1,043579896 | 11499000000 |
| Eukaryotic translation initiation factor 3 subunit E                                                                          | EIF3S6;EIF3E                  | 1,043547226 | 32776000000 |
| Glutathione reductase, mitochondrial                                                                                          | GSR                           | 1,04342745  | 3192100000  |
| E3 ubiquitin-protein ligase TRIP12                                                                                            | TRIP12                        | 1,043351244 | 2405000000  |
|                                                                                                                               |                               | 1,043144455 | 37327000    |
| Deubiquitinating protein VCIP135                                                                                              | VCIP1                         | 1,043122692 | 2925500000  |
| COP9 signalosome complex subunit 4                                                                                            | COPS4                         | 1,043024772 | 7837100000  |
| Uroporphyrinogen decarboxylase                                                                                                | UROD                          | 1,042981258 | 671960000   |
| Protein SMG7                                                                                                                  | SMG7;SGA56M                   | 1,042937747 | 314450000   |
| Putative prolyl-HRNA synthetase associated domain-containing protein 1                                                        | PRORSD1P                      | 1,042861612 | 630530000   |
| 60S ribosomal protein L26;60S ribosomal protein L26-like 1                                                                    | RPL26;KRBA2;RPL26L1           | 1,042839862 | 59493000000 |
| General transcription factor IIF subunit 2                                                                                    | GTF2F2                        | 1,042785489 | 5364600000  |
| Dipeptidyl peptidase 3                                                                                                        | DKFZp686O1117;DPP3            | 1,042785489 | 5775200000  |
| Lysosome membrane protein 2                                                                                                   | SCARB2                        | 1,04267676  | 241280000   |
| Eukaryotic translation initiation factor 3 subunit A                                                                          | EIF3A;eIF3a                   | 1,042546315 | 95766000000 |
| Serine/threonine-protein phosphatase 2A 56 kDa regulatory subunit alpha isoform                                               | PPP2R5A                       | 1,04245937  | 3264000000  |
| T-complex protein 1 subunit theta                                                                                             | CTT8                          | 1,04232898  | 46083000000 |
| DNA-directed RNA polymerase II subunit RPB7                                                                                   | POLR2G                        | 1,042166038 | 723330000   |
| Integrator complex subunit 9                                                                                                  | INTS9                         | 1,042090016 | 88367000    |
| ATP-binding cassette sub-family F member 2                                                                                    | ABCF2                         | 1,042024863 | 4404600000  |
| Eukaryotic translation initiation factor 3 subunit M                                                                          | EIF3M                         | 1,041775185 | 22571000000 |
| Ubiquitin carboxyl-terminal hydrolase isozyme L3                                                                              | UCHL3                         | 1,041764332 | 11188000000 |
| Nardilysin                                                                                                                    | NRD1                          | 1,041731775 | 4185500000  |
| T-complex protein 1 subunit alpha                                                                                             | TCP1                          | 1,041688369 | 49895000000 |
| Filamin-C                                                                                                                     | FLNC                          | 1,041623266 | 4923000000  |
| Bifunctional UDP-N-acetylglucosamine 2-epimerase/N-acetylmannosamine kinase;UDP-N-acetylglucosamine 2-epimerase               | (GNE                          | 1,041536475 | 637270000   |
| Polyadenylate-binding protein 1                                                                                               | PABPC1                        | 1,041471391 | 44133000000 |
| Phosphoserine phosphatase                                                                                                     | PSPH                          | 1,04131956  | 993280000   |

|                                                                                                                       |                               |             |             |
|-----------------------------------------------------------------------------------------------------------------------|-------------------------------|-------------|-------------|
| Ubiquitin-conjugating enzyme E2 G2                                                                                    | DKFZp586L2318;UBE2G2          | 1,041297874 | 258970000   |
| Biliverdin reductase A                                                                                                | BLVRA                         | 1,041254503 | 2711600000  |
| HEAT repeat-containing protein 5A                                                                                     | HEATR5A                       | 1,041200296 | 628330000   |
| Eukaryotic translation initiation factor 3 subunit G                                                                  | EIF3G;EIF3S4                  | 1,041167774 | 8548100000  |
| Elongation factor 1-alpha 2                                                                                           | EEF1A2                        | 1,041026869 | 3904200000  |
| Cleavage and polyadenylation specificity factor subunit 6                                                             | CPF5F6                        | 1,040810167 | 4294100000  |
| Apoptotic protease-activating factor 1                                                                                | APAF1                         | 1,040777669 | 1026100000  |
| Ras-related protein Rap-1A                                                                                            | RAP1A                         | 1,040604383 | 2728400000  |
| Gamma-aminobutyric acid receptor-associated protein                                                                   | GABARAP                       | 1,040485282 | 358980000   |
| Pleiotropic regulator 1                                                                                               | PLRG1                         | 1,040474456 | 664780000   |
| WW domain-binding protein 2                                                                                           | WBP2                          | 1,040452805 | 232810000   |
| Heterogeneous nuclear ribonucleoproteins C1/C2                                                                        | HNRNPC;hCG_1641229            | 1,040452805 | 9303500000  |
| 1-phosphatidylinositol 3-phosphate 5-kinase                                                                           | PIKFYVE                       | 1,040344562 | 212800000   |
| Tight junction protein ZO-2                                                                                           | TJP2                          | 1,040333739 | 4150100000  |
| Translation initiation factor eIF-2B subunit beta                                                                     | EIF2B2                        | 1,040322916 | 1102100000  |
| YEATS domain-containing protein 2                                                                                     | YEATS2                        | 1,040301271 | 42949000    |
| Ras-related protein Rab-8A                                                                                            | RAB8A                         | 1,040149782 | 5246100000  |
| Ankyrin repeat domain-containing protein 17                                                                           | ANKRD17                       | 1,040149782 | 3960000000  |
| Espin                                                                                                                 | ESPN                          | 1,040138963 | 835690000   |
| Nitriase homolog 1                                                                                                    | NIT1                          | 1,040117325 | 331700000   |
| 60S ribosomal protein L21                                                                                             | RPL21                         | 1,040117325 | 8296300000  |
| Guanine nucleotide-binding protein G(i) subunit alpha-2;Guanine nucleotide-binding protein G(i) subunit alpha-1       | GNAI2;WUGSC_H_LUCA16.1;GNAI   | 1,040095689 | 21571000000 |
| Liprin-alpha-2                                                                                                        | PPFIA2;PPFIA2 variant protein | 1,040009152 | 117730000   |
| Conserved oligomeric Golgi complex subunit 8                                                                          | COG8                          | 1,039846935 | 220070000   |
| DNA-directed RNA polymerases 1, II, and III subunit RPABC5                                                            | POLR2L                        | 1,039814497 | 4384400000  |
| Conserved oligomeric Golgi complex subunit 4                                                                          | COG4                          | 1,039717197 | 195050000   |
| Adapter molecule crk                                                                                                  | CRK                           | 1,039609107 | 196580000   |
| Prefoldin subunit 3                                                                                                   | VBP1                          | 1,03943621  | 6423900000  |
| Cleavage and polyadenylation specificity factor subunit 3                                                             | CPF5F3                        | 1,039306575 | 1664500000  |
| Rho guanine nucleotide exchange factor 2                                                                              | ARHGEF2                       | 1,039295773 | 3352500000  |
| Transcription activator BRG1                                                                                          | SMARCA4                       | 1,03920937  | 6297000000  |
| Cytoskeleton-associated protein 5                                                                                     | KCAP5                         | 1,039166173 | 5852200000  |
| Transmembrane 9 superfamily member 3                                                                                  | SMBP;TM9SF3                   | 1,038993423 | 4268100000  |
| 40S ribosomal protein S21                                                                                             | RPS21                         | 1,038809939 | 8398300000  |
| 6-phosphofructo-2-kinase/fructose-2,6-bisphosphatase 3;6-phosphofructo-2-kinase;Fructose-2,6-bisphosphatase           | PFKFB3                        | 1,038809939 | 95285000    |
| U2 small nuclear ribonucleoprotein A                                                                                  | SNRPA1                        | 1,038777567 | 18212000000 |
| Eukaryotic translation initiation factor 3 subunit H                                                                  | EIF3S3;EIF3H                  | 1,03862652  | 16492000000 |
| Eukaryotic translation initiation factor 1A, X-chromosomal;Eukaryotic translation initiation factor 1A, Y-chromosomal | EIF1AX;EIF1AY                 | 1,038594159 | 10452000000 |
| GTP-binding protein 1                                                                                                 | GTPBP1                        | 1,038389251 | 1650500000  |
| Peptidyl-prolyl cis-trans isomerase;Peptidyl-prolyl cis-trans isomerase F, mitochondrial                              | PIPF                          | 1,038346122 | 2809100000  |
| General transcription factor IIH subunit 4                                                                            | GTTF2H4                       | 1,038227538 | 521590000   |
| ATP-dependent RNA helicase DHX29                                                                                      | DHX29                         | 1,03820598  | 1652600000  |
| Rotatin                                                                                                               | RTTN                          | 1,038130535 | 7525400000  |
| Striatin                                                                                                              | STRN                          | 1,038130535 | 433840000   |
| PDZ and LIM domain protein 1                                                                                          | PDLIM1                        | 1,038119757 | 2107300000  |
| 60S ribosomal protein L18                                                                                             | RPL18                         | 1,037915036 | 26159000000 |
| Uncharacterized protein C7orf26                                                                                       | C7orf26                       | 1,037871947 | 295180000   |
| Protein TSSC1                                                                                                         | TSSC1                         | 1,037861176 | 451050000   |
| Protein MON2 homolog                                                                                                  | MON2                          | 1,037818091 | 1161900000  |
| Sister chromatid cohesion protein PDS5 homolog B                                                                      | PDS5B                         | 1,037742702 | 5920800000  |
| Cofilin-2                                                                                                             | CFI2                          | 1,037656556 | 42816000000 |
| Heterogeneous nuclear ribonucleoprotein A/B                                                                           | HNRNPAB                       | 1,037462781 | 19176000000 |
| HEAT repeat-containing protein 1;HEAT repeat-containing protein 1, N-terminally processed                             | HEATR1                        | 1,037441255 | 429940000   |
| COP9 signalosome complex subunit 1                                                                                    | GPS1                          | 1,037355159 | 1813500000  |
| Protein-lysine methyltransferase METTL21D                                                                             | VCPKMT                        | 1,037344398 | 268030000   |
| Rho-related GTP-binding protein RhoC                                                                                  | RHOC                          | 1,037312117 | 259730000   |
| Nucleoprotein TPR                                                                                                     | TPR                           | 1,037301357 | 20558000000 |
| Talin-1                                                                                                               | TLN1                          | 1,03724756  | 5,3203E+11  |
| TSC22 domain family protein 2                                                                                         | TSC22D2                       | 1,037226043 | 146020000   |
| Serine/threonine-protein phosphatase PP1-beta catalytic subunit;Serine/threonine-protein phosphatase                  | PPP1CB                        | 1,037204526 | 4169300000  |
| Aminoacyl tRNA synthase complex-interacting multifunctional protein 1;Endothelial monocyte-activating polypeptide 2   | AIMP1                         | 1,037183011 | 6489800000  |
| Nuclear factor NF-kappa-B p105 subunit;Nuclear factor NF-kappa-B p50 subunit                                          | NFKB1                         | 1,037172254 | 369030000   |
| Methionine aminopeptidase 1                                                                                           | METAP1;DKFZp781C0419          | 1,037053937 | 1232100000  |
| Splicing factor 3A subunit 3                                                                                          | SF3A3                         | 1,037000166 | 3511500000  |
| Translocation protein SEC63 homolog                                                                                   | SEC63                         | 1,036978659 | 2885700000  |
| CCA tRNA nucleotidyltransferase 1, mitochondrial                                                                      | TRNT1                         | 1,0369464   | 3478600000  |
| Abl interactor 1                                                                                                      | ABI1                          | 1,036903392 | 191760000   |
| 60S ribosomal protein L35a                                                                                            | RPL35A                        | 1,036838886 | 20232000000 |
| Methyltransferase-like protein 13                                                                                     | SEC22B                        | 1,036709897 | 860910000   |
| 40S ribosomal protein S3                                                                                              | feat;METTL13                  | 1,036613177 | 274490000   |
| Dynactin subunit 4                                                                                                    | RPS3                          | 1,036602432 | 1,9034E+11  |
| Ras-related GTP-binding protein A;Ras-related GTP-binding protein B                                                   | DCTN4                         | 1,036559452 | 531910000   |
| Aldose reductase                                                                                                      | RRAGA;RRAGB                   | 1,036280169 | 2379400000  |
| GRIP and coiled-coil domain-containing protein 2                                                                      | AKR1B1                        | 1,036258692 | 20402000000 |
| Putative pre-mRNA-splicing factor ATP-dependent RNA helicase DHX16                                                    | GCC2                          | 1,036258692 | 81135000    |
| E3 ubiquitin-protein ligase BRE1A                                                                                     | DBP2;DHX16                    | 1,036162056 | 357900000   |
| Probable ATP-dependant RNA helicase DDX23                                                                             | RNF20                         | 1,036162056 | 1938900000  |
| GPALPP motifs-containing protein 1                                                                                    | DDX23                         | 1,036001036 | 807960000   |
| SH3 domain-binding protein 1                                                                                          | GPALPP1                       | 1,035990303 | 56982000    |
| Cullin-4A                                                                                                             | SH3BP1                        | 1,035958106 | 340970000   |
| Histone deacetylase 2;Histone deacetylase                                                                             | CUL4A                         | 1,035915179 | 574660000   |
| 40S ribosomal protein S2                                                                                              | HDAC2                         | 1,035915179 | 515210000   |
| Regulator complex protein LAMTOR4;Regulator complex protein LAMTOR4, N-terminally processed                           | RPS2;rsps2                    | 1,035904448 | 1,1282E+11  |
| Chloride intracellular channel protein 1                                                                              | LAMTOR4                       | 1,035872256 | 480030000   |
| Ubiquitin thioesterase OTUB1                                                                                          | CLIC1                         | 1,035797149 | 242290000   |
| Ubiquitin carboxyl-terminal hydrolase 16                                                                              | OTUB1;DKFZp564E242            | 1,035539723 | 52307000000 |
| Serine/arginine-rich splicing factor 5                                                                                | USP16                         | 1,035529    | 20298000000 |
| Kinectin                                                                                                              | SRSF5                         | 1,035368177 | 103610000   |
| 28 kDa heat- and acid-stable phosphoprotein                                                                           | KTN1                          | 1,035282425 | 4425800000  |
| Heterogeneous nuclear ribonucleoproteins A2/B1                                                                        | PDAP1                         | 1,035228837 | 2372600000  |
| Rab-like protein 3                                                                                                    | KTN1                          | 1,035207404 | 2497300000  |
| 40S ribosomal protein S4;40S ribosomal protein S4, X isoform                                                          | HNRNPA2B1                     | 1,035164539 | 48885000000 |
| E3 ubiquitin-protein ligase AMFR                                                                                      | RABL3                         | 1,035132393 | 332700000   |
| 60S ribosomal protein L7                                                                                              | RPS4X                         | 1,035014542 | 1,4619E+11  |
| Type 2 phosphatidylinositol 4,5-bisphosphate 4-phosphatase                                                            | AMFR                          | 1,034993117 | 85804000    |
| Mitochondrial import inner membrane translocase subunit Tim8 A                                                        | RPL7                          | 1,034971694 | 55210000000 |
| Exportin-1                                                                                                            | TMEM55A                       | 1,034896717 | 367430000   |
| Elongation factor Tu GTP-binding domain-containing protein 1                                                          | TIMM8A                        | 1,034864588 | 1372400000  |
| Heterogeneous nuclear ribonucleoprotein D0                                                                            | XPO1                          | 1,034832461 | 23414000000 |
| 5-3 exoribonuclease 1                                                                                                 | EFTUD1                        | 1,034811044 | 1011300000  |
| Amidophosphoribosyltransferase                                                                                        | HNRNPD                        | 1,034768212 | 25757000000 |
| Prenylcysteine oxidase 1                                                                                              | XRN1                          | 1,034736091 | 720550000   |
| Rab GDP dissociation inhibitor alpha                                                                                  | PPAT                          | 1,034725384 | 4300100000  |
| Transformation/transcription domain-associated protein                                                                | PCYOX1                        | 1,034703971 | 146350000   |
| Dipeptidyl peptidase 9                                                                                                | GD11                          | 1,034382887 | 1190600000  |
| Chromosome transmission fidelity protein 18 homolog                                                                   | TRRAP                         | 1,034340091 | 7215300000  |
|                                                                                                                       | DDP9                          | 1,034265206 | 436080000   |
|                                                                                                                       | RUVBL;CHTF18                  | 1,034233116 | 115470000   |



|                                                                                                                               |                             |             |                            |
|-------------------------------------------------------------------------------------------------------------------------------|-----------------------------|-------------|----------------------------|
| Cullin-1                                                                                                                      | CUL1                        | 1,034019233 | 7713900000                 |
| Metaxin-2                                                                                                                     | MTX2                        | 1,033997849 | 1783600000                 |
| Hippocalcin-like protein 1                                                                                                    | HPCAL1;DKFZp781K1922        | 1,033976467 | 8318000000                 |
| Required for meiotic nuclear division protein 1 homolog                                                                       | RMND1                       | 1,033944394 | 4419200000                 |
| Arf-GAP with SH3 domain, ANK repeat and PH domain-containing protein 1                                                        | ASAP1                       | 1,033880256 | 7039000000                 |
| Myosin-14                                                                                                                     | MYH14                       | 1,033837501 | 8856000000                 |
| F-actin-capping protein subunit beta                                                                                          | CAPZB                       | 1,033837501 | 49597000000                |
| Nicastrin                                                                                                                     | NCSTN                       | 1,033741317 | 10245000000                |
| Protein phosphatase methyltransferase 1                                                                                       | PPME1                       | 1,033741317 | 22244000000                |
| Eukaryotic translation initiation factor 3 subunit L                                                                          | EIF3L                       | 1,033719945 | 197470000000               |
| RNA polymerase II subunit A C-terminal domain phosphatase                                                                     | CTDP1                       | 1,03347423  | 6853900000                 |
| ER membrane protein complex subunit 3                                                                                         | EMC3                        | 1,033431509 | 28746000000                |
| Ras-related protein Rab-31                                                                                                    | RAB31                       | 1,033367434 | 2739300000                 |
| ADP-ribosylation factor-binding protein GGA1                                                                                  | GGA1                        | 1,033303368 | 1478600000                 |
| Glomulin                                                                                                                      | GLMN                        | 1,033196607 | 1589800000                 |
| N-acetylgalactosaminyltransferase 7                                                                                           | GALNT7                      | 1,033185932 | 2324900000                 |
| Prefoldin subunit 6                                                                                                           | PFDN6;HKE2                  | 1,033121888 | 21102000000                |
| Thioredoxin, mitochondrial                                                                                                    | TXN2                        | 1,033004494 | 12387000000                |
| Eukaryotic translation initiation factor 3 subunit I                                                                          | EIF3S2;EIF3I                | 1,032961811 | 279060000000               |
| Protein LSM14 homolog A                                                                                                       | LSM14A                      | 1,032919133 | 5446800000                 |
| Nurim                                                                                                                         | NRM                         | 1,032130214 | 3626700000                 |
| T-complex protein 1 subunit zeta                                                                                              | CCT6A                       | 1,032119561 | 411480000000               |
| U6 snRNA-associated Sm-like protein Lsm3                                                                                      | LSM3                        | 1,032044997 | 17109000000                |
| Protein disulfide-isomerase;Protein disulfide-isomerase A3                                                                    | PDI3A                       | 1,032013045 | 393490000000               |
| Katanin p60 ATPase-containing subunit A-like 2                                                                                | KATNAL2                     | 1,031981094 | 44843000000                |
| DNA-directed RNA polymerase II subunit RPB3                                                                                   | POLR2C                      | 1,031917199 | 121490000000               |
| 40S ribosomal protein S8                                                                                                      | RP58                        | 1,031853312 | 1,1193E+11                 |
| Probable 18S rRNA (guanine-N(7))-methyltransferase                                                                            | WBSCR22                     | 1,031842665 | 3151100000                 |
| Ubiquitin-like modifier-activating enzyme 1                                                                                   | UBA1                        | 1,031672341 | 774030000000               |
| Serine/threonine-protein kinase PAK 2;PAK-2p27;PAK-2p34                                                                       | PAK2                        | 1,031651054 | 59091000000                |
| Guanine nucleotide-binding protein G(I)/G(S)/G(T) subunit beta-1                                                              | GNB1                        | 1,031608484 | 112330000000               |
|                                                                                                                               | FP3184                      | 1,031565917 | 4318600000                 |
| ARF GTPase-activating protein GIT2                                                                                            | GIT2                        | 1,031512713 | 4930000000                 |
| WD repeat-containing protein 82                                                                                               | WDR82                       | 1,031416961 | 38563000000                |
| Zinc phosphodiesterase ELAC protein 2                                                                                         | ELAC2                       | 1,031353135 | 6880800000                 |
| CGG triplet repeat-binding protein 1                                                                                          | CGGBP1                      | 1,031278682 | 12083000000                |
| Eukaryotic translation initiation factor 2 subunit 1                                                                          | EIF2S1                      | 1,031182973 | 475530000000               |
| Cleavage and polyadenylation specificity factor subunit 7                                                                     | CPSP7                       | 1,031161707 | 7663200000                 |
|                                                                                                                               | FBXO31                      | 1,031076665 | 11380000000                |
| COMM domain-containing protein 9                                                                                              | COMM9                       | 1,030895952 | 70816000000                |
| Mitochondrial import inner membrane translocase subunit Tim10 B                                                               | FXC1;TIMM10B                | 1,030832191 | 19997000000                |
| 60S ribosomal protein L36a;60S ribosomal protein L36a-like                                                                    | RPL36A;RPL36A-HNRRNP2;RPL36 | 1,030821565 | 115390000000               |
| Prolyl endopeptidase                                                                                                          | PREP                        | 1,030694069 | 130270000000               |
| Heat shock 70 kDa protein 4                                                                                                   | HSPA4;HS24/p52              | 1,030683446 | 448180000000               |
| Inhibitor of nuclear factor kappa-B kinase subunit alpha                                                                      | CHUK                        | 1,030672823 | 61309000000                |
| E3 ubiquitin-protein ligase ARIH1                                                                                             | ARIH1                       | 1,030577226 | 86265000000                |
| Mitochondrial import inner membrane translocase subunit Tim17-A                                                               | TIMM17A;TIM17A              | 1,030439173 | 171900000000               |
| Elongation factor G, mitochondrial                                                                                            | GFM1                        | 1,03040732  | 68367000000                |
| Adenylate kinase 2, mitochondrial;Adenylate kinase 2, mitochondrial;Adenylate kinase 2, mitochondrial, N-terminally processed | AK2                         | 1,030269312 | 142860000000               |
| Chromodomain-helicase-DNA-binding protein 3                                                                                   | CHD3                        | 1,030195016 | 32906000000                |
| GTP synthase 2                                                                                                                | CTPS2                       | 1,03017379  | 23635000000                |
| Wiskott-Aldrich syndrome protein family member 2                                                                              | WASF2                       | 1,030067675 | 240300000000               |
| Choline/ethanolamine kinase                                                                                                   | CHKB                        | 1,030014626 | 179360000000               |
| Eukaryotic initiation factor 4A-III;Eukaryotic initiation factor 4A-III, N-terminally processed                               | EIF4A3                      | 1,029950974 | 1129300000000              |
| WD repeat domain phosphoinositide-interacting protein 3                                                                       | WDR45L;WDR45B               | 1,029940366 | 389800000000               |
| GSK3-beta interaction protein                                                                                                 | GSKIP                       | 1,029929759 | 680750000000               |
| Charged multivesicular body protein 1a                                                                                        | CHMP1A                      | 1,029919151 | 875220000000               |
| Proliferation-associated protein 2G4                                                                                          | PA2G4                       | 1,02988733  | 1,0327E+11                 |
| GTP-binding nuclear protein Ran                                                                                               | RAN                         | 1,029855511 | 1,7594E+11                 |
| Conserved oligomeric Golgi complex subunit 3                                                                                  | COG3                        | 1,029717651 | 193740000000               |
| Spectrin alpha chain, non-erythrocytic 1                                                                                      | SPTAN1                      | 1,029707048 | 5617900000000              |
| DNA primase;DNA primase small subunit                                                                                         | PRIM1                       | 1,02967524  | 173580000000               |
| Zinc finger CCH domain-containing protein 4                                                                                   | ZC3H4                       | 1,029643434 | 422860000000               |
| DNA-directed RNA polymerase;DNA-directed RNA polymerase III subunit RPC2                                                      | DKFZp686D10173;POLR3B       | 1,029484434 | 1259000000000              |
| A-kinase anchor protein 10, mitochondrial                                                                                     | AKAP10                      | 1,029484434 | 234630000000               |
| Pantothenate kinase 4                                                                                                         | PANK4                       | 1,029463238 | 149680000000               |
| Actin-related protein 2/3 complex subunit 1A                                                                                  | ARPC1A                      | 1,02945264  | 331640000000               |
| 5-nucleotidase domain-containing protein 3                                                                                    | NT5DC3                      | 1,02920895  | 1160400000000              |
| Mannosyl-oligosaccharide glucosidase                                                                                          | GCS1;MOGS                   | 1,02920895  | 2286400000000              |
| Ataxin-2                                                                                                                      | ATXN2                       | 1,02920895  | 265100000000               |
| 6-phosphogluconate dehydrogenase, decarboxylating                                                                             | PGD                         | 1,029198357 | 2293100000000              |
| F-box only protein 22                                                                                                         | FBXO22                      | 1,029177173 | 4869200000000              |
| Mitogen-activated protein kinase 14                                                                                           | MAPK14                      | 1,028848924 | 6286400000000              |
| Saccharopine dehydrogenase-like oxidoreductase                                                                                | SCCPDH                      | 1,028774832 | 2086000000000              |
| Zinc finger CCH domain-containing protein 18                                                                                  | ZC3H18                      | 1,028721916 | 1863200000000              |
| COP9 signalosome complex subunit 5                                                                                            | COPS5                       | 1,028658424 | 8544400000000              |
| WD repeat-containing protein 1                                                                                                | WDR1                        | 1,028658424 | 8678500000000              |
| 26S protease regulatory subunit 10B                                                                                           | PSMC6                       | 1,028594939 | 25143000000000             |
| E3 ubiquitin-protein ligase UBR5                                                                                              | UBR5                        | 1,028584359 | 37864000000000             |
| Heterogeneous nuclear ribonucleoprotein A3                                                                                    | HNRPA3;HNRNPA3;D10S102      | 1,028552621 | 33214000000000             |
| Terminal uridylyltransferase 7                                                                                                | ZCCHC6                      | 1,028531463 | 23918000000000             |
| Coiled-coil domain-containing protein 47                                                                                      | CCDC47                      | 1,028499727 | 20479000000000             |
| Kinesin-like protein KIF7                                                                                                     | KIF7                        | 1,028499727 | 27762000000000             |
| Annexin;Annexin A11                                                                                                           | ANXA11                      | 1,028489149 | 19906000000000             |
| Dr1-associated corepressor                                                                                                    | DRAP1                       | 1,028415109 | 40194000000000             |
| Peptidyl-prolyl cis-trans isomerase FKBP5                                                                                     | FKBP5                       | 1,028288209 | 54910000000000             |
| Ubiquitin-like modifier-activating enzyme 5                                                                                   | UBA5                        | 1,02822477  | 87834000000000             |
| Bridging integrator 3                                                                                                         | BIN3                        | 1,028108486 | 79547000000000             |
| Ras-related protein R-Ras2                                                                                                    | RRAS2                       | 1,027685857 | 158530000000000            |
| CDKN2A-interacting protein                                                                                                    | CDKN2AIP                    | 1,027590813 | 198690000000000            |
| Rho GTPase-activating protein 17                                                                                              | ARHGAP17                    | 1,027495787 | 498600000000000            |
| Ubiquinone biosynthesis protein COQ9, mitochondrial                                                                           | COQ9                        | 1,02742189  | 1228900000000000           |
| Cytokine receptor-like factor 3                                                                                               | CRLF3                       | 1,027284681 | 7541600000000000           |
| Ras-related protein Rap-2c                                                                                                    | RAP2C                       | 1,027063113 | 9366900000000000           |
| Ribonucleases P/MRP protein subunit POP1                                                                                      | POP1                        | 1,026989278 | 23382000000000000          |
| Catechol O-methyltransferase domain-containing protein 1                                                                      | COMT1                       | 1,026947092 | 64017000000000000          |
| Copine-1                                                                                                                      | CPNE1                       | 1,026926    | 264640000000000000         |
| Rho-related GTP-binding protein RhoG                                                                                          | ARHG;RHOG                   | 1,026831097 | 2301600000000000000        |
| C-Jun-amino-terminal kinase-interacting protein 4                                                                             | SPAG9                       | 1,026799466 | 2570800000000000000        |
| Twinfilin-1                                                                                                                   | TWF1                        | 1,026767838 | 38496000000000000000       |
| Actin, cytoplasmic 2;Actin, cytoplasmic 2, N-terminally processed                                                             | ACTG1                       | 1,026757295 | 1,7989E+12                 |
|                                                                                                                               | OKKNS-cl6                   | 1,026715128 | 41266000000000000000       |
| Trafficking protein particle complex subunit 9                                                                                | TRAPP9                      | 1,026620263 | 607270000000000000000      |
| Condensin complex subunit 3                                                                                                   | NCAPG                       | 1,026578107 | 2215300000000000000000     |
| AP-3 complex subunit mu-1                                                                                                     | AP3M1;DKFZp586G1518         | 1,026535954 | 23625000000000000000000    |
| Alpha-1,6-mannosyl-glycoprotein 2-beta-N-acetylglucosaminyltransferase                                                        | MGAT2                       | 1,026483268 | 406580000000000000000000   |
| Elongation factor 1-delta                                                                                                     | EEF1D                       | 1,026451659 | 5740000000000000000000000  |
| Tetrapeptide repeat protein 37                                                                                                | TTC37                       | 1,026409517 | 53797000000000000000000000 |

|                                                                                                                                                                    |                      |             |             |
|--------------------------------------------------------------------------------------------------------------------------------------------------------------------|----------------------|-------------|-------------|
| Serine/threonine-protein kinase VRK1                                                                                                                               | VRK1                 | 1,026325242 | 1853800000  |
| Caspase recruitment domain-containing protein 9                                                                                                                    | CARD9                | 1,02628311  | 234590000   |
| DENN domain-containing protein 4C                                                                                                                                  | DENND4C              | 1,026156735 | 252500000   |
| Integrator complex subunit 7                                                                                                                                       | INTS7                | 1,026114617 | 495000000   |
| Alpha-actinin-4                                                                                                                                                    | ACTN4                | 1,026061974 | 8009900000  |
| Survival motor neuron protein                                                                                                                                      | SMN1;SMN2            | 1,026040919 | 300620000   |
| Phospholipid-transporting ATPase IG                                                                                                                                | ATP11C               | 1,025946179 | 31099000    |
| Pyruvate kinase PKM;Pyruvate kinase                                                                                                                                | PKM;PKM2             | 1,025809364 | 218090000   |
| DNA ligase;DNA ligase 1                                                                                                                                            | LIG1                 | 1,025767274 | 3743000000  |
| S-phase kinase-associated protein 1                                                                                                                                | SKP1                 | 1,025651545 | 4548500000  |
| Transmembrane protein 68                                                                                                                                           | TMEM68               | 1,025577913 | 339160000   |
| Ubiquitin conjugation factor E4 B                                                                                                                                  | UBE4B                | 1,025462227 | 2700700000  |
| 60S ribosomal protein L37a                                                                                                                                         | RPL37A               | 1,025104817 | 12602000000 |
| Splicing factor 3B subunit 5                                                                                                                                       | SF3B5                | 1,024947215 | 1340800000  |
| Regulator complex protein LAMTOR1                                                                                                                                  | LAMTOR1              | 1,024810666 | 1653900000  |
| 60S ribosomal protein L28                                                                                                                                          | RPL28                | 1,024695153 | 25066000000 |
| 26S protease regulatory subunit 8                                                                                                                                  | PSMC5                | 1,024527181 | 24232000000 |
| Malectin                                                                                                                                                           | MLEC                 | 1,024485196 | 8401600000  |
| U3 small nucleolar ribonucleoprotein protein IMP3                                                                                                                  | IMP3                 | 1,024443215 | 89066000    |
| Hsp70-binding protein 1                                                                                                                                            | HSPBP1               | 1,024443215 | 5657100000  |
| Microtubule-actin cross-linking factor 1, isoforms 1/2/3/5                                                                                                         | MACF1                | 1,024443215 | 1165900000  |
| Clathrin light chain B                                                                                                                                             | CLTB                 | 1,024443215 | 1413400000  |
| Mediator of RNA polymerase II transcription subunit 27                                                                                                             | MED27                | 1,024390744 | 243380000   |
| Eukaryotic translation initiation factor 3 subunit D                                                                                                               | EIF3D                | 1,02434877  | 10670000000 |
| Dynactin subunit 2                                                                                                                                                 | DCTN2                | 1,024201891 | 5726900000  |
| Serine/threonine-protein phosphatase;Serine/threonine-protein phosphatase 5                                                                                        | PPP5C                | 1,024170422 | 1100500000  |
| Developmentally-regulated GTP-binding protein 1                                                                                                                    | DRG1                 | 1,023929226 | 16602000000 |
| Ribosome-releasing factor 2, mitochondrial                                                                                                                         | GFM2                 | 1,023855841 | 87421000    |
| Charged multivesicular body protein 3                                                                                                                              | CHMP3                | 1,023730063 | 1567700000  |
| Structural maintenance of chromosomes protein 1A                                                                                                                   | SMC1A;DKFZp686L19178 | 1,023646228 | 23115000000 |
| Leucine-rich repeat serine/threonine-protein kinase 1                                                                                                              | LRRK1                | 1,023583361 | 80831000    |
|                                                                                                                                                                    |                      | 1,023562407 | 227430000   |
| PC1 domain-containing protein 2                                                                                                                                    | PCID2                | 1,023541453 | 904410000   |
| Bleomycin hydrolase                                                                                                                                                | BLMH                 | 1,023530977 | 3064300000  |
| UPF0690 protein C1orf52                                                                                                                                            | C1orf52              | 1,023510025 | 173490000   |
| UBX domain-containing protein 1                                                                                                                                    | UBXN1                | 1,023290082 | 2769100000  |
| cAMP-dependent protein kinase type II-alpha regulatory subunit                                                                                                     | PRKAR2A              | 1,023059767 | 323410000   |
| Heat shock protein HSP 90-beta                                                                                                                                     | HSP90AB1             | 1,023049301 | 5,2735E+11  |
| 60S ribosomal protein L34                                                                                                                                          | RPL34                | 1,023017903 | 14749000000 |
| tRNA (adenine(58)-N(1))-methyltransferase non-catalytic subunit TRM6                                                                                               | TRMT6                | 1,02285048  | 647750000   |
| U6 snRNA-associated Sm-like protein LSm2                                                                                                                           | LSM2                 | 1,022756328 | 27820000000 |
| 40S ribosomal protein S10;Putative 40S ribosomal protein S10-like                                                                                                  | RPS10;RPS10P5        | 1,022672653 | 10041000000 |
| Negative elongation factor B                                                                                                                                       | NELFB                | 1,022672653 | 907640000   |
| Serine/threonine-protein kinase TBK1                                                                                                                               | TBK1                 | 1,022317184 | 234810000   |
| 14-3-3 protein sigma                                                                                                                                               | SFN                  | 1,022296282 | 29886000000 |
| Phosphoglycolate phosphatase                                                                                                                                       | PGP                  | 1,02224403  | 1517500000  |
| Dynactin subunit 5                                                                                                                                                 | DCTN5                | 1,022212682 | 527760000   |
| Catenin alpha-3                                                                                                                                                    | CTNNA3               | 1,022003741 | 616520000   |
| Eukaryotic translation initiation factor 3 subunit K                                                                                                               | EIF3K                | 1,021909745 | 13170000000 |
| Dihydrofolate reductase, mitochondrial                                                                                                                             | DHFR1L1              | 1,021878417 | 1420800000  |
| Peroxisome oxidin-4                                                                                                                                                | PRDX4                | 1,021742684 | 19670000000 |
| Eukaryotic translation initiation factor 2 subunit 3;Putative eukaryotic translation initiation factor 2 subunit 3-like protein                                    | EIF2S3;EIF2S3L       | 1,021690489 | 20127000000 |
| UDP-N-acetylhexosamine pyrophosphorylase;UDP-N-acetylglucosamine pyrophosphorylase;UDP-N-acetylglucosamine 6-phosphate 4-epimerase                                 | UAE1                 | 1,021533933 | 734180000   |
| Zinc finger protein 830                                                                                                                                            | ZNF830               | 1,021460893 | 18404000    |
| RNA-binding protein EWS                                                                                                                                            | EWSR1                | 1,021293979 | 45543000000 |
| Basic leucine zipper and W2 domain-containing protein 2                                                                                                            | BZW2                 | 1,02109584  | 11668000000 |
| Immediate early response 3-interacting protein 1                                                                                                                   | IER3IP1              | 1,021085414 | 18469000000 |
| ER membrane protein complex subunit 4                                                                                                                              | EMC4                 | 1,021054136 | 10951000000 |
| Iron-responsive element-binding protein 2                                                                                                                          | IREB2                | 1,020887355 | 35320000000 |
| Mitochondrial fission 1 protein                                                                                                                                    | FIS1                 | 1,020845669 | 21533000000 |
| Serine/threonine-protein kinase 10                                                                                                                                 | STK10                | 1,020772725 | 805690000   |
| Dynamin-2                                                                                                                                                          | DNM2                 | 1,02059562  | 9395800     |
| Uncharacterized protein C19orf18                                                                                                                                   | C19orf18             | 1,020574788 | 208080000   |
| Nuclear protein localization protein 4 homolog                                                                                                                     | NPLOC4               | 1,020574788 | 1286100000  |
| Sphingosine-1-phosphate lyase 1                                                                                                                                    | SGPL1                | 1,020553957 | 54945000    |
| RalBP1-associated Eps domain-containing protein 1                                                                                                                  | REPS1                | 1,020449814 | 489940000   |
| Importin-9                                                                                                                                                         | IPO9                 | 1,020387339 | 61036000000 |
|                                                                                                                                                                    | MDN1                 | 1,020356104 | 124420000   |
| Histone H2A type 2-C;Histone H2A type 2-A                                                                                                                          | HIST2H2AC;HIST2H2AA3 | 1,020252002 | 678250000   |
| Protein argonaute-2;Protein argonaute                                                                                                                              | AGO2;EIF2C2          | 1,020220776 | 13458000000 |
| Caspase-3;Caspase-3 subunit p17;Caspase-3 subunit p12                                                                                                              | CASP3                | 1,020220776 | 69756000000 |
| Protein EVI2B                                                                                                                                                      | EVI2B                | 1,020168736 | 191630000   |
| Cytochrome b-c1 complex subunit 10                                                                                                                                 | UQCRC11              | 1,020106295 | 269280000   |
| ARF GTPase-activating protein GIT1                                                                                                                                 | GIT1                 | 1,020023053 | 444270000   |
| Serine/threonine-protein phosphatase 6 catalytic subunit;Serine/threonine-protein phosphatase 6 catalytic subunit, N-terminal                                      | PPP6C                | 1,019950226 | 63626000000 |
| 26S protease regulatory subunit 7                                                                                                                                  | PSMC7                | 1,019929421 | 28341000000 |
| Aspartate--tRNA ligase, cytoplasmic                                                                                                                                | DARS                 | 1,019835806 | 24289000000 |
| Solute carrier family 2, facilitated glucose transporter member 14;Solute carrier family 2, facilitated glucose transporter member 14                              | SLC2A14;SLC2A3       | 1,019783007 | 40049000000 |
| 7SK snRNA methylphosphate capping enzyme                                                                                                                           | MEPCE                | 1,019742209 | 78855000    |
| Pyruvate-5-carboxylate reductase;Pyruvate-5-carboxylate reductase 3                                                                                                | PYCR1                | 1,019669423 | 1922700000  |
| RWD domain-containing protein 4                                                                                                                                    | RWDD4                | 1,019627836 | 424650000   |
| Probable ATP-dependent RNA helicase DHX40                                                                                                                          | DHX40                | 1,019357601 | 82141000    |
| V-type proton ATPase subunit d 2                                                                                                                                   | ATP6V0D2             | 1,019316039 | 374910000   |
| 3-hydroxyisobutyryl-CoA hydrolase, mitochondrial                                                                                                                   | HIBCH                | 1,019305649 | 12418000000 |
| Methylome subunit p1Cln                                                                                                                                            | CLNS1A               | 1,019170599 | 15399000000 |
| DnaJ homolog subfamily B member 4                                                                                                                                  | DNAJB4               | 1,019139439 | 172440000   |
| Peroxisomal membrane protein PEX13                                                                                                                                 | PEX13                | 1,019118666 | 39528000    |
| Thioredoxin-interacting protein                                                                                                                                    | TXNIP                | 1,019097895 | 1203600000  |
| Nuclear pore complex protein Nup88                                                                                                                                 | NUP88                | 1,019087509 | 990840000   |
| Formin-like protein 1                                                                                                                                              | FMNL1                | 1,019045969 | 33688000000 |
| E3 ubiquitin-protein ligase UBR4                                                                                                                                   | UBR4                 | 1,019014816 | 22376000000 |
| Adenosylhomocysteinase;Putative adenosylhomocysteinase 2                                                                                                           | AHCYL1               | 1,0189629   | 1785400000  |
| TOX high mobility group box family member 4;Thymocyte selection-associated high mobility group box protein TOX;TOX high mobility group box protein 4;Bbx1;TOX;TOX3 | TOX4;Bbx1;TOX;TOX3   | 1,018900806 | 122320000   |
| Polycomb group RING finger protein 6                                                                                                                               | PCGF6                | 1,018838321 | 31215000    |
| Polyadenylate-binding protein 4                                                                                                                                    | PABPC4               | 1,018786422 | 41276000000 |
| Serine/threonine-protein phosphatase 6 regulatory subunit 3                                                                                                        | PPP6R3               | 1,018620381 | 78609000000 |
| Protein FRG1;Protein FRG1B                                                                                                                                         | FRG1;FRG1B           | 1,018589254 | 15743000000 |
| Pre-mRNA-splicing factor 38A                                                                                                                                       | PRPF38A              | 1,018392162 | 422680000   |
| U4/U6 small nuclear ribonucleoprotein Prp31                                                                                                                        | PRPF31               | 1,018340309 | 1819100000  |
| ADP-ribosylation factor-like protein 6                                                                                                                             | ARL6                 | 1,01829883  | 206690000   |
| Ubiquitin-like modifier-activating enzyme ATG7                                                                                                                     | ATG7                 | 1,018008572 | 825260000   |
| High mobility group protein B1;Putative high mobility group protein B1-like 1                                                                                      | HMGB1;HMGB1P1        | 1,017925671 | 89320000000 |
| Probable ATP-dependent RNA helicase DDX46                                                                                                                          | DDX46                | 1,017925671 | 14165000000 |
| Ras-related protein Rap-2a                                                                                                                                         | RAP2A                | 1,017915309 | 257200000   |
| Vacuolar protein sorting-associated protein 33A                                                                                                                    | VPS33A               | 1,017842784 | 261380000   |
| Plectin                                                                                                                                                            | PLEC                 | 1,017770269 | 26177000000 |
| Endophilin-B2                                                                                                                                                      | SH3GLB2              | 1,017708121 | 290190000   |
| Ubiquitin-fold modifier-conjugating enzyme 1                                                                                                                       | UFC1                 | 1,017687407 | 4559200000  |

|                                                                                                              |                      |             |             |
|--------------------------------------------------------------------------------------------------------------|----------------------|-------------|-------------|
| ATP-dependent RNA helicase DDX42                                                                             | DDX42                | 1,017604559 | 4882900000  |
| Insulin-degrading enzyme                                                                                     | IDE                  | 1,017594204 | 16001000000 |
| Heat shock protein HSP 90-alpha                                                                              | EL52;HSP90AA1        | 1,017594204 | 2,0717E+11  |
| Dehydrogenase/reductase SDR family member 2, mitochondrial                                                   | DHRS2                | 1,01756314  | 40563000    |
| COP9 signalosome complex subunit 3                                                                           | COP53                | 1,017552786 | 6612300000  |
| Coiled-coil domain-containing protein 144A;Putative coiled-coil domain-containing protein 144C               | CCDC144A;CCDC144CP   | 1,017532078 | 394180000   |
| Glutamine-rich protein 1                                                                                     | QRICH1               | 1,017521724 | 85562000    |
| 14-3-3 protein gamma;14-3-3 protein gamma, N-terminally processed                                            | YWHAG                | 1,017469959 | 78448000000 |
| Erlin-2                                                                                                      | ERLIN2               | 1,017428551 | 6612500000  |
| Serine/threonine-protein phosphatase PP1-alpha catalytic subunit;Serine/threonine-protein phosphatase        | PPP1CA               | 1,017397497 | 37079000000 |
| Cullin-associated NEDD8-dissociated protein 1                                                                | CAND1                | 1,017397497 | 43948000000 |
| 14-3-3 protein zeta/delta                                                                                    | YWHAZ                | 1,017397497 | 2,1501E+11  |
| DNA-dependent protein kinase catalytic subunit                                                               | PRKDC                | 1,017376796 | 926370000   |
| Probable cytosolic iron-sulfur protein assembly protein CIAO1                                                | CIAO1                | 1,017335395 | 966640000   |
| Rho guanine nucleotide exchange factor 7                                                                     | ARHGEF7;KIAA0142     | 1,017304347 | 1824000000  |
| Protein arginine N-methyltransferase 1                                                                       | PRMT1;HRMT1L2        | 1,017262952 | 40593000000 |
| GRIP1-associated protein 1                                                                                   | GRIPAP1              | 1,017252604 | 55637000    |
| ATP-dependent RNA helicase DDX39A                                                                            | DDX39A;DDX39         | 1,017221561 | 6769000000  |
| 26S proteasome non-ATPase regulatory subunit 11                                                              | PSMD11               | 1,017200867 | 36180000000 |
| Importin-4                                                                                                   | IPO4                 | 1,017097407 | 1297900000  |
| Anamorsin                                                                                                    | CIAPIN1              | 1,017014655 | 833410000   |
| DnaJ homolog subfamily C member 2;DnaJ homolog subfamily C member 2, N-terminally processed                  | DNAJC2               | 1,0169526   | 2156200000  |
| Alpha-centractin                                                                                             | ACTR1A               | 1,016869871 | 11465000000 |
| Chloride intracellular channel protein 4                                                                     | CLIC4                | 1,016756141 | 28409000000 |
| Putative RNA-binding protein Luc7-like 2                                                                     | LUC7L2               | 1,016714791 | 12650000000 |
| Small acidic protein                                                                                         | C11orf58;SMAP        | 1,016683781 | 461050000   |
| Catechol O-methyltransferase                                                                                 | COMT                 | 1,016683781 | 491670000   |
| General transcription factor IIH subunit 1                                                                   | GTF2H1               | 1,016570093 | 61429000    |
|                                                                                                              |                      | 1,016549425 | 58704000    |
| N-alpha-acetyltransferase 15, Naa15 auxiliary subunit                                                        | NAA15;NARG1          | 1,016549425 | 15314000000 |
| E3 ubiquitin-protein ligase CHIP                                                                             | STUB1                | 1,016549425 | 1482100000  |
| Phospholipase A-2-activating protein                                                                         | PLAA                 | 1,016549425 | 2876400000  |
| TATA box-binding protein-like protein 1                                                                      | TBPL1                | 1,016394442 | 1468700000  |
| UPF0668 protein C10orf76                                                                                     | C10orf76             | 1,016280819 | 124050000   |
| Calmodulin                                                                                                   | CALM1;CALM2;CALM3    | 1,016218853 | 15986000000 |
| Polypeptide N-acetylgalactosaminyltransferase 2;Polypeptide N-acetylgalactosaminyltransferase 2 soluble form | GALNT2               | 1,016177547 | 52301000    |
| Protein Simiate                                                                                              | FAM206A              | 1,01616722  | 144350000   |
| Geranylgeranyl transferase type-2 subunit alpha                                                              | RABGGTA              | 1,016115593 | 276990000   |
| Integrator complex subunit 10                                                                                | INTS10               | 1,016105269 | 289890000   |
| Secretory carrier-associated membrane protein 3                                                              | SCAMP3               | 1,016043324 | 800570000   |
| Vacuolar protein sorting-associated protein 4B                                                               | VPS4B                | 1,015960743 | 2522100000  |
| Deoxyhypusine synthase                                                                                       | DHPS                 | 1,015919458 | 562110000   |
| 60S ribosomal protein L36                                                                                    | RPL36                | 1,015878176 | 12014000000 |
| Kelch-like protein 9                                                                                         | KLHL9;DKFZp686L0695  | 1,015867856 | 26433000    |
| Integrator complex subunit 3                                                                                 | INTS3                | 1,015764668 | 1419200000  |
| Ubiquitin-conjugating enzyme E2 N                                                                            | UBE2N                | 1,0156615   | 23031000000 |
| 26S proteasome non-ATPase regulatory subunit 14                                                              | PSMD14               | 1,015651185 | 13937000000 |
| CCR4-NOT transcription complex subunit 3                                                                     | CNOT3                | 1,015558354 | 219750000   |
| Elongator complex protein 2                                                                                  | ELP2                 | 1,015413984 | 189030000   |
| Vesicular integral-membrane protein VIP36                                                                    | LMAN2                | 1,015341815 | 16153000000 |
| Etoposide-induced protein 2.4 homolog                                                                        | EI24                 | 1,015290271 | 82236000    |
| Vesicle transport protein GOT1B                                                                              | GOLT1B               | 1,015279963 | 2461700000  |
| Potassium-transporting ATPase alpha chain 2                                                                  | ATP12A               | 1,015269656 | 645710000   |
| Interferon-inducible double-stranded RNA-dependent protein kinase activator A                                | PRKRA                | 1,015259348 | 556590000   |
| Protein RER1                                                                                                 | RER1                 | 1,015238733 | 579150000   |
| ER membrane protein complex subunit 1                                                                        | EMC1                 | 1,015228426 | 5906400000  |
| Phosphofurin acidic cluster sorting protein 1                                                                | PACS1                | 1,01505324  | 1357400000  |
| Mitochondrial import receptor subunit TOM22 homolog                                                          | MST065;TOMM22        | 1,014929615 | 1261300000  |
| Protein FAM168A                                                                                              | FAM168A              | 1,014888413 | 155670000   |
| PDZ domain-containing protein GIPC2                                                                          | GIPC2                | 1,014641274 | 260110000   |
| Coiled-coil domain-containing protein 43                                                                     | CCDC43               | 1,014630979 | 1023500000  |
| Essential MCU regulator, mitochondrial                                                                       | SMDT1                | 1,01461039  | 60352000    |
| NEDD8-activating enzyme E1 regulatory subunit                                                                | NAE1                 | 1,014600095 | 1294600000  |
| Adipocyte plasma membrane-associated protein                                                                 | APMAP                | 1,014579508 | 1621200000  |
| Protein SMG9                                                                                                 | SMG9                 | 1,014507457 | 125490000   |
| OTU domain-containing protein 4                                                                              | OTUD4                | 1,014486873 | 693670000   |
| 40S ribosomal protein S9                                                                                     | RPS9                 | 1,014363386 | 1,1352E+11  |
| 60S ribosomal protein L32                                                                                    | RPL32                | 1,014342807 | 22097000000 |
| Ribulose-phosphate 3-epimerase                                                                               | RPE                  | 1,014250216 | 629850000   |
| Tumor protein p63-regulated gene 1-like protein                                                              | TPRG1L               | 1,014167926 | 300670000   |
| E3 ubiquitin-protein ligase HERC2                                                                            | HERC2                | 1,014126786 | 171920000   |
| Vigilin                                                                                                      | HDLBP                | 1,01408565  | 33189000000 |
| Ribosomal protein S6 kinase;Ribosomal protein S6 kinase alpha-4                                              | RPS6KA4              | 1,013951979 | 222560000   |
| 26S protease regulatory subunit 6A                                                                           | PSMC3                | 1,01384918  | 13488000000 |
| V-type proton ATPase subunit C 1                                                                             | ATP6V1C1             | 1,01378751  | 3872500000  |
| Costars family protein ABRACL                                                                                | ABRACL               | 1,013633369 | 1264200000  |
| Tyrosine-protein phosphatase non-receptor type;Tyrosine-protein phosphatase non-receptor type 1              | PTPN1                | 1,01361282  | 326190000   |
| Immunity-related GTPase family Q protein                                                                     | IRGQ                 | 1,013549097 | 23246000    |
| Activated RNA polymerase II transcriptional coactivator p15                                                  | PC4;SUB1             | 1,013530634 | 1754000000  |
| Condensin-2 complex subunit D3                                                                               | NCAPD3               | 1,013510089 | 193470000   |
| Diphosphoinositol polyphosphate phosphohydrolase 1                                                           | NUDT3                | 1,013469003 | 403310000   |
| Nuclear receptor corepressor 2                                                                               | NCOR2                | 1,01339711  | 147190000   |
| Eukaryotic translation initiation factor 3 subunit B                                                         | EIF3B;EIF3S9         | 1,013335495 | 21399000000 |
| Protein CutA                                                                                                 | CUTA                 | 1,013284155 | 1411160000  |
| 40S ribosomal protein S24                                                                                    | RPS24                | 1,013212288 | 23517000000 |
| Golgi apparatus protein 1                                                                                    | GLG1                 | 1,013150696 | 10053000000 |
| Methyltransferase-like protein 5                                                                             | METTL5               | 1,013089111 | 82878000    |
| Disks large homolog 1                                                                                        | DLG1                 | 1,013037796 | 853710000   |
| Intron-binding protein aquarius                                                                              | AQR                  | 1,012914662 | 2565000000  |
| Histone chaperone ASF1A                                                                                      | ASF1A                | 1,012791557 | 1182700000  |
| Desumoylating isopeptidase 1                                                                                 | DES1I                | 1,012688993 | 49846000    |
| Translation initiation factor eIF-2B subunit delta                                                           | EIF2B4;DKFZp586J0119 | 1,012606957 | 1705400000  |
| Acidic leucine-rich nuclear phosphoprotein 32 family member E                                                | ANP32E               | 1,012535186 | 15909000000 |
| 26S protease regulatory subunit 4                                                                            | PSMC1                | 1,012514681 | 9760100000  |
| Ras-related protein Rab-11B;Ras-related protein Rab-11A                                                      | RAB11B;RAB11A        | 1,012494178 | 34820000000 |
| Cyclin-dependent kinase 4                                                                                    | CDK4                 | 1,012381425 | 307520000   |
| Syntaxin-6                                                                                                   | STX6                 | 1,012371176 | 376150000   |
| 40S ribosomal protein S29                                                                                    | RPS29                | 1,012330182 | 756590000   |
| Mitochondrial fission factor                                                                                 | MFF                  | 1,012319934 | 317230000   |
| Tubulin beta-4B chain;Tubulin beta-4A chain                                                                  | TUBB2C;TUBB4B;TUBB4A | 1,012186728 | 1,7485E+11  |
| SWI/SNF-related matrix-associated actin-dependent regulator of chromatin subfamily D member 2                | SMARCD2              | 1,012176483 | 499740000   |
| Small glutamine-rich tetratricopeptide repeat-containing protein alpha                                       | SGTA                 | 1,012115017 | 1556900000  |
| GDP-fucose protein O-fucosyltransferase 2                                                                    | POFUT2               | 1,012104773 | 2768000000  |
| Centrosome-associated protein CEP250                                                                         | CEP250               | 1,012043315 | 400340000   |
| DNA polymerase beta                                                                                          | POLB                 | 1,012002348 | 510430000   |
| Pre-rRNA-processing protein TSR1 homolog                                                                     | TSR1                 | 1,012002348 | 1058600000  |
| COMM domain-containing protein 10                                                                            | COMMD10              | 1,011992106 | 404530000   |
| DNA polymerase;DNA polymerase alpha catalytic subunit                                                        | POLA1                | 1,011951143 | 1168600000  |

|                                                                                                                                   |                                   |             |              |
|-----------------------------------------------------------------------------------------------------------------------------------|-----------------------------------|-------------|--------------|
| 40S ribosomal protein S16                                                                                                         | RPS16                             | 1,011869226 | 64739000000  |
| Leucine-rich repeat-containing protein 59                                                                                         | LRRCS9                            | 1,011746375 | 17166000000  |
| Protein phosphatase 1 regulatory subunit 15A                                                                                      | PPP1R15A                          | 1,011613321 | 268710000    |
| Integrator complex subunit 8                                                                                                      | INTS8                             | 1,011613321 | 306610000    |
| Tripartite motif-containing protein 4                                                                                             | TRIM4                             | 1,011562155 | 11327000000  |
| Electron transfer flavoprotein-ubiquinone oxidoreductase, mitochondrial                                                           | ETFDH                             | 1,011541691 | 339500000    |
| Ras-related protein Rab-35                                                                                                        | RAB35                             | 1,011398461 | 2942500000   |
| EF-hand domain-containing protein D2                                                                                              | EFHD2                             | 1,011388231 | 11305000000  |
| Ethanolamine-phosphate cytidyltransferase                                                                                         | PCYT2                             | 1,011296178 | 718980000    |
| Arf-GAP with Rho-GAP domain, ANK repeat and PH domain-containing protein 1                                                        | ARAP1                             | 1,011275724 | 540670000    |
| Golgi reassembly-stacking protein 2                                                                                               | GORASP2                           | 1,011234819 | 517310000    |
| Myomegalin                                                                                                                        | PDE4DIP                           | 1,011193917 | 213930000    |
| Guanylate kinase                                                                                                                  | DKFZp666D023;GUK1                 | 1,011142794 | 11317000000  |
| Mitochondrial import receptor subunit TOM34                                                                                       | TOMM34                            | 1,011122346 | 13118000000  |
| UPF0696 protein C11orf68                                                                                                          | C11orf68                          | 1,010948573 | 18152000000  |
| Dehydrogenase/reductase SDR family member 7                                                                                       | DKFZp564H1664;DHRS7               | 1,010897475 | 724250000    |
| Glutaredoxin-3                                                                                                                    | GLRX3                             | 1,010825946 | 10630000000  |
| Small integral membrane protein 20                                                                                                | SMIM20                            | 1,010764643 | 396450000    |
| Cytosolic Fe-S cluster assembly factor NUBP2                                                                                      | NUBP2;NUBP1                       | 1,010723779 | 11393000000  |
| 40S ribosomal protein S19                                                                                                         | RPS19                             | 1,010662489 | 56949000000  |
| Rap1 GTPase-GDP dissociation stimulator 1                                                                                         | RAP1GDS1                          | 1,010642061 | 14353000000  |
| Mitogen-activated protein kinase;Mitogen-activated protein kinase 3                                                               | MAPK3;DKFZp686O0215               | 1,010631847 | 581060000    |
| Dihydropteridine reductase                                                                                                        | QDPR                              | 1,010560356 | 42183000000  |
| Serine/threonine-protein kinase 4;Serine/threonine-protein kinase 4 37kDa subunit;Serine/threonine-protein kinase 4 18kDa subunit | STK4;DKFZp686A2068                | 1,010519508 | 896320000    |
| 3(2),5-bisphosphate nucleotidase 1                                                                                                | BPNT1                             | 1,010488875 | 826810000    |
| Serine/threonine-protein phosphatase 1 regulatory subunit 10                                                                      | PPP1R10                           | 1,010448033 | 354750000    |
|                                                                                                                                   |                                   | 1,010315319 | 295820000    |
| 60S ribosomal protein L3                                                                                                          | RPL3;rpL3                         | 1,010254079 | 50026000000  |
| SAM and SH3 domain-containing protein 3                                                                                           | SASH3                             | 1,010049997 | 530880000    |
| Protein FAM60A                                                                                                                    | FAM60A                            | 1,009988789 | 376800000    |
| C-terminal-binding protein 1                                                                                                      | CTBP1                             | 1,009937788 | 63057000000  |
| SUMO-activating enzyme subunit 2                                                                                                  | UBA2                              | 1,009896991 | 10677000000  |
| Alcohol dehydrogenase class 4 mu/sigma chain                                                                                      | ADH7                              | 1,009784815 | 35484000000  |
| Nuclear pore complex protein Nup133                                                                                               | NUP133                            | 1,009764422 | 405250000    |
| 2,5-phosphodiesterase 12                                                                                                          | PDE12                             | 1,009733834 | 193740000    |
| ER lumen protein-retaining receptor 1;ER lumen protein-retaining receptor                                                         | KDELR1                            | 1,009713443 | 10430000000  |
| Tyrosine-protein kinase JAK1                                                                                                      | JAK1                              | 1,009703248 | 539120000    |
| Protein FAM49B                                                                                                                    | FAM49B;DKFZp686B04128             | 1,009652276 | 19012000000  |
| Syntenin-1                                                                                                                        | SDCBP                             | 1,009580923 | 27161000000  |
| von Willebrand factor A domain-containing protein 9                                                                               | VWA9                              | 1,009570731 | 171960000    |
| tRNA (cytosine(34)-C(5))-methyltransferase                                                                                        | NSUN2                             | 1,009448437 | 11644000000  |
| Serine/threonine-protein kinase N1                                                                                                | PKN1                              | 1,009295613 | 16524000000  |
| T-complex protein 1 subunit gamma                                                                                                 | CCT3                              | 1,00922431  | 79168000000  |
| Protein pelota homolog                                                                                                            | PELO                              | 1,009000283 | 485300000    |
| Coiled-coil domain-containing protein 6                                                                                           | CCDC6                             | 1,008857771 | 887970000    |
| Synembryon-A                                                                                                                      | RIC8A                             | 1,008827238 | 986110000    |
| Protein SEC13 homolog                                                                                                             | SEC13                             | 1,008796707 | 39943000000  |
| Chromodomain-helicase-DNA-binding protein 1                                                                                       | CHD1                              | 1,008664427 | 131500000    |
| Cell division control protein 42 homolog                                                                                          | CDC42                             | 1,008583042 | 30398000000  |
| Calcium uniporter protein, mitochondrial                                                                                          | MCU                               | 1,008471158 | 27472000000  |
| Dihydrofolate reductase                                                                                                           | DYR;DHFR                          | 1,008389803 | 25349000000  |
| Ubiquitin-40S ribosomal protein S27a;Ubiquitin;40S ribosomal protein S27a;Polyubiquitin-B;Ubiquitin;Polyubiquitin-C;Ubiquitin     | RPS27A;HEL112;UBB;UBC;Ub;C;Df     | 1,008328796 | 11545000000  |
| Stathmin                                                                                                                          | STMN1                             | 1,008277962 | 104110000000 |
| Putative 60S ribosomal protein L39-like 5;60S ribosomal protein L39                                                               | RPL39P5;RPL39                     | 1,00825763  | 25011000000  |
| Kanadaplin                                                                                                                        | SLC4A1AP                          | 1,008064516 | 328200000    |
| Alcohol dehydrogenase [NADP(+)]                                                                                                   | AKR1A1                            | 1,008054354 | 88625000000  |
| Protein bicaudal D homolog 2                                                                                                      | BICD2                             | 1,007973067 | 220940000    |
| Cap-specific mRNA (nucleoside-2-O-)-methyltransferase 1                                                                           | CMTR1                             | 1,007942588 | 484840000    |
| Spectrin alpha chain, non-erythrocytic 1                                                                                          | SPTAN1                            | 1,00791211  | 601600000    |
| Transmembrane protein 263                                                                                                         | TMEM263                           | 1,007810532 | 20047000000  |
| Biogenesis of lysosome-related organelles complex 1 subunit 2                                                                     | BLOC1S2                           | 1,007637895 | 671300000    |
| Puromycin-sensitive aminopeptidase                                                                                                | NPEPPS                            | 1,007576979 | 55393000000  |
| Phosphoglucomutase-2                                                                                                              | PGM2                              | 1,007556675 | 29154000000  |
| Periodic tryptophan protein 1 homolog                                                                                             | PWP1                              | 1,007414571 | 104010000    |
| Cell division cycle protein 16 homolog                                                                                            | CDC16                             | 1,007373978 | 388640000    |
| Trafficking protein particle complex subunit 6B                                                                                   | TRAPP6B                           | 1,007252216 | 612160000    |
| Heterogeneous nuclear ribonucleoprotein F;Heterogeneous nuclear ribonucleoprotein F, N-terminally processed                       | HNRNPF                            | 1,007160914 | 22852000000  |
| Serine/threonine-protein phosphatase PP1-gamma catalytic subunit;Serine/threonine-protein phosphatase                             | PPP1CC                            | 1,007120341 | 13914000000  |
| Poly(A) RNA polymerase, mitochondrial                                                                                             | MTPAP;GOLGA2;DKFZp686K0319        | 1,007029063 | 953040000    |
| Surfeit locus protein 4                                                                                                           | SURF4                             | 1,007029063 | 10250000000  |
| Charged multivesicular body protein 6                                                                                             | CHMP6                             | 1,006907385 | 153970000    |
| Bridging integrator 2                                                                                                             | BIN2                              | 1,006816145 | 21356000000  |
| Cytosolic acyl coenzyme A thioester hydrolase                                                                                     | ACOT7                             | 1,006653983 | 12330000000  |
| Ribosomal protein S6 kinase;Ribosomal protein S6 kinase alpha-1                                                                   | RPS6KA1                           | 1,006623583 | 482800000    |
| Serine/threonine-protein phosphatase 6 regulatory ankyrin repeat subunit B                                                        | ANKRD44;LOC91526                  | 1,006502003 | 815140000    |
| Transketolase                                                                                                                     | TKT                               | 1,006420966 | 49919000000  |
| Upstream-binding protein 1                                                                                                        | UBP1                              | 1,006339942 | 149150000    |
| Down syndrome critical region protein 3                                                                                           | DSCR3                             | 1,006329815 | 146130000    |
| Dynein light chain 1, cytoplasmic;Dynein light chain 2, cytoplasmic                                                               | DNCL1;DYNLL1;DYNLL2               | 1,006329815 | 45898000000  |
| Probable ATP-dependent RNA helicase DDX20                                                                                         | DDX20                             | 1,006299434 | 600800000    |
| Serine/threonine-protein kinase TAO3                                                                                              | TAOK3                             | 1,006015976 | 17778000000  |
| Nuclear autoantigenic sperm protein                                                                                               | NASP                              | 1,005894542 | 58994000000  |
| Alpha-actinin-3                                                                                                                   | ACTN3                             | 1,005854071 | 13874000000  |
| Signal transducer and activator of transcription;Signal transducer and activator of transcription 6                               | STAT6                             | 1,005823719 | 240740000    |
| Zinc finger CCCH domain-containing protein 11A                                                                                    | ZC3H11A                           | 1,005732676 | 326380000    |
| CAP-Gly domain-containing linker protein 1                                                                                        | CLIP1                             | 1,005520306 | 20236000000  |
| RING finger protein 219                                                                                                           | RNF219                            | 1,005439427 | 197130000    |
| Eukaryotic translation initiation factor 6                                                                                        | EIF6                              | 1,00529792  | 11831000000  |
| U5 small nuclear ribonucleoprotein 200 kDa helicase                                                                               | SNRNP200                          | 1,005247391 | 29977000000  |
| 26S proteasome non-ATPase regulatory subunit 8                                                                                    | PSMD8                             | 1,005004925 | 77537000000  |
| Coiled-coil domain-containing protein 25                                                                                          | CCDC25                            | 1,004833248 | 24272000000  |
| Putative heat shock protein HSP 90-beta 4                                                                                         | HSP90AB4P                         | 1,004823151 | 18217000000  |
| Signal transducer and activator of transcription 3;Signal transducer and activator of transcription                               | STAT3                             | 1,004762575 | 27539000000  |
| Docking protein 3                                                                                                                 | DOK3                              | 1,004762575 | 799450000    |
| Proteasome subunit beta type;Proteasome subunit beta type-6                                                                       | PSMB6                             | 1,004459802 | 82974000000  |
| Bifunctional lysine-specific demethylase and histidyl-hydroxylase MINA                                                            | MINA                              | 1,004369005 | 1242000000   |
| BRISC and BRCA1-A complex member 1                                                                                                | BABAM1                            | 1,00431857  | 958130000    |
| pre-mRNA 3' end processing protein WDR33                                                                                          | WDR33                             | 1,004288311 | 11331000000  |
| 60S ribosomal protein L18a                                                                                                        | RPL18A                            | 1,004278225 | 33750000000  |
| Phosphatidylinositol 5-phosphate 4-kinase type-2 beta                                                                             | PIP4K2B                           | 1,004046307 | 479410000    |
| Trafficking protein particle complex subunit 8                                                                                    | TRAPP8;KIAA1012                   | 1,004046307 | 515800000    |
| Ubiquitin-60S ribosomal protein L40;Ubiquitin;60S ribosomal protein L40                                                           | UBA52                             | 1,004005984 | 1.5938E+11   |
| Cilia- and flagella-associated protein 20                                                                                         | CFAP20                            | 1,003935427 | 18788000000  |
| Programmed cell death protein 10                                                                                                  | PDCD10                            | 1,003602935 | 95678000000  |
| NEDD4-binding protein 1                                                                                                           | NBP1                              | 1,003562647 | 845260000    |
| 40S ribosomal protein S11                                                                                                         | RPS11                             | 1,003532434 | 72443000000  |
| Serine/threonine-protein kinase MST4                                                                                              | RBMB;MST4                         | 1,003482083 | 31573000000  |
| 3-phosphoinositide-dependent protein kinase 1;Putative 3-phosphoinositide-dependent protein kinase 2                              | PDPK1;Pkb-like 2;Pkb-like 1;PDPK2 | 1,003381395 | 204580000    |

|                                                                                                                          |                     |             |             |
|--------------------------------------------------------------------------------------------------------------------------|---------------------|-------------|-------------|
| Cleavage and polyadenylation specificity factor subunit 5                                                                | NUDT21              | 1,003351193 | 15811000000 |
| Ubiquitin carboxyl-terminal hydrolase 24                                                                                 | USP24               | 1,003300086 | 22842000000 |
| Cell differentiation protein RCD1 homolog                                                                                | RQCD1               | 1,003200209 | 23182000000 |
| Caseinolytic peptidase B protein homolog                                                                                 | CLPB                | 1,003039209 | 20391000000 |
| Rho GTPase-activating protein 30                                                                                         | ARHGAP30            | 1,003029148 | 64289000000 |
| Epidermal growth factor receptor substrate 15                                                                            | EPS15               | 1,002978847 | 15387000000 |
| Glutamate--cysteine ligase catalytic subunit                                                                             | GCLC                | 1,002968788 | 50916000000 |
| Trafficking protein particle complex subunit 11                                                                          | TRAPP11             | 1,002918493 | 61252000000 |
| Transitional endoplasmic reticulum ATPase                                                                                | VCP;DKFZp434K0126   | 1,002908434 | 1,0938E+11  |
| 4F2 cell-surface antigen heavy chain                                                                                     | SLC3A2              | 1,002908434 | 29237000000 |
| Cleavage stimulation factor subunit 3                                                                                    | CSTF3               | 1,002827975 | 13875000000 |
| Ubiquitin-protein ligase E3C                                                                                             | UBE3C               | 1,002546468 | 15792000000 |
| Calcineurin subunit B type 1                                                                                             | PPP3R1              | 1,002536417 | 20404000000 |
| Diphthamide biosynthesis protein 1                                                                                       | DPH1                | 1,002486166 | 21906000000 |
|                                                                                                                          | BCR/ABL fusion      | 1,002224939 | 57177000000 |
| 40S ribosomal protein S23                                                                                                | RPS23               | 1,002154632 | 44632000000 |
| Testis-expressed sequence 10 protein                                                                                     | TEX10               | 1,002134547 | 25372000000 |
| Integrator complex subunit 1                                                                                             | INTS1;DKFZP586J0619 | 1,002074294 | 11707000000 |
| N-alpha-acetyltransferase 25, NatB auxiliary subunit                                                                     | NAA25               | 1,002024089 | 16616000000 |
| Eukaryotic translation initiation factor 5A-1;Eukaryotic translation initiation factor 5A-1-like                         | EIF5A;EIF5AL1       | 1,001963849 | 1,0269E+11  |
| Mediator of RNA polymerase II transcription subunit 30                                                                   | MED30               | 1,001883541 | 26906000000 |
| Signal recognition particle 9 kDa protein                                                                                | SRP9;DKFZp564M2223  | 1,001833355 | 75552000000 |
| Phosphatidylinositol transfer protein beta isoform                                                                       | PITPNB              | 1,001803246 | 40083000000 |
| Alpha-mannosidase 2                                                                                                      | MAN2A1              | 1,001763103 | 58507000000 |
| Septin-2                                                                                                                 |                     | 1,001642694 | 22885000000 |
| Prefoldin subunit 2                                                                                                      | PFDN2               | 1,001532344 | 44349000000 |
| COMM domain-containing protein 2                                                                                         | COMMD2              | 1,001502253 | 14986000000 |
| Histidine--tRNA ligase, cytoplasmic                                                                                      | HARS;HRS            | 1,001472164 | 74857000000 |
| Tyrosine-protein phosphatase non-receptor type 7                                                                         | PTN7                | 1,001331771 | 16343000000 |
| Ubiquitin-conjugating enzyme E2 variant 2                                                                                | UBE2V2              | 1,001211466 | 11030000000 |
| Cytochrome c oxidase assembly factor 7                                                                                   | COA7                | 1,001191418 | 12115000000 |
| Squamous cell carcinoma antigen recognized by T-cells 3                                                                  | SART3               | 1,001171371 | 36650000000 |
| Protein FAM160B1;Protein FAM160B2                                                                                        | FAM160B1;FAM160B2   | 1,001091189 | 48445000000 |
| ERO1-like protein alpha                                                                                                  | ERO1L               | 1,001001001 | 10972000000 |
| Tubulin alpha-1C chain                                                                                                   | TUBA1C;KLK9         | 1,000950903 | 12302000000 |
| Conserved oligomeric Golgi complex subunit 1                                                                             | ADCK1;COG1          | 1,000840706 | 19288000000 |
| TELO2-interacting protein 1 homolog                                                                                      | KIAA0406;TT11       | 1,000720519 | 26794000000 |
| Peroxiredoxin-2                                                                                                          | PRDX2               | 1,000720519 | 39210000000 |
| 40S ribosomal protein S15a                                                                                               | hCG_1994130;RPS15A  | 1,000680463 | 38095000000 |
|                                                                                                                          |                     | 1,000600036 | 24204000000 |
| Protein phosphatase 1 regulatory subunit 12;Protein phosphatase 1 regulatory subunit 12A                                 | PPP1R12A            | 1,000380144 | 34728000000 |
| AP-1 complex subunit sigma-1A                                                                                            | AP1S1               | 1,000160026 | 81083000000 |
|                                                                                                                          | ACT                 | 0,999900001 | 14029000000 |
| Thioredoxin reductase 1, cytoplasmic                                                                                     | GML;TXNRD1          | 0,999900001 | 22073000000 |
| Eukaryotic translation initiation factor 3 subunit C;Eukaryotic translation initiation factor 3 subunit C-like protein   | EIF3C;EIF3CL        | 0,999700009 | 25296000000 |
| 60S ribosomal protein L22                                                                                                | RPL22               | 0,999700009 | 18401000000 |
| 26S proteasome non-ATPase regulatory subunit 6                                                                           | PSMD6               | 0,999700009 | 26420000000 |
| ATP-dependent Clp protease ATP-binding subunit clpX-like, mitochondrial                                                  | CLPX;DKFZp586J151   | 0,99950025  | 60097000000 |
| Rho GTPase-activating protein 31                                                                                         | ARHGAP31            | 0,99950025  | 16861000000 |
| Spermidine synthase                                                                                                      | SRM                 | 0,999400036 | 18468000000 |
| C-1-tetrahydrofolate synthase, cytoplasmic;Methylenetetrahydrofolate dehydrogenase;Methylenetetrahydrofolate cyclohydrol | MTHFD1              | 0,999300049 | 10319000000 |
| PAB-dependent poly(A)-specific ribonuclease subunit PAN3                                                                 | PAN3                | 0,999100809 | 34824000000 |
| THO complex subunit 2                                                                                                    | THOC2               | 0,999000999 | 26849000000 |
| Calponin-2                                                                                                               | CNN2                | 0,998901209 | 40646000000 |
| Ovarian cancer-associated gene 2 protein                                                                                 | OVCA2               | 0,998701688 | 69415000000 |
|                                                                                                                          | PSMA3               | 0,998701688 | 73547000000 |
| Neurolysin, mitochondrial                                                                                                | NLN                 | 0,998502247 | 11955000000 |
| COP9 signalosome complex subunit 6                                                                                       | COPS6               | 0,998502247 | 66588000000 |
| Ran-binding protein 10                                                                                                   | RANBP10             | 0,998502247 | 35442000000 |
| Zinc finger matrin-type protein 2                                                                                        | ZMAT2               | 0,998402556 | 11934000000 |
| Maestro heat-like repeat-containing protein family member 1                                                              | MROH1               | 0,998302885 | 28306000000 |
| Calnexin                                                                                                                 | CANX                | 0,998302885 | 19908000000 |
| Rab GDP dissociation inhibitor beta                                                                                      | GD12                | 0,998302885 | 50337000000 |
| Rab3 GTPase-activating protein catalytic subunit                                                                         | RAB3GAP1            | 0,998302885 | 10645000000 |
| Nucleolar transcription factor 1                                                                                         | UBTF                | 0,998203234 | 11853000000 |
| Mitogen-activated protein kinase 9;Mitogen-activated protein kinase 10                                                   | MAPK9;MAPK10        | 0,998103603 | 36650000000 |
| Coronin;Coronin-1C                                                                                                       | CORO1C              | 0,998103603 | 29440000000 |
| 40S ribosomal protein S15                                                                                                | RPS15               | 0,998003992 | 11775000000 |
| SWI/SNF complex subunit SMARCC2                                                                                          | SMARCC2             | 0,998003992 | 27642000000 |
| Protein PRRC1                                                                                                            | PRRC1               | 0,997904401 | 91004000000 |
| 40S ribosomal protein S18                                                                                                | RPS18               | 0,997904401 | 80983000000 |
| UDP-N-acetylhexosamine pyrophosphorylase-like protein 1                                                                  | UAP1L1              | 0,997904401 | 29102000000 |
| ER membrane protein complex subunit 2                                                                                    | EMC2                | 0,997804829 | 30734000000 |
| AP-2 complex subunit beta                                                                                                | AP2B1;DKFZp781K0743 | 0,997605746 | 17208000000 |
| T-complex protein 1 subunit alpha                                                                                        | TCP1                | 0,997506234 | 85647000000 |
| AP-2 complex subunit mu                                                                                                  | AP2M1               | 0,99730727  | 44765000000 |
| Liprin-beta-1                                                                                                            | PPF1BP1             | 0,99730727  | 29033000000 |
| E3 ubiquitin-protein ligase UBR2                                                                                         | UBR2                | 0,99730727  | 56700000000 |
| Tubulin alpha-1B chain                                                                                                   | TUBA1B              | 0,997207818 | 2,0919E+11  |
| Splicing factor, proline- and glutamine-rich                                                                             | SFPQ                | 0,997008973 | 33313000000 |
| Structural maintenance of chromosomes protein;Structural maintenance of chromosomes protein 2                            | SMC2                | 0,99690958  | 79131000000 |
| Peroxiredoxin-1                                                                                                          | PRDX1               | 0,996710854 | 70916000000 |
| DNA mismatch repair protein Msh2                                                                                         | MSH2                | 0,996611521 | 21157000000 |
| Acetyl-CoA carboxylase 2;Biotin carboxylase                                                                              | ACACB               | 0,996512207 | 28655000000 |
| Condensin complex subunit 1                                                                                              | NCAPD2              | 0,996512207 | 45834000000 |
| Thioredoxin-related transmembrane protein 4                                                                              | TMX4                | 0,996412914 | 48863000000 |
| Putative phospholipase B-like 2;Putative phospholipase B-like 2 32 kDa form;Putative phospholipase B-like 2 45 kDa form  | PLBD2               | 0,99631364  | 86043000000 |
| Bis(5-nucleosyl)-tetraphosphatase [asymmetrical]                                                                         | NUDT2               | 0,99631364  | 75691000000 |
| DNA polymerase delta subunit 2                                                                                           | POLD2               | 0,996115151 | 77744000000 |
|                                                                                                                          | ANKRD54             | 0,995916741 | 14742000000 |
|                                                                                                                          |                     | 0,995916741 | 23940000000 |
| Nuclear export mediator factor NEMF                                                                                      | NEMF                | 0,995817566 | 12323000000 |
| Acyl-coenzyme A thioesterase 9, mitochondrial                                                                            | ACOT9               | 0,995619275 | 60878000000 |
| Protocadherin Fat 3                                                                                                      | FAT3                | 0,995619275 | 22730000000 |
| Cyclin-dependent kinase 12                                                                                               | CDK12               | 0,995520159 | 30829000000 |
| Actin, alpha cardiac muscle 1;Actin, gamma-enteric smooth muscle;Actin, aortic smooth muscle                             | ACTC1;ACTA2;ACTG2   | 0,995520159 | 65740000000 |
| Ras-related protein Ral-B                                                                                                | RALB                | 0,995321987 | 40526000000 |
| Extended synaptotagmin-2                                                                                                 | ESYT2               | 0,995321987 | 13845000000 |
| General transcription factor IIE subunit 1                                                                               | GTF2E1              | 0,99522293  | 12574000000 |
| THO complex subunit 5 homolog                                                                                            | THOC5               | 0,995123893 | 29701000000 |
| Heterogeneous nuclear ribonucleoprotein L                                                                                | HNRNPL              | 0,995123893 | 21621000000 |
| Argininosuccinate lyase                                                                                                  | ASL                 | 0,994925878 | 27176000000 |
| U6 snRNA-associated Sm-like protein LSM4                                                                                 | LSM4                | 0,994925878 | 13090000000 |
| N-alpha-acetyltransferase 10                                                                                             | NAA10               | 0,994431185 | 41948000000 |
| Muskelin                                                                                                                 | MKLN1               | 0,994431185 | 74145000000 |
| Charged multivesicular body protein 1b                                                                                   | CHMP1B              | 0,994431185 | 10219000000 |
| Enoyl-CoA delta isomerase 2, mitochondrial                                                                               | ECI2;HCA64;PECI     | 0,994332306 | 13768000000 |
| TNF receptor-associated factor 6                                                                                         | TRAF6               | 0,994332306 | 10535000000 |

|                                                                                                                                           |                             |             |             |
|-------------------------------------------------------------------------------------------------------------------------------------------|-----------------------------|-------------|-------------|
| ER11 exoribonuclease 3                                                                                                                    | PRNPIP;ERI3                 | 0,994332306 | 170560000   |
| Pachytene checkpoint protein 2 homolog                                                                                                    | TRIP13                      | 0,994332306 | 289990000   |
| Proline-serine-threonine phosphatase-interacting protein 1                                                                                | PSTPIP1                     | 0,994332306 | 286850000   |
| Integrator complex subunit 5                                                                                                              | INTS5                       | 0,994233446 | 580680000   |
| Multifunctional methyltransferase subunit TRM112-like protein                                                                             | TRMT112                     | 0,994035785 | 136990000   |
| GMP reductase;GMP reductase 2                                                                                                             | GMPR2                       | 0,993936984 | 153410000   |
| Inosine triphosphate pyrophosphatase                                                                                                      | ITPA                        | 0,993739442 | 557470000   |
| 39S ribosomal protein L43, mitochondrial                                                                                                  | MRPL43                      | 0,9936407   | 122590000   |
| Putative deoxyribonuclease TATDN1                                                                                                         | TATDN1                      | 0,9936407   | 236430000   |
| EKC/KEOPS complex subunit TPRKB                                                                                                           | TPRKB                       | 0,993541977 | 243390000   |
| Centrosomal protein of 170 kDa                                                                                                            | CEP170                      | 0,993443274 | 247100000   |
| Heterogeneous nuclear ribonucleoprotein U                                                                                                 | HNRNPU;HNRPU                | 0,993443274 | 26935000000 |
| Choline/ethanolaminephosphotransferase 1                                                                                                  | CEPT1                       | 0,993245928 | 1002800000  |
| Glycine--tRNA ligase                                                                                                                      | GARS                        | 0,993245928 | 20022000000 |
| N-alpha-acetyltransferase 38, NatC auxiliary subunit                                                                                      | NAA38                       | 0,993245928 | 178650000   |
| O-phosphoserine-tRNA(Sec) selenium transferase                                                                                            | SEPSECS                     | 0,993147284 | 160590000   |
| AP-1 complex subunit beta-1                                                                                                               | AP1B1                       | 0,993048659 | 4226900000  |
| Fatty aldehyde dehydrogenase;Aldehyde dehydrogenase;Aldehyde dehydrogenase family 3 member B2;Aldehyde dehydrogenase                      | ALDH3A2;ALDH3B2;ALDH3A1;DKF | 0,992950055 | 318990000   |
| Proteasome assembly chaperone 4                                                                                                           | PSMG4                       | 0,992950055 | 196700000   |
| Neurobeachin-like protein 2                                                                                                               | NBEAL2                      | 0,992851469 | 2261900000  |
| SHC-transforming protein 1                                                                                                                | SHC1                        | 0,992752904 | 930380000   |
| Sodium/potassium-transporting ATPase subunit alpha-3                                                                                      | ATP1A3                      | 0,992654358 | 191070000   |
| CD2-associated protein                                                                                                                    | CD2AP                       | 0,992654358 | 286110000   |
| RNA polymerase-associated protein CTR9 homolog                                                                                            | CTR9                        | 0,992654358 | 656120000   |
| FACT complex subunit SPT16                                                                                                                | SUPT16H                     | 0,992555831 | 9392400000  |
| 26S proteasome non-ATPase regulatory subunit 2                                                                                            | PSMD2;DKFzp564A2282         | 0,992555831 | 27823000000 |
| Ubiquitin carboxyl-terminal hydrolase 34                                                                                                  | USP34                       | 0,992555831 | 1270700000  |
| Proline-rich AKT1 substrate 1                                                                                                             | AKT1S1                      | 0,992457324 | 591220000   |
| Ran-specific GTPase-activating protein                                                                                                    | RANBP1                      | 0,992388837 | 21266000000 |
| Endoplasmic reticulum aminopeptidase 1                                                                                                    | ERAP1                       | 0,992260369 | 384140000   |
| THO complex subunit 7 homolog                                                                                                             | THOC7                       | 0,992260369 | 869680000   |
| E3 ubiquitin-protein ligase HUWE1                                                                                                         | HUWE1                       | 0,992260369 | 21436000000 |
| Ras-related protein Rab-6B                                                                                                                | RAB6B                       | 0,992063492 | 1624400000  |
| Vacuolar protein sorting-associated protein 28 homolog                                                                                    | VPS28                       | 0,992063492 | 732410000   |
| ESF1 homolog                                                                                                                              | ESF1                        | 0,992063492 | 430860000   |
| Kaptein                                                                                                                                   | KPTN                        | 0,991965083 | 181760000   |
| RNA-binding protein with serine-rich domain 1                                                                                             | RNPS1                       | 0,991965083 | 811340000   |
| Heterogeneous nuclear ribonucleoprotein M                                                                                                 | HNRNPM;ORF                  | 0,991965083 | 18951000000 |
| Heterogeneous nuclear ribonucleoprotein H3                                                                                                | HNRNPH3                     | 0,991965083 | 136410000   |
| Titin                                                                                                                                     | TTN;DKFzP451N061            | 0,991866693 | 379510000   |
| 26S proteasome non-ATPase regulatory subunit 3                                                                                            | PSMD3                       | 0,991866693 | 10914000000 |
| Protein kinase C and casein kinase substrate in neurons protein 2                                                                         | PACSIN2                     | 0,991866693 | 1395300000  |
| SUMO-activating enzyme subunit 1;SUMO-activating enzyme subunit 1, N-terminally processed                                                 | SAE1                        | 0,991768323 | 14479000000 |
| Coatomer subunit gamma-2;Coatomer subunit gamma                                                                                           | COPG2                       | 0,991768323 | 2718600000  |
| Phosphatidylinositol 4-kinase type 2-alpha                                                                                                | PI4K2A                      | 0,991669972 | 174670000   |
| Negative elongation factor C/D                                                                                                            | TH1L;NELFCD                 | 0,991669972 | 374670000   |
| Alcohol dehydrogenase class-3                                                                                                             | ADH5                        | 0,991473329 | 10811000000 |
| COMM domain-containing protein 6                                                                                                          | COMM6                       | 0,991375037 | 415080000   |
| Protein-associating with the carboxyl-terminal domain of ezrin                                                                            | SCYL3                       | 0,991375037 | 155040000   |
| Transportin-3                                                                                                                             | TNPO3                       | 0,991178511 | 2319300000  |
| Dynactin subunit 3                                                                                                                        | DCTN3                       | 0,990982063 | 583680000   |
| COMM domain-containing protein 1                                                                                                          | C2orf5;COMM1                | 0,990883868 | 237930000   |
| ATP synthase subunit d, mitochondrial                                                                                                     | ATP5H                       | 0,990785693 | 899570000   |
| U4/U6.U5 tri-snRNP-associated protein 1                                                                                                   | SART1                       | 0,990785693 | 555470000   |
| Syntaxin-binding protein 2                                                                                                                | STXB2;ZNF14                 | 0,990785693 | 2877000000  |
| 26S proteasome non-ATPase regulatory subunit 13                                                                                           | PSMD13                      | 0,990687537 | 16300000000 |
| Translation initiation factor eIF-2B subunit gamma                                                                                        | EIF2B3                      | 0,990687537 | 771280000   |
| C2 domain-containing protein 5                                                                                                            | KIAA0528;C2CD5              | 0,990589401 | 585810000   |
| 26S proteasome non-ATPase regulatory subunit 4                                                                                            | HZGJ;WDR92                  | 0,990589401 | 1810200000  |
| Prefoldin subunit 4                                                                                                                       | PSMD4                       | 0,990589401 | 5924300000  |
| MKL/myocardin-like protein 2;Phosphatase and actin regulator                                                                              | PFND4                       | 0,990589401 | 953450000   |
| Ras-related GTP-binding protein C;Ras-related GTP-binding protein D                                                                       | MKL2                        | 0,990197049 | 800580000   |
| Activity-dependent neuroprotector homeobox protein                                                                                        | RRAGC;RRAGD                 | 0,98990299  | 2756300000  |
| Destrin                                                                                                                                   | ADNP                        | 0,98990299  | 190020000   |
| MAGUK p55 subfamily member 6                                                                                                              | DSTN                        | 0,989805008 | 8228600000  |
| T-complex protein 1 subunit epsilon                                                                                                       | MPP6                        | 0,989805008 | 799900000   |
| Nucleosome assembly protein 1-like 4                                                                                                      | CCT5                        | 0,989805008 | 551180000   |
| Elongator complex protein 3                                                                                                               | NAP1L4                      | 0,989805008 | 1294100000  |
| Serine/arginine-rich splicing factor 1                                                                                                    | ELP3                        | 0,989805008 | 746680000   |
| Mitotic spindle assembly checkpoint protein MAD1                                                                                          | SRSF1                       | 0,989805008 | 12374000000 |
| Phosphoribosyl pyrophosphate synthase-associated protein 1                                                                                | MAD1L1                      | 0,989609104 | 15625000000 |
| Alpha-(1,6)-fucosyltransferase                                                                                                            | PRPSAP1                     | 0,989609104 | 699540000   |
| NADH dehydrogenase [ubiquinone] 1 alpha subcomplex subunit 3                                                                              | FUT8                        | 0,989609104 | 4326300000  |
| Ezrin;Tyrosine-protein kinase receptor                                                                                                    | NDUFA3                      | 0,989511181 | 1453100000  |
| B-cell CLL/lymphoma 7 protein family member C;B-cell CLL/lymphoma 7 protein family member B;B-cell CLL/lymphoma 7 protein family member A | EZR;EZR-ROS1                | 0,989413278 | 208570000   |
| THUMP domain-containing protein 3                                                                                                         | BCL7C;BCL7B;BCL7A           | 0,989315394 | 3524200000  |
| Rho GDP-dissociation inhibitor 1                                                                                                          | THUMP3                      | 0,989315394 | 250690000   |
| Coiled-coil-helix-coiled-coil-helix domain-containing protein 5                                                                           | THUMP3                      | 0,989217529 | 169350000   |
| Joubertin                                                                                                                                 | ARHGDI                      | 0,989119683 | 62869000000 |
| 40S ribosomal protein S27;40S ribosomal protein S27-like                                                                                  | CHCHD5                      | 0,988924051 | 599030000   |
| WASH complex subunit FAM21C;WASH complex subunit FAM21A;WASH complex subunit FAM21B                                                       | AH1                         | 0,988826263 | 279880000   |
| Uridine-cytidine kinase 2                                                                                                                 | RPS27L                      | 0,988728495 | 3895400000  |
| Reticulocalbin-2                                                                                                                          | FAM21A;FAM21C;DKFzP434O171; | 0,988630746 | 257060000   |
| Golgin subfamily A member 4                                                                                                               | UCK2                        | 0,988533017 | 1539200000  |
| STE20-like serine/threonine-protein kinase                                                                                                | RCN2                        | 0,988533017 | 577570000   |
| Mediator of RNA polymerase II transcription subunit 12                                                                                    | GOLGA4                      | 0,988239945 | 709660000   |
| Non-POU domain-containing octamer-binding protein                                                                                         | SLK                         | 0,988239945 | 151890000   |
| Protein diaphanous homolog 3                                                                                                              | MED12;TNRC11                | 0,988239945 | 10813000000 |
| Proteasome subunit alpha type-5;Proteasome subunit alpha type                                                                             | NONO                        | 0,988239945 | 723820000   |
| Peptidyl-prolyl cis-trans isomerase;FK506-binding protein 15                                                                              | DIAPH3                      | 0,988142292 | 8339900000  |
| Cytoplasmic dynein 1 light intermediate chain 1                                                                                           | PSMA5                       | 0,988142292 | 840290000   |
| 116 kDa U5 small nuclear ribonucleoprotein component                                                                                      | FKBP15                      | 0,988142292 | 45065000000 |
| MORC family CW-type zinc finger protein 2                                                                                                 | DYNC1L1;DKFzP686A1525       | 0,988142292 | 1330800000  |
| EH domain-containing protein 1                                                                                                            | EFTUD2;U5-116KD;SNRP116     | 0,98804466  | 1888600000  |
| Hermansky-Pudlak syndrome 1 protein                                                                                                       | MORC2                       | 0,987947046 | 13965000000 |
| Thioredoxin domain-containing protein 12                                                                                                  | EHD1                        | 0,987947046 | 514080000   |
| Ragulator complex protein LAMTOR2                                                                                                         | HPS1                        | 0,987947046 | 3235500000  |
| Histone deacetylase 4                                                                                                                     | TXNDC12                     | 0,987751877 | 1724500000  |
| Syntaxin-4                                                                                                                                | LAMTOR2                     | 0,987654321 | 3046600000  |
| Anaphase-promoting complex subunit 1                                                                                                      | HDAC4;MGC16025              | 0,987654321 | 626330000   |
| Protein FAM114A2                                                                                                                          | STX4;STX4A                  | 0,987556785 | 274170000   |
| Tubulin beta-8 chain                                                                                                                      | ANAPC1                      | 0,987459267 | 780370000   |
| Proteasome assembly chaperone 1                                                                                                           | FAM114A2                    | 0,987459267 | 1074500000  |
| Ras suppressor protein 1                                                                                                                  | TUBB8                       | 0,987459267 | 543390000   |
| von Willebrand factor A domain-containing protein 5A                                                                                      | PSMG1                       | 0,987459267 | 2435900000  |
|                                                                                                                                           | RSU1                        | 0,987361769 | 1718200000  |
|                                                                                                                                           | VWA5A                       | 0,987361769 | 7570200000  |
|                                                                                                                                           |                             | 0,987264291 | 720630000   |

|                                                                                                                             |                                  |                            |                         |
|-----------------------------------------------------------------------------------------------------------------------------|----------------------------------|----------------------------|-------------------------|
| Glia maturation factor beta                                                                                                 | GMFB                             | 0,987264291                | 4730300000              |
| Clathrin heavy chain 1                                                                                                      | HCLS1<br>CLTC                    | 0,987166831<br>0,987166831 | 1830900000<br>2,028E+11 |
| Zinc finger protein 330                                                                                                     | ZNF330                           | 0,98697197                 | 3159000000              |
| ADP-ribosylation factor-like protein 1                                                                                      | ARL1                             | 0,986874568                | 6935900000              |
| Beta-centractin                                                                                                             | ACTR1B                           | 0,986777186                | 1638900000              |
| Ras-related protein Rab-5A                                                                                                  | RAB5A                            | 0,986777186                | 2453700000              |
| Activating signal cointegrator 1 complex subunit 2                                                                          | ASCC2                            | 0,986679822                | 183410000               |
| Voltage-gated potassium channel subunit beta-2                                                                              | KCNAB2                           | 0,986582478                | 2307600000              |
| Cocaine esterase                                                                                                            | CES2                             | 0,986485153                | 935140000               |
| Epididymis-specific alpha-mannosidase                                                                                       | MAN2B2                           | 0,986387848                | 212710000               |
| Cleavage stimulation factor subunit 1                                                                                       | CSTF1                            | 0,986290561                | 1798500000              |
| ADP-sugar pyrophosphatase                                                                                                   | NUDT5                            | 0,986290561                | 1297500000              |
| Acetoacetyl-CoA synthetase                                                                                                  | AACS                             | 0,986193294                | 722130000               |
| Macrophage erythroblast attacher                                                                                            | MAEA                             | 0,986096046                | 628540000               |
| Transportin-2                                                                                                               | TNPO2 variant protein;TNPO2      | 0,986096046                | 2400000000              |
| Peroxisomal membrane protein PEX16                                                                                          | PEX16                            | 0,985998817                | 1225600000              |
| Cohesin subunit SA-1                                                                                                        | STAG1 variant protein;STAG1;DKF; | 0,985998817                | 36854000                |
| Prostaglandin E synthase 3                                                                                                  | PTGES3                           | 0,985998817                | 24905000000             |
| SAFB-like transcription modulator                                                                                           | SLTM                             | 0,985804416                | 96099000                |
| Oxysterol-binding protein 1;Oxysterol-binding protein                                                                       | OSBP                             | 0,985707245                | 4827000000              |
| Mediator of RNA polymerase II transcription subunit 16                                                                      | MED16                            | 0,985512959                | 142370000               |
| Paired amphipathic helix protein Sin3a                                                                                      | SIN3A                            | 0,985512959                | 3214800000              |
| DNA mismatch repair protein Msh6                                                                                            | MSH6;GTBP                        | 0,985512959                | 5063200000              |
| DnaJ homolog subfamily B member 11                                                                                          | DNAJB11                          | 0,985415845                | 9865600000              |
| Ataxin-3                                                                                                                    | ATXN3                            | 0,985415845                | 365330000               |
| X-ray repair cross-complementing protein 6                                                                                  | XRCC6                            | 0,985415845                | 396930000               |
| Aminoacyl tRNA synthase complex-interacting multifunctional protein 2                                                       | AIMP2                            | 0,985415845                | 7751200000              |
| UDP-glucose 4-epimerase                                                                                                     | GALE                             | 0,985221675                | 340090000               |
| U1 small nuclear ribonucleoprotein A                                                                                        | SNRPA                            | 0,984833563                | 1486000000              |
| ADP-ribosylation factor-like protein 8A                                                                                     | ARL8A                            | 0,984833563                | 2085600000              |
| Ras GTPase-activating protein 1                                                                                             | RASA1                            | 0,984736583                | 1628600000              |
| Ubiquinone biosynthesis protein COQ4 homolog, mitochondrial                                                                 | COQ4                             | 0,98454268                 | 102300000               |
| Transforming acidic coiled-coil-containing protein 1                                                                        | TACC1;DKFZp686K18126             | 0,98454268                 | 121440000               |
| Emerin                                                                                                                      | EMD                              | 0,98454268                 | 426870000               |
| 26S proteasome non-ATPase regulatory subunit 1                                                                              | PSMD1                            | 0,984445757                | 23764000000             |
| COMM domain-containing protein 7                                                                                            | COMM7                            | 0,984348853                | 916790000               |
| Guanine nucleotide-binding protein-like 1                                                                                   | HSR1;GNL1                        | 0,984348853                | 443440000               |
| COP9 signalosome complex subunit 7b                                                                                         | COPS7B                           | 0,984058256                | 985230000               |
| Mitogen-activated protein kinase kinase kinase 7                                                                            | MAP3K7                           | 0,984058256                | 126960000               |
| AP-2 complex subunit alpha-2                                                                                                | AP2A2                            | 0,984058256                | 3588700000              |
| Formin-binding protein 1                                                                                                    | FBP1                             | 0,984058256                | 907150000               |
| Serum paraoxonase/lactonase 3                                                                                               | PON3                             | 0,984058256                | 547670000               |
| Programmed cell death protein 4                                                                                             | PDCD4                            | 0,983961429                | 693630000               |
| Methylmalonyl-CoA mutase, mitochondrial                                                                                     | MUT                              | 0,98386462                 | 347500000               |
| Translin                                                                                                                    | TSN                              | 0,983767831                | 18947000000             |
| Syntaxin-7                                                                                                                  | STX7                             | 0,983767831                | 1744300000              |
| Kinase suppressor of Ras 1                                                                                                  | KSR1                             | 0,98367106                 | 118100000               |
| Large neutral amino acids transporter small subunit 1                                                                       | SLC7A5;lat1                      | 0,98367106                 | 4021800000              |
| Pre-mRNA-processing-splicing factor 8                                                                                       | HSP90Bf                          | 0,98367106                 | 284300000               |
| Protein lin-7 homolog C;Protein lin-7 homolog A                                                                             | PRPF8                            | 0,983574309                | 22409000000             |
| RNA-binding protein 12                                                                                                      | LINTC;LINTA                      | 0,983574309                | 1513400000              |
| Structural maintenance of chromosomes protein;Structural maintenance of chromosomes protein 4                               | DKFZp667H197;RBM12               | 0,983574309                | 2425600000              |
| Vesicle-fusing ATPase                                                                                                       | SMC4                             | 0,983574309                | 8866300000              |
| Bcl-2-binding component 3                                                                                                   | NSF                              | 0,983574309                | 20471000000             |
| Supervillin                                                                                                                 | BBC3                             | 0,983477577                | 303020000               |
| DET1- and DDB1-associated protein 1                                                                                         | SVIL                             | 0,983380863                | 313470000               |
| p21-activated protein kinase-interacting protein 1                                                                          | DDA1                             | 0,983284169                | 704330000               |
| Serine/threonine-protein phosphatase 4 regulatory subunit 3B                                                                | PAK11P1                          | 0,983284169                | 329990000               |
| Phosphoribosylformylglycinamide synthase                                                                                    | SMEK2                            | 0,983098038                | 1342800000              |
| Arginine and glutamate-rich protein 1                                                                                       | PFAS                             | 0,9829942                  | 12573000000             |
| 4-trimethylaminobutylaldehyde dehydrogenase                                                                                 | ARGLU1                           | 0,982897582                | 1926100000              |
| COMM domain-containing protein 5                                                                                            | ALDH9A1                          | 0,982607841                | 3659500000              |
| SAGA-associated factor 29 homolog                                                                                           | COMM5                            | 0,982607841                | 825290000               |
| Stress-70 protein, mitochondrial                                                                                            | CCDC101                          | 0,982607841                | 694980000               |
| SUN domain-containing protein 2                                                                                             | HSPA9                            | 0,982318271                | 84515000000             |
| UPF0554 protein C2orf43                                                                                                     | SUN2;UNC84B                      | 0,981932443                | 299130000               |
| Histone acetyltransferase KAT7                                                                                              | C2orf43                          | 0,981932443                | 108920000               |
| Metastasis-associated protein MTA1                                                                                          | KAT7                             | 0,981932443                | 18480000                |
| Malonyl-CoA decarboxylase, mitochondrial                                                                                    | MTA1                             | 0,981739643                | 374440000               |
| Dystonin                                                                                                                    | MLYCD                            | 0,981643271                | 139520000               |
| A-kinase anchor protein 9                                                                                                   | DST                              | 0,981643271                | 142600000               |
| Protein transport protein Sec31A                                                                                            | AKAP9                            | 0,981450584                | 1908900000              |
| Tubulin beta-2B chain                                                                                                       | SEC31A                           | 0,981450584                | 4780800000              |
| Ubiquitin conjugation factor E4 A                                                                                           | TUBB2B;DKFZp566F223              | 0,981354269                | 1549900000              |
| Serine/threonine-protein kinase Nek9                                                                                        | UBE4A                            | 0,981257973                | 1563000000              |
| RNA-binding motif protein, X chromosome;RNA-binding motif protein, X chromosome, N-terminally processed;RNA binding protein | NEK9                             | 0,981257973                | 477660000               |
| Nuclear pore complex protein Nup160                                                                                         | NUP160                           | 0,981257973                | 3592200000              |
| 26S proteasome non-ATPase regulatory subunit 12                                                                             | PSMD12                           | 0,981065437                | 1567000000              |
| Dynein light chain Tctex-type 1                                                                                             | DYNLT1                           | 0,980969198                | 6159500000              |
| UPF0505 protein C16orf62                                                                                                    | C16orf62                         | 0,980969198                | 572010000               |
| Probable E3 ubiquitin-protein ligase HERC4                                                                                  | HERC4                            | 0,980776775                | 1056400000              |
| 26S protease regulatory subunit 6B                                                                                          | PSMC4                            | 0,980776775                | 2312400000              |
| Mimitin, mitochondrial                                                                                                      | NDUF4F2                          | 0,980680592                | 24229000000             |
| 6-phosphogluconolactonase                                                                                                   | PGLS                             | 0,980680592                | 478740000               |
| Proteasome assembly chaperone 3                                                                                             | PSMG3                            | 0,980680592                | 12160000000             |
| Ras-related protein Rab-1B                                                                                                  | RAB1B                            | 0,980680592                | 1688200000              |
| Protein virilizer homolog                                                                                                   | KIAA1429                         | 0,980488283                | 13126000000             |
| LETM1 and EF-hand domain-containing protein 1, mitochondrial                                                                | LETM1                            | 0,980488283                | 207780000               |
| Cell division cycle and apoptosis regulator protein 1                                                                       | CCAR1                            | 0,980296049                | 1094600000              |
| Phosphatidylserine decarboxylase proenzyme;Phosphatidylserine decarboxylase alpha chain;Phosphatidylserine decarboxylase    | PISD                             | 0,980296049                | 6483300000              |
| Peptidyl-prolyl cis-trans isomerase A;Peptidyl-prolyl cis-trans isomerase A, N-terminally processed                         | PPIA                             | 0,980199961                | 841880000               |
| Thioredoxin domain-containing protein 5                                                                                     | TXNDC5;STRF8;DKFZp666134         | 0,980199961                | 524000000               |
| Serine/threonine-protein kinase WNK1                                                                                        | WNK1                             | 0,980103891                | 2074700000              |
| Histone-lysine N-methyltransferase SMYD3                                                                                    | SMYD3                            | 0,979911808                | 1472400000              |
| Ras-related protein Rab-4A                                                                                                  | RAB4A                            | 0,979911808                | 320680000               |
| Phenylalanine-tRNA ligase alpha subunit                                                                                     | FARSLA;FARSA                     | 0,979815795                | 186030000               |
| NEDD8-conjugating enzyme Ubc12                                                                                              | UBE2M                            | 0,979815795                | 2119000000              |
| DNA-directed RNA polymerase;DNA-directed RNA polymerase II subunit RPB2                                                     | POLR2B                           | 0,979623824                | 13141000000             |
| Kinetochore-associated protein 1                                                                                            | KNTC1                            | 0,979623824                | 4745600000              |
| Acylpyruvase FAHD1, mitochondrial                                                                                           | FAHD1                            | 0,979623824                | 71350000                |
| Nicalin                                                                                                                     | NCLN                             | 0,97933601                 | 364710000               |
| Ubiquitin-conjugating enzyme E2 L3                                                                                          | UBE2L3                           | 0,97924011                 | 1357300000              |
| MIP18 family protein FAM96A                                                                                                 | FAM96A                           | 0,97924011                 | 8189500000              |
| V-type proton ATPase subunit B, brain isoform                                                                               | ATP6V1B2                         | 0,979144228                | 140160000               |
| CCR4-NOT transcription complex subunit 1                                                                                    | CNOT1                            | 0,979048365                | 6152800000              |
|                                                                                                                             |                                  | 0,978856695                | 18509000000             |

|                                                                                                                        |                               |             |             |
|------------------------------------------------------------------------------------------------------------------------|-------------------------------|-------------|-------------|
| Heat shock 70 kDa protein 14                                                                                           | HSPA14                        | 0,978856695 | 1414200000  |
| 26S proteasome non-ATPase regulatory subunit 9                                                                         | PSMD9                         | 0,978856695 | 1753000000  |
| Serine/threonine-protein phosphatase PGAM5, mitochondrial                                                              | PGAM5                         | 0,978665101 | 708610000   |
| Nesprin-1                                                                                                              | SYNE1                         | 0,978665101 | 1232000000  |
| SAP domain-containing ribonucleoprotein                                                                                | CIP29;SARNP;LOC402290         | 0,978569332 | 5791400000  |
| Thimet oligopeptidase                                                                                                  | THOP1                         | 0,978473581 | 3169800000  |
| Coiled-coil domain-containing protein 134                                                                              | CCDC134                       | 0,978377785 | 392510000   |
| Acidic fibroblast growth factor intracellular-binding protein                                                          | FIBP                          | 0,978377785 | 709770000   |
| Glucose-6-phosphate 1-dehydrogenase                                                                                    | G6PD                          | 0,978090767 | 7012400000  |
| Translation initiation factor eIF-2B subunit alpha                                                                     | EIF2B1                        | 0,978090767 | 1930700000  |
| Snurportin-1                                                                                                           | SNUPN                         | 0,97799511  | 243770000   |
| AP-2 complex subunit alpha-1                                                                                           | AP2A1                         | 0,97799511  | 8739100000  |
| WASH complex subunit 7                                                                                                 | KIAA1033                      | 0,977899472 | 1344100000  |
| Phenylalanine--tRNA ligase beta subunit                                                                                | FARSB;FARSLB                  | 0,977803853 | 6296900000  |
| WD repeat-containing protein 3                                                                                         | WDR3                          | 0,977708252 | 48135000    |
| Putative adenosylhomocysteinase 3;Adenosylhomocysteinase                                                               | AHCYL2                        | 0,977708252 | 6328800000  |
| Epidermal growth factor receptor substrate 15-like 1                                                                   | EPS15L1;SPATA22               | 0,977421562 | 238920000   |
| Protein AHNAK2                                                                                                         | AHNAK2                        | 0,977326036 | 1703500000  |
| 40S ribosomal protein S30                                                                                              | FAU                           | 0,977230529 | 5315400000  |
| Sacsin                                                                                                                 | SACS                          | 0,977230529 | 50524000    |
| Serine palmitoyltransferase 3                                                                                          | SPTLC3                        | 0,97703957  | 53586000    |
| Transmembrane protein 33                                                                                               | SHINC3;TMEM33                 | 0,97703957  | 4600400000  |
| Myotrophin                                                                                                             | DKFZp761E1322;MTPN            | 0,976944119 | 2936400000  |
| E3 ubiquitin-protein ligase RNF114                                                                                     | RNF114;ZNF313                 | 0,976944119 | 611210000   |
| Histone-arginine methyltransferase CARM1                                                                               | CARM1                         | 0,976848686 | 2090600000  |
| Cyclic AMP-dependent transcription factor ATF-1                                                                        | EWSR1;ATF1 fusion;CREB1;CREM  | 0,976753272 | 221980000   |
| Nucleobindin-1                                                                                                         | NUCB1                         | 0,976657877 | 3719800000  |
| Trafficking protein particle complex subunit 12                                                                        | TRAPPCC12;CGI-87              | 0,976467142 | 150300000   |
| mRNA cap guanine-N7 methyltransferase                                                                                  | RNMT                          | 0,976371802 | 1085500000  |
| Clathrin light chain A                                                                                                 | CLTA                          | 0,976276481 | 4266100000  |
| Differentially expressed in FDCP 6 homolog                                                                             | DEF6                          | 0,97599063  | 608610000   |
| Protein phosphatase 1A                                                                                                 | PPM1A                         | 0,97599063  | 883170000   |
| V-type proton ATPase subunit G 1;V-type proton ATPase subunit G 2                                                      | ATP6V1G1;ATP6V1G2-DDX39B;AT   | 0,975800156 | 1474300000  |
| La-related protein 1                                                                                                   | LARP1                         | 0,975800156 | 7457600000  |
| GTP-binding protein SAR1a                                                                                              | SAR1A;SARA1                   | 0,975609756 | 5722700000  |
| Coatomer subunit epsilon                                                                                               | COPE                          | 0,975609756 | 402440000   |
| Signal recognition particle 54 kDa protein                                                                             | SRP54                         | 0,97541943  | 6004100000  |
| Protein Niban                                                                                                          | FAM129A                       | 0,975324295 | 2842700000  |
| TFIIH basal transcription factor complex helicase XPB subunit                                                          | EEF1A                         | 0,975229179 | 214760000   |
| Vesicle transport protein SEC20                                                                                        | ERCC3                         | 0,975229179 | 236690000   |
| Neutral cholesterol ester hydrolase 1                                                                                  | BNIP1                         | 0,975134081 | 1146900000  |
| Multifunctional protein ADE2;Phosphoribosylaminoimidazole-succinocarboxamide synthase;Phosphoribosylaminoimidazole c   | NCEH1                         | 0,975134081 | 569250000   |
| Choline-phosphate cytidylyltransferase A                                                                               | PAICS                         | 0,975134081 | 15321000000 |
| Serine/arginine-rich splicing factor 2                                                                                 | PCYT1A;hCG_2002711            | 0,974848898 | 614090000   |
| Wings apart-like protein homolog                                                                                       | SRSF2;SFRS2                   | 0,974848898 | 17980000000 |
| 26S proteasome non-ATPase regulatory subunit 7                                                                         | WAPAL                         | 0,974373965 | 1527400000  |
| Phosphate carrier protein, mitochondrial                                                                               | PSMD7                         | 0,974373965 | 20041000000 |
| V-type proton ATPase subunit H                                                                                         | SLC25A3                       | 0,974184121 | 53033000000 |
| Serine/arginine repetitive matrix protein 2                                                                            | ATP6V1H                       | 0,974089227 | 1101700000  |
| RNA polymerase-associated protein RTF1 homolog                                                                         | SRRM2;KIAA0324                | 0,973994351 | 4638100000  |
| Protein transport protein Sec24C                                                                                       | RTF1                          | 0,973994351 | 586540000   |
| Ras-related protein Rab-1A                                                                                             | SEC24C                        | 0,973994351 | 5989200000  |
| Glutaredoxin-related protein 5, mitochondrial                                                                          | RAB1A                         | 0,973994351 | 56794000000 |
| Translin-associated protein X                                                                                          | GLRX5                         | 0,973804655 | 1098200000  |
| EH domain-containing protein 4                                                                                         | TSNAX                         | 0,973804655 | 1994300000  |
| Disabled homolog 2-interacting protein                                                                                 | EHD4                          | 0,973709834 | 2853700000  |
| Eukaryotic peptide chain release factor GTP-binding subunit 1;Eukaryotic peptide chain release factor GTP-binding su   | DAB2IP                        | 0,973615033 | 2952300000  |
| Signal peptidase complex subunit 1                                                                                     | SPCS1                         | 0,973520249 | 14617000000 |
| Pre-mRNA-processing factor 6                                                                                           | SPCS1                         | 0,973425484 | 431110000   |
| Integrin-linked kinase-associated serine/threonine phosphatase 2C                                                      | PRPF6                         | 0,973425484 | 832620000   |
| Septin-7                                                                                                               | ILKAP;ILKAP3                  | 0,973425484 | 3840000000  |
| Phosphoribosyl pyrophosphate synthase-associated protein 2                                                             | SEPT7;Nbla02942;DKFZp686F172f | 0,973330738 | 17264000000 |
| Proteasome subunit alpha type-1;Proteasome subunit alpha type                                                          | PRPSAF2                       | 0,973330738 | 7611100000  |
| General vesicular transport factor p115                                                                                | PSMA1                         | 0,97323601  | 46597000000 |
| CAAX prenyl protease 1 homolog                                                                                         | USO1                          | 0,97323601  | 7380100000  |
| Proteasome subunit alpha type-7;Proteasome subunit alpha type                                                          | ZMPSTE24                      | 0,9731413   | 2419200000  |
| Integrator complex subunit 6                                                                                           | PSMA7                         | 0,973046609 | 45502000000 |
| Nck-associated protein 1-like                                                                                          | INTS6                         | 0,973046609 | 175080000   |
| Rho GTPase-activating protein 5                                                                                        | NCKAP1L                       | 0,972951936 | 3139300000  |
| Serine/threonine-protein phosphatase 6 regulatory subunit 2                                                            | ARGHAP5                       | 0,972951936 | 204020000   |
| UPF0556 protein C19orf10                                                                                               | PPP6R2                        | 0,972951936 | 645050000   |
| Exportin-7                                                                                                             | C19orf10                      | 0,972857282 | 1578600000  |
| Sodium/potassium-transporting ATPase subunit beta-3                                                                    | XPO7                          | 0,972857282 | 4984100000  |
| Vacuolar-sorting protein SNF8                                                                                          | ATP1B3                        | 0,972688028 | 403850000   |
| Transmembrane protein 147                                                                                              | SNF8                          | 0,972688028 | 1964200000  |
| ATP-dependent RNA helicase DHX8                                                                                        | TMEM147                       | 0,972573429 | 647420000   |
| Protein disulfide-isomerase A5                                                                                         | DHX8                          | 0,972573429 | 138130000   |
| Tubulin gamma-1 chain;Tubulin gamma-2 chain                                                                            | PDIAs                         | 0,972384286 | 281500000   |
| AP-4 complex subunit epsilon-1                                                                                         | TUBG1;TUBG2                   | 0,972195217 | 1616500000  |
| TBC1 domain family member 1                                                                                            | AP4E1                         | 0,972006221 | 29627000    |
| Inositol monophosphatase 1                                                                                             | TBC1D1                        | 0,97191175  | 452980000   |
| Zinc transporter 7                                                                                                     | IMP1A                         | 0,97191175  | 5167900000  |
| Band 4.1-like protein 2                                                                                                | SLC30A7                       | 0,971628449 | 667800000   |
| KH domain-containing, RNA-binding, signal transduction-associated protein 1                                            | EPB41L2                       | 0,971628449 | 939570000   |
| Lamina-associated polypeptide 2, isoforms beta/gamma;Thymopoietin;Thymopentin;Lamina-associated polypeptide 2, isoform | KHDRBS1                       | 0,971534052 | 1716700000  |
| Cofilin-1                                                                                                              | TMPO                          | 0,971439674 | 8339700000  |
| Poly [ADP-ribose] polymerase 1                                                                                         | CFL1                          | 0,971439674 | 3,1089e+11  |
| SH3 domain-binding glutamic acid-rich-like protein                                                                     | PARP1                         | 0,971250971 | 5624900000  |
| Cytosolic non-specific dipeptidase                                                                                     | SH3BGR1                       | 0,971156648 | 3882700000  |
| Cell cycle and apoptosis regulator protein 2                                                                           | CNDP2                         | 0,971156648 | 2867800000  |
| Hermansky-Pudlak syndrome 6 protein                                                                                    | CCAR2                         | 0,971156648 | 3008100000  |
| CCR4-NOT transcription complex subunit 10                                                                              | HPS6                          | 0,971062342 | 16711000    |
| GPI transamidase component FIG-T                                                                                       | CNOT10                        | 0,970988055 | 612970000   |
| Serine/arginine-rich splicing factor 6                                                                                 | PIGT                          | 0,970873786 | 227230000   |
| Serine/arginine-rich splicing factor 10                                                                                | SRSF6                         | 0,970685304 | 6294600000  |
| Tumor susceptibility gene 101 protein                                                                                  | SRSF10                        | 0,970685304 | 966300000   |
| U2 snRNP-associated SURP motif-containing protein                                                                      | TSG101                        | 0,97059109  | 1364100000  |
| Sorting nexin-15                                                                                                       | U2SURP                        | 0,97059109  | 4088300000  |
| THO complex subunit 4                                                                                                  | SNX15;hCG_2044837             | 0,970496894 | 177590000   |
| Growth hormone-inducible transmembrane protein                                                                         | ALYREF                        | 0,970402717 | 8557900000  |
| BAG family molecular chaperone regulator 2                                                                             | GHITM                         | 0,970308558 | 1886100000  |
| Serine/threonine-protein kinase SMG1                                                                                   | BAG2                          | 0,970308558 | 1624500000  |
| Protein diaphanous homolog 1                                                                                           | SMG1                          | 0,970308558 | 1805800000  |
| Transducin beta-like protein 2                                                                                         | DIAPH1                        | 0,970214417 | 34398000000 |
| Atlastin-3                                                                                                             | TBL2                          | 0,970214417 | 852500000   |
| Protein transport protein Sec23B                                                                                       | ATL3                          | 0,970120295 | 1809600000  |
| Queuine tRNA-ribosyltransferase                                                                                        | SEC23B                        | 0,970026191 | 5291700000  |
|                                                                                                                        | QTRT1                         | 0,969932105 | 88242000    |



|                                                                                                                            |                             |             |             |
|----------------------------------------------------------------------------------------------------------------------------|-----------------------------|-------------|-------------|
| Tropomyosin alpha-3 chain                                                                                                  | TPM3;DKFZp686J1372          | 0,969932105 | 96451000000 |
| Cyclin-L1                                                                                                                  | CCNL1                       | 0,969838037 | 45779000    |
| PRKCA-binding protein                                                                                                      | PICK1                       | 0,969743988 | 87643000    |
| Nuclear cap-binding protein subunit 1                                                                                      | NCBP1                       | 0,969649956 | 4927400000  |
| Proteasome subunit alpha type;Proteasome subunit alpha type-2                                                              | PSMA2                       | 0,969555943 | 26212000000 |
| Dedicator of cytokinesis protein 8                                                                                         | DOCK8                       | 0,969461949 | 8933200000  |
| Ubiquitin carboxyl-terminal hydrolase 7;Ubiquitin carboxyl-terminal hydrolase                                              | USP7                        | 0,969367972 | 13669000000 |
| Cytochrome b-c1 complex subunit 1, mitochondrial                                                                           | UQCRC1                      | 0,969180074 | 12352000000 |
| tRNA-dihydrouridine(47) synthase [NAD(P)(+)]-like;tRNA-dihydrouridine(47) synthase [NAD(P)(+)]                             | DUS3L                       | 0,968992248 | 426030000   |
| Vacuolar protein-sorting-associated protein 25                                                                             | VPS25                       | 0,968992248 | 8343300000  |
| Probable ATP-dependent RNA helicase DDX41                                                                                  | DDX41                       | 0,968898363 | 100380000   |
| GDP-mannose 4,6 dehydratase                                                                                                | GMDS                        | 0,968804495 | 2367400000  |
| Uridine-cytidine kinase 1                                                                                                  | UCK1                        | 0,968804495 | 55067000    |
| Ribosomal RNA processing protein 1 homolog A                                                                               | RRP1                        | 0,968616815 | 87701000    |
| Integrin beta-1                                                                                                            | ITGB1                       | 0,968616815 | 2374200000  |
| Proteasome assembly chaperone 2                                                                                            | PSMG2                       | 0,968523002 | 1061500000  |
| Proteasome activator complex subunit 4                                                                                     | PSME4                       | 0,968335431 | 1598000000  |
| H/ACA ribonucleoprotein complex subunit 4                                                                                  | DKC1                        | 0,968335431 | 1207800000  |
| Lysosome-associated membrane glycoprotein 1                                                                                | LAMP1                       | 0,968335431 | 2835000000  |
| Cell division cycle protein 23 homolog                                                                                     | CDC23                       | 0,968335431 | 1542900000  |
| Fatty acid synthase:[Acyl-carrier-protein] S-acyltransferase:[Acyl-carrier-protein] S-malonyltransferase;3-oxoacyl-[acyl-c | FASN                        | 0,968241673 | 18387000000 |
| GrpE protein homolog;GrpE protein homolog 1, mitochondrial                                                                 | GRPEL1                      | 0,967866822 | 6113500000  |
| Vacuolar protein sorting-associated protein 29                                                                             | VPS29;DKFZp667O202          | 0,967679505 | 12279000000 |
| Serine hydroxymethyltransferase;Serine hydroxymethyltransferase, cytosolic                                                 | SHMT1                       | 0,967585873 | 3274900000  |
| Vacuolar protein sorting-associated protein 51 homolog                                                                     | VPS51                       | 0,967585873 | 277390000   |
| Protein asunder homolog                                                                                                    | ASUN                        | 0,967585873 | 274150000   |
| Profilin-1                                                                                                                 | PFN1                        | 0,967492226 | 19762000000 |
| Glycolipid transfer protein                                                                                                | GLTP                        | 0,967492226 | 1487100000  |
| Serine palmitoyltransferase 2                                                                                              | SPTLC2                      | 0,967398665 | 453610000   |
| U4/U6.U5 small nuclear ribonucleoprotein 27 kDa protein                                                                    | hCG_1994066;SNRNP27         | 0,967398665 | 109290000   |
| Putative small integral membrane protein 11-like                                                                           | SMIM11P1                    | 0,967305088 | 53885000    |
| WD repeat-containing protein 74                                                                                            | WDR74                       | 0,967305088 | 167510000   |
| Catalase                                                                                                                   | CAT                         | 0,967211529 | 1247100000  |
| Platelet-activating factor acetylhydrolase IB subunit beta                                                                 | PAFAH1B2                    | 0,967211529 | 8856800000  |
| Target of rapamycin complex 2 subunit MAPKAP1                                                                              | MAPKAP1                     | 0,967211529 | 17709000    |
| Cyclin-dependent kinase 11A;Cyclin-dependent kinase 11B                                                                    | CDK11B;CDK11A;CDC2L1;CDC2L2 | 0,967211529 | 610380000   |
| Activating signal cointegrator 1 complex subunit 1                                                                         | ASCC1                       | 0,967211529 | 239400000   |
| Annexin A4;Annexin                                                                                                         | ANXA4                       | 0,967024466 | 12024000000 |
| Septin-8                                                                                                                   |                             | 0,966930961 | 877020000   |
| Vacuolar protein sorting-associated protein 35                                                                             | VPS35;DKFZp686O2462         | 0,966650556 | 16269000000 |
| RNA 3-terminal phosphate cyclase                                                                                           | RTCA                        | 0,966650556 | 48183000    |
| Very long-chain specific acyl-CoA dehydrogenase, mitochondrial                                                             | ACADVL                      | 0,966557124 | 608850000   |
| Pyridoxal phosphate phosphatase                                                                                            | PDXP                        | 0,966557124 | 536070000   |
| Transformer-2 protein homolog beta                                                                                         | DKFZp686F18120;TRA2B        | 0,966557124 | 2910700000  |
| General transcription factor II-I                                                                                          | GTF2I                       | 0,966370313 | 5985600000  |
| Developmentally-regulated GTP-binding protein 2                                                                            | DRG2                        | 0,966370313 | 5515600000  |
| E3 ubiquitin-protein ligase HECTD3                                                                                         | HECTD3                      | 0,966090233 | 74488000    |
| Interleukin enhancer-binding factor 3                                                                                      | ILF3                        | 0,966090233 | 1355200000  |
| Rho GTPase-activating protein 1                                                                                            | ARHGAP1                     | 0,965996909 | 2229600000  |
| Splicing factor U2AF 35 kDa subunit                                                                                        | U2AF1                       | 0,965903603 | 8438300000  |
| Ras-related protein Ral-A                                                                                                  | RALA;RALB                   | 0,965903603 | 2989300000  |
| Argininosuccinate synthase                                                                                                 | ASS;ASS1                    | 0,965717045 | 766590000   |
| Vacuolar protein sorting-associated protein 26A                                                                            | VPS26A                      | 0,965623793 | 6830900000  |
| RuvB-like 1                                                                                                                | RUVBL1                      | 0,965530559 | 22892000000 |
| Coatomer subunit delta                                                                                                     | ARCN1;DKFZp686M09245        | 0,965250965 | 7647600000  |
| PITH domain-containing protein 1                                                                                           | PITHD1                      | 0,965157803 | 1961800000  |
| Echinoderm microtubule-associated protein-like 3                                                                           | EML3                        | 0,965157803 | 117440000   |
| tRNA-splicing endonuclease subunit Sen34                                                                                   | TSEN34                      | 0,965157803 | 84055000    |
| Ras-related protein Rab-3D                                                                                                 | RAB3D                       | 0,965064659 | 359000000   |
| Arfaptin-2                                                                                                                 | ARFIP2                      | 0,965064659 | 197960000   |
| CDP-diacylglycerol--inositol 3-phosphatidyltransferase                                                                     | CDIPT                       | 0,964878425 | 2842100000  |
| FGFR1 oncogene partner 2                                                                                                   | FGFR1OP2                    | 0,964692263 | 112440000   |
| cAMP-dependent protein kinase catalytic subunit gamma                                                                      | PRKACG                      | 0,964692263 | 893380000   |
| Pantothenate kinase 3;Pantothenate kinase 1                                                                                | PANK3;PANK1                 | 0,964599209 | 91175000    |
| Sodium/potassium-transporting ATPase subunit alpha-1                                                                       | ATP1A1                      | 0,964413155 | 31610000000 |
| Ankyrin repeat and FYVE domain-containing protein 1                                                                        | ANKFY1;DKFZp686M19106       | 0,964320154 | 3129100000  |
| Tubulin alpha-8 chain                                                                                                      | TUBA8;DKFZp686L04275        | 0,964320154 | 3817100000  |
| N(4)-(beta-N-acetylglucosaminyl)-L-asparaginase;Glycosylasparaginase alpha chain;Glycosylasparaginase beta chain           | AGA                         | 0,964134207 | 627640000   |
| Coatomer subunit zeta-1                                                                                                    | COPZ1                       | 0,964134207 | 5352900000  |
| Tubulin beta chain                                                                                                         | TUBB;XTP3TPATP1             | 0,963948332 | 46888000000 |
| Phosphatidylcholine transfer protein                                                                                       | PCTP                        | 0,963855422 | 52728000    |
| Far upstream element-binding protein 1                                                                                     | FUBP1                       | 0,963855422 | 14966000000 |
| Stathmin-2;Stathmin                                                                                                        | STMN2                       | 0,963669654 | 3110200000  |
| Coatomer subunit beta                                                                                                      | COPB2                       | 0,963391137 | 14487000000 |
| UDP-glucose:glycoprotein glucosyltransferase 1                                                                             | UGGT1                       | 0,963298333 | 18330000000 |
| 14 kDa phosphohistidine phosphatase                                                                                        | PHP14;PHPT1                 | 0,963112781 | 413060000   |
| Peptidyl-prolyl cis-trans isomerase;Peptidyl-prolyl cis-trans isomerase FKBP3                                              | FKBP3                       | 0,963020031 | 7215600000  |
| E3 ubiquitin-protein ligase RNF123                                                                                         | RNF123                      | 0,963020031 | 461990000   |
| UPF0598 protein C8orf82                                                                                                    | C8orf82                     | 0,962927299 | 40713000    |
| Protein flightless-1 homolog                                                                                               | FLII                        | 0,962927299 | 7729300000  |
| LanC-like protein 1                                                                                                        | LANCL1                      | 0,962741889 | 1135400000  |
| BolA-like protein 2                                                                                                        | BOLA2B;BOLA2                | 0,962649211 | 671040000   |
| WD repeat-containing protein mio                                                                                           | MIOS                        | 0,962649211 | 134890000   |
| Interferon regulatory factor 2-binding protein-like                                                                        | IRF2BPL                     | 0,962556555 | 3023000000  |
| Wiskott-Aldrich syndrome protein                                                                                           | WAS                         | 0,962371283 | 1985600000  |
| Cdc42-interacting protein 4                                                                                                | STP;TRIP10                  | 0,962371283 | 153940000   |
| N-acetyltransferase 10                                                                                                     | NAT10                       | 0,962278676 | 1799100000  |
| Suppressor of G2 allele of SKP1 homolog                                                                                    | SUGT1                       | 0,962093515 | 2278800000  |
| Transcription elongation factor B polypeptide 2                                                                            | TCEB2                       | 0,962000962 | 5543200000  |
| Transforming protein RhoA                                                                                                  | RHOA;RHOC;ARHA              | 0,961908426 | 40522000000 |
| RNA-binding protein 7                                                                                                      | RBM7                        | 0,961908426 | 533370000   |
| Complement component 1 Q subcomponent-binding protein, mitochondrial                                                       | C1QBP                       | 0,961815908 | 1430300000  |
| Deoxynucleoside triphosphate triphosphohydrolase SAMHD1                                                                    | SAMHD1                      | 0,961815908 | 2328400000  |
| Pseudouridylyl synthase 7 homolog                                                                                          | PUS7                        | 0,961815908 | 1797600000  |
| Ubiquitin carboxyl-terminal hydrolase 5                                                                                    | USP5                        | 0,961630926 | 5276700000  |
| AP-1 complex subunit mu-1                                                                                                  | AP1M1                       | 0,961630926 | 9278200000  |
| Transmembrane protein 165                                                                                                  | TMEM165                     | 0,961538462 | 810860000   |
| Serine/threonine-protein phosphatase 2B catalytic subunit alpha isoform;Serine/threonine-protein phosphatase               | PPP3CA                      | 0,961538462 | 30703000000 |
| COMM domain-containing protein 3                                                                                           | COMMD3;COMMD3-BM11          | 0,961538462 | 985780000   |
| Signal recognition particle 14 kDa protein                                                                                 | SRP14                       | 0,961538462 | 2380400000  |
| Mediator of RNA polymerase II transcription subunit 1                                                                      | MED1                        | 0,961446015 | 39946000    |
| Polyglutamine-binding protein 1                                                                                            | PQB1                        | 0,961353586 | 1035900000  |
| Protein archaease                                                                                                          | ZBTB80S                     | 0,961353586 | 679150000   |
| COMM domain-containing protein 4                                                                                           | COMMD4                      | 0,961168781 | 1077600000  |
| CDGSH iron-sulfur domain-containing protein 2                                                                              | CISD2                       | 0,960799385 | 3190300000  |
| Mediator of RNA polymerase II transcription subunit 4                                                                      | MED4                        | 0,960799385 | 413470000   |
| DAZ-associated protein 1                                                                                                   | DAZAP1;DAZAP1/MEF2D fusion  | 0,960799385 | 4574800000  |
| NEDD8                                                                                                                      | NEDD8;NEDD8-MDP1            | 0,96070708  | 9929800000  |

|                                                                                                                                            |                                |             |             |
|--------------------------------------------------------------------------------------------------------------------------------------------|--------------------------------|-------------|-------------|
| E3 ubiquitin-protein ligase UBR1                                                                                                           | UBR1                           | 0,96070708  | 1234700000  |
| Ras-related protein Rab-5B                                                                                                                 | RAB5B                          | 0,960614793 | 15131000000 |
| Protein misato homolog 1                                                                                                                   | MSTO1                          | 0,960614793 | 101140000   |
| Serine/threonine-protein kinase 38-like                                                                                                    | STK38L                         | 0,960614793 | 228510000   |
| Vesicle-associated membrane protein-associated protein B/C                                                                                 | VAPB                           | 0,960522524 | 1686400000  |
| Endoplasmic reticulum-Golgi intermediate compartment protein 2                                                                             | ERGIC2;RLN3                    | 0,960522524 | 353770000   |
| Serine/threonine-protein phosphatase 6 regulatory ankyrin repeat subunit A                                                                 | ANKRD28                        | 0,960430273 | 915060000   |
| Tumor protein D54                                                                                                                          | TPD52L2;DKFZp686A1765          | 0,960338039 | 4007800000  |
| Small integral membrane protein 15                                                                                                         | SMIM15                         | 0,959969281 | 221340000   |
| Phosphoinositide phospholipase C;1-phosphatidylinositol 4,5-bisphosphate phosphodiesterase gamma-1                                         | DKFZp434N101;PLCG1 variant pro | 0,959969281 | 570120000   |
| Ras-related protein Rab-6A                                                                                                                 | RAB6A                          | 0,959877136 | 28338000000 |
| Putative ATP-dependent RNA helicase DHX57                                                                                                  | DHX57                          | 0,959785008 | 225850000   |
| Protein SMG8                                                                                                                               | SMG8                           | 0,959785008 | 284490000   |
| Receptor expression-enhancing protein 4                                                                                                    | REEP4                          | 0,959785008 | 9345800     |
| Protein transport protein Sec61 subunit gamma                                                                                              | SEC61G                         | 0,959600806 | 935030000   |
| Ras-related C3 botulinum toxin substrate 1;Ras-related C3 botulinum toxin substrate 3                                                      | RAC1;RAC3                      | 0,959232614 | 17014000000 |
| Extended synaptotagmin-1                                                                                                                   | ESYT1                          | 0,959232614 | 22670000000 |
| Small nuclear ribonucleoprotein E                                                                                                          | SNRPE                          | 0,959232614 | 4893300000  |
| Protein phosphatase 1 regulatory subunit 11                                                                                                | PPP1R11                        | 0,959232614 | 148410000   |
| Cytoplasmic dynein 1 intermediate chain 2                                                                                                  | DYNC1I2                        | 0,959140611 | 1870600000  |
| Cell growth-regulating nucleolar protein                                                                                                   | LYAR                           | 0,959140611 | 182490000   |
| HEAT repeat-containing protein 5B                                                                                                          | HEATR5B                        | 0,959140611 | 1256800000  |
| Terminal uridylyltransferase 4                                                                                                             | ZCCHC11                        | 0,959048624 | 106520000   |
| Signal transducer and activator of transcription;Signal transducer and activator of transcription 5A                                       | STAT5A                         | 0,959048624 | 481370000   |
|                                                                                                                                            |                                | 0,959048624 | 402880000   |
| Coatamer subunit beta                                                                                                                      | COPB1                          | 0,958956655 | 23061000000 |
| Golgin subfamily A member 2                                                                                                                | GOLGA2                         | 0,958680855 | 332330000   |
| Signal recognition particle subunit SRP72                                                                                                  | SRP72                          | 0,958497077 | 6518400000  |
|                                                                                                                                            |                                | 0,958313368 | 186810000   |
| Copper chaperone for superoxide dismutase;Superoxide dismutase [Cu-Zn]                                                                     | CCS                            | 0,958221541 | 355730000   |
| Nuclear migration protein nudC                                                                                                             | NUDC                           | 0,958037938 | 12501000000 |
| Proline-, glutamic acid- and leucine-rich protein 1                                                                                        | PELP1                          | 0,958037938 | 572750000   |
| Transmembrane protein 258                                                                                                                  | TMEM258                        | 0,957854406 | 111760000   |
| N-terminal kinase-like protein                                                                                                             | SCYL1                          | 0,957854406 | 383110000   |
| Sphingosine kinase 2                                                                                                                       | SPHK2                          | 0,957854406 | 135040000   |
| Dihydroorotate dehydrogenase (quinone), mitochondrial                                                                                      | DHODH                          | 0,957762666 | 1035100000  |
| Isopentenyl-diphosphate Delta-isomerase 1                                                                                                  | IDI1                           | 0,957762666 | 1038500000  |
| Bcl-2 homologous antagonist/killer                                                                                                         | BAK;DKFZp686D0345;BAK1         | 0,957670944 | 2051300000  |
| Glycogen synthase kinase-3 alpha                                                                                                           | DKFZp686D0638;GSK3A            | 0,957487553 | 2066000000  |
| Methionine--tRNA ligase, cytoplasmic                                                                                                       | MARS                           | 0,957487553 | 3653000000  |
| NSFL1 cofactor p47                                                                                                                         | NSFL1C                         | 0,957395883 | 10464000000 |
| Septin-11                                                                                                                                  |                                | 0,957395883 | 14816000000 |
| Probable global transcription activator SNF2L2                                                                                             | SMARCA2                        | 0,957395883 | 174780000   |
| Integrin beta;Integrin beta-2                                                                                                              | ITGB2                          | 0,957212597 | 778510000   |
| Peptidyl-prolyl cis-trans isomerase B                                                                                                      | PIIB                           | 0,95712098  | 48273000000 |
| Transcription elongation factor A protein 1                                                                                                | TCEA1                          | 0,95712098  | 18083000000 |
| Calcium homeostasis endoplasmic reticulum protein                                                                                          | CHERP                          | 0,957029381 | 2787700000  |
| Nucleolar protein 56                                                                                                                       | NOP56                          | 0,956754688 | 2088400000  |
| SPRY domain-containing protein 4                                                                                                           | SPRYD4                         | 0,956754688 | 326540000   |
| Isochorismatase domain-containing protein 1                                                                                                | ISOC1                          | 0,956754688 | 3770600000  |
| Trafficking protein particle complex subunit 3                                                                                             | TRAPPC3                        | 0,956663159 | 1186800000  |
| Leukotriene A(4) hydrolase;Leukotriene A-4 hydrolase                                                                                       | LT4AH                          | 0,956663159 | 11032000000 |
| DNA polymerase;DNA polymerase epsilon catalytic subunit A                                                                                  | POLE;POLE1                     | 0,956663159 | 969340000   |
| Serine/threonine-protein phosphatase 2A 55 kDa regulatory subunit B delta isoform;Serine/threonine-protein phosphatase 2A PPP2R2D          | PPP2R2D                        | 0,956663159 | 639540000   |
| Lysine--tRNA ligase                                                                                                                        | KARS                           | 0,956571647 | 6846400000  |
| Ancient ubiquitous protein 1                                                                                                               | DKFZp686P12272;AUP1            | 0,956571647 | 269310000   |
| Josephin-2                                                                                                                                 | JOSD2                          | 0,956388676 | 191790000   |
| Serine/threonine-protein kinase 24;Serine/threonine-protein kinase 24 36 kDa subunit;Serine/threonine-protein kinase 24 12 ISTK24;HEL-S-95 | ISTK24;HEL-S-95                | 0,956388676 | 1003600000  |
| Translocon-associated protein subunit alpha                                                                                                | SSR1                           | 0,956297217 | 11703000000 |
| Dolichyl-diphosphooligosaccharide--protein glycosyltransferase 48 kDa subunit                                                              | DDOST                          | 0,956297217 | 24564000000 |
|                                                                                                                                            | LRRFIP1                        | 0,956297217 | 942550000   |
| Vacuolar protein sorting-associated protein 13B                                                                                            | VPS13B                         | 0,956022945 | 188360000   |
| Adenylosuccinate lyase                                                                                                                     | ADSL                           | 0,955931555 | 3034300000  |
| Trafficking protein particle complex subunit 1                                                                                             | TRAPPC1                        | 0,955748829 | 335800000   |
| WD repeat-containing protein 7                                                                                                             | WDR7                           | 0,955657492 | 2147500000  |
|                                                                                                                                            |                                | 0,955657492 | 135060000   |
| E3 ubiquitin-protein ligase NEDD4                                                                                                          | NEDD4                          | 0,955474871 | 8684000000  |
| Golgin subfamily A member 3                                                                                                                | GOLGA3                         | 0,955474871 | 527700000   |
| Protein O-glucosyltransferase 1                                                                                                            | POGLUT1                        | 0,955383587 | 1541500000  |
| Uncharacterized protein C1orf106                                                                                                           | C1orf106                       | 0,955292319 | 973170000   |
| ADP-ribosylation factor-like protein 3                                                                                                     | ARL3                           | 0,955292319 | 3616800000  |
| Diphosphoinositol polyphosphate phosphohydrolase 2                                                                                         | NUDT4                          | 0,95520107  | 121940000   |
| GTP-binding protein Rheb                                                                                                                   | RHEB                           | 0,95520107  | 873070000   |
| Cyclin-dependent-like kinase 5                                                                                                             | CDK5                           | 0,955109838 | 2913300000  |
| Eukaryotic translation initiation factor 4E                                                                                                | EIF4E                          | 0,955109838 | 12739000000 |
| Centromere/kinetochore protein zw10 homolog                                                                                                | ZW10                           | 0,955018623 | 391350000   |
| Ras-related protein Rab-2B                                                                                                                 | DKFZp313C1541;RAB2B            | 0,954927426 | 792820000   |
| Integrator complex subunit 2                                                                                                               | INTS2                          | 0,954927426 | 388170000   |
| Exocyst complex component 3                                                                                                                | EXO3;DKFZp762K123              | 0,954836246 | 351640000   |
| WD repeat and FYVE domain-containing protein 1                                                                                             | WDFY1                          | 0,954836246 | 174040000   |
| AP-1 complex subunit gamma-1                                                                                                               | AP1G1                          | 0,954836246 | 3927000000  |
| Arf-GAP with coiled-coil, ANK repeat and PH domain-containing protein 2                                                                    | ACAP2                          | 0,954745083 | 973610000   |
| Nodal modulator 2;Nodal modulator 3;Nodal modulator 1                                                                                      | NOMO3;NOMO2;NOMO1              | 0,954653938 | 6848000000  |
| Charged multivesicular body protein 2a                                                                                                     | CHMP2A                         | 0,954653938 | 12112000000 |
| CAD protein;Glutamine-dependent carbamoyl-phosphate synthase;Aspartate carbamoyltransferase;Dihydroorotase                                 | CAD                            | 0,954653938 | 52130000000 |
| Hematopoietic lineage cell-specific protein                                                                                                | HCLS1                          | 0,95456281  | 134510000   |
| CDGSH iron-sulfur domain-containing protein 1                                                                                              | CISD1                          | 0,9544717   | 1083800000  |
| Tyrosine-protein kinase ABL1                                                                                                               | BCR/ABL fusion;ABL1            | 0,954380607 | 950340000   |
| Protein FAM50A;Protein FAM50B                                                                                                              | FAM50A;FAM50B                  | 0,954198473 | 1829700000  |
| U3 small nucleolar RNA-associated protein 18 homolog                                                                                       | UTP18                          | 0,954107432 | 759740000   |
| Valine--tRNA ligase                                                                                                                        | VARS                           | 0,954107432 | 3934100000  |
| Coiled-coil domain-containing protein 132                                                                                                  | CCDC132;FLJ20097;DKFZp313I24   | 0,954107432 | 205590000   |
| H/ACA ribonucleoprotein complex subunit 3                                                                                                  | NOP10                          | 0,953925403 | 173960000   |
| Cytochrome c oxidase assembly factor 3 homolog, mitochondrial                                                                              | COA3                           | 0,953652489 | 285910000   |
| Signal recognition particle subunit SRP68                                                                                                  | SRP68                          | 0,953652489 | 5754900000  |
| Trafficking protein particle complex subunit 10                                                                                            | TRAPPC10                       | 0,953561552 | 153280000   |
| Tripeptidyl-peptidase 2                                                                                                                    | TPP2                           | 0,953470633 | 24494000000 |
| FACT complex subunit SSRP1                                                                                                                 | SSRP1                          | 0,953470633 | 3937000000  |
| Malate dehydrogenase;Malate dehydrogenase, mitochondrial                                                                                   | MDH2                           | 0,953197979 | 1,2636E+11  |
| Nuclear envelope phosphatase-regulatory subunit 1                                                                                          | FLJ38101;CNEP1R1               | 0,953197979 | 226370000   |
| Cysteine--tRNA ligase, cytoplasmic                                                                                                         | CARS                           | 0,953197979 | 4409700000  |
| Actin-related protein 2/3 complex subunit 3                                                                                                | ARPC3                          | 0,952925481 | 13092000000 |
| ATP-binding cassette sub-family F member 1                                                                                                 | ABCF1                          | 0,952925481 | 4378500000  |
| U6 snRNA-associated Sm-like protein LSM6                                                                                                   | LSM6                           | 0,952834683 | 2793800000  |
| Prothymosin alpha;Prothymosin alpha, N-terminally processed;Thymosin alpha-1                                                               | PTMA;PTMAP7                    | 0,952834683 | 1942800000  |
| Iron-sulfur cluster assembly 2 homolog, mitochondrial                                                                                      | ISCA2                          | 0,952653139 | 459490000   |
| NAD-dependent malic enzyme, mitochondrial                                                                                                  | ME2                            | 0,952653139 | 2950500000  |
| Rab11 family-interacting protein 1;Rab11 family-interacting protein 2                                                                      | RAB11FIP1;RAB11FIP2            | 0,952653139 | 4397100000  |

|                                                                                                                          |                               |             |             |
|--------------------------------------------------------------------------------------------------------------------------|-------------------------------|-------------|-------------|
| Dynactin subunit 1                                                                                                       | DCTN1;DKFZp686I0746;DKFZp686  | 0,952562393 | 9292500000  |
| Protein DENND6A                                                                                                          | DENND6A                       | 0,952562393 | 14182000    |
|                                                                                                                          | ACT                           | 0,952471664 | 1180100000  |
| DDB1- and CUL4-associated factor 7                                                                                       | DCAF7                         | 0,952380952 | 172820000   |
| Coatomer subunit gamma-1                                                                                                 | COPG1;COPG                    | 0,952380952 | 1509000000  |
| Talin-2                                                                                                                  | TLN2                          | 0,952380952 | 160080000   |
| Thymidylate kinase                                                                                                       | DTYMK                         | 0,952108921 | 1028600000  |
| Cysteine protease ATG4B                                                                                                  | ATG4B;DKFZp686G0859           | 0,951927653 | 719730000   |
| Copine-3                                                                                                                 | CPNE3                         | 0,951927653 | 455740000   |
| ATP synthase subunit e, mitochondrial                                                                                    | ATP5f                         | 0,951837045 | 2204300000  |
| 14-3-3 protein epsilon                                                                                                   | YWHAE;YWHAE/FAM22B fusion;VY  | 0,951837045 | 2,8722E+11  |
| Integrin alpha-L                                                                                                         | ITGAL                         | 0,951746455 | 171680000   |
| Kinesin-like protein KIF13B                                                                                              | KIF13B                        | 0,951655881 | 325050000   |
| LDLR chaperone MESD                                                                                                      | MESDC2                        | 0,951655325 | 4737400000  |
| Mediator of RNA polymerase II transcription subunit 18                                                                   | MED18                         | 0,951474786 | 382720000   |
| Ras-related protein Rab-27A                                                                                              | RAB27A                        | 0,951384264 | 295190000   |
| Inositol monophosphatase 2                                                                                               | IMPA2                         | 0,951384264 | 1120500000  |
| Elongator complex protein 1                                                                                              | DKFZp781H1425;IKBKAP;IKBKAP v | 0,951384264 | 2337700000  |
| Matrin-3                                                                                                                 | MATR3;DKFZp686K23100          | 0,95129376  | 1452800000  |
| Centrobin                                                                                                                | CNTROB                        | 0,951203272 | 197460000   |
| Dynein light chain roadblock-type 1;Dynein light chain roadblock-type 2                                                  | DYNLRB1;DYNLRB2               | 0,951022349 | 832870000   |
| Phosphatidylglycerophosphatase and protein-tyrosine phosphatase 1                                                        | PTPMT1                        | 0,950841495 | 33214000    |
| Stress-induced-phosphoprotein 1                                                                                          | STIP1                         | 0,950660709 | 3164900000  |
| UV excision repair protein RAD23 homolog A                                                                               | RAD23A                        | 0,950660709 | 367010000   |
| Ubiquitin-like-conjugating enzyme ATG3                                                                                   | ATG3                          | 0,950660709 | 928420000   |
| WASH complex subunit strumpellin                                                                                         | KIAA0196                      | 0,950570342 | 1821200000  |
| Vacuolar protein sorting-associated protein 11 homolog                                                                   | VPS11;DKFZp564P2364           | 0,950479992 | 245660000   |
| HIV Tat-specific factor 1                                                                                                | HTATSF1                       | 0,950118765 | 197800000   |
| Proteasome subunit beta type;Proteasome subunit beta type-7                                                              | PSMB7                         | 0,949938254 | 1103600000  |
| Ankyrin repeat and EF-hand domain-containing protein 1                                                                   | ANKRD5;ANKF1                  | 0,949848024 | 1333600000  |
| Leucyl-cystinyl aminopeptidase;Leucyl-cystinyl aminopeptidase, pregnancy serum form                                      | LNPEP                         | 0,949667616 | 308800000   |
| RuvB-like 2                                                                                                              | RUVBL2                        | 0,949667616 | 2311700000  |
| Transmembrane protein 189                                                                                                | TMEM189                       | 0,949667616 | 66057000    |
| Homeobox protein CDX-1                                                                                                   | CDX1                          | 0,949577438 | 1216000000  |
| Sarcoplasmic/endoplasmic reticulum calcium ATPase 2                                                                      | ATP2A2                        | 0,949487277 | 2401100000  |
| Sorting nexin-3                                                                                                          | SNX3                          | 0,949397133 | 438410000   |
| TBC1 domain family member 14                                                                                             | TBC1D14                       | 0,949216896 | 117810000   |
| Golgi-specific brefeldin A-resistance guanine nucleotide exchange factor 1                                               | GBF1                          | 0,949216896 | 6593100000  |
| N-acylneuraminate cytidyltransferase                                                                                     | CMAS                          | 0,949126803 | 2934900000  |
| DCC-interacting protein 13-alpha                                                                                         | APPL1                         | 0,949126803 | 862530000   |
| E3 UFM1-protein ligase 1                                                                                                 | UFL1                          | 0,949126803 | 802130000   |
| Heterogeneous nuclear ribonucleoprotein R                                                                                | HNRNPR;HNRPR;DKFZp686A1325    | 0,949126803 | 2286000000  |
| Mitochondrial import inner membrane translocase subunit Tim17-B                                                          | TIMM17B                       | 0,949036728 | 243250000   |
| Vitamin K epoxide reductase complex subunit 1-like protein 1                                                             | VKORC1L1                      | 0,948946669 | 545390000   |
| Cytochrome c oxidase copper chaperone                                                                                    | COX17                         | 0,948856628 | 56053000    |
| Proteasome subunit alpha type-4;Proteasome subunit alpha type;Proteasome subunit beta type                               | PSMA4                         | 0,948856628 | 2655400000  |
| Sorting nexin-6;Sorting nexin-6, N-terminally processed                                                                  | SNX6                          | 0,948766603 | 532880000   |
| Calpain-1 catalytic subunit                                                                                              | CAPN1                         | 0,948586606 | 2616000000  |
| Drebrin-like protein                                                                                                     | DBNL                          | 0,948586606 | 600850000   |
| Leucine-rich repeat-containing protein 40                                                                                | LRRC40                        | 0,948586606 | 584970000   |
| Ras-related protein Rab-21                                                                                               | RAB21                         | 0,948496633 | 1171700000  |
| Serine/arginine-rich splicing factor 7                                                                                   | SRSF7                         | 0,948496633 | 3697900000  |
| Transmembrane 9 superfamily member 2                                                                                     | TMS9F2                        | 0,948316738 | 1389000000  |
| Vacuolar protein sorting-associated protein 53 homolog                                                                   | HCCS1;VPS53                   | 0,948316738 | 158960000   |
| Ubiquitin-conjugating enzyme E2 G1;Ubiquitin-conjugating enzyme E2 G1, N-terminally processed                            | UBE2G1                        | 0,948047023 | 1710500000  |
| Acetyl-CoA carboxylase 1;Biotin carboxylase                                                                              | ACACA                         | 0,948047023 | 9537300000  |
| V-type proton ATPase subunit D                                                                                           | VATD;ATP6V1D                  | 0,947867299 | 2053000000  |
| Mitochondrial import inner membrane translocase subunit Tim23;Putative mitochondrial import inner membrane translocase 5 | TIMM23;TIMM23B                | 0,947687642 | 1419500000  |
| Sigma non-opioid intracellular receptor 1                                                                                | hCG_20471;SIGMAR1             | 0,947597839 | 2027100000  |
| Histone-lysine N-methyltransferase SETD2                                                                                 | SETD2                         | 0,947149081 | 150980000   |
| SNARE-associated protein Snapin                                                                                          | SNAPIN                        | 0,947059381 | 432320000   |
| Dolichyl-diphosphooligosaccharide--protein glycosyltransferase subunit 1                                                 | RPN1                          | 0,946880003 | 2499100000  |
| Major vault protein                                                                                                      | MVP                           | 0,946790381 | 1165500000  |
| General transcription factor IIF subunit 1                                                                               | GTFF2F1                       | 0,946790381 | 480810000   |
| NudC domain-containing protein 2                                                                                         | NUDCC2                        | 0,946790381 | 4093600000  |
| Urotensin-2                                                                                                              | UTS2                          | 0,946700748 | 9069200000  |
| Adenosine deaminase                                                                                                      | ADA                           | 0,946521533 | 242960000   |
| Protein LZIC                                                                                                             | LZIC                          | 0,946431952 | 906450000   |
| Phosphatidate phosphatase LPIN1                                                                                          | LPIN1;DKFZp781P1796           | 0,946342387 | 639000000   |
| RNA-binding protein 25                                                                                                   | RBM25                         | 0,946252839 | 6715600000  |
| Sec1 family domain-containing protein 2                                                                                  | SCFD2                         | 0,946163308 | 58919000    |
| Mitogen-activated protein kinase kinase kinase MLT                                                                       | kk;ZAK                        | 0,946073794 | 437760000   |
| Pre-mRNA-processing factor 39                                                                                            | PRPF39                        | 0,945984297 | 213020000   |
| Protein disulfide-isomerase A6                                                                                           | PDIA6                         | 0,945805353 | 4831800000  |
| Rab3 GTPase-activating protein non-catalytic subunit                                                                     | RAB3GAP2                      | 0,945805353 | 2361400000  |
| Adenosylhomocysteinase                                                                                                   | AHCY                          | 0,945715907 | 7423600000  |
| TBC1 domain family member 8B                                                                                             | TBC1D8B                       | 0,945715907 | 406110000   |
| Glucosidase 2 subunit beta                                                                                               | PRKCSH                        | 0,945179584 | 1832100000  |
| Transcription elongation factor B polypeptide 1                                                                          | TCEB1                         | 0,945179584 | 6348800000  |
| Rab proteins geranylgeranyltransferase component A 1                                                                     | CHM                           | 0,945179584 | 42622000    |
| OCIA domain-containing protein 1                                                                                         | OCIAD1                        | 0,945090256 | 1636100000  |
| Ataxin-10                                                                                                                | ATXN10                        | 0,945000945 | 166040000   |
| Kelch domain-containing protein 4                                                                                        | KLHDC4                        | 0,945000945 | 216790000   |
| Exocyst complex component 1                                                                                              | EXOC1                         | 0,945000945 | 162160000   |
|                                                                                                                          | ACT                           | 0,944911651 | 3760400000  |
| Bcl-2-like protein 13                                                                                                    | BCL2L13;DKFZp451F173          | 0,944733113 | 135930000   |
| Rab GTPase-activating protein 1                                                                                          | RABGAP1                       | 0,944643869 | 1026200000  |
| Beta-adrenergic receptor kinase 1                                                                                        | ADRBK1                        | 0,944465433 | 575700000   |
| Lupus La protein                                                                                                         | SSB                           | 0,944465433 | 5760100000  |
| Biogenesis of lysosome-related organelles complex 1 subunit 1                                                            | BLOC1S1                       | 0,944287063 | 155380000   |
| Ufm1-specific protease 2                                                                                                 | UFP2                          | 0,944197904 | 120570000   |
| ADP-ribosylation factor 1;ADP-ribosylation factor 3                                                                      | ARF1;ARF3                     | 0,944197904 | 7146400000  |
| THO complex subunit 1                                                                                                    | THOC1                         | 0,944197904 | 135920000   |
| Ribosomal protein S6 kinase alpha-5;Ribosomal protein S6 kinase                                                          | RPS6KA5                       | 0,944108761 | 441200000   |
| Glycerophosphodiester phosphodiesterase 1                                                                                | GDE1                          | 0,944019636 | 167270000   |
| Peptidyl-prolyl cis-trans isomerase-like 1                                                                               | PP1L1                         | 0,943930527 | 2256700000  |
| Condensin complex subunit 2                                                                                              | NCAPH                         | 0,943752359 | 513260000   |
| Dolichyl-diphosphooligosaccharide--protein glycosyltransferase subunit STT3A                                             | STT3A                         | 0,943663301 | 10012000000 |
| Chitinase domain-containing protein 1                                                                                    | CHID1                         | 0,943663301 | 736600000   |
| Sorting nexin-2                                                                                                          | SNX2                          | 0,943485234 | 6642600000  |
| NADH dehydrogenase [ubiquinone] 1 alpha subcomplex subunit 13                                                            | NDUFA13                       | 0,943396226 | 1061300000  |
| Target of Myb protein 1                                                                                                  | TOM1;UNQ1844                  | 0,943396226 | 30500000    |
| Dehydrogenase/reductase SDR family member 4                                                                              | DHRS4;DHRS4L2                 | 0,943307235 | 2179700000  |
| 1-phosphatidylinositol 4,5-bisphosphate phosphodiesterase gamma-2;Phosphoinositide phospholipase C                       | PLCG2                         | 0,943218261 | 7289900000  |
| Ribose-phosphate pyrophosphokinase 2                                                                                     | PRPS2                         | 0,943218261 | 4273200000  |
| Cleavage and polyadenylation specificity factor subunit 1                                                                | CPSF1                         | 0,943129303 | 1500600000  |
| Ras-related protein Rap-2b                                                                                               | DKFZp547A0616;RAP2B           | 0,943129303 | 5262800000  |
| Endoplasmic reticulum resident protein 44                                                                                | ERP44                         | 0,943040362 | 14087000000 |

|                                                                                                                 |                                    |             |             |
|-----------------------------------------------------------------------------------------------------------------|------------------------------------|-------------|-------------|
| Serrate RNA effector molecule homolog                                                                           | SRRT                               | 0,943040362 | 10464000000 |
| Solute carrier family 25 member 40                                                                              | SLC25A40                           | 0,942951438 | 117880000   |
| Phosphatidylinositol glycan anchor biosynthesis class U protein                                                 | PIGU                               | 0,942862531 | 384790000   |
| Protein S100;Protein S100-A6                                                                                    | S100A6                             | 0,94277364  | 3548700000  |
| Akirin-2                                                                                                        | AKIRIN2                            | 0,942151875 | 667960000   |
| Flotillin-1                                                                                                     | FLOT1                              | 0,941885655 | 51517000    |
| Presqualene diphosphate phosphatase                                                                             | PPAPDC2                            | 0,941885655 | 162700000   |
| Bifunctional 3-phosphoadenosine 5-phosphosulfate synthase 1;Sulfate adenylyltransferase;Adenylyl-sulfate kinase | PAPSS1                             | 0,941796949 | 235940000   |
| Kinesin light chain 4                                                                                           | KLC4                               | 0,94144229  | 73470000    |
| HRAS-like suppressor 3                                                                                          | PLA2G16                            | 0,941353667 | 112050000   |
| Proteasome-associated protein ECM29 homolog                                                                     | ECM29;KIAA0368                     | 0,941353667 | 19462000000 |
| Ras GTPase-activating-like protein IQGAP1                                                                       | IQGAP1                             | 0,94126506  | 50432000000 |
| Dolchyl-diphosphooligosaccharide--protein glycosyltransferase subunit 2                                         | RPN2                               | 0,941176471 | 12701000000 |
| Pre-mRNA-splicing factor 18                                                                                     | PRPF18;LOC101928524                | 0,941176471 | 128830000   |
| Testin                                                                                                          | TES                                | 0,941176471 | 23060000000 |
| Vacuolar protein sorting-associated protein 26B                                                                 | VPS26B                             | 0,941087898 | 3213100000  |
| Sister chromatid cohesion protein PDS5 homolog A                                                                | PDS5A                              | 0,940999341 | 19237000000 |
| Transmembrane emp24 domain-containing protein 5                                                                 | TMED5                              | 0,940822279 | 3918000000  |
| Cell cycle control protein 50A                                                                                  | TMED30A                            | 0,940733772 | 123340000   |
| Target of EGR1 protein 1                                                                                        | TOE1                               | 0,940733772 | 88737000    |
| Acylphosphatase;Acylphosphatase-1                                                                               | FBN3;ACYP1                         | 0,940733772 | 558060000   |
| Dehydrogenase/reductase SDR family member 11                                                                    | DHRS11                             | 0,940645283 | 648970000   |
| Mitochondrial dicarboxylate carrier                                                                             | SLC25A10                           | 0,94055681  | 197500000   |
| Coatomer subunit alpha;Xenin;Proxerin                                                                           | COPA                               | 0,940468353 | 52739000000 |
| mRNA-capping enzyme;Polynucleotide 5-triphosphatase;mRNA guanylyltransferase                                    | RNGTT                              | 0,94029149  | 130880000   |
| Peptidyl-prolyl cis-trans isomerase;Peptidyl-prolyl cis-trans isomerase G                                       | PIIG                               | 0,94029149  | 232180000   |
| Tyrosine--tRNA ligase, cytoplasmic;Tyrosine--tRNA ligase, cytoplasmic, N-terminally processed                   | YARS                               | 0,940203084 | 14339000000 |
|                                                                                                                 |                                    | 0,940114694 | 16295000    |
| Non-specific lipid-transfer protein                                                                             | SCP2                               | 0,940026321 | 1781700000  |
| NHL repeat-containing protein 3                                                                                 | NHLRC3                             | 0,939761301 | 44654000    |
| Ribose-phosphate pyrophosphokinase 1                                                                            | PRPS1                              | 0,939584704 | 36126000000 |
| Protein transport protein Sec61 subunit alpha isoform 1                                                         | SEC61A1                            | 0,939584704 | 22051000000 |
| Phosphoinositide 3-kinase regulatory subunit 4                                                                  | PIK3R4                             | 0,939408173 | 1992000000  |
| TAF6-like RNA polymerase II p300/CBP-associated factor-associated factor 65 kDa subunit 6L                      | TAF6L                              | 0,939319932 | 98371000    |
| Rab GTPase-binding effector protein 1                                                                           | RABEP1                             | 0,939231708 | 125650000   |
| Histone deacetylase 3                                                                                           | HDAC3                              | 0,93905531  | 370530000   |
| Striatin-interacting protein 1                                                                                  | STRIP1;FAM40A                      | 0,93905531  | 146680000   |
| Bifunctional glutamate/proline--tRNA ligase;Glutamate--tRNA ligase;Proline--tRNA ligase                         | EPRS                               | 0,938967136 | 52610000000 |
| Conserved oligomeric Golgi complex subunit 7                                                                    | COG7                               | 0,938878978 | 271470000   |
| Protein lunapark                                                                                                | LNP;KIAA1715                       | 0,938614605 | 386460000   |
| V-type proton ATPase 116 kDa subunit a isoform 1                                                                | DKFZp686N0561;ATP6V0A1             | 0,938526513 | 582020000   |
| Fatty acid-binding protein, epidermal                                                                           | FABP5                              | 0,938262338 | 3180100000  |
|                                                                                                                 |                                    | 0,938086304 | 141700000   |
| Galactokinase                                                                                                   | GALK;GALK1                         | 0,938086304 | 5881600000  |
| Rho-associated protein kinase;Rho-associated protein kinase 1                                                   | ROCK1                              | 0,938086304 | 4182100000  |
| Unconventional myosin-Va                                                                                        | MYO5A                              | 0,937822376 | 868470000   |
| Inositol 1,4,5-trisphosphate receptor type 1                                                                    | ITPR1                              | 0,937734434 | 4469200000  |
| GPI transamidase component PIG-S                                                                                | PIGS                               | 0,937558597 | 1555600000  |
| Sec1 family domain-containing protein 1                                                                         | SCFD1                              | 0,937470704 | 1635300000  |
| GPI-anchor transamidase                                                                                         | PIGK                               | 0,937294967 | 2770400000  |
| RNA polymerase II-associated protein 3                                                                          | RPAP3                              | 0,937294967 | 151930000   |
| Heme oxygenase 2                                                                                                | HMOX2                              | 0,937207123 | 1787100000  |
| ER degradation-enhancing alpha-mannosidase-like protein 2                                                       | EDEM2                              | 0,937119295 | 18965000    |
| Cullin-2                                                                                                        | CUL2                               | 0,937119295 | 34135000000 |
| Frataxin, mitochondrial;Frataxin intermediate form;Frataxin(56-210);Frataxin(78-210);Frataxin mature form       | FXN                                | 0,937031484 | 826860000   |
| Nucleoside diphosphate kinase;Nucleoside diphosphate kinase B;Putative nucleoside diphosphate kinase            | NME1-NME2;NME2;NME1;NME2P1         | 0,937031484 | 1,1435E+11  |
| Moessin                                                                                                         | MSN                                | 0,93694369  | 73602000000 |
| tRNA-splicing ligase RtcB homolog                                                                               | RTCB                               | 0,93694369  | 4229100000  |
| Mitochondrial import inner membrane translocase subunit Tim9                                                    | TIMM9                              | 0,93676815  | 2342300000  |
| C-myc promoter-binding protein                                                                                  | DENNND4A                           | 0,936592676 | 330950000   |
| Glycerol-3-phosphate dehydrogenase 1-like protein                                                               | GPD1L                              | 0,936504963 | 4958000000  |
| Nuclear pore membrane glycoprotein 210                                                                          | NUP210                             | 0,936417268 | 2121500000  |
| Vacuolar protein sorting-associated protein 18 homolog                                                          | VPS18                              | 0,936329588 | 322150000   |
| N-alpha-acetyltransferase 30                                                                                    | NAA30                              | 0,936329588 | 177640000   |
| Acyl-coenzyme A thioesterase 1;Acyl-coenzyme A thioesterase 2, mitochondrial                                    | ACOT1;ACOT2                        | 0,936241925 | 1704700000  |
| Small subunit processome component 20 homolog                                                                   | UTP20                              | 0,936241925 | 362050000   |
| Programmed cell death 6-interacting protein                                                                     | DRIP4;PDCD6IP                      | 0,936154278 | 20511000000 |
| Acyl-CoA desaturase                                                                                             | SCD                                | 0,935979034 | 60696000    |
| Coiled-coil domain-containing protein 127                                                                       | CCDC127                            | 0,935716291 | 386290000   |
| RNA-binding protein 26                                                                                          | RBM26                              | 0,935716291 | 2148600000  |
| Small nuclear ribonucleoprotein Sm D3                                                                           | SNRPD3                             | 0,935628743 | 13264000000 |
| VIP36-like protein                                                                                              | LMAN2L                             | 0,935541211 | 341360000   |
| Probable E3 ubiquitin-protein ligase HECTD4                                                                     | HECTD4                             | 0,935366196 | 518540000   |
| Proteasome activator complex subunit 1                                                                          | PSME1                              | 0,935366196 | 33647000000 |
|                                                                                                                 | DKFZp686I14200                     | 0,935191247 | 478910000   |
| Mitochondrial import inner membrane translocase subunit Tim10                                                   | TIMM10                             | 0,935016363 | 614750000   |
| Volume-regulated anion channel subunit LRRRC8C                                                                  | LRRRC8C                            | 0,934928945 | 65927000    |
| Unconventional myosin-Ic                                                                                        | MYO1C                              | 0,934928945 | 383960000   |
| Cytochrome c1, heme protein, mitochondrial                                                                      | CYC1                               | 0,93475416  | 836510000   |
| GTP cyclohydrolase 1                                                                                            | GCH1                               | 0,934666791 | 1458000000  |
| Actin-related protein 2                                                                                         | ACTR2                              | 0,934579439 | 37165000000 |
| R3H domain-containing protein 1                                                                                 | R3HDM;R3HDM1                       | 0,934579439 | 77833000    |
| Proteasome subunit alpha type-3;Proteasome subunit alpha type                                                   | PSMA3                              | 0,934579439 | 37814000000 |
| Signal recognition particle 19 kDa protein                                                                      | SRP19                              | 0,934579439 | 1346700000  |
| Polyadenylate-binding protein 2                                                                                 | PABPN1                             | 0,934404784 | 6636100000  |
| Endoplasmic reticulum metalloproteinase 1                                                                       | KIAA1815;ERMP1                     | 0,934317481 | 15768000000 |
| Calpain small subunit 1                                                                                         | CAPNS1                             | 0,934317481 | 6756000000  |
| SWI/SNF-related matrix-associated actin-dependent regulator of chromatin subfamily A containing DEAD/H box 1    | SMARCA4                            | 0,934317481 | 41488000    |
| Unconventional myosin-XVIIIa                                                                                    | MYO18A                             | 0,934230194 | 1752900000  |
| Kinesin light chain 2                                                                                           | KLC2                               | 0,934142924 | 706340000   |
| Leucine-rich repeat protein SHOC-2                                                                              | SHOC2                              | 0,934142924 | 313140000   |
| Low molecular weight phosphotyrosine protein phosphatase                                                        | ACP1                               | 0,934142924 | 8752000000  |
| Actin-related protein 3                                                                                         | ACTR3                              | 0,93405567  | 40537000000 |
| Serine/threonine-protein kinase PRP4 homolog                                                                    | PRPF4B                             | 0,93405567  | 386070000   |
| N-acetylglucosamine-6-sulfatase                                                                                 | GNS;DKFZp686E12166                 | 0,933968432 | 146890000   |
| Proteasome subunit alpha type-6;Proteasome subunit alpha type                                                   | PSMA6                              | 0,933968432 | 42919000000 |
| Protein RCC2                                                                                                    | RCC2                               | 0,93388121  | 20663000000 |
| Oligoribonuclease, mitochondrial                                                                                | REXO2                              | 0,933794005 | 3633600000  |
| Delta-1-pyrroline-5-carboxylate dehydrogenase, mitochondrial                                                    | ALDH4A1                            | 0,933619643 | 148280000   |
| Core-binding factor subunit beta                                                                                | CBFB                               | 0,933619643 | 3665700000  |
| Mediator of RNA polymerase II transcription subunit 24                                                          | MED24                              | 0,933532487 | 237160000   |
| Proteasome subunit beta type-4                                                                                  | PSMB4                              | 0,933358223 | 18010000000 |
| Tyrosine-protein kinase BTK                                                                                     | BTK;BTK kinase deficient isoform 2 | 0,933271115 | 4122200000  |
| ATP-binding cassette sub-family D member 3                                                                      | ABCD3                              | 0,933271115 | 573330000   |
| Armadillo repeat-containing protein 6                                                                           | ARMC6                              | 0,933184024 | 183400000   |
| Sorting nexin-12                                                                                                | SNX12                              | 0,933096949 | 1835000000  |
| Proteasome subunit beta type-2;Proteasome subunit beta type                                                     | PSMB2                              | 0,933096949 | 26787000000 |
| WD repeat-containing protein 37                                                                                 | WDR37                              | 0,933096949 | 243040000   |

|                                                                                                                     |                                  |             |             |
|---------------------------------------------------------------------------------------------------------------------|----------------------------------|-------------|-------------|
| Ras-related protein Rab-14                                                                                          | RAB14                            | 0,932661817 | 24679000000 |
| Arf-GAP with Rho-GAP domain, ANK repeat and PH domain-containing protein 3                                          | ARAP3                            | 0,932661817 | 827930000   |
| Ribosomal protein S6 kinase alpha-3                                                                                 | RPS6KA3                          | 0,932574839 | 6214100000  |
| Disco-interacting protein 2 homolog B                                                                               | DIP2B                            | 0,932314003 | 923100000   |
| RNA polymerase II-associated protein 1                                                                              | RPAP1                            | 0,932227091 | 91636000    |
| Mitochondrial import inner membrane translocase subunit Tim13                                                       | TIMM13                           | 0,932140194 | 2052700000  |
| Vesicle-associated membrane protein 7                                                                               | VAMP7                            | 0,932140194 | 2149800000  |
| Apoptotic chromatin condensation inducer in the nucleus                                                             | ACIN1;DKFZp667N107               | 0,932140194 | 923970000   |
| Serine/threonine-protein kinase OSR1                                                                                | OXR1                             | 0,931879601 | 2249800000  |
| Vesicle-trafficking protein SEC22b                                                                                  | SEC22B                           | 0,931879601 | 11947000000 |
| Histone deacetylase 8                                                                                               | HDAC8                            | 0,931792769 | 130810000   |
| Syntaxin-binding protein 5                                                                                          | STXBP5;Nbla04300                 | 0,931705954 | 544370000   |
| Heterogeneous nuclear ribonucleoprotein A3                                                                          | HNRNPA3                          | 0,931619154 | 26513000000 |
| Dedicator of cytokinesis protein 2                                                                                  | DOCK2                            | 0,931532371 | 19484000000 |
| Liprin-alpha-1                                                                                                      | PPFIA1                           | 0,931358853 | 1188000000  |
| Pyridoxal kinase                                                                                                    | PDXK                             | 0,931272118 | 306410000   |
| Magnesium transporter protein 1                                                                                     | MAGT1                            | 0,931185399 | 554340000   |
| Eukaryotic translation initiation factor 4E-binding protein 2                                                       | EIF4EBP2                         | 0,931185399 | 74192000    |
|                                                                                                                     | ZSCAN29                          | 0,931185399 | 379340000   |
|                                                                                                                     | MANF                             | 0,931098696 | 17419000000 |
| Mesencephalic astrocyte-derived neurotrophic factor                                                                 | THADA;GITA/3p fusion;GITA/7p fus | 0,931098696 | 650650000   |
| Thyroid adenoma-associated protein                                                                                  | S100A11                          | 0,93101201  | 2324000000  |
| Protein S100-A11;Protein S100-A11, N-terminally processed;Protein S100                                              | DIS3L2                           | 0,930838686 | 124320000   |
| DIS3-like exonuclease 2                                                                                             | SSR3                             | 0,93057882  | 2979900000  |
| Translocon-associated protein subunit gamma                                                                         | ALDH18A1                         | 0,930319099 | 21447000000 |
| Delta-1-pyrroline-5-carboxylate synthase;Glutamate 5-kinase;Gamma-glutamyl phosphate reductase                      | HGNAT                            | 0,930319099 | 89838000    |
| Heparan-alpha-glucosaminide N-acetyltransferase                                                                     | NAGLU;ufHSD2                     | 0,930146033 | 63750000    |
| Alpha-N-acetylglucosaminidase;Alpha-N-acetylglucosaminidase 82 kDa form;Alpha-N-acetylglucosaminidase 77 kDa form   | ARPC1B                           | 0,930146033 | 26430000000 |
| Actin-related protein 2/3 complex subunit 1B                                                                        | CERS6                            | 0,930059524 | 588580000   |
| Ceramide synthase 6                                                                                                 | CCDC53                           | 0,929886554 | 311100000   |
| WASH complex subunit CCDC53                                                                                         | TLE4;TLE1                        | 0,929800093 | 58025000    |
| Transducin-like enhancer protein 4;Transducin-like enhancer protein 1                                               | EDEM3                            | 0,929713648 | 51184000    |
| ER degradation-enhancing alpha-mannosidase-like protein 3                                                           | ARL6IP5                          | 0,929627219 | 903970000   |
| PRA1 family protein 3                                                                                               | MED14                            | 0,929540807 | 485160000   |
| Mediator of RNA polymerase II transcription subunit 14                                                              | APEH                             | 0,929195317 | 1111200000  |
| Acylamino-acid-releasing enzyme                                                                                     | BCAP31                           | 0,929109894 | 6841100000  |
| B-cell receptor-associated protein 31                                                                               | C14orf1                          | 0,929022668 | 828320000   |
| Probable ergosterol biosynthetic protein 28                                                                         | VPS16                            | 0,928936368 | 435080000   |
| Vacuolar protein sorting-associated protein 16 homolog                                                              | TOP3B                            | 0,928677563 | 81473000    |
| DNA topoisomerase;DNA topoisomerase 3-beta-1                                                                        | TUBA1A                           | 0,928677563 | 3294900000  |
| Tubulin alpha-1A chain                                                                                              | FH                               | 0,928591327 | 8026700000  |
| Fumarate hydratase, mitochondrial                                                                                   | MRPL48                           | 0,928418903 | 628040000   |
| 39S ribosomal protein L48, mitochondrial                                                                            | RAB7A                            | 0,928418903 | 46665000000 |
| Ras-related protein Rab-7a                                                                                          | H6PD                             | 0,928074246 | 190090000   |
| GDH/6PGL endoplasmic bifunctional protein;Glucose 1-dehydrogenase;6-phosphogluconolactonase                         | TRA2A;HSU53209                   | 0,928074246 | 402320000   |
| Transformer-2 protein homolog alpha                                                                                 | YLP1M1;FLJ00353                  | 0,928074246 | 292600000   |
| YLP motif-containing protein 1                                                                                      | ALG5                             | 0,927988122 | 393020000   |
| Dolichyl-phosphate beta-glucosyltransferase                                                                         | SEC11C;SEC11L3                   | 0,927815921 | 996630000   |
| Signal peptidase complex catalytic subunit SEC11C                                                                   | ACBD3                            | 0,927471712 | 114820000   |
| Golgi resident protein GCP60                                                                                        | RARS                             | 0,927471712 | 10334000000 |
| Arginine-tRNA ligase, cytoplasmic                                                                                   | ENTPD5                           | 0,9273857   | 286650000   |
| Ectonucleoside triphosphate diphosphohydrolase 5                                                                    | PLCL2                            | 0,9273857   | 390660000   |
| Inactive phospholipase C-like protein 2;Phosphoinositide phospholipase C                                            | NSDHL                            | 0,927299703 | 1270500000  |
| Sterol-4-alpha-carboxylate 3-dehydrogenase, decarboxylating                                                         | WDR11;DKFZp434L1715              | 0,927213723 | 306500000   |
| WD repeat-containing protein 11                                                                                     | EIF2B5                           | 0,927213723 | 1190200000  |
| Translation initiation factor eIF-2B subunit epsilon                                                                | ARF6                             | 0,927127758 | 4518000000  |
| ADP-ribosylation factor 6                                                                                           | RBM17                            | 0,926955877 | 1077400000  |
| Splicing factor 45                                                                                                  | TBC1D13                          | 0,926698174 | 96263000    |
| TBC1 domain family member 13                                                                                        | TAOK1                            | 0,926612305 | 285310000   |
| Serine/threonine-protein kinase TAO1                                                                                | DNAJC13                          | 0,926354794 | 3976500000  |
| DnaJ homolog subfamily C member 13                                                                                  | UBXN6                            | 0,926354794 | 28540000    |
| UBX domain-containing protein 6                                                                                     | THRAP3                           | 0,926354794 | 2666400000  |
| Thyroid hormone receptor-associated protein 3                                                                       | HEXA                             | 0,926289899 | 96754000    |
| Beta-hexosaminidase;Beta-hexosaminidase subunit alpha                                                               | ATP6V1F                          | 0,926289899 | 1202900000  |
| V-type proton ATPase subunit F                                                                                      | PEPD                             | 0,926183199 | 287860000   |
| Xaa-Pro dipeptidase                                                                                                 | SH3GL1                           | 0,926183199 | 755250000   |
| Endophilin-A2                                                                                                       | ARFGEF1                          | 0,926183199 | 3272100000  |
| Brefeldin A-inhibited guanine nucleotide-exchange protein 1                                                         | TROVE2                           | 0,926097425 | 89114000    |
| 60 kDa SS-A/Ro ribonucleoprotein                                                                                    | RBM8A                            | 0,926097425 | 5137700000  |
| RNA-binding protein 8A                                                                                              | MYO1C                            | 0,926011668 | 149370000   |
|                                                                                                                     | TUBAL3                           | 0,926011668 | 83219000    |
| Tubulin alpha chain-like 3                                                                                          |                                  | 0,925925926 | 2094900000  |
| Cytochrome b-c1 complex subunit Rieske, mitochondrial;Cytochrome b-c1 complex subunit 11;Putative cytochrome b-c1 c | UQCRCF1;UQCRCF1P1                | 0,925925926 | 1096300000  |
| Dual specificity mitogen-activated protein kinase kinase 2                                                          | MAP2K2;DKFZp686L02273            | 0,925668796 | 146050000   |
| Carnitine O-palmitoyltransferase 2, mitochondrial                                                                   | CPT2                             | 0,925668796 | 18966000000 |
| Nucleoside diphosphate kinase A                                                                                     | NME1                             | 0,925583117 | 1012500000  |
| FAS-associated factor 2                                                                                             | FAF2                             | 0,925497455 | 573110000   |
| 39S ribosomal protein L9, mitochondrial                                                                             | MRPL9                            | 0,925497455 | 113410000   |
| Spermatogenesis-defective protein 39 homolog                                                                        | C14orf133;VIPAS39                | 0,925497455 | 3870800000  |
| Engulfment and cell motility protein 1                                                                              | ELMO1                            | 0,925411808 | 422270000   |
| tRNA (uracil-5-)-methyltransferase homolog A                                                                        | TRMT2A                           | 0,925326177 | 52821000    |
| Neurogenic locus notch homolog protein 2;Notch 2 extracellular truncation;Notch 2 intracellular domain              | NOTCH2                           | 0,925326177 | 142060000   |
| Pantothenate kinase 2, mitochondrial                                                                                | PANK2;hCG_39342                  | 0,925240563 | 3346800000  |
|                                                                                                                     | BRL                              | 0,925240563 | 91933000    |
| Ubiquitin carboxyl-terminal hydrolase BAP1                                                                          | BAP1                             | 0,925154963 | 73134000000 |
| 60 kDa heat shock protein, mitochondrial                                                                            | HSPD1                            | 0,92506938  | 571710000   |
| Serine/threonine-protein phosphatase;Serine/threonine-protein phosphatase 2A catalytic subunit beta isoform         | PPP2CB                           | 0,924983813 | 9373600000  |
| Sideroflexin-3                                                                                                      | SFXN3                            | 0,924983813 | 2267200000  |
| B-cell receptor-associated protein 29                                                                               | BCAP29                           | 0,924983813 | 538390000   |
| Protein transport protein Sec16A                                                                                    | SEC16A                           | 0,924812725 | 307840000   |
| Cleft lip and palate transmembrane protein 1-like protein                                                           | CLPTM1L                          | 0,924812725 | 504730000   |
| Small nuclear ribonucleoprotein F                                                                                   | SNRPF                            | 0,924727205 | 4956000000  |
| Ubiquinone biosynthesis monooxygenase COQ6                                                                          | COQ6                             | 0,924556213 | 131890000   |
| Endoplasmic                                                                                                         | TRA1;HSP90B1                     | 0,924470741 | 1,1437E+11  |
| Mitochondrial ornithine transporter 1                                                                               | SLC25A15                         | 0,924043615 | 122440000   |
| N-lysine methyltransferase SMYD2                                                                                    | SMYD2                            | 0,923958237 | 52460000    |
| ER lumen protein-retaining receptor 2                                                                               | KDELR2                           | 0,923958237 | 3465900000  |
| BET1 homolog                                                                                                        | BET1;DKFZp781C0425               | 0,923872875 | 504730000   |
| cAMP-dependent protein kinase catalytic subunit beta                                                                | PRKACB                           | 0,923872875 | 713210000   |
| Isoleucine-tRNA ligase, mitochondrial                                                                               | IARS2                            | 0,923702198 | 1211300000  |
| WD repeat-containing protein 91                                                                                     | WDR91                            | 0,923531585 | 54573000    |
| Uncharacterized protein C17orf62                                                                                    | C17orf62                         | 0,923446302 | 44918000    |
| Transcription factor Dp-1                                                                                           | TFDP1                            | 0,923446302 | 379860000   |
| Tyrosine-protein kinase receptor;Kinesin-1 heavy chain                                                              | KIF5B-RET(NM_020630)_K23;R12;    | 0,922934933 | 12469000000 |
| Sequestosome-1                                                                                                      | SQSTM1;OSIL                      | 0,922934933 | 1880300000  |
|                                                                                                                     |                                  | 0,922679461 | 821830000   |
| Hypoxia up-regulated protein 1                                                                                      | HYOU1                            | 0,922594335 | 33434000000 |
| Trimethylguanosine synthase                                                                                         | TGS1                             | 0,922339052 | 82172000    |
| Proteasome subunit beta type;Proteasome subunit beta type-1                                                         | PSMB1                            | 0,921998894 | 25975000000 |

|                                                                                                          |                               |             |             |
|----------------------------------------------------------------------------------------------------------|-------------------------------|-------------|-------------|
| Aldo-keto reductase family 1 member B15                                                                  | LOC402299;AKR1B15             | 0,921913893 | 664530000   |
| Mitochondrial import receptor subunit TOM20 homolog                                                      | TOMM20                        | 0,92174394  | 685130000   |
| Hsc70-interacting protein;Putative protein FAM10A5;Putative protein FAM10A4                              | ST13;ST13P5;ST13P4;hCG_19906; | 0,92174394  | 17699000000 |
| ATPase family AAA domain-containing protein 1                                                            | ATAD1                         | 0,921658986 | 7324400000  |
| 39S ribosomal protein L39, mitochondrial                                                                 | EEF1A1                        | 0,921149595 | 141190000   |
| Tuberin                                                                                                  | MRPL39                        | 0,921064751 | 410520000   |
| Ras-related protein Rab-22A                                                                              | TSC2                          | 0,921064751 | 27283000    |
| Probable 28S rRNA (cytosine(4447)-C(5))-methyltransferase                                                | RAB22A                        | 0,920979923 | 663710000   |
| Regulation of nuclear pre-mRNA domain-containing protein 1A                                              | NOP2                          | 0,920979923 | 199600000   |
| Eukaryotic translation elongation factor 1 epsilon-1                                                     | RPRD1A                        | 0,920979923 | 442970000   |
| Inositol hexakisphosphate and diphosphoinositol-pentakisphosphate kinase 2                               | EEF1E1;EEF1E1-BLOC1S5         | 0,920979923 | 29743000000 |
| Retinol dehydrogenase 11                                                                                 | PPIP5K2                       | 0,920810313 | 525950000   |
| Enhancer of rudimentary homolog                                                                          | RDH11                         | 0,920725532 | 1024300000  |
| Tetrapeptide repeat protein 1                                                                            | ERH                           | 0,920640766 | 3475400000  |
| AP-3 complex subunit delta-1                                                                             | TTC1                          | 0,920471281 | 1105900000  |
| Tyrosine--tRNA ligase, mitochondrial                                                                     | AP3D1                         | 0,920301859 | 3078500000  |
| NADH dehydrogenase [ubiquinone] 1 beta subcomplex subunit 3                                              | YARS2                         | 0,920217171 | 555780000   |
| Nucleolar and coiled-body phosphoprotein 1                                                               | NDUFB3                        | 0,920217171 | 132010000   |
| Annexin A2;Annexin;Putative annexin A2-like protein                                                      | NOLC1                         | 0,920047842 | 266080000   |
| Vacuolar protein sorting-associated protein 41 homolog                                                   | ANXA2;ANXA2P2                 | 0,920047842 | 96228000    |
| AMP deaminase 2                                                                                          | HVPS41;VPS41                  | 0,919963201 | 68820000000 |
| Ubiquinol-cytochrome-c reductase complex assembly factor 2                                               | AMPD2                         | 0,919793966 | 308630000   |
| Vacuolar protein-sorting-associated protein 36                                                           | UQC22                         | 0,91954023  | 2647400000  |
| Chromatin assembly factor 1 subunit B                                                                    | VPS36                         | 0,91954023  | 44630000    |
| Syntaxin-12                                                                                              | CHAF1B                        | 0,919202133 | 3241600000  |
| Transmembrane emp24 domain-containing protein 4                                                          | STX12                         | 0,919202133 | 632470000   |
| Tripartite motif-containing protein 16-like protein;Tripartite motif-containing protein 16               | TMED4                         | 0,918864284 | 800090000   |
| Thioredoxin-dependent peroxidase reductase, mitochondrial                                                | TRIM16;TRIM16L                | 0,918864284 | 1979200000  |
| AP-2 complex subunit sigma                                                                               | PRDX3                         | 0,918695452 | 500570000   |
| Phosphatidylinositol phosphate SAC1                                                                      | AP2S1                         | 0,91861106  | 18040000000 |
| H/ACA ribonucleoprotein complex non-core subunit NAF1                                                    | SACM1L                        | 0,918357976 | 1455100000  |
| Polyadenylate-binding protein-interacting protein 1                                                      | NAF1                          | 0,918273646 | 1658400000  |
| FYN-binding protein                                                                                      | PAIP1                         | 0,918273646 | 127280000   |
| Syntaxin-17                                                                                              | FYB                           | 0,918189331 | 1471000000  |
| ATP synthase subunit beta, mitochondrial;ATP synthase subunit beta                                       | STX17;DKFZp762D1813           | 0,918189331 | 222090000   |
| V-type proton ATPase subunit E 1                                                                         | ATP5B                         | 0,918189331 | 286730000   |
| YEATS domain-containing protein 4                                                                        | ATP6V1E1                      | 0,918020747 | 295250000   |
| Protein NipSnap homolog 3A;Protein NipSnap homolog 3B                                                    | YEATS4                        | 0,917852226 | 1,6696E+11  |
| Glycerinaldehyde-3-phosphate dehydrogenase                                                               | NIPSNAP3A;NIPSNAP3B           | 0,917767988 | 6140600000  |
| NADH-ubiquinone oxidoreductase chain 1                                                                   | GAPDH                         | 0,91759956  | 63198000    |
| Polypeptide N-acetylglucosaminyltransferase 1;Polypeptide N-acetylglucosaminyltransferase 1 soluble form | NADH1;nd1;ND1;ndh1;ROPN1B;M1  | 0,91759956  | 296760000   |
| Paraspeckle component 1                                                                                  | GALNT1                        | 0,917178758 | 3,2685E+11  |
| UPF0568 protein C14orf166                                                                                | PSPC1                         | 0,917178758 | 106960000   |
| Cytochrome b-c1 complex subunit 8                                                                        | C14orf166                     | 0,916842395 | 198510000   |
| Spliceosome RNA helicase DDX39B                                                                          | UQC22                         | 0,916674306 | 2687400000  |
| Triple functional domain protein                                                                         | DDX39B;hCG_2005638            | 0,916674306 | 7803600000  |
| Plasma membrane calcium-transporting ATPase 1;Calcium-transporting ATPase                                | TRIO                          | 0,916254352 | 429230000   |
| Eukaryotic initiation factor 4A-II                                                                       | ATP2B1                        | 0,916254352 | 48970000000 |
| Hepatoma-derived growth factor-related protein 2;Hepatoma-derived growth factor-related protein 3        | EIF4A2                        | 0,916086479 | 13099000    |
| CDK5 regulatory subunit-associated protein 3                                                             | HDGFRP2;HDGFRP3               | 0,916002565 | 2869900000  |
| Cytosol aminopeptidase                                                                                   | CDK5RAP3                      | 0,915834783 | 1018300000  |
| Pre-mRNA-processing factor 40 homolog A                                                                  | LAP3                          | 0,915834783 | 20930000    |
| Protein FAM107B                                                                                          | PRPF40A                       | 0,915667063 | 117070000   |
| Calcium-transporting ATPase;Sarcoplasmic/endoplasmic reticulum calcium ATPase 3                          | FAM107B                       | 0,915667063 | 4410700000  |
| WD repeat and FYVE domain-containing protein 3                                                           | ATP2A3                        | 0,915583227 | 2709000000  |
| Vacuolar protein sorting-associated protein 13C                                                          | WDFY3                         | 0,915415599 | 2481800000  |
| RAD50-interacting protein 1                                                                              | VPS13C                        | 0,915415599 | 3142200000  |
| 7-methylguanosine phosphate-specific 5-nucleotidase                                                      | RINT1                         | 0,915248032 | 60353000    |
| Cytoplasmic dynein 2 heavy chain 1                                                                       | NTSC3B                        | 0,915080527 | 4611800000  |
| GRB2-related adapter protein                                                                             | DYNC2H1                       | 0,914913083 | 62451000    |
| V-type proton ATPase catalytic subunit A                                                                 | GRAP                          | 0,914829384 | 1437900000  |
| Growth factor receptor-bound protein 2                                                                   | ATP6V1A                       | 0,914829384 | 451980000   |
| Protein DJ-1                                                                                             | GRB2                          | 0,914829384 | 20024000    |
| ATP-dependent RNA helicase DDX50                                                                         | PARK7                         | 0,914745701 | 6768600000  |
| Legumain                                                                                                 | mcdhr;DDX50;DKFZp761E0323     | 0,914745701 | 10249000000 |
| Proteasome subunit beta type-3                                                                           | LGMIN                         | 0,914662032 | 25190000000 |
| Uracil phosphoribosyltransferase homolog                                                                 | PSMB3                         | 0,914494742 | 64210000    |
| 3-5 exoribonuclease 1                                                                                    | UPRT;RP11-311P8.3             | 0,914494742 | 451190000   |
| Small nuclear ribonucleoprotein Sm D2                                                                    | ERI1                          | 0,914411119 | 19363000000 |
| Interferon-induced 35 kDa protein                                                                        | SNRPD2                        | 0,914327512 | 341670000   |
| Transmembrane emp24 domain-containing protein 10                                                         | IFI35                         | 0,914327512 | 262040000   |
| Actin-related protein 2/3 complex subunit 5                                                              | TMED10                        | 0,914327512 | 12985000000 |
| Fatty acyl-CoA reductase 1                                                                               | ARPC5                         | 0,913909706 | 128620000   |
| CD44 antigen                                                                                             | FAR1                          | 0,913909706 | 13220000000 |
| Aspartate aminotransferase;Aspartate aminotransferase, cytoplasmic                                       | CD44                          | 0,91382619  | 9324200000  |
| U1 small nuclear ribonucleoprotein 70 kDa                                                                | GIG18;GOT1                    | 0,91374269  | 1050900000  |
| TBC1 domain family member 23                                                                             | SNRP70                        | 0,912908527 | 28894000    |
| RNA-binding protein 14                                                                                   | TBC1D23                       | 0,912825194 | 31190000000 |
| cTAGE family member 5                                                                                    | RBM14                         | 0,912658574 | 3525600000  |
| Protein NRDE2 homolog                                                                                    | CTAGE5                        | 0,912492016 | 129540000   |
| Fas apoptotic inhibitory molecule 1                                                                      | C14orf102;NRDE2               | 0,911909539 | 22111000    |
| Epidermal growth factor receptor kinase substrate 8-like protein 2                                       | FAIM                          | 0,911826388 | 369310000   |
| Translocating chain-associated membrane protein;Translocating chain-associated membrane protein 1        | EPS8L2                        | 0,911826388 | 606620000   |
| Signal transducer and activator of transcription;Signal transducer and activator of transcription 2      | TRAM1                         | 0,911660133 | 1024800000  |
| Mitochondrial carrier homolog 2                                                                          | STAT2;DKFZp686H05229          | 0,911577028 | 45099000    |
| MLN64 N-terminal domain homolog                                                                          | MTCH2                         | 0,911577028 | 673490000   |
| Activating signal cointegrator 1 complex subunit 3                                                       | STARD3NL                      | 0,911577028 | 1414560000  |
| Pterin-4-alpha-carbinolamine dehydratase 2                                                               | ASCC3                         | 0,911493939 | 4145600000  |
| GEM-interacting protein                                                                                  | PCBD2                         | 0,91140864  | 5985200000  |
| Tropomyosin alpha-3 chain                                                                                | GMIIP                         | 0,91124476  | 55900000    |
| Utrophin                                                                                                 | TPM3;HEL-S-82p                | 0,911078717 | 3186200000  |
| Protein-arginine deiminase type-3;Protein-arginine deiminase type-4                                      | UTRN                          | 0,911078717 | 83978000    |
| Ras-related protein Rab-5C                                                                               | PADI3;PADI4                   | 0,911078717 | 682790000   |
| Kinesin-like protein KIF11                                                                               | RAB5C                         | 0,910995718 | 908200000   |
| Oxysterol-binding protein-related protein 11                                                             | KIF11                         | 0,91078717  | 259930000   |
| 2-oxoisovalerate dehydrogenase subunit alpha, mitochondrial                                              | OSBPL11                       | 0,910415149 | 503190000   |
| Tryptophan--tRNA ligase, cytoplasmic;T1-TrpRS;T2-TrpRS                                                   | BCKDHA                        | 0,910332271 | 90149000000 |
| Membrane-associated progesterone receptor component 2                                                    | WARS                          | 0,910249408 | 14549000000 |
| Septin-1                                                                                                 | PGRMC2                        | 0,910083728 | 133020000   |
| ADP-ribosylation factor-like protein 8B                                                                  | ARL8B                         | 0,909918107 | 516220000   |
| Sperm-specific antigen 2                                                                                 | SSFA2                         | 0,90966979  | 9984000000  |
| Zinc transporter SLC39A7                                                                                 | SLC39A7                       | 0,90966979  | 1615000000  |
| Vesicle-associated membrane protein 4                                                                    | VAMP4                         | 0,909090909 | 5104000000  |
| General transcription factor 3C polypeptide 3                                                            | GTF3C3                        | 0,908677874 | 9745000000  |
| Anaphase-promoting complex subunit 5                                                                     | ANAPC5                        | 0,908430233 | 89310000    |
|                                                                                                          |                               | 0,908347716 | 189160000   |
|                                                                                                          |                               | 0,908100254 | 490720000   |
|                                                                                                          |                               | 0,908100254 | 82514000    |
|                                                                                                          |                               | 0,908017797 | 277380000   |

|                                                                                                                              |                             |             |             |
|------------------------------------------------------------------------------------------------------------------------------|-----------------------------|-------------|-------------|
| Transmembrane 9 superfamily member 4                                                                                         | TM9SF4                      | 0,907852928 | 703390000   |
| Phosphatidylethanolamine-binding protein 1;Hippocampal cholinergic neurostimulating peptide                                  | PEBP1                       | 0,907523369 | 10853000000 |
| Polymerase delta-interacting protein 2                                                                                       | POLDIP2                     | 0,907441016 | 1062020000  |
| NADH dehydrogenase [ubiquinone] flavoprotein 2, mitochondrial                                                                | NDUFV2                      | 0,907358679 | 1603200000  |
| Vasodilator-stimulated phosphoprotein                                                                                        | VASP                        | 0,907276356 | 4055300000  |
| Cyclin-Y;Cyclin-Y-like protein 1;Cyclin-Y-like protein 2                                                                     | CCNY;CCNYL1;CCNYL2          | 0,907194049 | 220610000   |
| Bifunctional polynucleotide phosphatase/kinase;Polynucleotide 3-phosphatase;Polynucleotide 5-hydroxyl-kinase                 | PNKP                        | 0,906700517 | 88706000    |
| Ras-related protein Rab-10                                                                                                   | RAB10                       | 0,906618314 | 11280000000 |
| RNA-binding protein PNO1                                                                                                     | PNO1                        | 0,906618314 | 839280000   |
| Protein sel-1 homolog 1                                                                                                      | SEL1L                       | 0,90628965  | 1358600000  |
| Septin-6                                                                                                                     |                             | 0,906207522 | 1343000000  |
| ADP-ribosylation factor-like protein 15                                                                                      | ARL15                       | 0,905961225 | 47053000    |
| Histidine triad nucleotide-binding protein 2, mitochondrial                                                                  | HINT2                       | 0,905797101 | 520580000   |
| E3 ubiquitin-protein ligase TRIM23                                                                                           | TRIM23                      | 0,905797101 | 771260000   |
|                                                                                                                              |                             | 0,905715062 | 32072000    |
| Ras association domain-containing protein 2                                                                                  | RASSF2                      | 0,905715062 | 911540000   |
| Transmembrane emp24 domain-containing protein 2                                                                              | RNP24;TMED2                 | 0,905551028 | 8177500000  |
| Gephyrin;Molybdopterin adenyltransferase;Molybdopterin molybdenumtransferase                                                 | GPHN;GPHRYN                 | 0,905551028 | 3403200000  |
| Unconventional myosin-IXb                                                                                                    | MYO9B variant protein;MYO9B | 0,905141202 | 657790000   |
| N-terminal Xaa-Pro-Lys N-methyltransferase 1;N-terminal Xaa-Pro-Lys N-methyltransferase 1, N-terminally processed            | NTMT1                       | 0,905059281 | 584590000   |
| Apoptosis regulator BAX                                                                                                      | BAX                         | 0,904895485 | 7495300000  |
| Actin, cytoplasmic 1;Actin, cytoplasmic 1, N-terminally processed                                                            | PS1TP5BP1;ACTB              | 0,904731747 | 26299000000 |
| Small nuclear ribonucleoprotein-associated protein;Small nuclear ribonucleoprotein-associated proteins B and B;Small nuclear | SNRPN;SNRPB                 | 0,9046499   | 21384000000 |
| CCR4-NOT transcription complex subunit 7                                                                                     | CNOT7                       | 0,904486252 | 481660000   |
| 5-3 exoribonuclease 2                                                                                                        | XRN2                        | 0,904404445 | 2533300000  |
| Fragile X mental retardation syndrome-related protein 2                                                                      | FXR2                        | 0,904322662 | 512610000   |
| Proto-oncogene vav                                                                                                           | VAV1                        | 0,904077389 | 909020000   |
| Calcium-binding mitochondrial carrier protein Aralar2                                                                        | SLC25A13                    | 0,903587241 | 2577500000  |
| Unconventional myosin-1c                                                                                                     | MYO1C                       | 0,903587241 | 3749800000  |
| Lipopolysaccharide-responsive and beige-like anchor protein                                                                  | LRBA                        | 0,903505602 | 1875300000  |
| Actin-related protein 2/3 complex subunit 2                                                                                  | ARPC2                       | 0,903423977 | 3757800000  |
| Mitotic spindle-associated MMXD complex subunit MIP18                                                                        | FAM96B                      | 0,903423977 | 763880000   |
| E3 ubiquitin-protein ligase synoviolin                                                                                       | SYVN1;FLJ00221              | 0,903260771 | 324660000   |
| Serine/threonine-protein kinase mTOR                                                                                         | MTOR                        | 0,903179191 | 2178500000  |
| Coiled-coil domain-containing protein 22                                                                                     | CCDC22                      | 0,903097625 | 422650000   |
| Transmembrane emp24 domain-containing protein 9                                                                              | TMED9                       | 0,903016074 | 13288000000 |
| DNA-binding protein SMUBP-2                                                                                                  | IGHMBP2                     | 0,903016074 | 152000000   |
| [Pyruvate dehydrogenase [acetyl-transferring]]-phosphatase 2, mitochondrial                                                  | PDF2                        | 0,902934537 | 14713000    |
| U1 small nuclear ribonucleoprotein C                                                                                         | SNRPC                       | 0,902608539 | 999150000   |
| N-acetylgalactosamine kinase                                                                                                 | GALK2                       | 0,902445628 | 563130000   |
|                                                                                                                              | FLJ44955                    | 0,902445628 | 61193000    |
|                                                                                                                              | UNC13D                      | 0,902445628 | 920730000   |
| Protein unc-13 homolog D                                                                                                     | AGL                         | 0,902282775 | 672640000   |
| Glycogen debranching enzyme;4-alpha-glucanotransferase;Amylo-alpha-1,6-glucosidase                                           | PARG                        | 0,902119982 | 98561000    |
| Poly(ADP-ribose) glycohydrolase                                                                                              | AP3S1                       | 0,902038607 | 53996000    |
| UNC119-binding protein C5orf30                                                                                               | C5orf30                     | 0,902038607 | 53996000    |
| Dolichyl-diphosphooligosaccharide--protein glycosyltransferase subunit DAD1                                                  | DAD1                        | 0,901957247 | 8363600000  |
| 3-hydroxyacyl-CoA dehydrogenase type-2                                                                                       | HSD17B10                    | 0,901957247 | 5345900000  |
| Slit homolog 2 protein;Slit homolog 2 protein N-product;Slit homolog 2 protein C-product                                     | SLIT2                       | 0,901794571 | 1527000000  |
| Rho GDP-dissociation inhibitor 2                                                                                             | ARHGDI2                     | 0,901550667 | 20584000000 |
| WD repeat- and FYVE domain-containing protein 4                                                                              | hCG_1745555;WDFY4           | 0,901306895 | 770550000   |
| Ras-related protein Rab-2A                                                                                                   | RAB2A                       | 0,901225667 | 16637000000 |
| Signal peptidase complex subunit 2                                                                                           | SPCS2                       | 0,901225667 | 11434000000 |
| Pre-mRNA 3'-end-processing factor FIP1                                                                                       | FIP1L1                      | 0,901225667 | 337910000   |
| Inactive hydroxysteroid dehydrogenase-like protein 1                                                                         | HDLL1                       | 0,901063255 | 397210000   |
| Alpha-mannosidase 2C1                                                                                                        | MAN2C1                      | 0,901063255 | 415840000   |
| GON-4-like protein                                                                                                           | GON4L                       | 0,90098207  | 826890000   |
| Tubulin-specific chaperone D                                                                                                 | TBCD                        | 0,900576369 | 1082300000  |
| AP-3 complex subunit sigma-1                                                                                                 | AP3S1                       | 0,900576369 | 1535000000  |
|                                                                                                                              | TUBB6                       | 0,900414191 | 1663900000  |
|                                                                                                                              | AK3                         | 0,900333123 | 7690500000  |
| GTP:AMP phosphotransferase AK3, mitochondrial                                                                                | UQCRC2                      | 0,900252071 | 6517100000  |
| Cytochrome b-c1 complex subunit 2, mitochondrial                                                                             | DNM1L                       | 0,900171032 | 6971300000  |
| Dynamin-1-like protein                                                                                                       | SAP18                       | 0,900171032 | 397810000   |
| Histone deacetylase complex subunit SAP18                                                                                    | SND1                        | 0,900090009 | 22049000000 |
| Staphylococcal nuclease domain-containing protein 1                                                                          | RMND5A                      | 0,900009    | 229920000   |
| Protein RMD5 homolog A                                                                                                       | N4BP2                       | 0,899928006 | 85481000    |
| NEDD4-binding protein 2                                                                                                      | RCL1                        | 0,899766061 | 74280000    |
| RNA 3-terminal phosphate cyclase-like protein                                                                                | SNRPD1                      | 0,899442346 | 9115100000  |
| Small nuclear ribonucleoprotein Sm D1                                                                                        | PTRH2                       | 0,899361453 | 1110600000  |
| Peptidyl-tRNA hydrolase 2, mitochondrial                                                                                     | STT3B                       | 0,899118864 | 973960000   |
| Dolichyl-diphosphooligosaccharide--protein glycosyltransferase subunit STT3B                                                 | CDK13                       | 0,899038029 | 58407000    |
| Cyclin-dependent kinase 13                                                                                                   | VPS39                       | 0,89895721  | 568630000   |
| Vam6/Vps39-like protein                                                                                                      | JAGN1                       | 0,898714838 | 1516800000  |
| Protein jagunal homolog 1                                                                                                    | HDCC2                       | 0,898714838 | 43152000    |
| HD domain-containing protein 2                                                                                               | EXOC8                       | 0,898634076 | 190520000   |
| Exocyst complex component 8                                                                                                  | GVINP1                      | 0,898553329 | 70915000    |
| Interferon-induced very large GTPase 1                                                                                       | BRK1                        | 0,898472597 | 249960000   |
| Protein BRICK1                                                                                                               | HSPE1-MOB4;MOB4             | 0,898069151 | 19837000000 |
| MOB-like protein phocain                                                                                                     | FKBP2                       | 0,898069151 | 556970000   |
| Peptidyl-prolyl cis-trans isomerase;Peptidyl-prolyl cis-trans isomerase FKBP2                                                | NT5C3A                      | 0,898069151 | 11879000000 |
| Cytosolic 5-nucleotidase 3A                                                                                                  | RDH13                       | 0,898069151 | 230170000   |
| Retinol dehydrogenase 13                                                                                                     | ATP5A1                      | 0,897907875 | 1,5628E+11  |
| ATP synthase subunit alpha, mitochondrial                                                                                    | RABL6                       | 0,897907875 | 183680000   |
| Rab-like protein 6                                                                                                           | HSPA5                       | 0,897907875 | 2,089E+11   |
| 78 kDa glucose-regulated protein                                                                                             | ZNF638                      | 0,897907875 | 67631000    |
| Zinc finger protein 638                                                                                                      | EIF4E3                      | 0,897827258 | 387560000   |
| Eukaryotic translation initiation factor 4E type 3                                                                           | VAPA                        | 0,897827258 | 14511000000 |
| Vesicle-associated membrane protein-associated protein A                                                                     | MRPL22                      | 0,897585495 | 545260000   |
| 39S ribosomal protein L22, mitochondrial                                                                                     | YS1                         | 0,897504936 | 2454700000  |
| Glycogen [starch] synthase, muscle                                                                                           | YME1L1;FTSH                 | 0,897424392 | 337830000   |
| ATP-dependent zinc metalloprotease YME1L1                                                                                    | ARF4                        | 0,897424392 | 1591200000  |
| ADP-ribosylation factor 4                                                                                                    | DHCR24;Nbla03646            | 0,897263347 | 553650000   |
| Delta(24)-sterol reductase                                                                                                   | CALU                        | 0,897263347 | 409900000   |
| Calumenin                                                                                                                    | MON1A                       | 0,897182846 | 281540000   |
| Vacuolar fusion protein MON1 homolog A                                                                                       | CAPN2                       | 0,895977063 | 1732000000  |
| Calpain-2 catalytic subunit                                                                                                  | MOV10                       | 0,895896793 | 321170000   |
| Putative helicase MOV-10                                                                                                     | NAT10                       | 0,895656068 | 175320000   |
| N-acetyltransferase 10                                                                                                       | TOMM70A                     | 0,895255148 | 4554000000  |
| Mitochondrial import receptor subunit TOM70                                                                                  | ABCC1;DKFZp781G125;MRP      | 0,89509488  | 12102000000 |
| Multidrug resistance-associated protein 1                                                                                    | C11orf73                    | 0,895014768 | 488470000   |
| Protein Hikeshi                                                                                                              | OS9;OR7D2                   | 0,894774517 | 91863000    |
| Protein OS-9                                                                                                                 | FACLA;ACSL4                 | 0,894774517 | 1408900000  |
| Long-chain-fatty-acid--CoA ligase 4                                                                                          | PPP1R7                      | 0,894694462 | 6725700000  |
| Protein phosphatase 1 regulatory subunit 7                                                                                   | MAN1A2                      | 0,894454383 | 109470000   |
| Mannosyl-oligosaccharide 1,2-alpha-mannosidase IB                                                                            | FNDC3A                      | 0,894374385 | 337950000   |
| Fibronectin type-III domain-containing protein 3A                                                                            | ATP5O                       | 0,894294402 | 6729700000  |
| ATP synthase subunit O, mitochondrial                                                                                        | C12orf10;MST024             | 0,894214433 | 2861400000  |
| UPF0160 protein MYG1, mitochondrial                                                                                          | BRD1;DKFZp434B094           | 0,894214433 | 272230000   |
| Bromodomain-containing protein 1                                                                                             |                             |             |             |

|                                                                                                                   |                                 |             |             |
|-------------------------------------------------------------------------------------------------------------------|---------------------------------|-------------|-------------|
| Neuroblastoma-amplified sequence                                                                                  | NBAS                            | 0,894134478 | 288590000   |
| RWD domain-containing protein 1                                                                                   | RWDD1                           | 0,893974611 | 463500000   |
| Cytochrome P450 20A1                                                                                              | CYP20A1                         | 0,893894699 | 866800000   |
| Hydroxymethylglutaryl-CoA lyase, mitochondrial;3-hydroxymethyl-3-methylglutaryl-CoA lyase, cytoplasmic            | HMGCL;HMGCLL1;DKFZp434G14       | 0,893734918 | 534110000   |
| Tyrosine-protein phosphatase non-receptor type;Tyrosine-protein phosphatase non-receptor type 6                   | PTPN6                           | 0,893734918 | 298650000   |
| ATP-binding cassette sub-family B member 7, mitochondrial                                                         | ABCB7                           | 0,893655049 | 1186100000  |
| Endoribonuclease Dicer                                                                                            | DICER1                          | 0,893575194 | 164260000   |
| DNA-directed RNA polymerase III subunit RPC1;DNA-directed RNA polymerase                                          | POLR3A                          | 0,893495354 | 427230000   |
| GPI ethanolamine phosphate transferase 3                                                                          | PIGO                            | 0,893495354 | 57856000    |
| Vacuole membrane protein 1                                                                                        | TMEM49;VMP1                     | 0,893335716 | 189370000   |
| Mitochondrial carnitine/acylcarnitine carrier protein                                                             | SLC25A20                        | 0,893255918 | 1668000000  |
| Vacuolar protein sorting-associated protein 33B                                                                   | VPS33B                          | 0,893255918 | 564970000   |
| ATP-dependent RNA helicase A                                                                                      | DHX9                            | 0,893176134 | 8256000000  |
| Citrate synthase;Citrate synthase, mitochondrial                                                                  | CS                              | 0,893016661 | 26902000000 |
| 1-phosphatidylinositol 4,5-bisphosphate phosphodiesterase beta-3                                                  | PLCB3                           | 0,892697733 | 1810500000  |
| Dynamin-2                                                                                                         | DNM2                            | 0,892538379 | 10014000000 |
| Synaptosomal-associated protein;Synaptosomal-associated protein 29                                                | SNAP29                          | 0,892538379 | 269040000   |
| Calcium-binding mitochondrial carrier protein Aralar1                                                             | SLC25A12                        | 0,892379083 | 7514100000  |
| Gamma-soluble NSF attachment protein                                                                              | NAPG                            | 0,892379083 | 2767500000  |
| Succinyl-CoA ligase [ADP-forming] subunit beta, mitochondrial                                                     | SUCLA2;DKFZp686D0880;DKFZp5     | 0,892299456 | 3066300000  |
| Bcl-2-like protein 1                                                                                              | BCL2L1                          | 0,892299456 | 1388300000  |
| Acyl-protein thioesterase 2                                                                                       | LYPLA2                          | 0,892299456 | 6259400000  |
| 60S ribosome subunit biogenesis protein NIP7 homolog                                                              | NIP7                            | 0,892140244 | 944570000   |
| cAMP-dependent protein kinase catalytic subunit alpha                                                             | PRKACA                          | 0,892140244 | 8924600000  |
| Mitogen-activated protein kinase 12                                                                               | MAPK12;DKFZp686M02159           | 0,892140244 | 2122400000  |
| Neudesin                                                                                                          | CREBBP                          | 0,891901534 | 542960000   |
| Membrane-associated progesterone receptor component 1                                                             | NENF                            | 0,891821992 | 230420000   |
| Barrier-to-autointegration factor;Barrier-to-autointegration factor, N-terminally processed                       | PGRMC1                          | 0,891742465 | 4576000000  |
| HEAT repeat-containing protein 3                                                                                  | BANF1                           | 0,891583452 | 5895000000  |
| GTP-binding protein SAR1b                                                                                         | HEATR3                          | 0,891503967 | 555990000   |
| Fructose-bisphosphate aldolase C                                                                                  | SAR1B;DKFZp434B2017             | 0,891424496 | 11617000000 |
| Hypoxanthine-guanine phosphoribosyltransferase                                                                    | ALDOC                           | 0,891424496 | 21589000000 |
| FUN14 domain-containing protein 2                                                                                 | HPRT1                           | 0,891186169 | 29595000000 |
| Serine/threonine-protein kinase A-Raf                                                                             | FUNDC2                          | 0,890709896 | 1015700000  |
| Selenocysteine lyase                                                                                              | ARAF                            | 0,890709896 | 187850000   |
| ATP-dependent RNA helicase DDX1                                                                                   | SCLY                            | 0,890551251 | 433570000   |
| NADH dehydrogenase [ubiquinone] 1 alpha subcomplex subunit 8                                                      | DDX1                            | 0,89047195  | 9823500000  |
| Echinoderm microtubule-associated protein-like 4;Tyrosine-protein kinase receptor                                 | NDUFA8                          | 0,890392663 | 1517800000  |
| Phosphatidylinositol 4,5-bisphosphate 3-kinase catalytic subunit delta isoform                                    | EML4;EML4-ALK variant 6;EML4-AL | 0,89031339  | 2200300000  |
| Protein THEM6                                                                                                     | PIK3CD                          | 0,890154887 | 1202600000  |
| MMS19 nucleotide excision repair protein homolog                                                                  | THEM6                           | 0,890075656 | 2244900000  |
| Aminopeptidase B                                                                                                  | MMS19                           | 0,889838049 | 2134900000  |
| U7 snRNA-associated Sm-like protein LSm11                                                                         | RNPEP                           | 0,889636216 | 1082700000  |
| Dolichol-phosphate mannosyltransferase subunit 1                                                                  | LSM11                           | 0,889284126 | 122940000   |
| Neurofibromin;Neurofibromin truncated                                                                             | DPM1                            | 0,889046942 | 4759900000  |
| Ras-related C3 botulinum toxin substrate 2                                                                        | NF1                             | 0,888967908 | 762180000   |
| Kinase D-interacting substrate of 220 kDa                                                                         | RAC2                            | 0,888967908 | 41402000000 |
| Heterogeneous nuclear ribonucleoprotein U-like protein 1                                                          | KIDINS220                       | 0,888888889 | 268820000   |
| E3 ubiquitin-protein ligase RNF213                                                                                | HNRNPUL1                        | 0,888888889 | 2972800000  |
| Peptide-N(4)-(N-acetyl-beta-glucosaminyl)asparagine amidase                                                       | RNF213                          | 0,888898884 | 1515700000  |
| Cathepsin Z                                                                                                       | NGLY1                           | 0,888651915 | 301270000   |
| Fructose-bisphosphate aldolase A                                                                                  | CTSZ                            | 0,888572952 | 3746100000  |
| Autophagy-related protein 2 homolog B                                                                             | ALDOA                           | 0,888572952 | 3,2726E+11  |
| Phostensin                                                                                                        | ATG2B                           | 0,888178346 | 52741000    |
| Bcl-2-associated transcription factor 1                                                                           | PPP1R18                         | 0,887941751 | 33542000    |
| Aldo-keto reductase family 1 member B10                                                                           | BCLAF1                          | 0,887862914 | 921130000   |
| Actin-related protein 2/3 complex subunit 4                                                                       | AKR1B10                         | 0,887705282 | 7198300000  |
| Polyribonucleotide nucleotidyltransferase 1, mitochondrial                                                        | ARPC4-TLL3;ARPC4                | 0,887390185 | 30567000000 |
| Methylthioribulose-1-phosphate dehydratase                                                                        | PNPT1                           | 0,887311446 | 2572100000  |
| Adaptin ear-binding coat-associated protein 1                                                                     | TPP2                            | 0,887311446 | 101760000   |
| Density-regulated protein                                                                                         | APIP                            | 0,887311446 | 500880000   |
| Tetrapeptide repeat protein 9C                                                                                    | NECAP1                          | 0,887154011 | 135030000   |
| Neutral alpha-glucosidase AB                                                                                      | DENR                            | 0,887075313 | 2493800000  |
| CAAX prenyl protease 2                                                                                            | TTC9C                           | 0,88691796  | 583460000   |
| DDB1- and CUL4-associated factor 8                                                                                | GANAB                           | 0,886839305 | 2906000000  |
| Enhancer of mRNA-decapping protein 4                                                                              | RCE1                            | 0,886839305 | 106510000   |
| Lysophospholipid acyltransferase LPCAT4                                                                           | DCAF8                           | 0,886682036 | 239830000   |
| SUZ domain-containing protein 1                                                                                   | EDC4                            | 0,886603422 | 3007800000  |
| Heat shock protein 75 kDa, mitochondrial                                                                          | LPCAT4                          | 0,886524823 | 66377000    |
| Protein disulfide-isomerase                                                                                       | SZRD1                           | 0,886446237 | 584840000   |
| Early endosome antigen 1                                                                                          | TRAP1                           | 0,886053518 | 7799900000  |
| Four and a half LIM domains protein 3                                                                             | P4HB                            | 0,886053518 | 51763000000 |
| 10 kDa heat shock protein, mitochondrial                                                                          | EEA1                            | 0,886053518 | 4775900000  |
| Pinin                                                                                                             | FHL3                            | 0,885975016 | 1060500000  |
| Very-long-chain (3R)-3-hydroxyacyl-CoA dehydratase 2                                                              | EPFP1;HSPE1                     | 0,885896527 | 3390900000  |
| Ubinuclein-2                                                                                                      | PNN                             | 0,885896527 | 525250000   |
| Glucosamine 6-phosphate N-acetyltransferase                                                                       | PTPLB                           | 0,885818053 | 247010000   |
| Persulfide dioxygenase ETHE1, mitochondrial                                                                       | UBN2                            | 0,885818053 | 175360000   |
| RNA-binding protein 10                                                                                            | GNFNAT1                         | 0,885739593 | 5206800000  |
| Phosphoserine aminotransferase                                                                                    | ETHE1                           | 0,885504295 | 988790000   |
| Phosphoacetylglucosamine mutase                                                                                   | DKFZp686E2459;RBM10             | 0,88542589  | 302610000   |
| Latrophilin-2                                                                                                     | PSAT1                           | 0,885190759 | 71759000000 |
| Single-stranded DNA-binding protein 2;Single-stranded DNA-binding protein 3;Single-stranded DNA-binding protein 4 | PGM3                            | 0,885190759 | 453430000   |
| Dolichol-phosphate mannosyltransferase subunit 3                                                                  | LPHN2                           | 0,884642604 | 3750100000  |
| NAD(P) transhydrogenase, mitochondrial                                                                            | SSBP4;SSBP2;SSBP3               | 0,884407889 | 806940000   |
| Mitochondrial glutamate carrier 1;Mitochondrial glutamate carrier 2                                               | DPM3                            | 0,884329678 | 288040000   |
| BAG family molecular chaperone regulator 4                                                                        | NNT                             | 0,883782589 | 4662600000  |
| Disintegrin and metalloproteinase domain-containing protein 17                                                    | SLC25A22;SLC25A18               | 0,883782589 | 1158600000  |
| Malignant T-cell-amplified sequence 1                                                                             | BAG4                            | 0,883782589 | 8585900     |
| MIT domain-containing protein 1                                                                                   | ADAM17                          | 0,883782589 | 24489000    |
| Macrophage-capping protein                                                                                        | MCTS1                           | 0,88354833  | 5121100000  |
| Prohibitin                                                                                                        | MITD1                           | 0,883314195 | 169550000   |
| Glyoxalase domain-containing protein 4                                                                            | CPG                             | 0,882768362 | 28652000000 |
| Protein NDRG1                                                                                                     | PHB;HEL-S-54e                   | 0,882612533 | 98651000000 |
| Ras-related protein Rab-4B                                                                                        | C17orf25;GLOD4                  | 0,882612533 | 3841600000  |
| PIH1 domain-containing protein 1                                                                                  | TRG14;NDRG1                     | 0,882534639 | 331680000   |
| Cytochrome b-c1 complex subunit 7                                                                                 | RAB4B                           | 0,882534639 | 2007000000  |
| Huntingtin                                                                                                        | NME1-NME2                       | 0,882378893 | 270530000   |
| NFU1 iron-sulfur cluster scaffold homolog, mitochondrial                                                          | PIH1D1                          | 0,882378893 | 54886000    |
| GPI ethanolamine phosphate transferase 1                                                                          | HTT;HD                          | 0,882067566 | 744600000   |
| Manganese-transporting ATPase 13A1                                                                                | NFU1                            | 0,881989769 | 1207700000  |
| Dihydropyridyllysine-residue succinyltransferase component of 2-oxoglutarate dehydrogenase complex, mitochondrial | PIGN                            | 0,881600987 | 2315000000  |
| Protein disulfide-isomerase A4                                                                                    | ATP13A1                         | 0,881523272 | 195900000   |
| Solute carrier family 35 member B1                                                                                | DST-E2k                         | 0,881367883 | 1487800000  |
| GTPase NRas                                                                                                       | PDIA4                           | 0,881290209 | 1489600000  |
|                                                                                                                   | SLC35B1                         | 0,880979649 | 15899000000 |
|                                                                                                                   | NRAS                            | 0,880746873 | 175600000   |
|                                                                                                                   |                                 | 0,880669309 | 548510000   |



|                                                                                                                             |                             |             |              |
|-----------------------------------------------------------------------------------------------------------------------------|-----------------------------|-------------|--------------|
| Serine--tRNA ligase, cytoplasmic                                                                                            | SARS                        | 0,880591758 | 18405000000  |
| Dedicator of cytokinesis protein 5                                                                                          | DOCK5;DKFZp779M164;DKFZp78' | 0,880591758 | 978990000    |
| Prohibitin-2                                                                                                                | PHB2                        | 0,880359187 | 83200000000  |
| Apoptosis-inducing factor 1, mitochondrial                                                                                  | AIFM1                       | 0,880359187 | 23026000000  |
| Ribonuclease 3                                                                                                              | DROSHA                      | 0,880204207 | 171370000    |
| Asparagine synthetase [glutamine-hydrolyzing];Asparagine synthetase                                                         | ASNS                        | 0,880049283 | 86292000000  |
| Solute carrier family 2, facilitated glucose transporter member 1                                                           | SLC2A1                      | 0,879894413 | 5928000000   |
| [3-methyl-2-oxobutanoate dehydrogenase [lipoamide]] kinase, mitochondrial                                                   | BCKDK                       | 0,879816998 | 155090000    |
| Peroxisome assembly factor 2                                                                                                | PEX6                        | 0,879584836 | 397030000    |
| Tumor protein D52                                                                                                           | TPD52                       | 0,879507476 | 5266900000   |
| AP-1 complex subunit gamma-like 2                                                                                           | AP1G2                       | 0,879507476 | 2784300000   |
| Glycerol kinase;Putative glycerol kinase 3                                                                                  | GK;GK3P                     | 0,879043601 | 6407100000   |
| E3 ubiquitin-protein ligase SMURF1                                                                                          | DKFZp564H223;SMURF1         | 0,878966336 | 11205000000  |
| ADP/ATP translocase 2;ADP/ATP translocase 2, N-terminally processed                                                         | SLC25A5                     | 0,878889084 | 3,4198E+11   |
| Reticulon-4-interacting protein 1, mitochondrial                                                                            | RTN4IP1;NIMP                | 0,878889084 | 2204500000   |
| 39S ribosomal protein L44, mitochondrial                                                                                    | MRPL44                      | 0,878657411 | 5989300000   |
| ATP-dependent RNA helicase SUPV3L1, mitochondrial                                                                           | SUPV3L1                     | 0,878657411 | 3277000000   |
| Malate dehydrogenase, cytoplasmic;Malate dehydrogenase                                                                      | MDH1                        | 0,878657411 | 15469000000  |
| Sentrin-specific protease 3                                                                                                 | SEN3                        | 0,878657411 | 323490000    |
| Autophagy-related protein 101                                                                                               | ATG101                      | 0,878503031 | 286210000    |
| Microtubule-associated protein 1A;MAP1A heavy chain;MAP1 light chain LC2                                                    | MAP1A                       | 0,878425861 | 5867500000   |
| Small nuclear ribonucleoprotein G;Putative small nuclear ribonucleoprotein G-like protein 15                                | SNRPG;SNRPGP15              | 0,878425861 | 44643000000  |
| Acetyl-CoA acetyltransferase, cytosolic                                                                                     | ACAT2                       | 0,878348704 | 31491000000  |
| Pyroglutamyl-peptidase 1                                                                                                    | PGPEP1                      | 0,878348704 | 3492800000   |
| G1/S-specific cyclin-D2                                                                                                     | CCND2                       | 0,878271562 | 23540000000  |
| ES1 protein homolog, mitochondrial                                                                                          | C21orf33                    | 0,878117316 | 29113000000  |
| GDP-L-fucose synthase                                                                                                       | TSTA3                       | 0,878117316 | 9913100000   |
| Proteasome activator complex subunit 2                                                                                      | PSME2                       | 0,877963126 | 131210000000 |
| Peroxisomal carnitine O-octanoyltransferase                                                                                 | CROT                        | 0,877731941 | 262450000    |
| Trifunctional enzyme subunit alpha, mitochondrial;Long-chain enoyl-CoA hydratase;Long chain 3-hydroxyacyl-CoA dehydrogenase | HADHA                       | 0,877654906 | 42740000000  |
| Structural maintenance of chromosomes flexible hinge domain-containing protein 1                                            | SMCHD1                      | 0,877500878 | 24192000000  |
| D-3-phosphoglycerate dehydrogenase                                                                                          | PHGDH;PGDH3                 | 0,877423883 | 40428000000  |
| Dihydroxyacetone phosphate acyltransferase                                                                                  | GNPAT                       | 0,877346903 | 1448700000   |
| MICOS complex subunit MIC19                                                                                                 | CHCHD3                      | 0,877346903 | 44623000000  |
| Protein FAM98B                                                                                                              | FAM98B                      | 0,877346903 | 6798100000   |
| Sorcin                                                                                                                      | SRI                         | 0,877192982 | 23056000000  |
|                                                                                                                             | ATP5H                       | 0,876885303 | 27961000000  |
| Mitochondrial carrier homolog 1                                                                                             | PIG60;MTCH1                 | 0,876424189 | 7866300000   |
| Putative ATP-dependent RNA helicase DHX30                                                                                   | DHX30                       | 0,876040298 | 4170700000   |
| Gamma-tubulin complex component 3                                                                                           | TUBGCP3                     | 0,876040298 | 29596000000  |
| Zinc finger ZZ-type and EF-hand domain-containing protein 1                                                                 | ZZEF1                       | 0,875886835 | 6561000000   |
| Protein TBRG4                                                                                                               | TBRG4                       | 0,875656743 | 10146000000  |
| NF-kappa-B inhibitor-interacting Ras-like protein 2                                                                         | NKIRAS2                     | 0,87535014  | 2437600000   |
| Transmembrane protein 43                                                                                                    | TMEM43;FLJ00144             | 0,875043752 | 29172000000  |
| Armadillo repeat-containing protein 1                                                                                       | ARMC1                       | 0,874967189 | 7359800000   |
| Pre-mRNA-splicing factor CWC22 homolog                                                                                      | CWC22                       | 0,874967189 | 2103200000   |
| Gamma-tubulin complex component 2                                                                                           | TUBGCP2                     | 0,874814102 | 17850000000  |
| 2-oxoglutarate dehydrogenase, mitochondrial                                                                                 | OGDH                        | 0,874584572 | 92001000000  |
| L-fucose kinase                                                                                                             | FUK                         | 0,874431619 | 882050000    |
| Ral GTPase-activating protein subunit beta                                                                                  | RALGAPB                     | 0,87427872  | 4310900000   |
| Rho GTPase-activating protein 25                                                                                            | KIAA0053;ARHGAP25           | 0,873973082 | 5247400000   |
| Myotubularin-related protein 5                                                                                              | SBF1                        | 0,873591334 | 5152500000   |
| Transcription elongation factor B polypeptide 3                                                                             | TCEB3                       | 0,873438728 | 5991200000   |
| Aspartyl aminopeptidase                                                                                                     | DNPEP                       | 0,873286176 | 36299000000  |
| Ribosome-recycling factor, mitochondrial                                                                                    | MRRF                        | 0,873133677 | 1652600000   |
| Vesicle transport through interaction with t-SNAREs homolog 1A                                                              | VT11A                       | 0,872981231 | 12649000000  |
| Glutathione S-transferase omega-1                                                                                           | GSTO1                       | 0,872981231 | 86856000000  |
| Ubiquinol-cytochrome-c reductase complex assembly factor 1                                                                  | UQC11;UQCC                  | 0,872752662 | 45424000000  |
| Tetrapeptide repeat protein 7A                                                                                              | TTC7A                       | 0,872600349 | 14175000000  |
| Serine protease HTRA2, mitochondrial                                                                                        | HTRA2                       | 0,872524213 | 9765800000   |
| Rho GTPase-activating protein 9                                                                                             | ARHGAP9                     | 0,872448089 | 11440000000  |
|                                                                                                                             |                             | 0,872371979 | 805620000    |
| Reticulon-4;Reticulon                                                                                                       | RTN4;Nbla00271;NOGOC        | 0,872067672 | 112720000000 |
| ATP synthase F(0) complex subunit C2, mitochondrial;ATP synthase F(0) complex subunit C1, mitochondrial;ATP synthase        | ATP5G2;ATP5G1;ATP5G3        | 0,871915599 | 15734000000  |
| NF-kappa-B essential modulator                                                                                              | IKBK                        | 0,871839582 | 2798800000   |
| Tumor necrosis factor alpha-induced protein 8-like protein 2                                                                | TNFAIP8L2                   | 0,871004268 | 1391000000   |
| Protein ERGIC-53                                                                                                            | LMAN1                       | 0,870700914 | 13935000000  |
| Ceramide synthase 2                                                                                                         | CERS2                       | 0,870625109 | 111690000000 |
| 1-phosphatidylinositol 4,5-bisphosphate phosphodiesterase beta-2;Phosphoinositide phospholipase C                           | PLCB2                       | 0,86979212  | 1232900000   |
| Glutamate dehydrogenase;Glutamate dehydrogenase 1, mitochondrial;Glutamate dehydrogenase 2, mitochondrial                   | GLUD1;GLUD2                 | 0,869716472 | 90174000000  |
| Alpha-actinin-2                                                                                                             | ACTN2                       | 0,86948961  | 2796900000   |
| Melanoma inhibitory activity protein 3                                                                                      | MIA3                        | 0,869338433 | 3605100000   |
| Autophagy protein 5                                                                                                         | ATG5                        | 0,868809731 | 1560900000   |
| Arginase-1                                                                                                                  | ARG1                        | 0,868734254 | 3802200000   |
| Transcriptional activator protein Pur-beta                                                                                  | PURB                        | 0,868507903 | 27141000000  |
| Amyloid beta A4 precursor protein-binding family B member 1-interacting protein                                             | APBB1P                      | 0,868281671 | 1470100000   |
| Protein LYRIC                                                                                                               | MTDH                        | 0,868206286 | 30196000000  |
| Glycerol-3-phosphate dehydrogenase, mitochondrial                                                                           | GPD2                        | 0,86798021  | 27130000000  |
| Calumenin                                                                                                                   | CALU                        | 0,86798021  | 80620000000  |
| AT-rich interactive domain-containing protein 1B                                                                            | ARID1B                      | 0,86798021  | 574810000    |
| Constitutive coactivator of PPAR-gamma-like protein 1                                                                       | FAM120A                     | 0,867528412 | 28345000000  |
| Kinesin-like protein KIF13A                                                                                                 | KIF13A                      | 0,867377917 | 165430000    |
| Retinol dehydrogenase 14                                                                                                    | RDH14                       | 0,867302689 | 5400700000   |
| Inorganic pyrophosphatase 2, mitochondrial                                                                                  | PPA2                        | 0,867077083 | 6249700000   |
| Cancer-related nucleoside-triphosphatase                                                                                    | C1orf57;NTPCR               | 0,867001907 | 3137500000   |
| Actin-binding protein anillin                                                                                               | ANLN                        | 0,866851595 | 187730000    |
| Zinc-binding alcohol dehydrogenase domain-containing protein 2                                                              | ZADH2                       | 0,866776458 | 4567400000   |
| Nuclear cap-binding protein subunit 2                                                                                       | NCBP2                       | 0,866701335 | 1394900000   |
| NADH dehydrogenase [ubiquinone] 1 alpha subcomplex subunit 5                                                                | NDUFA5                      | 0,866551127 | 6013800000   |
| Pyruvate kinase PKM;Pyruvate kinase                                                                                         | PKM;PKM2                    | 0,866325912 | 1,9973E+11   |
| Macrophage migration inhibitory factor                                                                                      | MIF                         | 0,866250866 | 92884000000  |
| TFIIH basal transcription factor complex helicase XPD subunit                                                               | ERCC2                       | 0,866250866 | 1940500000   |
| Cytoplasmic FMR1-interacting protein 2                                                                                      | CYFIP2;DKFZp761H087         | 0,866100814 | 90641000000  |
| Probable aminopeptidase NPEPL1                                                                                              | NPEPL1                      | 0,866025808 | 7099800000   |
| Protein odr-4 homolog                                                                                                       | ODR4                        | 0,865576041 | 2331400000   |
| Synaptosomal-associated protein;Synaptosomal-associated protein 23                                                          | SNAP23                      | 0,865501125 | 9163300000   |
| Glutamine--tRNA ligase                                                                                                      | QARS                        | 0,865501125 | 23016000000  |
| 2-oxoisovalerate dehydrogenase subunit beta, mitochondrial                                                                  | BCKDHB                      | 0,865351333 | 7846500000   |
| NADH-cytochrome b5 reductase 3;NADH-cytochrome b5 reductase 3 membrane-bound form;NADH-cytochrome b5 reductase              | CYB5R3                      | 0,865201592 | 29589000000  |
| Aldehyde dehydrogenase family 16 member A1                                                                                  | ALDH16A1                    | 0,864154857 | 5622400000   |
| Signal peptidase complex subunit 3                                                                                          | SPCS3                       | 0,86400553  | 69070000000  |
| Voltage-dependent anion-selective channel protein 2                                                                         | VDAC2                       | 0,863930886 | 312730000000 |
| Protein YIPF3;Protein YIPF3, 36 kDa form III                                                                                | YIPF3                       | 0,863856254 | 209410000    |
| Translocon-associated protein subunit delta                                                                                 | SSR4                        | 0,863781636 | 79414000000  |
|                                                                                                                             |                             | 0,863632438 | 7608200000   |
| Galectin-1                                                                                                                  | LGALS1                      | 0,863259669 | 35413000000  |
| Mitochondrial import receptor subunit TOM40 homolog                                                                         | TOMM40                      | 0,863110651 | 38777000000  |
| Gamma-enolase;Enolase                                                                                                       | ENO2                        | 0,863036161 | 220110000000 |

|                                                                                                                         |                                     |             |             |
|-------------------------------------------------------------------------------------------------------------------------|-------------------------------------|-------------|-------------|
| Annexin;Annexin A5                                                                                                      | ANXA5                               | 0,862887221 | 56975000000 |
| Coiled-coil domain-containing protein 178                                                                               | CCDC178;C18orf34                    | 0,862663906 | 21726000000 |
| GMP reductase 1                                                                                                         | GMPR                                | 0,862291972 | 470240000   |
| Hyaluronan synthase 2                                                                                                   | HAS2                                | 0,862068966 | 728790000   |
| Protein FAM118B                                                                                                         | FAM118B                             | 0,862068966 | 676910000   |
| Protein mago nashi homolog;Protein mago nashi homolog 2                                                                 | MAGOH;MAGOHB                        | 0,861994656 | 55335000000 |
| Pyridoxal-dependent decarboxylase domain-containing protein 1;Putative pyridoxal-dependent decarboxylase domain-contain | PDXDC1;PDXDC2P                      | 0,861994656 | 387950000   |
| Phosphatidylinositol 4-kinase alpha                                                                                     | PI4KA;PIK4CA variant protein;hCG_   | 0,861920359 | 56144000000 |
| ATP-dependent (S)-NAD(P)H-hydrate dehydratase                                                                           | FLJ10769;CARKD                      | 0,860807437 | 434910000   |
| Protein canopy homolog 2                                                                                                | CNPY2                               | 0,860807437 | 33845000000 |
| PDZ domain-containing protein 8                                                                                         | PDZD8                               | 0,860733345 | 673680000   |
| Oxygen-dependent coproporphyrinogen-III oxidase, mitochondrial                                                          | CPOX                                | 0,860141063 | 13273000000 |
|                                                                                                                         |                                     | 0,860141063 | 246000000   |
| NADH-cytochrome b5 reductase 1                                                                                          | CYB5R1                              | 0,860141063 | 24863000000 |
| Isocitrate dehydrogenase [NAD] subunit gamma, mitochondrial                                                             | IDH3G;hCG_2004980                   | 0,860067085 | 11347000000 |
| Multidrug resistance-associated protein 4                                                                               | ABCC4;MOAT-B                        | 0,860067085 | 396210000   |
| 7-dehydrocholesterol reductase                                                                                          | DHCR7                               | 0,85999312  | 735310000   |
| Procollagen-lysine,2-oxoglutarate 5-dioxygenase 3                                                                       | PLOD3;DKFZp56401822                 | 0,859623485 | 1002000000  |
| Rapamycin-insensitive companion of mTOR                                                                                 | RICTOR                              | 0,859549596 | 239090000   |
| Isoleucine--tRNA ligase, cytoplasmic                                                                                    | DKFZp686L0869;IARS;DKFZp686L        | 0,85947572  | 16922000000 |
| Elongation of very long chain fatty acids protein;Elongation of very long chain fatty acids protein 5                   | ELOVL5                              | 0,859254167 | 504420000   |
| Procollagen-lysine,2-oxoglutarate 5-dioxygenase 1                                                                       | PLOD1                               | 0,858811405 | 552270000   |
| H(+)/Cl(-) exchange transporter 5;H(+)/Cl(-) exchange transporter 4                                                     | CLCN5;CLCN4                         | 0,858516484 | 161780000   |
| Isocitrate dehydrogenase [NAD] subunit alpha, mitochondrial                                                             | IDH3A                               | 0,858442785 | 32118000000 |
| Long-chain fatty acid transport protein 4                                                                               | SLC27A4                             | 0,858295425 | 398090000   |
| Syntaxin-binding protein 3                                                                                              | STXB3P3                             | 0,858148116 | 193920000   |
| DnaJ homolog subfamily C member 11                                                                                      | DNAJC11                             | 0,858008058 | 303250000   |
| Zinc finger MYM-type protein 4                                                                                          | ZMYM4                               | 0,857706493 | 834340000   |
| Vacuolar protein sorting-associated protein 52 homolog                                                                  | VPS52                               | 0,857632933 | 243920000   |
| ATP synthase subunit epsilon-like protein, mitochondrial;ATP synthase subunit epsilon, mitochondrial                    | ATP5EP2;ATP5E                       | 0,857559386 | 28076000000 |
| Heterogeneous nuclear ribonucleoprotein U-like protein 2                                                                | HNRNPUL2;BSCL2;HNRNPUL2             | 0,857485851 | 17438000000 |
| Thioredoxin domain-containing protein 9                                                                                 | TXNDC9                              | 0,857485851 | 552520000   |
| Integrin alpha-4                                                                                                        | ITGA4                               | 0,85741233  | 327980000   |
| Cytoplasmic dynein 1 heavy chain 1                                                                                      | DYNC1H1                             | 0,857265324 | 1,1924E+11  |
| Mitochondrial import receptor subunit TOM5 homolog                                                                      | TOMM5                               | 0,856971463 | 388720000   |
|                                                                                                                         |                                     | 0,856971463 | 14605000000 |
| Golgin subfamily A member 5                                                                                             | GOLGA5                              | 0,856824608 | 512660000   |
|                                                                                                                         |                                     | 0,856751199 | 355760000   |
| Elongation factor Ts;Elongation factor Ts, mitochondrial                                                                | TSFM                                | 0,856751199 | 11274000000 |
| Ubiquitin-conjugating enzyme E2 H                                                                                       | UBE2H                               | 0,856531049 | 12195000000 |
| NADH dehydrogenase [ubiquinone] flavoprotein 1, mitochondrial                                                           | NDUFV1                              | 0,856311012 | 34152000000 |
| DNA polymerase;DNA polymerase delta catalytic subunit                                                                   | POLD1                               | 0,856164384 | 48706000000 |
| Lymphocyte cytosolic protein 2                                                                                          | LCP2                                | 0,856164384 | 10872000000 |
| Vesicle transport protein SFT2A                                                                                         | SFT2D1                              | 0,855944535 | 484900000   |
| Glycerol kinase 2                                                                                                       | GK2                                 | 0,855724799 | 129550000   |
| Asparagine--tRNA ligase, cytoplasmic                                                                                    | NARS                                | 0,855431993 | 16118000000 |
| Pre-mRNA-splicing factor ATP-dependent RNA helicase PRP16                                                               | DHX38                               | 0,855285665 | 959630000   |
| Transmembrane protein C16orf54                                                                                          | C16orf54                            | 0,855066268 | 837750000   |
| Translocation protein SEC62                                                                                             | SEC62;TLOC1                         | 0,85499316  | 456010000   |
|                                                                                                                         |                                     | 0,854554777 | 136000000   |
| ATP synthase subunit gamma;ATP synthase subunit gamma, mitochondrial                                                    | ATP5C1                              | 0,854481757 | 12894000000 |
| A disintegrin and metalloproteinase with thrombospondin motifs 14                                                       | ADAMTS14                            | 0,854408749 | 744970000   |
| ADP-ribosylation factor GTPase-activating protein 3                                                                     | ARFGAP3                             | 0,854262771 | 278010000   |
| Glycosylphosphatidylinositol anchor attachment 1 protein                                                                | GPA1                                | 0,854043898 | 1899000000  |
| Trifunctional enzyme subunit beta, mitochondrial;3-ketoacyl-CoA thiolase                                                | HADHB                               | 0,853752241 | 56602000000 |
| Endoplasmic reticulum-Golgi intermediate compartment protein 3                                                          | ERGIC3                              | 0,853606487 | 474340000   |
| Tuftelin-interacting protein 11                                                                                         | TFIP11                              | 0,853606487 | 444180000   |
| TATA-binding protein-associated factor 2N                                                                               | TA15                                | 0,853460783 | 555110000   |
| Ubiquitin-protein ligase E3A                                                                                            | UBE3A                               | 0,85338795  | 1931000000  |
| Zinc transporter 6                                                                                                      | SLC30A6                             | 0,853315129 | 730780000   |
| ATP synthase F(0) complex subunit B1, mitochondrial                                                                     | ATP5F1;hCG_39985                    | 0,853096741 | 75242000000 |
| UMP-CMP kinase                                                                                                          | CMPK1;CMPK                          | 0,85302397  | 21399000000 |
| Importin-13                                                                                                             | IPO13                               | 0,85302397  | 743420000   |
| Voltage-dependent anion-selective channel protein 3                                                                     | VDAC3                               | 0,852733009 | 31740000000 |
| Phosphatidylinositol 3,4,5-trisphosphate-dependent Rac exchanger 1 protein                                              | PREX1                               | 0,852514919 | 9755300     |
|                                                                                                                         |                                     | 0,852442247 | 943160000   |
| Golgin subfamily B member 1                                                                                             | GOLGB1                              | 0,852442247 | 203970000   |
| AP-3 complex subunit beta-1                                                                                             | AP3B1                               | 0,851716208 | 44689000000 |
| Hypermethylated in cancer 2 protein                                                                                     | HIC2                                | 0,851498638 | 22040000000 |
| Lambda-crystallin homolog                                                                                               | CRYL1                               | 0,851353652 | 201480000   |
| TraB domain-containing protein                                                                                          | RP3-402G11.12;TRABD                 | 0,851208716 | 521760000   |
| UTP--glucose-1-phosphate uridylyltransferase                                                                            | UGP2                                | 0,85106383  | 11251000000 |
| Lipoamide acyltransferase component of branched-chain alpha-keto acid dehydrogenase complex, mitochondrial              | DBT                                 | 0,850918993 | 11581000000 |
| Cytochrome b5                                                                                                           | CYB5A                               | 0,850774205 | 28133000000 |
| Voltage-dependent anion-selective channel protein 1                                                                     | VDAC1                               | 0,850051003 | 42952000000 |
| Amino-terminal enhancer of split                                                                                        | AES                                 | 0,849762067 | 586930000   |
| Anion exchange protein 2                                                                                                | SLC4A2                              | 0,84932903  | 440320000   |
| Receptor-type tyrosine-protein phosphatase;Receptor-type tyrosine-protein phosphatase alpha                             | PTPRA                               | 0,849184783 | 256980000   |
| RAC-alpha serine/threonine-protein kinase                                                                               | AKT1                                | 0,848824378 | 166210000   |
|                                                                                                                         |                                     | 0,848752334 | 561380000   |
| Vacuolar protein sorting-associated protein 45                                                                          | VPS45                               | 0,848752334 | 221020000   |
| Acyl-CoA synthetase family member 2, mitochondrial                                                                      | ACSXF2                              | 0,848608282 | 245080000   |
| Peroxisomal biogenesis factor 3                                                                                         | PEX3                                | 0,848536275 | 402750000   |
| Cyclic AMP-responsive element-binding protein 1                                                                         | CREB1                               | 0,848176421 | 681920000   |
| Group XV phospholipase A2                                                                                               | PLA2G15                             | 0,847744998 | 754110000   |
| Ribonuclease P protein subunit p25-like protein                                                                         | RPP25L                              | 0,846740051 | 159160000   |
| Alanine--tRNA ligase, cytoplasmic                                                                                       | AARS                                | 0,84645336  | 23434000000 |
| Alkyl(dihydroxyacetone)phosphate synthase, peroxisomal                                                                  | AGPS                                | 0,84609527  | 1005500000  |
| Succinate dehydrogenase [ubiquinone] flavoprotein subunit, mitochondrial                                                | SDHA                                | 0,845809016 | 10094000000 |
| Ras-related protein Rab-18                                                                                              | RAB18                               | 0,845737483 | 61020000000 |
| Ferritin;Ferritin heavy chain;Ferritin heavy chain, N-terminally processed                                              | FTH1                                | 0,845665962 | 13243000000 |
| Protein transport protein Sec24D                                                                                        | SEC24D                              | 0,844951415 | 485540000   |
| Apolipoprotein O                                                                                                        | APOO                                | 0,844737287 | 257860000   |
| Dihydropolyl dehydrogenase;Dihydropolyl dehydrogenase, mitochondrial                                                    | DLD                                 | 0,844380647 | 87394000000 |
| NTF2-related export protein 1                                                                                           | NXT1                                | 0,844238075 | 284050000   |
| Stromal interaction molecule 1                                                                                          | STIM1                               | 0,843597098 | 580950000   |
| UPF0317 protein C14orf159, mitochondrial                                                                                | C14orf159;C14orf159 variant protein | 0,843525938 | 366430000   |
| Arf-GAP with coiled-coil, ANK repeat and PH domain-containing protein 1                                                 | ACAP1                               | 0,843525938 | 11138000000 |
| Rho guanine nucleotide exchange factor 1                                                                                | ARHGEF1                             | 0,843383655 | 31498000000 |
| ADP-ribosylation factor-like protein 2                                                                                  | hCG_23373;ARL2                      | 0,843028157 | 25884000000 |
| Serine beta-lactamase-like protein LACTB, mitochondrial                                                                 | LACTB                               | 0,842886042 | 150790000   |
| SLIT-ROBO Rho GTPase-activating protein 2;SLIT-ROBO Rho GTPase-activating protein 2C                                    | SRGAP2;SRGAP2C                      | 0,842815002 | 557430000   |
| DNA repair protein complementing XP-G cells                                                                             | BIVM-ERCC5;ERCC5                    | 0,842530963 | 349680000   |
| Purine nucleoside phosphorylase;S-methyl-5-thioadenosine phosphorylase                                                  | MTAP                                | 0,842176183 | 28380000000 |
| Conserved oligomeric Golgi complex subunit 6                                                                            | COG6                                | 0,842176183 | 678140000   |
| Conserved oligomeric Golgi complex subunit 5                                                                            | COG5                                | 0,841892575 | 449310000   |
| Phosphorylase b kinase regulatory subunit beta                                                                          | PHKB                                | 0,841467519 | 151360000   |
| Probable asparagine--tRNA ligase, mitochondrial                                                                         | NARS2                               | 0,841396719 | 298940000   |

|                                                                                                                |                           |             |             |
|----------------------------------------------------------------------------------------------------------------|---------------------------|-------------|-------------|
| Mitochondrial coenzyme A transporter SLC25A42                                                                  | SLC25A42                  | 0,841396719 | 73564000    |
| Protein-methionine sulfoxide oxidase MICAL1                                                                    | MICAL1                    | 0,841396719 | 1085900000  |
| Succinyl-CoA ligase [ADP/GDP-forming] subunit alpha, mitochondrial                                             | SUCLG1                    | 0,840760047 | 9607900000  |
| 3-ketoacyl-CoA thiolase, mitochondrial                                                                         | ACAA2                     | 0,840336134 | 2511100000  |
| Galectin-related protein                                                                                       | LGALS1                    | 0,840124338 | 409510000   |
| 5(3)-deoxyribonucleotidase, cytosolic type                                                                     | NTSC                      | 0,839630563 | 2195100000  |
| Very-long-chain (3R)-3-hydroxyacyl-CoA dehydratase 3                                                           | PTPLAD1                   | 0,839560071 | 1326900000  |
| Mitochondrial Rho GTPase;Mitochondrial Rho GTPase 1                                                            | TMEM91;RHOT1              | 0,838855801 | 374240000   |
| Single-stranded DNA-binding protein;Single-stranded DNA-binding protein, mitochondrial                         | SSBP1                     | 0,838785439 | 1228800000  |
| Round spermatid basic protein 1                                                                                | RSBN1                     | 0,838293235 | 75988000    |
| 39S ribosomal protein L13, mitochondrial                                                                       | MRPL13                    | 0,838152711 | 841640000   |
| Nck-associated protein 1                                                                                       | NCKAP1                    | 0,838152711 | 174940000   |
| Dimethyladenosine transferase 1, mitochondrial                                                                 | TFB1M                     | 0,838082467 | 54050000    |
| Small integral membrane protein 12                                                                             | C1orf212;SMIM12           | 0,838012235 | 51105000    |
| Serine/threonine-protein kinase N2                                                                             | PKN2                      | 0,837942014 | 82125000    |
| Mitochondrial-processing peptidase subunit beta                                                                | PMPCB;DKFZp586i1223       | 0,837871806 | 2976900000  |
| Coronin-1B;Coronin                                                                                             | CORO1B;DKFZp762i166       | 0,837731423 | 4460100000  |
| Alpha-enolase;Enolase                                                                                          | ENO1                      | 0,83766125  | 3,2479E+11  |
| Striatin-3                                                                                                     | STRN3                     | 0,83766125  | 336120000   |
| Succinate dehydrogenase [ubiquinone] iron-sulfur subunit, mitochondrial                                        | SDHB                      | 0,8374508   | 8298800000  |
| Dehydrogenase/reductase SDR family member 1                                                                    | DHRS1                     | 0,837100285 | 1498400000  |
| Translational activator of cytochrome c oxidase 1                                                              | TACO1                     | 0,836890116 | 429730000   |
| Dedicator of cytokinesis protein 10                                                                            | DOCK10;DKFZp781A1532      | 0,836610056 | 4637800000  |
| Protein phosphatase 1F                                                                                         | PPM1F                     | 0,836470096 | 139230000   |
| Echinoderm microtubule-associated protein-like 2                                                               | EML2                      | 0,836120401 | 1039000000  |
| Medium-chain specific acyl-CoA dehydrogenase, mitochondrial                                                    | ACADM;DKFZp686M24262      | 0,835770999 | 232880000   |
| NADH dehydrogenase [ubiquinone] 1 alpha subcomplex subunit 12                                                  | NDUFA12                   | 0,835561497 | 236030000   |
| Late secretory pathway protein AVL9 homolog                                                                    | AVL9                      | 0,835561497 | 31219000    |
| Long-chain specific acyl-CoA dehydrogenase, mitochondrial                                                      | ACAD3                     | 0,835142809 | 2423000000  |
| Aspartate aminotransferase, mitochondrial;Aspartate aminotransferase                                           | GOT2                      | 0,834933623 | 4861000000  |
| Regulatory-associated protein of mTOR                                                                          | RPTOR                     | 0,83423709  | 392110000   |
| Zinc finger Ran-binding domain-containing protein 2                                                            | ZRANB2                    | 0,834097923 | 762440000   |
| Sorting and assembly machinery component 50 homolog                                                            | SAMM50                    | 0,83388926  | 1206500000  |
| 39S ribosomal protein L27, mitochondrial                                                                       | MRPL27                    | 0,833263895 | 391260000   |
| Mitochondrial 2-oxoglutarate/malate carrier protein                                                            | SLC25A11                  | 0,832986256 | 2437100000  |
| Dedicator of cytokinesis protein 11                                                                            | DOCK11                    | 0,832986256 | 1946100000  |
| DNA ligase;DNA ligase 3                                                                                        | LIG3                      | 0,832847506 | 341250000   |
| Glutathione S-transferase P                                                                                    | GSTP1                     | 0,832639467 | 1461500000  |
| Threonine--tRNA ligase, cytoplasmic                                                                            | TARS                      | 0,832292967 | 14362000000 |
| Probable arginine--tRNA ligase, mitochondrial                                                                  | RARS2;RARS1               | 0,832223702 | 142170000   |
| NADH dehydrogenase [ubiquinone] iron-sulfur protein 4, mitochondrial                                           | NDUFS4                    | 0,832085206 | 1018300000  |
| Monoacylglycerol lipase ABHD12                                                                                 | ABHD12                    | 0,831808351 | 416820000   |
| Methylthioribose-1-phosphate isomerase                                                                         | MR1                       | 0,831739167 | 1558300000  |
| Aspartate--tRNA ligase, mitochondrial                                                                          | DARS2                     | 0,831462543 | 57300000    |
| LXR motif-containing protein 4                                                                                 | LYRM4                     | 0,831255195 | 114590000   |
| Peroxisomal membrane protein PMP34                                                                             | SLC25A17                  | 0,831186103 | 134930000   |
| Methyltransferase-like protein 7A                                                                              | METTL7A                   | 0,831047951 | 107020000   |
| Transmembrane emp24 domain-containing protein 7                                                                | TMED7                     | 0,830978893 | 6467400000  |
| ADP/ATP translocase 3;ADP/ATP translocase 3, N-terminally processed                                            | SLC25A6                   | 0,830633774 | 24067000000 |
| Treacle protein                                                                                                | TCOF1                     | 0,830495806 | 321140000   |
| Superoxide dismutase;Superoxide dismutase [Mn], mitochondrial                                                  | SOD2                      | 0,830357884 | 3970300000  |
| Cat eye syndrome critical region protein 5                                                                     | CECR5                     | 0,829462508 | 218810000   |
| Nucleoside diphosphate kinase;Nucleoside diphosphate kinase 3                                                  | c371H6.2;NME3             | 0,828706389 | 469720000   |
| Erlin-1                                                                                                        | SPFH1;ERLIN1              | 0,828706389 | 450460000   |
| Huntingtin-interacting protein 1                                                                               | HIP1                      | 0,82863772  | 475650000   |
| Up-regulated during skeletal muscle growth protein 5                                                           | USMG5                     | 0,828088771 | 499160000   |
| 2-aminoethanethiol dioxygenase                                                                                 | ADO                       | 0,826993053 | 410010000   |
| Vacuolar protein sorting-associated protein 13A                                                                | VPS13A                    | 0,826787929 | 1548200000  |
| Aspartyl/asparaginyl beta-hydroxylase                                                                          | ASPH                      | 0,826036676 | 2231900000  |
| Procollagen galactosyltransferase 1                                                                            | COLGALT1                  | 0,825968448 | 1716500000  |
| 39S ribosomal protein L14, mitochondrial                                                                       | MRPL14                    | 0,825559316 | 334440000   |
| Multiple coagulation factor deficiency protein 2                                                               | MCFD2                     | 0,825491167 | 502360000   |
| Aminoacylase-1                                                                                                 | ACY1;ABHD14A;ABHD14A-ACY1 | 0,825014438 | 748790000   |
| Metaxin-1                                                                                                      | MTX1                      | 0,824810294 | 466440000   |
| Retinoblastoma-binding protein 5                                                                               | RBBP5                     | 0,824742268 | 689850000   |
| Unconventional prefolin RPB5 interactor 1                                                                      | URI1;C19orf2              | 0,824674254 | 20439000    |
| Ubiquitin carboxyl-terminal hydrolase;Ubiquitin carboxyl-terminal hydrolase 8                                  | USP8                      | 0,824538259 | 306650000   |
| Acylglycerol kinase, mitochondrial                                                                             | AGK;FLJ10842              | 0,824470278 | 782710000   |
| Synaptosomal-associated protein 25                                                                             | SNAP25                    | 0,824266403 | 188990000   |
| Smith-Magenis syndrome chromosomal region candidate gene 8 protein                                             | SMCR8                     | 0,823723229 | 209230000   |
| Negative elongation factor E                                                                                   | NELF-E;NELFE;RDBP         | 0,823113013 | 270360000   |
| Isocitrate dehydrogenase [NAD] subunit beta, mitochondrial                                                     | IDH3B                     | 0,822909809 | 11931000000 |
| Succinyl-CoA:3-ketoacid-coenzyme A transferase;Succinyl-CoA:3-ketoacid coenzyme A transferase 1, mitochondrial | OXCT1;OXCT1               | 0,822571358 | 3411100000  |
| Peroxisomal membrane protein PEX14                                                                             | PEX14                     | 0,822097994 | 199990000   |
| Inositol 1,4,5-trisphosphate receptor type 3                                                                   | ITPR3                     | 0,821895291 | 1582300000  |
| Mitochondrial inner membrane protein COX18                                                                     | COX18                     | 0,821692687 | 44952000    |
| Alpha-aminoadipic semialdehyde dehydrogenase                                                                   | ALDH7A1                   | 0,821557673 | 70706000    |
| Stomatin-like protein 2, mitochondrial                                                                         | STOML2                    | 0,821018062 | 7636700000  |
| Glucokinase                                                                                                    | GCK                       | 0,820815891 | 2212900000  |
| Proteasome subunit beta type;Proteasome subunit beta type-8                                                    | PSMB8                     | 0,820546484 | 3932000000  |
| Long-chain-fatty-acid--CoA ligase 1                                                                            | ACSL1                     | 0,82000082  | 425640000   |
| Ras GTPase-activating-like protein IQGAP2                                                                      | IQGAP2                    | 0,819873739 | 2773800000  |
| RAC-beta serine/threonine-protein kinase                                                                       | AKT2                      | 0,819739323 | 84513000    |
| 3-ketoacyl-CoA thiolase, peroxisomal                                                                           | ACAA1                     | 0,819739323 | 582720000   |
| Synaptotagmin-2-binding protein                                                                                | SYNJ2BP                   | 0,818866689 | 1446800000  |
| 39S ribosomal protein L16, mitochondrial                                                                       | MRPL16                    | 0,818732602 | 470550000   |
| Small integral membrane protein 4                                                                              | SMIM4                     | 0,817929004 | 75477000    |
| Integrin alpha-6;Integrin alpha-6 heavy chain;Integrin alpha-6 light chain;Processed integrin alpha-6          | ITGA6                     | 0,817795224 | 255670000   |
| NADH dehydrogenase [ubiquinone] 1 alpha subcomplex assembly factor 4                                           | NDUFAF4                   | 0,817728351 | 274910000   |
| 2,3-cyclic-nucleotide 3-phosphodiesterase                                                                      | CNP                       | 0,817661488 | 42225000    |
| Protein CMSS1                                                                                                  | CMSS1;hCG_2023567         | 0,817460966 | 91409000    |
| Leucine--tRNA ligase, cytoplasmic                                                                              | TRPC3                     | 0,817260543 | 134640000   |
| Iron-sulfur cluster assembly enzyme ISCU, mitochondrial                                                        | LARS                      | 0,817126982 | 16830000000 |
| Helicase with zinc finger domain 2                                                                             | ISCU                      | 0,817060217 | 627490000   |
| Cysteine desulfurase, mitochondrial                                                                            | PRIC285;HELZ2             | 0,816993464 | 1032100000  |
| Signal-induced proliferation-associated 1-like protein 1                                                       | NFS1                      | 0,81679327  | 2044000000  |
| Mitochondrial-processing peptidase subunit alpha                                                               | SIP1L1                    | 0,81672856  | 83705000    |
| Triosephosphate isomerase                                                                                      | PMPCA                     | 0,816659861 | 1456600000  |
| 39S ribosomal protein L11, mitochondrial                                                                       | TPI1                      | 0,816659861 | 1,4015E+11  |
| Peptidyl-prolyl cis-trans isomerase NIMA-interacting 4                                                         | MRPL11                    | 0,816326531 | 492630000   |
| Protein aurora borealis                                                                                        | PIN4                      | 0,816259897 | 80771000    |
| DNA mismatch repair protein Msh3                                                                               | C13orf34;BORA             | 0,816193275 | 230630000   |
| Mitochondrial pyruvate carrier 2                                                                               | MSH3                      | 0,815527646 | 144420000   |
| Telomerase protein component 1                                                                                 | MPC2                      | 0,815394651 | 65351000    |
| ADP/ATP translocase 1                                                                                          | TEP1                      | 0,815195239 | 543720000   |
| Dynamin-binding protein                                                                                        | SLC25A4                   | 0,814929509 | 5888200000  |
| Electron transfer flavoprotein subunit alpha, mitochondrial                                                    | DNMBP                     | 0,814863103 | 109060000   |
|                                                                                                                | ETFA                      | 0,814398567 | 25996000000 |

|                                                                                                                                         |                              |             |            |
|-----------------------------------------------------------------------------------------------------------------------------------------|------------------------------|-------------|------------|
| Pyruvate dehydrogenase E1 component subunit beta, mitochondrial                                                                         | PDHB                         | 0,814067079 | 385030000  |
| Thromboxane-A synthase                                                                                                                  | TBXAS1;hCG_14925             | 0,813802083 | 129120000  |
| Peroxisomal membrane protein 11B                                                                                                        | PEX11B                       | 0,813404913 | 736430000  |
| Thymocyte nuclear protein 1                                                                                                             | THYN1                        | 0,813404913 | 664830000  |
| Ribosylidihydroxycotinamide dehydrogenase [quinone]                                                                                     | NQO2                         | 0,812942037 | 150560000  |
| Citrate lyase subunit beta-like protein, mitochondrial                                                                                  | CLYBL                        | 0,812743823 | 102910000  |
| ATP-binding cassette sub-family D member 1                                                                                              | ABCD1;ALD                    | 0,812545706 | 196590000  |
| Farnesyl pyrophosphate synthase                                                                                                         | FDPS                         | 0,812545706 | 190520000  |
| LisH domain and HEAT repeat-containing protein KIAA1468                                                                                 | KIAA1468                     | 0,812545706 | 396740000  |
| UV radiation resistance-associated gene protein                                                                                         | UVRAG                        | 0,812281699 | 139560000  |
| SRA stem-loop-interacting RNA-binding protein, mitochondrial                                                                            | SLIRP                        | 0,81214976  | 115870000  |
| Calcium and integrin-binding protein 1                                                                                                  | CIB1                         | 0,811951932 | 678020000  |
| NADH dehydrogenase [ubiquinone] iron-sulfur protein 7, mitochondrial                                                                    | NDUFS7                       | 0,811886011 | 100240000  |
| WD repeat-containing protein 81                                                                                                         | WDR81                        | 0,811886011 | 444080000  |
| Mannose-1-phosphate guanyltransferase beta                                                                                              | GMPPB                        | 0,811161583 | 221430000  |
| Phosphoglycerate kinase 1;Phosphoglycerate kinase                                                                                       | PGK1                         | 0,810766986 | 2,1112E+11 |
| Lysophosphatidylcholine acyltransferase 1                                                                                               | AYTL2;LPCAT1                 | 0,810766986 | 338710000  |
| Cleavage and polyadenylation specificity factor subunit 4                                                                               | CPSF4                        | 0,810175808 | 174350000  |
| Receptor expression-enhancing protein 5                                                                                                 | REEP5                        | 0,809978941 | 860240000  |
| Phosphoglucomutase-1                                                                                                                    | PGM1                         | 0,809716599 | 373340000  |
| TBC1 domain family member 10B                                                                                                           | TBC1D10B                     | 0,809716599 | 199520000  |
| Nucleotide exchange factor SIL1                                                                                                         | SIL1                         | 0,80925791  | 130470000  |
| Receptor-type tyrosine-protein phosphatase C                                                                                            | PTPRC                        | 0,809126952 | 1227600000 |
| Leucine-rich PPR motif-containing protein, mitochondrial                                                                                | LRPPRC                       | 0,808472795 | 447960000  |
|                                                                                                                                         |                              | 0,808276754 | 271530000  |
| Lamin-B receptor                                                                                                                        | LBR                          | 0,808146113 | 107220000  |
| Pyruvate dehydrogenase protein X component, mitochondrial                                                                               | PDHX                         | 0,80795023  | 286890000  |
| Protein NipSnap homolog 2                                                                                                               | GBAS                         | 0,807363152 | 156180000  |
| Beta-galactosidase                                                                                                                      | GLB1                         | 0,807297974 | 973170000  |
| tRNA (guanine(26)-N(2))-dimethyltransferase                                                                                             | TRMT1;SEMA4B                 | 0,807167649 | 177100000  |
| ATP-dependent 6-phosphofructokinase, platelet type                                                                                      | PFKP                         | 0,807167649 | 871030000  |
| Hexokinase-3                                                                                                                            | HK3                          | 0,806711843 | 226040000  |
| Uncharacterized protein C2orf47, mitochondrial                                                                                          | C2orf47                      | 0,806126562 | 565400000  |
| NADH dehydrogenase [ubiquinone] iron-sulfur protein 3, mitochondrial                                                                    | NDUFS3;DKFZp586K0821         | 0,80567193  | 574880000  |
| Serine/arginine repetitive matrix protein 1                                                                                             | SRRM1                        | 0,80554213  | 850780000  |
| Glutamine--fructose-6-phosphate aminotransferase [isomerizing] 1                                                                        | GFPT1                        | 0,805347507 | 773120000  |
| Oxysterol-binding protein;Oxysterol-binding protein-related protein 8                                                                   | DKFZp686C0249;OSBPL8         | 0,804699445 | 135840000  |
| Serine/threonine-protein kinase D;Serine/threonine-protein kinase D2                                                                    | PRKD2                        | 0,804569957 | 675320000  |
| Long-chain-fatty-acid--CoA ligase 5                                                                                                     | ACSL5                        | 0,804246421 | 600850000  |
| Signal peptidase complex catalytic subunit SEC11A                                                                                       | SPC18;SEC11A                 | 0,803923145 | 605410000  |
| Mannose-1-phosphate guanyltransferase alpha                                                                                             | GMPPA                        | 0,803858521 | 100640000  |
| Peroxisomal multifunctional enzyme type 2;(3R)-hydroxyacyl-CoA dehydrogenase;Enoyl-CoA hydratase 2                                      | HSD17B4                      | 0,803406443 | 197740000  |
| Presequence protease, mitochondrial                                                                                                     | PITRM1                       | 0,803212851 | 267190000  |
| NADH-ubiquinone oxidoreductase 75 kDa subunit, mitochondrial                                                                            | NDUFS1                       | 0,802890405 | 520830000  |
| Dynamin-like 120 kDa protein, mitochondrial;Dynamin-like 120 kDa protein, form S1                                                       | OPA1                         | 0,80237503  | 787100000  |
| Glyoxylate reductase/hydroxypyruvate reductase                                                                                          | GRHPR                        | 0,802181935 | 104390000  |
| Long-chain-fatty-acid--CoA ligase 3                                                                                                     | ACSL3                        | 0,802053256 | 432680000  |
| NADH dehydrogenase [ubiquinone] iron-sulfur protein 2, mitochondrial                                                                    | NDUFS2                       | 0,801988933 | 478330000  |
| Inosine-5-monophosphate dehydrogenase;Inosine-5-monophosphate dehydrogenase 1                                                           | IMPDH;DKFZp781N0678;IMPDH1   | 0,801667468 | 788290000  |
| L-2-hydroxyglutarate dehydrogenase, mitochondrial                                                                                       | L2HGDH                       | 0,801474713 | 329940000  |
| Leucine-rich repeat and calponin homology domain-containing protein 4                                                                   | LRCH4                        | 0,801089482 | 38820000   |
| Monofunctional C1-tetrahydrofolate synthase, mitochondrial                                                                              | MTHFD1L                      | 0,8         | 144260000  |
|                                                                                                                                         | IARS                         | 0,79987202  | 141040000  |
| Pyruvate dehydrogenase E1 component subunit alpha, somatic form, mitochondrial;Pyruvate dehydrogenase E1 component PDHA1;PDHA1;LOC79064 |                              | 0,799680128 | 1227600000 |
| MICOS complex subunit MIC60                                                                                                             | IMMT                         | 0,799360512 | 653390000  |
| Bystin                                                                                                                                  | BYSL                         | 0,799232737 | 850710000  |
| Acyl-CoA dehydrogenase family member 9, mitochondrial                                                                                   | ACAD9                        | 0,798977309 | 882890000  |
|                                                                                                                                         | CNOT1                        | 0,798977309 | 681140000  |
| NADPH:adrenodoxin oxidoreductase, mitochondrial                                                                                         | FDXR                         | 0,798275724 | 515830000  |
| Elongation factor Tu, mitochondrial                                                                                                     | TUFM                         | 0,798148296 | 1137000000 |
| Purine nucleoside phosphorylase                                                                                                         | PNP                          | 0,797957229 | 534790000  |
| Protein FAM91A1                                                                                                                         | FAM91A1                      | 0,797829903 | 937610000  |
| Alpha-galactosidase A                                                                                                                   | GLA                          | 0,797384579 | 285220000  |
| Transmembrane protein 11, mitochondrial                                                                                                 | TMEM11                       | 0,797130331 | 152810000  |
| Protein disulfide-isomerase TMX3                                                                                                        | TMX3                         | 0,797130331 | 472840000  |
| NADH dehydrogenase [ubiquinone] iron-sulfur protein 8, mitochondrial                                                                    | NDUFS8                       | 0,797066794 | 167660000  |
| Dual specificity mitogen-activated protein kinase kinase 1                                                                              | MAP2K1                       | 0,797066794 | 1028100000 |
| Electron transfer flavoprotein subunit beta                                                                                             | ETF B                        | 0,796431985 | 1690600000 |
| Poly(A)-specific ribonuclease PARN                                                                                                      | PARN                         | 0,796431985 | 388020000  |
| Wiskott-Aldrich syndrome protein family member 1                                                                                        | WASF1                        | 0,795798186 | 170140000  |
| Mitochondrial import inner membrane translocase subunit TIM44                                                                           | TIMM44;hTIM44                | 0,795291872 | 134300000  |
| Biogenesis of lysosome-related organelles complex 1 subunit 3                                                                           | BLOC1S3                      | 0,795165394 | 590770000  |
|                                                                                                                                         | ACON                         | 0,794975753 | 720540000  |
|                                                                                                                                         | MRPL12                       | 0,794659886 | 187300000  |
| Growth arrest and DNA damage-inducible proteins-interacting protein 1                                                                   | GADD45GIP1                   | 0,79358781  | 253030000  |
| Actin-related protein 2/3 complex subunit 5;Actin-related protein 2/3 complex subunit 5-like protein                                    | ARPC5L                       | 0,793210121 | 258560000  |
| Succinate dehydrogenase [ubiquinone] cytochrome b small subunit, mitochondrial                                                          | UNQ5809;SDHD                 | 0,793021412 | 147930000  |
| NADH-ubiquinone oxidoreductase chain 5                                                                                                  | ND5                          | 0,792832792 | 178950000  |
| JmjC domain-containing protein 7                                                                                                        | JMJD7                        | 0,792581438 | 147380000  |
|                                                                                                                                         |                              | 0,792455821 | 121380000  |
| CDKN2AIP N-terminal-like protein                                                                                                        | CDKN2AIPNL                   | 0,792204706 | 128410000  |
| Coiled-coil domain-containing protein 88B                                                                                               | CCDC88B                      | 0,792141952 | 284720000  |
| Phospholipase DDHD2                                                                                                                     | DDHD2;TUBD1                  | 0,79195375  | 114560000  |
| Enoyl-CoA hydratase, mitochondrial                                                                                                      | ECHS1                        | 0,791139241 | 252170000  |
| Phosphoglycerate kinase                                                                                                                 |                              | 0,790951515 | 221970000  |
| Cytochrome c-type heme lyase                                                                                                            | DKFZp77911858;HCCS           | 0,790201501 | 105030000  |
| Dephospho-CoA kinase domain-containing protein                                                                                          | DCAKD                        | 0,78976465  | 613280000  |
| Annexin;Annexin A6                                                                                                                      | ANXA6                        | 0,789515238 | 501150000  |
| Ectopic P granules protein 5 homolog                                                                                                    | EPG5                         | 0,789515238 | 229760000  |
| Son of sevenless homolog 1                                                                                                              | SOS1                         | 0,789079145 | 784450000  |
| Peptidyl-prolyl cis-trans isomerase FKBP1A;Peptidyl-prolyl cis-trans isomerase                                                          | FKBP1A                       | 0,787773751 | 1535400000 |
| 28S ribosomal protein S29, mitochondrial                                                                                                | DAP3;MRPS29                  | 0,787401575 | 557580000  |
| Kynurenine--oxoglutarate transaminase 3                                                                                                 | hCG_23341;CCBL2              | 0,786905886 | 654780000  |
|                                                                                                                                         | HUWE1                        | 0,786534529 | 202250000  |
| Nicotinamide phosphoribosyltransferase                                                                                                  | NAMPT;NAMPTL                 | 0,785916378 | 286500000  |
| Histone H2B type 2-E;Histone H2B type 1-J;Histone H2B type 1-B;Histone H2B type 1-O;Histone H2B type 3-B                                | HIST2H2BE;HIST1H2BJ;HIST1H2B | 0,785422557 | 471870000  |
| N-acetyl-D-glucosamine kinase                                                                                                           | NAGK                         | 0,785175879 | 272370000  |
| NADPH--cytochrome P450 reductase                                                                                                        | DKFZp686G04235;POR           | 0,784436774 | 1198800000 |
| Isochorismatase domain-containing protein 2, mitochondrial                                                                              | ISOC2                        | 0,784375245 | 253840000  |
| Nucleoside diphosphate kinase;Nucleoside diphosphate kinase, mitochondrial                                                              | NME4                         | 0,784190715 | 892490000  |
| Cyclin-dependent kinase 6                                                                                                               | CDK6                         | 0,784129224 | 773400000  |
| NADH dehydrogenase [ubiquinone] 1 beta subcomplex subunit 8, mitochondrial                                                              | NDUFB8                       | 0,784006272 | 447840000  |
| Short-chain specific acyl-CoA dehydrogenase, mitochondrial                                                                              | ACADS                        | 0,78369906  | 295850000  |
| Transcription initiation factor TFIID subunit 5                                                                                         | TAIF5                        | 0,78235018  | 86260000   |
| Dihydropyrimidinase-related protein 2                                                                                                   | DPYSL2                       | 0,780640125 | 396740000  |
| Acyl-coenzyme A oxidase;Peroxisomal acyl-coenzyme A oxidase 1                                                                           | ACOX1                        | 0,779970361 | 199290000  |
| Triggering receptor expressed on myeloid cells 2                                                                                        | TREM2                        | 0,779970361 | 132040000  |
| 39S ribosomal protein L41, mitochondrial                                                                                                | MRPL41                       | 0,779362481 | 165580000  |

|                                                                                                                             |                          |             |             |
|-----------------------------------------------------------------------------------------------------------------------------|--------------------------|-------------|-------------|
| Prolactin regulatory element-binding protein                                                                                | PREB                     | 0,778937529 | 505030000   |
| 55 kDa erythrocyte membrane protein                                                                                         | MPP1                     | 0,778755549 | 604220000   |
| Acyl carrier protein, mitochondrial;Acyl carrier protein                                                                    | NDUFAB1                  | 0,777725929 | 227230000   |
| Cytochrome c                                                                                                                | CYCS                     | 0,776940409 | 848230000   |
| Retinoid-inducible serine carboxypeptidase                                                                                  | SCPEP1                   | 0,77579519  | 480270000   |
| NF-X1-type zinc finger protein NF-XL1                                                                                       | URCC5;NF-XL1             | 0,775434243 | 56244000    |
| Decaprenyl-diphosphate synthase subunit 2                                                                                   | PDS2                     | 0,774293457 | 19176000    |
| Mitochondrial import inner membrane translocase subunit TIM14                                                               | DNAJC19                  | 0,773754256 | 200800000   |
| DENN domain-containing protein 2D                                                                                           | DENND2D                  | 0,772678102 | 30387000    |
| Lanosterol synthase                                                                                                         | LSS                      | 0,772379702 | 78659000    |
| Aldehyde dehydrogenase, mitochondrial                                                                                       | ALDH2                    | 0,772320049 | 11239000000 |
| Coronin-1A;Coronin                                                                                                          | CORO1A                   | 0,772081532 | 30336000000 |
| NADH dehydrogenase [ubiquinone] 1 alpha subcomplex subunit 7                                                                | NDUFA7                   | 0,771128933 | 250220000   |
| Acetyl-CoA acetyltransferase, mitochondrial                                                                                 | ACAT1                    | 0,771069473 | 2481700000  |
| Serine hydroxymethyltransferase;Serine hydroxymethyltransferase, mitochondrial                                              | SHMT2;DKFZp686P09201     | 0,770297335 | 44889000000 |
| Helicase ARIP4                                                                                                              | RAD54L2                  | 0,768462307 | 40850000    |
| Core-binding factor subunit beta                                                                                            | CBFB                     | 0,76810815  | 331070000   |
| ATPase family AAA domain-containing protein 3A;ATPase family AAA domain-containing protein 3B                               | ATAD3A;ATAD3B            | 0,76799017  | 1824700000  |
| Serine palmitoyltransferase 1                                                                                               | SPTLC1                   | 0,767931193 | 169610000   |
| 39S ribosomal protein L15, mitochondrial                                                                                    | MRPL15                   | 0,767106474 | 579500000   |
| RAS guanyl-releasing protein 2                                                                                              | RASGRP2                  | 0,766812361 | 35140000    |
| Signal transducer and activator of transcription 1-alpha/beta;Signal transducer and activator of transcription              | STAT1                    | 0,766812361 | 2711400000  |
| Coiled-coil domain-containing protein 58                                                                                    | CCDC58                   | 0,766577233 | 2920900000  |
| Mitochondrial Rho GTPase 2                                                                                                  | RHOT2                    | 0,76581406  | 221220000   |
| 39S ribosomal protein L20, mitochondrial                                                                                    | MRPL20                   | 0,765755418 | 170490000   |
| L-lactate dehydrogenase;L-lactate dehydrogenase A chain                                                                     | LDHA                     | 0,765345171 | 1,1128E+11  |
| Acetyltransferase component of pyruvate dehydrogenase complex;Dihydropyridyllysine-residue acetyltransferase component      | DLAT                     | 0,765169485 | 2123700000  |
| E3 ubiquitin-protein ligase MYCBP2                                                                                          | MYCBP2                   | 0,765110941 | 1544300000  |
| Peroxiredoxin-5, mitochondrial                                                                                              | PRDX5                    | 0,764117063 | 12444000000 |
| ATP-dependent Clp protease proteolytic subunit, mitochondrial;ATP-dependent Clp protease proteolytic subunit                | CLPP                     | 0,763358779 | 2396400000  |
| DnaJ homolog subfamily C member 10                                                                                          | DNAJC10                  | 0,762660159 | 664570000   |
| Histone deacetylase 10                                                                                                      | HDAC10                   | 0,761730652 | 68456000    |
| Hexokinase-1                                                                                                                | HK1                      | 0,760340633 | 7009300000  |
| Methylglutaconyl-CoA hydratase, mitochondrial                                                                               | AUH                      | 0,759705234 | 370270000   |
| Sodium bicarbonate cotransporter 3                                                                                          | SLC4A7                   | 0,7583801   | 386190000   |
| Aconitate hydratase, mitochondrial                                                                                          | ACO2                     | 0,758150114 | 2892300000  |
| Methylosome protein 50                                                                                                      | WDR77                    | 0,758035173 | 750980000   |
| Poly(rC)-binding protein 4                                                                                                  | PCBP4                    | 0,757346259 | 44920000    |
| Short/branched chain specific acyl-CoA dehydrogenase, mitochondrial                                                         | ACADSB                   | 0,75694497  | 1204200000  |
| Plastin-2                                                                                                                   | LCP1                     | 0,755629439 | 75843000000 |
| BCL2/adenovirus E1B 19 kDa protein-interacting protein 3-like                                                               | BNIP3L                   | 0,755458185 | 100300000   |
| Aldo-keto reductase family 1 member C2                                                                                      | AKR1C2                   | 0,753352418 | 2874100000  |
| 2,4-dienoyl-CoA reductase, mitochondrial                                                                                    | DECR1;DECR               | 0,753068755 | 728250000   |
| NADH dehydrogenase [ubiquinone] 1 alpha subcomplex subunit 9, mitochondrial                                                 | NDUFA9                   | 0,752445448 | 1386400000  |
| Mitochondrial fission regulator 1-like                                                                                      | MTRF1L                   | 0,752162467 | 75565000    |
| Adenylate kinase isoenzyme 1                                                                                                | AK1                      | 0,752105897 | 1271500000  |
| cAMP-dependent protein kinase type I-alpha regulatory subunit;cAMP-dependent protein kinase type I-alpha regulatory subunit | DKFZp779L0468;PRKAR1A    | 0,751653638 | 6405800000  |
| GRB2-associated-binding protein 2                                                                                           | GAB2                     | 0,751653638 | 25953000    |
|                                                                                                                             |                          | 0,751258358 | 107030000   |
| ATP-dependent 6-phosphofructokinase, muscle type                                                                            | PFKM                     | 0,748559024 | 7995400000  |
| Caspase-8;Caspase-8 subunit p18;Caspase-8 subunit p10                                                                       | CASP8                    | 0,747831289 | 52540000    |
| Pyrrroline-5-carboxylate reductase 2;Pyrrroline-5-carboxylate reductase                                                     | PYCR2;P5CR2;DKFZp434J218 | 0,746770219 | 2875500000  |
| Cob(II)yrinic acid a,c-diamide adenosyltransferase, mitochondrial                                                           | MMAB                     | 0,744878957 | 125630000   |
| 1,2-dihydroxy-3-keto-5-methylthiopentene dioxygenase                                                                        | ADI1                     | 0,744878957 | 474190000   |
| Acid ceramidase;Acid ceramidase subunit alpha;Acid ceramidase subunit beta                                                  | ASAH1                    | 0,744657085 | 231980000   |
| Nucleolar protein 6                                                                                                         | NOL6                     | 0,744213738 | 52482000    |
| Transmembrane protein 160                                                                                                   | TMEM160                  | 0,743660296 | 198890000   |
| Bis(5-adenosyl)-triphosphatase                                                                                              | FHIT                     | 0,743273376 | 311530000   |
| Coronin-7;Coronin                                                                                                           | CORO7;hCG_1787779        | 0,743107676 | 2074600000  |
| Tricarboxylate transport protein, mitochondrial                                                                             | SLC25A1                  | 0,742611102 | 7809600000  |
| Chloride intracellular channel protein 5;Chloride intracellular channel protein 6                                           | CLIC5;CLIC6              | 0,742004897 | 40985000    |
| Signal-induced proliferation-associated protein 1                                                                           | SIPA1                    | 0,741729714 | 703880000   |
| Protein FAM65A                                                                                                              | FAM65A                   | 0,741564702 | 118210000   |
| Protein S100-A4                                                                                                             | S100A4                   | 0,741234897 | 1150100000  |
| Endoplasmic reticulum-Golgi intermediate compartment protein 1                                                              | ERGIC1                   | 0,738497895 | 4956500000  |
| 39S ribosomal protein L21, mitochondrial                                                                                    | MRPL21                   | 0,73806185  | 445440000   |
| AFG3-like protein 2                                                                                                         | AFG3L2                   | 0,737735153 | 1526300000  |
| 3-hydroxyisobutyrate dehydrogenase, mitochondrial                                                                           | HIBADH                   | 0,736756797 | 1954200000  |
| Inositol monophosphatase 3                                                                                                  | IMPAD1                   | 0,735510444 | 23837000    |
| Microtubule-associated protein 1S;MAP1S heavy chain;MAP1S light chain                                                       | MAP1S                    | 0,735240056 | 139320000   |
| Ras-related protein R-Ras                                                                                                   | RRAS                     | 0,735023888 | 184030000   |
| Phosphoglycerate mutase;Phosphoglycerate mutase 1                                                                           | PGAM1                    | 0,735023888 | 1,5888E+11  |
| von Willebrand factor A domain-containing protein 8                                                                         | VWA8                     | 0,734537976 | 170030000   |
| Pyrrroline-5-carboxylate reductase;Pyrrroline-5-carboxylate reductase 1, mitochondrial                                      | PYCR1;PIG45              | 0,733514267 | 4714700000  |
| Rho GTPase-activating protein 4                                                                                             | ARGHAP4;C1               | 0,732600733 | 306390000   |
| Beta-enolase;Enolase                                                                                                        | ENO3                     | 0,732118017 | 37260000000 |
| Ras-related protein Rab-3A                                                                                                  | RAB3A                    | 0,731582413 | 79791000    |
| TOM1-like protein 1                                                                                                         | TOM1L1                   | 0,729680708 | 28210000    |
| ATP-dependent 6-phosphofructokinase, liver type                                                                             | PFKL                     | 0,728438228 | 4025700000  |
| Inositol 1,4,5-trisphosphate receptor type 2                                                                                | ITPR2                    | 0,72663857  | 1052100000  |
| Zinc finger protein-like 1                                                                                                  | ZFP1                     | 0,726480203 | 94178000    |
| Phosphorylase b kinase regulatory subunit alpha, liver isoform                                                              | PHKA2                    | 0,725320955 | 34046000    |
| Carbonic anhydrase 13                                                                                                       | CA13                     | 0,725215752 | 204840000   |
| Clathrin heavy chain 2                                                                                                      | CLTCL1                   | 0,724847782 | 1940000000  |
| Methylcrotonoyl-CoA carboxylase beta chain, mitochondrial                                                                   | MCCC2                    | 0,724112962 | 91198000    |
| FCH domain only protein 1                                                                                                   | FCHO1                    | 0,722752241 | 55731000    |
| Protein SZT2                                                                                                                | SZT2                     | 0,721396624 | 32800000    |
| Very-long-chain enoyl-CoA reductase                                                                                         | TECR                     | 0,720928556 | 408620000   |
| DNA polymerase delta subunit 3                                                                                              | POLD3                    | 0,720253529 | 529920000   |
| 28S ribosomal protein S16, mitochondrial                                                                                    | MRPS16                   | 0,719579765 | 507060000   |
| Serine/threonine-protein kinase/endoribonuclease IRE1;Serine/threonine-protein kinase;Endoribonuclease                      | ERN1                     | 0,717978173 | 104630000   |
| Ras-related protein Rab-24                                                                                                  | RAB24                    | 0,71751453  | 1004000000  |
| Protein UXT                                                                                                                 | UXT                      | 0,717102904 | 154640000   |
| Mitochondrial import inner membrane translocase subunit Tim8 B                                                              | TIMM8B                   | 0,71653769  | 147830000   |
| 39S ribosomal protein L23, mitochondrial                                                                                    | MRPL23                   | 0,716281069 | 257280000   |
| Protein canopy homolog 4                                                                                                    | CNPY4                    | 0,715461115 | 641100000   |
| Valine-tRNA ligase, mitochondrial                                                                                           | VARS2                    | 0,714234698 | 46749000    |
| 39S ribosomal protein L28, mitochondrial                                                                                    | MRPL28                   | 0,713623064 | 260930000   |
| Nephrocystin-4                                                                                                              | NPHP4                    | 0,713623064 | 76097000    |
| LETM1 domain-containing protein 1                                                                                           | LETMD1                   | 0,71347032  | 317550000   |
| Succinyl-CoA ligase [GDP-forming] subunit beta, mitochondrial                                                               | SUCLG2                   | 0,71331764  | 4740000000  |
| Septin-9                                                                                                                    |                          | 0,712961643 | 12487000000 |
| Putative RNA-binding protein 15                                                                                             | RBM15                    | 0,712707576 | 8427100     |
| Hexokinase-2                                                                                                                | HK2;DKFZp686M1669        | 0,712301446 | 12048000000 |
| Ribosome production factor 2 homolog                                                                                        | RPF2                     | 0,710883628 | 102550000   |
| 28S ribosomal protein S12, mitochondrial                                                                                    | MRPS12                   | 0,709622481 | 185800000   |
| E3 ubiquitin-protein ligase RBBP6                                                                                           | RBBP6                    | 0,708315625 | 39818000    |
| Mitochondrial chaperone BCS1L                                                                                               | BCS1L                    | 0,707163567 | 256350000   |

|                                                                                                                                                                                         |                               |              |            |
|-----------------------------------------------------------------------------------------------------------------------------------------------------------------------------------------|-------------------------------|--------------|------------|
| Glycerol-3-phosphate dehydrogenase [NAD(+)], cytoplasmic                                                                                                                                | GPD1                          | 0,707063565  | 37393000   |
| Glyceraldehyde-3-phosphate dehydrogenase, testis-specific                                                                                                                               | GAPDHS                        | 0,706963591  | 755610000  |
| Fatty acid desaturase 1                                                                                                                                                                 | FADS1                         | 0,704771302  | 60329000   |
| DmX-like protein 1                                                                                                                                                                      | DMXL1                         | 0,703828829  | 55370000   |
| Mitochondrial import receptor subunit TOM40B                                                                                                                                            | TOMM40L                       | 0,703531729  | 413490000  |
| Fumarylacetoacetate hydrolase domain-containing protein 2A;Fumarylacetoacetate hydrolase domain-containing protein 2B                                                                   | FAHD2A;FAHD2B                 | 0,701114772  | 49765000   |
| Regulator of microtubule dynamics protein 1                                                                                                                                             | RMDN1                         | 0,701016474  | 110690000  |
| ALS2 C-terminal-like protein                                                                                                                                                            | FLJ00189;ALS2CL               | 0,697885407  | 42407000   |
| Nucleoredoxin                                                                                                                                                                           | NXN                           | 0,697398703  | 38335000   |
| PRA1 family protein 2                                                                                                                                                                   | PRAF2                         | 0,697204211  | 190650000  |
| O-acetyl-ADP-ribose deacetylase MACROD1                                                                                                                                                 | MACROD1                       | 0,697107006  | 206580000  |
| Dehydrogenase/reductase SDR family member 7B                                                                                                                                            | DHRS7B                        | 0,696621386  | 243530000  |
| Iron-sulfur cluster co-chaperone protein HscB, mitochondrial                                                                                                                            | HSCB                          | 0,695894224  | 178730000  |
| Protein NipSnap homolog 1                                                                                                                                                               | NIPSNAP1                      | 0,694396222  | 675120000  |
| General transcription factor 3C polypeptide 2                                                                                                                                           | GTF3C2                        | 0,694010688  | 16916000   |
| NADH dehydrogenase [ubiquinone] 1 alpha subcomplex subunit 11                                                                                                                           | NDUFA11                       | 0,692568737  | 49773000   |
| Phosphatidylinositol 3,4,5-trisphosphate 5-phosphatase 1                                                                                                                                | INPP5D                        | 0,691515111  | 996770000  |
| NADH dehydrogenase [ubiquinone] 1 alpha subcomplex assembly factor 3                                                                                                                    | DKFZp564J0123;C3orf60;NDUFAF  | 0,689132382  | 31266000   |
| E3 ubiquitin-protein ligase HACE1                                                                                                                                                       | HACE1                         | 0,688989941  | 27367000   |
| 28S ribosomal protein S10, mitochondrial                                                                                                                                                | MRPS10                        | 0,688847558  | 256250000  |
| Neuroguidin                                                                                                                                                                             | NGDN                          | 0,688657806  | 151950000  |
| 39S ribosomal protein L49, mitochondrial                                                                                                                                                | MRPL49                        | 0,687190764  | 164680000  |
| Proteasome subunit beta type;Proteasome subunit beta type-9                                                                                                                             | PSMB9                         | 0,686766019  | 128090000  |
| 39S ribosomal protein L2, mitochondrial                                                                                                                                                 | MRPL2                         | 0,686624554  | 241030000  |
| 28S ribosomal protein S28, mitochondrial                                                                                                                                                | MRPS28                        | 0,686436024  | 147300000  |
| Phosphatidylinositol 4,5-bisphosphate 3-kinase catalytic subunit gamma isoform                                                                                                          | PIK3CG                        | 0,681431005  | 1366200000 |
| Apoptosis regulator Bcl-2                                                                                                                                                               | bcl-2;BCL2                    | 0,681338148  | 100020000  |
| Isocitrate dehydrogenase [NADP], mitochondrial;Isocitrate dehydrogenase [NADP]                                                                                                          | IDH2                          | 0,67999456   | 1702100000 |
| HLA class I histocompatibility antigen, alpha chain E;HLA class I histocompatibility antigen, B-38 alpha chain;HLA class I histocompatibility antigen, alpha chain E                    | HLA-B;HLA-C;HLA-A;HLA-E;HLA-C | 0,674763833  | 243730000  |
| Alpha-ketoglutarate-dependent dioxygenase alkB homolog 3                                                                                                                                | ALKBH3                        | 0,670106547  | 217850000  |
| Diablo homolog, mitochondrial                                                                                                                                                           | DIABLO                        | 0,66983723   | 344110000  |
| RNA demethylase ALKBH5                                                                                                                                                                  | ALKBH5                        | 0,669747505  | 188290000  |
| Propionyl-CoA carboxylase beta chain, mitochondrial                                                                                                                                     | PCCB;DKFZp451E113             | 0,668583272  | 104050000  |
| Nucleoside diphosphate kinase;Nucleoside diphosphate kinase 6                                                                                                                           | NME6                          | 0,664672649  | 20660000   |
| 28S ribosomal protein S34, mitochondrial                                                                                                                                                | MRPS34                        | 0,660283922  | 124620000  |
| 28S ribosomal protein S9, mitochondrial                                                                                                                                                 | MRPS9                         | 0,659804698  | 846440000  |
| 28S ribosomal protein S22, mitochondrial                                                                                                                                                | MRPS22                        | 0,65802461   | 313090000  |
| 28S ribosomal protein S25, mitochondrial                                                                                                                                                | MRPS25                        | 0,657764915  | 491180000  |
| Adseverin                                                                                                                                                                               | SCIN                          | 0,656340247  | 335230000  |
| [Pyruvate dehydrogenase (acetyl-transferring)] kinase isozyme 3, mitochondrial                                                                                                          | PDK3                          | 0,653125204  | 1820400000 |
| Tyrosine-protein phosphatase non-receptor type 9                                                                                                                                        | PTPN9                         | 0,651635605  | 320500000  |
| Receptor-type tyrosine-protein phosphatase;Receptor-type tyrosine-protein phosphatase epsilon                                                                                           | PTPRE                         | 0,648340249  | 499240000  |
| 28S ribosomal protein S35, mitochondrial                                                                                                                                                | MRPS35                        | 0,647123536  | 268080000  |
| Protein FAM162A                                                                                                                                                                         | FAM162A                       | 0,646746863  | 440020000  |
| Cyclin-dependent kinase 4 inhibitor C                                                                                                                                                   | CDKN2C                        | 0,646579594  | 333640000  |
| Transient receptor potential cation channel subfamily V member 2                                                                                                                        | TRPV2                         | 0,645411127  | 124350000  |
| Antigen peptide transporter 1                                                                                                                                                           | TAP1                          | 0,64441294   | 25279000   |
| Alanine aminotransferase 2                                                                                                                                                              | GPT2                          | 0,643666323  | 670080000  |
| Advillin                                                                                                                                                                                | AVIL                          | 0,640040963  | 541970000  |
| Protein diaphanous homolog 2                                                                                                                                                            | DIAPH2                        | 0,638496722  | 117910000  |
| Coiled-coil-helix-coiled-coil-helix domain-containing protein 7                                                                                                                         | CHCHD7                        | 0,636415707  | 24394000   |
| ATP synthase subunit delta, mitochondrial                                                                                                                                               | ATP5D                         | 0,636213259  | 409450000  |
| Ral GTPase-activating protein subunit alpha-2                                                                                                                                           | RALGAPA2;hCG_22457            | 0,6350404753 | 245420000  |
| Adenylate kinase 4, mitochondrial                                                                                                                                                       | AK4                           | 0,632471064  | 835550000  |
| Pyruvate carboxylase, mitochondrial                                                                                                                                                     | PC                            | 0,630954634  | 6191800000 |
| Proline dehydrogenase 1, mitochondrial                                                                                                                                                  | PRODH                         | 0,628930818  | 428760000  |
| Threonine--tRNA ligase, mitochondrial                                                                                                                                                   | TARS2                         | 0,627706986  | 357460000  |
| DNA repair protein XRCC1                                                                                                                                                                | XRCC1;FOXH1                   | 0,627352572  | 166690000  |
| Protein enabled homolog                                                                                                                                                                 | ENAH                          | 0,627234523  | 963040000  |
| Ribonucleoside-diphosphate reductase subunit M2;Ribonucleoside-diphosphate reductase subunit M2 B                                                                                       | RRM2;hCG_23833;DKFZp686M052   | 0,620116582  | 106560000  |
| Probable inactive tRNA-specific adenosine deaminase-like protein 3                                                                                                                      | hCG_22695;ADAT3               | 0,617932398  | 35527000   |
|                                                                                                                                                                                         | SMCR7L                        | 0,611620795  | 30689000   |
| 39S ribosomal protein L24, mitochondrial                                                                                                                                                | MRPL24                        | 0,607718019  | 444170000  |
| Isobutyryl-CoA dehydrogenase, mitochondrial                                                                                                                                             | ACAD8                         | 0,606980273  | 203970000  |
| Propionyl-CoA carboxylase alpha chain, mitochondrial                                                                                                                                    | PCCA                          | 0,602518527  | 177000000  |
| Phosphoenolpyruvate carboxykinase [GTP], mitochondrial                                                                                                                                  | PCK2                          | 0,598515681  | 485580000  |
| Phosphotriesterase-related protein                                                                                                                                                      | PTER                          | 0,594777785  | 298090000  |
| Mitogen-activated protein kinase kinase kinase 2;Mitogen-activated protein kinase kinase kinase 3                                                                                       | MAP3K2;MAP3K3                 | 0,592592593  | 53431000   |
| ATP synthase mitochondrial F1 complex assembly factor 2                                                                                                                                 | ATPAF2                        | 0,588685465  | 475830000  |
| Ribosome biogenesis protein BMS1 homolog                                                                                                                                                | BMS1                          | 0,58844298   | 17105000   |
| E3 ubiquitin-protein ligase RNF31                                                                                                                                                       | RNF31                         | 0,584692744  | 51772000   |
| Proteasome subunit beta type;Proteasome subunit beta type-10                                                                                                                            | PSMB10                        | 0,583226408  | 113280000  |
| MDS1 and EVI1 complex locus protein EVI1;PR domain zinc finger protein 16                                                                                                               | EVI1;MECOM;PRDM16             | 0,58281851   | 113350000  |
| Probable ATP-dependent RNA helicase DDX58                                                                                                                                               | DDX58                         | 0,581598232  | 718610000  |
| 28S ribosomal protein S23, mitochondrial                                                                                                                                                | MRPS23                        | 0,581462961  | 280360000  |
| Glucosylceramidase                                                                                                                                                                      | GBA                           | 0,577433884  | 27647000   |
| Interferon-induced transmembrane protein 1;Interferon-induced transmembrane protein 2;Interferon-induced transmembrane protein 3                                                        | IFITM2;IFITM3;IFITM1          | 0,576934172  | 509570000  |
| Acetyl-coenzyme A transporter 1                                                                                                                                                         | SLC33A1                       | 0,574844792  | 198460000  |
| HIG1 domain family member 1A, mitochondrial;HIG1 domain family member 1C                                                                                                                | HIGD1A;HIGD1C                 | 0,572672088  | 15530000   |
| Epimerase family protein SDR39U1                                                                                                                                                        | SDR39U1                       | 0,571102227  | 49903000   |
| TATA element modulatory factor                                                                                                                                                          | TMF1                          | 0,568698817  | 159460000  |
| Lon protease homolog, mitochondrial;Lon protease homolog                                                                                                                                | LONP1                         | 0,567923671  | 849180000  |
| Lon protease homolog, mitochondrial                                                                                                                                                     | LONP1                         | 0,564748405  | 4207900000 |
| Putative tyrosine-protein phosphatase auxilin                                                                                                                                           | DNAJC6                        | 0,558378469  | 428430000  |
| Methionine synthase                                                                                                                                                                     | MTR;DKFZp686A22123            | 0,556637907  | 21504000   |
| Protein tweety homolog 3                                                                                                                                                                | TTYH3                         | 0,555740802  | 14713000   |
| Glycogenin-1                                                                                                                                                                            | GYG1                          | 0,547705116  | 72147000   |
| Glycogenin-2                                                                                                                                                                            | GYG2                          | 0,543183053  | 159550000  |
| [Pyruvate dehydrogenase (acetyl-transferring)] kinase isozyme 1, mitochondrial                                                                                                          | PDK1                          | 0,537056928  | 35095000   |
| Leukocyte receptor cluster member 8                                                                                                                                                     | LENG8                         | 0,531914894  | 61923000   |
| Phosphatidylinositol 3,4,5-trisphosphate 3-phosphatase and dual-specificity protein phosphatase PTEN                                                                                    | PTEN;PTHD                     | 0,531180283  | 113490000  |
| Glutamine synthetase                                                                                                                                                                    | PIG59;GLUL                    | 0,526011257  | 131610000  |
| Tyrosine-protein kinase receptor;Insulin-like growth factor 1 receptor;Insulin-like growth factor 1 receptor alpha chain;Insulin IGF1R                                                  |                               | 0,517491203  | 170180000  |
| DNA-directed RNA polymerase                                                                                                                                                             |                               | 0,515012618  | 33765000   |
| Dual specificity tyrosine-phosphorylation-regulated kinase 1A;Dual specificity tyrosine-phosphorylation-regulated kinase 1B                                                             | DYRK1A;DYRK1B                 | 0,514827018  | 116670000  |
| Protein-glutamine gamma-glutamyltransferase E;Protein-glutamine gamma-glutamyltransferase E 50 kDa catalytic chain;Protein-glutamine gamma-glutamyltransferase E 50 kDa catalytic chain | TGM3                          | 0,511796919  | 66407000   |
| Prolyl 4-hydroxylase subunit alpha-1                                                                                                                                                    | P4HA1                         | 0,511378164  | 17083000   |
| Estradiol 17-beta-dehydrogenase 8                                                                                                                                                       | HSD17B8                       | 0,509580106  | 177320000  |
| Probable phospholipid-transporting ATPase IF                                                                                                                                            | ATP11B                        | 0,492829333  | 29112000   |
| Protein phosphatase 1B                                                                                                                                                                  | PPM1B                         | 0,489141068  | 63300000   |
| Neuroplastin                                                                                                                                                                            | DKFZp566H1924;NPTN            | 0,483185157  | 250410000  |
| Pescadillo homolog                                                                                                                                                                      | PES1                          | 0,479800403  | 177620000  |
| Napsin-A                                                                                                                                                                                | NAPSA                         | 0,467420772  | 118800000  |
| 2-5-oligoadenylate synthase 3                                                                                                                                                           | OAS3                          | 0,453967678  | 169650000  |
| Ig alpha-1 chain C region;Ig alpha-2 chain C region                                                                                                                                     | SNC73;DKFZp686G21220;DKFZp6   | 0,44780798   | 95591000   |
| Protein RIC1 homolog                                                                                                                                                                    | KIAA1432                      | 0,428210508  | 14087000   |
|                                                                                                                                                                                         | ZNF551                        | 0,426730392  | 41329000   |
| Protein SMG5                                                                                                                                                                            | SMG5                          | 0,42073376   | 10476000   |

|                                                                                                                             |                                    |             |            |
|-----------------------------------------------------------------------------------------------------------------------------|------------------------------------|-------------|------------|
| Eukaryotic translation initiation factor 2-alpha kinase 4                                                                   | EIF2AK4                            | 0,386847195 | 22039000   |
| Tetraspanin-14                                                                                                              | TSPAN14                            | 0,354459095 | 214980000  |
| Mitochondrial pyruvate carrier 1                                                                                            | BRP44L;MPC1                        | 0,35180299  | 759610000  |
| Actin-related protein 3B;Actin-related protein 3C                                                                           | ACTR3B;ACTR3C                      | 0,31201248  | 366210000  |
|                                                                                                                             | SLC12A1                            | 0,274642278 | 406460000  |
| Trimethyllysine dioxygenase, mitochondrial                                                                                  | TMLHE                              | 0,27000027  | 54399000   |
| Protein piccolo                                                                                                             | LOC392742;PCLO                     |             | 480070000  |
| Neutrophil defensin 3;HP 3-56;Neutrophil defensin 2;Neutrophil defensin 1;HP 1-56;Neutrophil defensin 2                     | DEF3;DEFA1                         | 0,121756706 | 200711000  |
| Ig kappa chain C region                                                                                                     | IGK@;IGKC                          |             | 7789700    |
| Cystatin-A;Cystatin-A, N-terminally processed                                                                               | CSTA                               |             | 129420000  |
| Prolactin-inducible protein                                                                                                 | PIP                                |             | 150950000  |
| Lipocalin-1;Putative lipocalin 1-like protein 1                                                                             | LCN1;LCN1P1                        |             | 71785000   |
| Galectin-7                                                                                                                  | LGALS7                             |             | 9488500    |
| FYVE, RhoGEF and PH domain-containing protein 2                                                                             | FGD2                               |             | 15323000   |
| Histone deacetylase 6                                                                                                       | DKFZp566E044;HDAC6                 |             | 42810000   |
| Myelin-associated neurite-outgrowth inhibitor                                                                               | FAM168B                            |             | 12583000   |
| Breast cancer type 2 susceptibility protein                                                                                 | BRCA2                              |             | 0          |
| GRIP and coiled-coil domain-containing protein 1                                                                            | GCC1                               |             | 5840700    |
| 40S ribosomal protein S27                                                                                                   | LOC392748                          |             | 112600000  |
| N-alpha-acetyltransferase 16, NatA auxiliary subunit                                                                        | NARG1L;NAA16                       |             | 13354000   |
| CCR4-NOT transcription complex subunit 1                                                                                    | CNOT1                              |             | 18959000   |
| Intraflagellar transport protein 25 homolog                                                                                 | HSPB11                             |             | 10087000   |
| Alpha-endosulfine                                                                                                           | ENSA                               |             | 10023000   |
|                                                                                                                             | PPP2R4                             |             | 0          |
| Calcium-transporting ATPase                                                                                                 | ATP2B4                             |             | 12580000   |
| Abhydrolase domain-containing protein 16A                                                                                   | BAT5;ABHD16A                       |             | 5113200    |
| Receptor-type tyrosine-protein phosphatase O                                                                                | PTPRO                              |             | 26926000   |
| Probable G-protein coupled receptor 63                                                                                      | GPR63                              |             | 9607900    |
| WW domain-containing oxidoreductase                                                                                         | WVVOX                              |             | 18773000   |
|                                                                                                                             |                                    |             | 8731300    |
| Protein FAN                                                                                                                 | NSMAF                              |             | 29190000   |
| Leucine-rich repeat flightless-interacting protein 2                                                                        | LRRFIP2                            |             | 14003000   |
| Alcohol dehydrogenase 1B;Alcohol dehydrogenase 1A;Alcohol dehydrogenase 1C                                                  | ADH1B;ADH1A;ADH1C                  |             | 49635000   |
| tRNA-splicing endonuclease subunit Sen15                                                                                    | C1orf19;TSEN15                     |             | 32063000   |
| Cell division cycle-associated protein 3                                                                                    | CDCA3                              |             | 0          |
|                                                                                                                             |                                    |             | 0          |
| Protein kinase C eta type;Protein kinase C epsilon type                                                                     | PRKCH;PRKCE                        |             | 30338000   |
| Keratin, type I cytoskeletal 18                                                                                             | KRT18                              |             | 9418300    |
|                                                                                                                             |                                    |             | 9887800    |
| Spectrin beta chain, erythrocytic                                                                                           | SPTB                               |             | 32064000   |
| Protein FAM133B                                                                                                             | FAM133B;MGC40405                   |             | 30970000   |
| Uncharacterized protein KIAA2013                                                                                            | LOC728138;KIAA2013                 |             | 11857000   |
|                                                                                                                             |                                    |             | 8095800    |
| F-box only protein 4                                                                                                        | FBXO4                              |             | 17798000   |
| G1/S-specific cyclin-D3                                                                                                     | CCND3                              |             | 17856000   |
| Low density lipoprotein receptor adapter protein 1                                                                          | LDLRAP1                            |             | 33013000   |
| Dedicator of cytokinesis protein 7                                                                                          | DOCK7                              |             | 0          |
| Volume-regulated anion channel subunit LRRC8D                                                                               | DKFZp666L2010;DKFZp54710910;LRRC8D |             | 3051000    |
| Succinyl-CoA:3-ketoacid-coenzyme A transferase;Succinyl-CoA:3-ketoacid coenzyme A transferase 2, mitochondrial              | OXC2                               |             | 32532000   |
| Branched-chain-amino-acid aminotransferase;Branched-chain-amino-acid aminotransferase, mitochondrial                        | BCAT2                              |             | 4333900    |
|                                                                                                                             | RGS20                              |             | 24488000   |
| MAP kinase-interacting serine/threonine-protein kinase 1                                                                    | MKNK1;DKFZp686E14208               |             | 0          |
|                                                                                                                             |                                    |             | 41992000   |
| Leucine-rich repeat-containing protein 15                                                                                   | LRRC15                             |             | 119860000  |
| Dedicator of cytokinesis protein 9                                                                                          | DOCK9;DKFZp686N04132               |             | 60947000   |
| Serine/threonine-protein kinase 3;Serine/threonine-protein kinase 3 36kDa subunit;Serine/threonine-protein kinase 3 20kDa s | STK3                               |             | 0          |
|                                                                                                                             |                                    |             | 1992400    |
|                                                                                                                             |                                    |             | 18351000   |
| GRAM domain-containing protein 1C                                                                                           | GRAMD1C                            |             | 0          |
| WD repeat and SOCS box-containing protein 1                                                                                 | WSB1                               |             | 10132000   |
|                                                                                                                             |                                    |             | 0          |
| Methylcrotonoyl-CoA carboxylase subunit alpha, mitochondrial                                                                | MCCC1;DKFZp686B20267               |             | 7712000    |
| Hypoxia-inducible factor 1-alpha inhibitor                                                                                  | HIF1AN                             |             | 20960000   |
|                                                                                                                             |                                    |             | 17126000   |
| Protein phosphatase Slingshot homolog 2                                                                                     | SSH2                               |             | 9609800    |
| Oxysterol-binding protein;Oxysterol-binding protein 2                                                                       | OSBP2                              |             | 16321000   |
| ATP synthase subunit gamma;ATP synthase subunit gamma, mitochondrial                                                        | ATP5C1                             |             | 0          |
| Beta-1,4-galactosyltransferase 1;Lactose synthase A protein;N-acetyllactosamine synthase;Beta-N-acetylglucosaminylgly       | B4GALT1                            |             | 6200400    |
| Semaphorin-3E                                                                                                               | SEMA3E                             |             | 3140400    |
|                                                                                                                             |                                    |             | 84362000   |
| Ribonucleoside-diphosphate reductase;Ribonucleoside-diphosphate reductase large subunit                                     | RRM1                               |             | 9775800    |
|                                                                                                                             |                                    |             | 8844200    |
|                                                                                                                             |                                    |             | 12949000   |
| Collagen alpha-1(VI) chain                                                                                                  | COL6A1                             |             | 0          |
|                                                                                                                             |                                    |             | 4972800    |
| Glyceraldehyde-3-phosphate dehydrogenase                                                                                    |                                    |             | 0          |
|                                                                                                                             |                                    |             | 73820000   |
| Myocilin;Myocilin, N-terminal fragment;Myocilin, C-terminal fragment                                                        | MYOC                               |             | 64972000   |
|                                                                                                                             |                                    |             | 48921000   |
| Erythrocyte band 7 integral membrane protein                                                                                | STOM                               |             | 19534000   |
| Myosin light chain 6B                                                                                                       | MYL6B                              |             | 8243800    |
| Zinc finger protein 346                                                                                                     | ZNF346                             |             | 17980000   |
|                                                                                                                             |                                    |             | 240690000  |
| Exostosin-2                                                                                                                 | EXT2                               |             | 4846900    |
|                                                                                                                             |                                    |             | 5412200000 |
| Tryptophan--tRNA ligase, mitochondrial                                                                                      | WARS2                              |             | 0          |
| Tropomyosin alpha-1 chain                                                                                                   | TPM1                               |             | 31148000   |
| Putative uncharacterized protein C10orf128                                                                                  | hCG_1653562;C10orf128              |             | 13492000   |
| Collagen alpha-3(VI) chain                                                                                                  | COL6A3;DKFZp686K04147              |             | 11303000   |
| Gamma-glutamylcyclotransferase                                                                                              | GGCT                               |             | 2382900    |
| Apolipoprotein B-100;Apolipoprotein B-48                                                                                    | APOB                               |             | 20912000   |
| Anaphase-promoting complex subunit 16                                                                                       | C10orf104;ANAPC16                  |             | 11604000   |
| O-acetyl-ADP-ribose deacetylase 1                                                                                           | OARD1                              |             | 14338000   |
| Serine/Arginine-related protein 53                                                                                          | RSRC1                              |             | 64947000   |
|                                                                                                                             | USP4                               |             | 14518000   |
| LIM domain-containing protein 1                                                                                             | LIMD1                              |             | 2780400    |
| Spectrin beta chain, non-erythrocytic 4                                                                                     | SPTBN4;SPNB4                       |             | 406280000  |
| Zinc finger protein 780B                                                                                                    | ZNF780B                            |             | 0          |
|                                                                                                                             | AP2M1                              |             | 0          |
|                                                                                                                             |                                    |             | 9070400    |
| Ephrin type-B receptor 3                                                                                                    | EPHB3                              |             | 58195000   |
| Dihydropyrimidinase-related protein 4                                                                                       | DPYSL4                             |             | 60935000   |
| GPI ethanolamine phosphate transferase 2                                                                                    | PIGG                               |             | 6276400    |
| DNA polymerase kappa                                                                                                        | POLK                               |             | 36794000   |
| Putative sodium-coupled neutral amino acid transporter 9                                                                    | SLC38A9                            |             | 5389200    |
| Probable ATP-dependent RNA helicase DDX4                                                                                    | DDX4                               |             | 89423000   |
| Leucine zipper protein 1                                                                                                    | LUZP1                              |             | 24174000   |
|                                                                                                                             | ENO3                               |             | 0          |

|                                                                                           |                         |           |
|-------------------------------------------------------------------------------------------|-------------------------|-----------|
| Alpha-1-antitrypsin;Short peptide from AAT                                                | DIAPH1                  | 33345000  |
| Cyclic nucleotide-gated cation channel alpha-3                                            | SERPINA1                | 2213300   |
| F-box only protein 3                                                                      | CNGA3                   | 13476000  |
|                                                                                           | FBXO3                   | 17829000  |
|                                                                                           | RPS3                    | 0         |
| Choline kinase alpha                                                                      | CHKA                    | 13672000  |
| Leucine-rich repeat-containing protein 14                                                 | LRRC14                  | 4602400   |
| Epiplakin                                                                                 | EPPK1                   | 23163000  |
| Calcium uptake protein 1, mitochondrial                                                   | MICU1                   | 24280000  |
| Podocalyxin                                                                               | PODXL                   | 24077000  |
| Protein C10                                                                               | C12orf57                | 10609000  |
| RIMS-binding protein 2                                                                    | RIMBP2                  | 22521000  |
| Syntaxin-10                                                                               | STX10                   | 0         |
|                                                                                           | BAG6                    | 72073000  |
|                                                                                           | NAP1L1                  | 71301000  |
| Iron-sulfur protein NUBPL                                                                 | NUBPL                   | 18528000  |
|                                                                                           | CFAP44;DKFZp434A2017    | 4878300   |
| AT-rich interactive domain-containing protein 2                                           | ARID2                   | 77418000  |
| NF-kappa-B inhibitor alpha                                                                | IkBa;NFKBIA             | 36378000  |
| Ubiquitin-conjugating enzyme E2 variant 1                                                 | UBE2V1;UBE2V2           | 0         |
|                                                                                           | SNW1                    | 7712000   |
| Tyrosine-protein kinase receptor                                                          | PPF1BP1;PPF1BP1-ALK     | 9311300   |
| NFX1-type zinc finger-containing protein 1                                                | ZNFX1                   | 12801000  |
|                                                                                           | DDX39B                  | 0         |
| Glycine N-acyltransferase                                                                 | GLYAT                   | 54285000  |
| Ras-related protein Rab-40C                                                               | RAB40C                  | 19033000  |
| Mediator of RNA polymerase II transcription subunit 31                                    | MED31                   | 10474000  |
| Pro-interleukin-16;Interleukin-16                                                         | IL16                    | 29905000  |
| Tyrosine-protein kinase receptor                                                          | TPM3;TPM3-ROS1          | 0         |
| 28S ribosomal protein S7, mitochondrial                                                   | MRPS7                   | 20353000  |
| Protein FAM210A                                                                           | FAM210A                 | 12598000  |
| Transcription elongation factor 1 homolog                                                 | ELOF1                   | 36266000  |
|                                                                                           | ATP5A1                  | 27687000  |
| NADH-ubiquinone oxidoreductase chain 1                                                    | NADH1;ND1               | 10288000  |
|                                                                                           | EIF1AY                  | 46077000  |
|                                                                                           | KHDRBS3                 | 37270000  |
|                                                                                           | POLRMT                  | 2502300   |
| DNA-directed RNA polymerase;DNA-directed RNA polymerase, mitochondrial                    | AAO10;KMT2D             | 24242000  |
| Histone-lysine N-methyltransferase 2D                                                     | SLC31A1                 | 0         |
| High affinity copper uptake protein 1                                                     | KIF5C                   | 15757000  |
| Kinesin heavy chain isoform 5C                                                            | MAST3                   | 37167000  |
| Microtubule-associated serine/threonine-protein kinase 3                                  | CAN2D                   | 79922000  |
| Cullin-associated NEDD8-dissociated protein 2                                             | STX17B                  | 29784000  |
| Serine/threonine-protein kinase 17B                                                       | DUSP14                  | 21214000  |
| Dual specificity protein phosphatase 14                                                   | SERPINC1                | 1985600   |
| Antithrombin-III                                                                          | HRAS;c-bas/has          | 21312000  |
| GTPase HRas;GTPase HRas, N-terminally processed                                           | PIGR                    | 18042000  |
| Polymeric immunoglobulin receptor;Secretory component                                     | PRKCB                   | 31185000  |
| Protein kinase C beta type                                                                | PGK2                    | 104790000 |
| Phosphoglycerate kinase 2                                                                 | CCDC175                 | 0         |
| Coiled-coil domain-containing protein 175                                                 | POTEJ                   | 17337000  |
| POTE ankyrin domain family member J                                                       | AKR1C4                  | 0         |
| Aldo-keto reductase family 1 member C4                                                    | AZU1                    | 1713100   |
| Azurocidin                                                                                | SERPINB3;SCCA2;SERPINB4 | 4935700   |
| Serpin B3;Serpin B4                                                                       | CETN2                   | 3139800   |
| Centrin-2                                                                                 | HAL                     | 25076000  |
| Histidine ammonia-lyase                                                                   | CSNK1E                  | 14709000  |
| Casein kinase I isoform epsilon                                                           | MRPL12;MRPL7/L12        | 0         |
| 39S ribosomal protein L12, mitochondrial                                                  | CKS1B                   | 11698000  |
| Cyclin-dependent kinases regulatory subunit;Cyclin-dependent kinases regulatory subunit 1 | ACTA1                   | 86511000  |
| Actin, alpha skeletal muscle                                                              | CAP1                    | 9749900   |
| Adenylyl cyclase-associated protein 1                                                     | MAP4K2                  | 4089400   |
| Mitogen-activated protein kinase kinase kinase 2                                          | DKFZp686J1497;PTPN13    | 0         |
| Tyrosine-protein phosphatase non-receptor type 13                                         | GRIN2B                  | 0         |
| Glutamate receptor ionotropic, NMDA 2B                                                    | EIF4EBP1                | 23322000  |
| Eukaryotic translation initiation factor 4E-binding protein 1                             | ATP1A4                  | 120260000 |
| Sodium/potassium-transporting ATPase subunit alpha-4                                      | TUBA2;TUBA3C;TUBA3E     | 6748400   |
| Tubulin alpha-3C/D chain;Tubulin alpha-3E chain                                           | PKP1                    | 57284000  |
| Plakophilin-1                                                                             | TUBB2A                  | 39544000  |
| Tubulin beta-2A chain                                                                     | PLEC                    | 111130000 |
| Plectin                                                                                   |                         | 0         |
|                                                                                           | KRTAP11-1               | 65981000  |
| Keratin-associated protein 11-1                                                           | SERPINB12               | 37279000  |
| Serpin B12                                                                                | NIPA1                   | 10961000  |
| Magnesium transporter NIPA1                                                               | KHDC1                   | 18477000  |
| KH homology domain-containing protein 1                                                   | KRTAP13-1;KRTAP13-2     | 44827000  |
| Keratin-associated protein 13-1;Keratin-associated protein 13-2                           |                         | 0         |
| Elongation factor 1-alpha                                                                 | HSP90AB1                | 11222000  |
|                                                                                           | EIF3I                   | 0         |
| Beta/gamma crystallin domain-containing protein 3                                         | CRYBG3                  | 0         |
| AMMECR1-like protein                                                                      | AMMECR1L                | 11379000  |
|                                                                                           | GH1                     | 27706000  |
|                                                                                           |                         | 0         |
|                                                                                           |                         | 0         |
| F-box only protein 50                                                                     | NCCRP1                  | 39847000  |
|                                                                                           |                         | 86685000  |
|                                                                                           |                         | 208170000 |
| Probable proline--tRNA ligase, mitochondrial                                              | PARS2                   | 15544000  |
| MOB kinase activator 1B                                                                   | MOB1B;MOBK1A;MOB4A      | 35793000  |
| Desmoglein-4                                                                              | DSG4                    | 40351000  |
| Valacyclovir hydrolase                                                                    | BPHL                    | 0         |
| Xyloside xylosyltransferase 1                                                             | XXYL1                   | 17438000  |
| Transmembrane protein 163                                                                 | TMEM163                 | 0         |
| Probable tRNA pseudouridine synthase 1                                                    | TRUB1                   | 24880000  |
| Mitochondrial import receptor subunit TOM6 homolog                                        | TOMM6                   | 0         |
| Guanine nucleotide-binding protein G(i) subunit alpha-2                                   | GNAI2                   | 11013000  |
| HAUS augmin-like complex subunit 1                                                        | HAUS1                   | 0         |
| Protein S100-A16                                                                          | S100A16                 | 7504000   |
| Sideroflexin-2                                                                            | SFXN2                   | 17592000  |
| Spermatid perinuclear RNA-binding protein                                                 | STRBP                   | 9320300   |
| RNA-binding protein 4B;RNA-binding protein 4                                              | RBM4B;RBM4              | 0         |
| N-alpha-acetyltransferase 11                                                              | NAA11                   | 6749500   |
| Egl nine homolog 1                                                                        | EGLN1                   | 18171000  |
| Cytosolic 5-nucleotidase 3A                                                               | NT5C3A                  | 33243000  |
| Vertnin                                                                                   | VRTN                    | 36567000  |
| Protein S100-A14                                                                          | S100A14                 | 5160600   |
| Acyl-coenzyme A thioesterase 13;Acyl-coenzyme A thioesterase 13, N-terminally processed   | ACOT13                  | 24686000  |
| NAD-dependent protein deacetylase sirtuin-5, mitochondrial                                | SIRT5                   | 49750000  |



Hexaprenyldihydroxybenzoate methyltransferase, mitochondrial  
EH domain-containing protein 3  
E3 ubiquitin-protein ligase RNF181  
ATP-binding cassette sub-family D member 2

COQ3  
EHD3  
RNF181  
ABCD2

0  
66631000  
0  
70714000  
12227000
